# Supplementary material
Source: publisher figshare collection journal article supplement (https://gsapubs.figshare.com/articles/dataset/_/24066384)
Supplement: Supplementary file 1 [file 1]

## Sheet: Whole Rock Geochemistry
Whole Rock major and trace element analyses with calculated errors
				XRF data																		LA-ICP-MS data
Unknowns	Latitude	Longitude		SiO2	TiO2	Al2O3	Fe2O3T	MnO	MgO	CaO	Na2O	K2O	P2O5	Total	LOI	Sr	Zr	Cr	V			P	Sc	V	Cr	Mn	Co	Ni	Cu	Zn	Rb	Sr	Y	Zr	Nb	Cs	Ba	La	Ce	Pr	Nd	Sm	Eu	Gd	Tb	Dy	Ho	Er	Tm
AL20-01	32.85	-85.17		47.89	0.74	16.83	13.8	0.21	7.11	11.51	1.13	0.38	0.05	99.65	0.86	112	13	0	437			153.35	48.02	290.5	401.97	1858.45	68.23	181.14	88.78	44.73	3.09	131.49	21.09	47.06	1.14	0.04	145.56	3.32	9.34	1.45	7.44	2.46	0.95	3.18	0.57	3.83	0.82	2.45	0.34
AL20-04B	32.83	-85.34		53.01	1.54	13.61	13.69	0.22	5.92	8.58	3.24	0.07	0.1	99.98	0.21	104	58	0	348			516.67	36.24	362.94	239.32	1824.82	43.51	92.35	40.89	146.16	1.18	131.66	25.01	61.13	1.64	0.1	18.84	3.47	10.29	1.81	8.66	3.03	1.2	3.98	0.78	4.63	0.98	2.8	0.44
AL20-05	32.83	-85.34		48.28	0.92	16.17	10.34	0.24	9.62	10.6	3.14	0.26	0.03	99.6	1.91	93	32	283	254			235.61	46.32	423.21	95.43	1422.61	51.98	122.01	54.98	98.81	5.29	139.38	6.96	26.08	2.18	0.03	54.35	5.06	12.15	1.56	6.29	1.42	0.58	1.43	0.22	1.4	0.28	0.86	0.12
AL20-06	32.83	-85.34		45.01	0.8	16.57	9.62	0.22	4.97	21.69	0.63	0.12	0.05	99.68	0.74	322	0	201	286			-70.2	53.92	177.46	206.2	1429.52	59.15	125.49	61.45	50.77	16.87	106.32	4.45	5.51	0.25	0.86	32.87	2.01	3.53	0.56	2.41	0.56	0.29	0.5	0.1	0.72	0.18	0.47	0.05
AL20-15	32.74	-85.76		49.05	0.11	18.52	4.93	0.11	10.81	15.25	0.52	0.28	0	99.58	1.36	92	5	887	102			-91.45	32.91	116.09	915.73	801.41	53.73	123.99	62.14	27.83	9.32	106.92	2.31	2.78	0.25	0.18	38.89	0.7	1.38	0.26	1.08	0.25	0.17	0.46	0.06	0.42	0.09	0.26	0.04
AL20-19	32.93	-85.48		49.66	0.14	17.71	5.97	0.11	10.95	14.65	0.52	0.04	0	99.75	1.18	68	7	202	136			42.63	105.93	405.16	5829.53	4326.06	221.51	1236.07	162.55	202.18	1.42	37.96	9.11	8.52	0.3	0.12	12.39	1.46	3.05	0.56	2.8	0.99	0.29	1.05	0.19	1.51	0.34	1.16	0.17
AL20-20	32.93	-85.48		51.79	0.16	4.62	9.86	0.2	17.41	15.68	0.14	0.02	0	99.88	0.15	6	10	975	265			59.85	38.09	130.38	142.36	1062.62	46.13	105.26	150.14	185.06	18.44	76.95	3.85	7.74	0.2	0.86	37.76	1.25	2.29	0.39	1.92	0.58	0.26	0.57	0.11	0.68	0.14	0.4	0.07
AL20-23	32.86	-85.66		44.05	0.6	17.05	14.39	0.2	8.68	13.64	0.64	0.22	0.02	99.49	2.28	65	0	18	492			116.62	56.47	519.64	139.06	1509.32	50.19	97.46	85.09	86.96	22.06	93.55	5.07	1.01	0.07	0.63	65.07	3.1	1.09	0.96	3.73	1.03	0.39	0.99	0.18	1.17	0.23	0.67	0.1
AL20-24	32.86	-85.66		53.9	0.11	3.98	10.66	0.2	25.83	4.99	0.16	0.03	0	99.86	1.6	4	7	1892	125			10.54	13.35	52.4	97.34	304.86	15.55	50.11	22.09	12.22	0.44	28	1.47	1.46	0.02	0.03	9.86	0.46	1.08	0.14	0.63	0.2	0.09	0.21	0.04	0.31	0.06	0.19	0.02
AL20-26	32.86	-85.66		48.95	0.26	10.25	13.82	0.25	15.86	10.27	0.2	0.01	0	99.87	-0.04	47	4	852	352			10.59	37.54	287.86	70.34	895.12	40.13	82.08	79.28	43.37	0.54	83.14	1.51	1.18	0.02	0.17	3.83	0.23	0.67	0.1	0.61	0.22	0.11	0.26	0.04	0.3	0.06	0.19	0.03
AL20-27	32.86	-85.66		46.74	0.29	17.06	11.22	0.17	10.27	14.17	0.32	0.01	0	100.25	0.16	85	0	3	374			70.4	81.41	527.23	1282.67	2549.43	111.19	248.6	64.06	117.81	2.88	98.76	4.15	2.76	0.04	0.2	41.62	0.81	1.65	0.3	1.6	0.58	0.22	0.65	0.12	0.78	0.17	0.48	0.08
AL20-28	32.86	-85.66		43.96	0.74	21.49	14.24	0.24	6.07	12.54	0.51	0.07	0.07	99.93	0.54	144	0	0	372			124.45	57.74	384.43	359.6	1498.05	65.13	153.69	133.15	87.06	1.61	125.49	6.26	8.83	0.42	0.08	26.94	2.49	6.02	0.87	4.02	1.16	0.38	1.14	0.19	1.21	0.26	0.71	0.11
AL20-29	32.85	-85.66		47.52	0.36	15.28	13.05	0.2	10.39	12.43	0.57	0.04	0.02	99.86	0.35	87	3	251	350			372.11	33.94	392.82	82.76	1735.66	52.1	78.04	38.76	66.46	3.11	195.22	3.02	6.32	0.45	0.11	20.04	2.52	4.91	0.59	2.57	0.63	0.58	0.59	0.09	0.56	0.12	0.36	0.05
AL20-30	32.85	-85.65		49.56	0.11	15.07	9.48	0.18	12.41	13.02	0.39	0.04	0	100.26	0.3	75	5	292	161			511.56	23.94	155.99	389.88	1031.43	71.14	244.59	52.6	58.53	10.78	615.9	15.26	90.78	4.17	0.41	97.94	6.54	16.56	2.17	10.44	2.6	1.08	2.82	0.47	2.97	0.61	1.74	0.22
AL20-31	32.93	-85.63		44.88	0.63	17.69	14.87	0.2	7.04	13.32	0.99	0.04	0.02	99.68	0.44	93	0	0	501			135.62	58.22	521.55	82.19	1506.74	54.93	66.73	81.03	97.06	0.89	130.98	6.59	6.36	0.25	0.08	15.23	1.87	4.46	0.69	3.65	1.09	0.43	1.29	0.21	1.37	0.28	0.82	0.11
AL20-32	32.9	-85.66		46.84	0.82	19.51	7.66	0.11	10.72	10.78	2.35	0.35	0.09	99.23	0.35	428	47	255	122			1.01	44.75	146.72	306.51	1100	48.4	103.87	61.91	49.7	1.25	80.15	2.55	3.49	0.1	0.15	17.33	0.72	1.81	0.26	1.41	0.46	0.16	0.51	0.08	0.52	0.11	0.32	0.04
AL20-35	32.73	-85.77		54.56	0.53	17.45	11.83	0.16	3.16	9.76	1.8	0.17	0.14	99.56	0.45	109	0	0	255			63.69	60.9	194.08	674.32	1065.99	39.47	99.95	33.89	40.43	1.93	16.92	3.37	3.64	1.19	0.07	40.26	2.22	3.4	0.58	2.45	0.59	0.14	0.59	0.09	0.54	0.13	0.38	0.05
AL20-36	32.82	-85.65		43.75	0.33	19.21	14.78	0.15	7.43	14.16	0.33	0.03	0.01	100.18	0.25	70	0	0	576			55.47	50.5	603.22	96.98	1175.38	55.08	117.44	212.89	56.72	1.08	101.06	1.16	1.56	0.26	0.29	7.96	0.55	1.26	0.17	0.77	0.21	0.11	0.21	0.03	0.23	0.05	0.12	0.02
AL20-37	32.81	-85.66		51.65	0.14	4.15	10.94	0.21	17.42	14.63	0.26	0.05	0.02	99.47	0.43	14	10	921	270			1051.59	65.14	406.78	18.42	1824.76	67.35	48.7	89.98	150.38	4.74	223.46	24.73	31.86	3.91	0.14	60.79	8.91	23.82	3.58	17.25	4.53	1.19	4.52	0.74	4.59	0.97	2.82	0.42
AL20-38	32.74	-85.48		50.28	1.04	17.81	12.62	0.25	6.48	9.01	1.92	0.68	0.22	100.31	5.63	61	81	37	316			156.34	40.28	267.69	42.45	1090.44	46.34	46.18	82.29	61.76	3.88	60.84	6.97	3.22	0.3	0.09	5.74	1.35	4.33	0.74	3.78	1.08	0.32	1.15	0.2	1.27	0.27	0.84	0.12
AL20-41	32.61	-85.69		49.28	1.17	14.74	11.97	0.19	7.88	12.51	2.37	0.08	0.07	100.26	0.6	116	43	181	297			479.8	49.6	335.03	326.88	2513.97	82.8	125.42	46.76	192.35	5.61	114.14	23.35	69.94	2.32	0.42	92.22	7.67	17.21	2.46	11.2	3.2	1.2	3.82	0.69	4.28	0.95	3.04	0.43
AL20-43	32.78	-85.67		46.73	0.36	16.76	13.19	0.21	7.91	12.82	1.06	0.71	0.04	99.79	0.81	62	2	0	359			1498.32	60.3	462.56	195.14	2561.86	90	112.43	145.7	129.57	12.05	121.94	41.42	152.83	4.36	0.22	350.56	19.52	36.51	7.11	30.41	8.22	2.35	8.06	1.31	8.73	1.88	5.48	0.84
AL20-45	32.87	-85.64		45.69	3.18	13.9	18.27	0.28	4.88	10.87	1.75	0.87	0.61	100.3	1.77	94	231	0	542			2515.66	39.41	517.86	34.45	2385.9	45.38	68.86	164.85	299.52	5.55	125.84	51.27	298.78	20.73	0.26	119.11	33.44	71.77	9.71	40.89	10.25	2.84	9.53	1.57	10.01	2.07	5.85	0.84
AL20-47	32.95	-85.18		56.37	0.68	15.07	8.92	0.22	7.45	8.36	2.95	0.15	0.08	100.25	2.44	60	45	156	226			219.78	29.03	198.03	181.9	995.19	36.85	82.98	59.15	90.7	1.42	94.48	15.1	36.24	0.78	0.03	8.53	1.27	4.15	0.79	4.6	1.57	0.66	2.11	0.41	2.69	0.6	1.6	0.26
AL22-04	32.93	-85.66		46.09	0.61	18.06	12.97	0.21	8	12.7	0.96	0.09	0.04	99.73	1.62	104			362			188.4	49.75	305.28	39.14	0	48.75	33.62	46.8	78.05	3.59	130.78	8.41	4.89	0.54	0.17	27.65	2.17	5.64	0.8	4.23	1.29	0.55	1.53	0.25	1.47	0.34	0.93	0.14
AL22-05	32.93	-85.66		42.55	1.12	19.11	17.41	0.22	6.1	12.69	0.91	0.09	0.03	100.23	0.51	125			590			145.17	50.22	490.94	19.66	0	56.43	30.04	55.21	87.13	1.9	164.97	5.72	1.39	0.14	0.1	6.43	0.83	1.93	0.36	2.24	0.75	0.62	0.99	0.19	1.15	0.24	0.71	0.1
AL22-07	32.94	-85.63		48.49	0.3	17.23	9.19	0.16	9.87	13.21	0.89	0.14	0.02	99.5	1.15	92			225			77.43	49.64	203.72	80.89	0	51.96	49.67	51.94	51.69	3.63	112.94	9.67	8.18	0.66	0.39	17.79	3.17	4.95	0.92	4.2	0.94	0.42	1.38	0.24	1.37	0.33	0.9	0.13
AL22-11	33.03	-85.14		46.87	1.06	12.7	11.3	0.37	8.58	16.5	1.71	0.31	0.07	99.47	0.99	129		257	293			321.13	40.7	260.97	319.31	0	46.04	113.16	23.32	76.4	7.07	161.06	37.96	56.5	2.41	0.22	104.1	4.71	13.05	1.88	9.96	3.51	1.2	4.96	0.84	5.72	1.28	3.85	0.55
AL22-14	32.73	-85.79		48.93	0.45	16.6	14.04	0.22	6.83	11.25	1.29	0.34	0.04	99.99	0.98	72			461			418.66	61.71	440.95	78.76	1678.57	58.23	34.44	100.73	122.75	8.9	99.86	18.34	33.94	2.98	0.19	65.79	5.45	14.93	2.38	10.81	3.29	0.66	3.32	0.51	2.97	0.67	1.99	0.28
AL22-18	32.66	-85.66		55.65	0.84	17.66	10.24	0.16	5.46	7.32	1.9	0.27	0.06	99.56	4.7	60			292			268.51	37.51	255.94	68.23	0	50.07	29.54	13.49	62.59	4.31	77.2	40.29	101.26	2.29	0.05	72.51	7.97	17.95	3.99	18.26	4.99	1.21	5.88	1.04	6.59	1.47	4.66	0.74
AL22-21	32.7	-85.6		49.59	1.7	14.61	13.51	0.21	7.34	10.52	2.2	0.25	0.15	100.08	1.98	88		75	406			620.37	50.34	335.35	165.41	0	46.84	59.89	69.31	112.92	3.4	115.1	40.02	101.99	2.36	0.18	83.59	4.26	15.22	2.19	11.85	4.17	1.42	6.25	1.02	6.68	1.48	4.51	0.66
AL22-26	32.86	-85.66		47.29	0.29	17.84	10.59	0.18	9.63	13.72	0.47	0.06	0.01	100.08	1.64	80			344			26.99	54.68	293.14	65.54	78.92	46.98	40.19	32.14	63.52	1.61	96.4	3.89	3.82	0.16	0.03	19	0.74	1.99	0.32	1.73	0.59	0.22	0.66	0.11	0.71	0.15	0.45	0.06
AL22-27	32.77	-85.45		56.38	0.12	17.98	6.15	0.13	6.54	10.78	1.26	0.17	0.01	99.52	1.4	105		103	135			62.94	39.49	124.54	178.1	159.42	55.32	88.04	19.07	38.96	2.54	121.16	11.18	29.29	1.17	0.09	43.61	3.94	12.7	1.19	5.04	1.46	0.26	1.45	0.31	1.77	0.36	1.24	0.19
AL22-28	32.77	-85.45		48.63	3.1	16.68	18.74	0.24	5.13	6.17	1.43	0.16	0.3	100.58	5.97	12			471			1337.82	50.07	365.6	62.6	159.42	60.55	33.21	74.02	76.23	1.62	30.33	67.1	210.22	4.47	0.04	26.45	8.78	23.81	4.14	21.9	7.06	2.28	9.24	1.68	11.26	2.44	7.34	1.12
AL22-29	32.75	-85.4		48.89	0.84	15.22	9.87	0.17	7.72	13.95	2.74	0.21	0.06	99.67	0.62	113		292	257			268.02	42.57	228.77	357.85	80.49	54.47	110.26	10.16	85.1	3.94	144.4	23.56	42.84	0.64	0.18	33.92	1.31	3.74	0.87	5.36	1.96	0.78	3.24	0.58	3.8	0.85	2.5	0.38
AL22-30	32.78	-85.39		48.56	1.15	15.43	11.34	0.17	8.27	11.36	3.23	0.27	0.07	99.85	0.5	117		288	305			304.49	43.51	268.56	363.21	0	48.41	82.77	12.61	67.35	6.21	147.96	29.15	61.53	1.41	0.1	39.01	2.7	6.66	1.36	7.61	2.8	0.98	3.87	0.71	4.77	1.01	3.09	0.45
AL22-31	32.88	-85.35		51.46	1.04	15.03	15.82	0.18	4.74	9.27	1.62	0.41	0.07	99.64	0.79	141			334			313.59	51.43	276.37	28.43	0	40.52	41.1	15.27	59.59	8.28	181.92	31.45	37.83	1.54	0.19	140.96	6.75	10.25	2.43	11.83	3.7	1.06	4.35	0.71	4.9	1.1	3.25	0.46
AL22-32	32.81	-85.34		50.5	0.86	7.96	10.36	0.17	12.96	15.59	1.52	0.4	0.06	100.38	0.4	69		1472	385			239.04	73.05	330.59	1351.48	0	52.66	143.01	17.27	102.7	3.63	85.52	23.1	63.07	2.82	0.1	67.56	9.4	26.45	4.33	21.83	5.7	1.38	5.7	0.84	4.55	0.87	2.36	0.34
AL22-33	32.92	-85.16		44.89	0.66	17.62	15.11	0.24	7.61	13.19	0.8	0.02	0.07	100.21	0.11	103			437			314.56	57.69	371.43	33.89	0	55.2	33.86	46.57	88.3	0.88	140.06	10.59	3.8	0.5	0.06	9.33	1.98	5.44	0.94	5.04	1.64	0.6	1.76	0.29	1.94	0.42	1.18	0.17
AL22-34	33.08	-85.22		54.33	0.49	15.86	9.46	0.18	6.34	10.43	2.05	0.82	0.08	100.04	0.94	161		64	245			374.2	52.75	239.25	161.8	562.57	67.33	67.44	26.28	73.19	17.29	219.73	26.26	39.42	1.94	0.12	226.52	9.3	20.01	2.85	12.56	3.35	0.85	3.68	0.58	4.04	0.86	2.72	0.4
AL22-35	32.92	-85.32		49.33	1.32	14.66	11.61	0.18	7.41	12.35	2.84	0.11	0.1	99.91	0.65	124		93	354			347.24	43.5	253.79	150.17	1122.1	43.31	50.67	30.44	62.76	1.16	132.89	32.51	59.1	1.27	0.03	14.23	3.97	6.93	1.74	9.01	3.09	1.21	4.46	0.81	5.32	1.17	3.5	0.5
Standards-certified	Reference			SiO2	TiO2	Al2O3	Fe2O3T	MnO	MgO	CaO	Na2O	K2O	P2O5			Sr	Zr	Cr	V			P	Sc	V	Cr	Mn	Co	Ni	Cu	Zn	Rb	Sr	Y	Zr	Nb	Cs	Ba	La	Ce	Pr	Nd	Sm	Eu	Gd	Tb	Dy	Ho	Er	Tm
NIST-612	GeoRem database			Not used in major element analyses												78.4	37.9	36.4	38.8			46.6	39.9	38.8	36.4	38.7	35.5	38.8	37.8	39.1	31.4	78.4	38.3	37.9	38.9	42.7	39.3	36	38.4	37.9	35.5	37.7	35.6	37.3	37.6	35.5	38.3	38	36.8
NIST-610	GeoRem database															515.5	448	408	450			413	455	450	408	444	410	458.7	441	460	425.7	515.5	462	448	465	366	452	440	453	448	430	453	447	449	437	437	449	455	435
AGV2	USGS			59.14	1.051	17.03	6.78	0.1004	1.8	5.15	4.204	2.898	0.483			658	230	17	120			2100	13	120	17		16	19	53	86	68.6	658		230	15	1.16	1140	38	68	8.3	30	5.7	1.54	4.69	0.64	3.6	0.71	1.79	0.26
BHVO2G	USGS			49.6	2.731	13.44	12.39	0.169	7.257	11.4	2.219	0.513	0.2685			396	170	293	308			1266	33	308	293		44	116	127	102	9.2	396		170	18.3	0.1	131	15.2	37.6	5.35	24.5	6.1	2.07	6.16	0.92	5.28	0.98	2.56	0.34
BCR2G	USGS			54	2.265	13.48	13.77	0.1966	3.599	7.114	3.12	1.774	0.3593			342	184	17	425			1615	33	425	17		38	13	21	125	47	342		184	12.5	1.16	683	24.7	53.3	6.7	28.9	6.59	1.97	6.71	1.02	6.44	1.27	3.7	0.51
From Franklin & Marshall	Standards analyzed			SiO2	TiO2	Al2O3	Fe2O3T	MnO	MgO	CaO	Na2O	K2O	P2O5							Date of analysis	Standards analyzed	P	Sc	V	Cr	Mn	Co	Ni	Cu	Zn	Rb	Sr	Y	Zr	Nb	Cs	Ba	La	Ce	Pr	Nd	Sm	Eu	Gd	Tb	Dy	Ho	Er	Tm
	BHVO-2 A			49.693	2.716	13.33	12.64	0.169	7.104	11.436	2.149	0.506	0.274							2021-09-20	NIST 612-1	46.1005	39.9163	38.7291	36.2887	38.6564	35.3723	38.7954	37.681	39.1371	31.3255	78.4688	38.3248	37.405	39.1949	42.6772	39.3476	36.1649	38.6684	38.0191	35.3827	37.5059	35.6003	37.2285	37.7547	35.365	38.0446	37.9185	36.9564
	BHVO-2 B			50.09	2.724	13.464	12.427	0.168	7.173	11.469	2.165	0.508	0.274							2021-09-20	NIST 612-2	47.6916	39.754	38.6896	36.3505	38.6446	35.3467	38.6745	38.0751	38.9121	31.4473	77.8122	38.103	38.4647	38.6502	42.7059	38.9809	35.4867	37.8337	37.397	35.3327	38.6086	34.8052	37.3582	37.5526	35.5735	38.346	38.3673	36.4958
	BHVO-2 B1			50.223	2.718	13.539	12.412	0.167	7.182	11.45	2.185	0.509	0.275							2021-09-20	NIST 612-3	45.659	40.5345	39.205	36.6379	40.1413	36.4602	39.3982	38.4973	39.2857	32.7823	79.3778	38.5588	38.3071	41.1149	43.2425	40.6846	37.2286	39.2302	39.4665	37.1417	38.7075	37.2408	38.2124	38.1723	35.9204	39.8849	38.2219	38.3073
	BHVO-2 C			49.844	2.715	13.372	12.576	0.168	7.101	11.445	2.153	0.505	0.275							2021-09-20	NIST 612-4	47.833	39.5344	38.6053	36.5051	38.4165	35.4404	38.7386	37.6342	39.0344	31.2854	78.3227	38.1475	37.3475	38.7259	42.1092	40.0066	35.7764	38.4587	37.0464	35.247	37.1233	36.081	36.8535	36.9066	35.068	37.3852	37.737	36.1452
	BHVO-2 D			50.118	2.692	13.583	12.435	0.168	7.144	11.344	2.226	0.514	0.282							2021-09-20	NIST 612-5	47.2699	40.3595	38.3206	36.3856	39.0568	35.5979	39.2909	38.2083	39.2601	31.3445	78.424	38.4114	38.3607	39.208	42.9373	39.0211	36.4836	38.4488	38.4641	35.1132	37.9805	34.8511	37.8487	37.748	35.6343	38.4587	38.5813	36.8226
	BHVO-2 D1			50.111	2.689	13.597	12.442	0.168	7.145	11.338	2.224	0.513	0.281							2021-09-20	NIST 612-6	45.9058	39.6653	39.0985	35.5322	38.8055	35.1244	38.7197	37.4454	39.067	31.5356	78.4427	38.2351	37.8983	38.6938	42.6827	38.6514	36.2499	37.7706	37.5909	35.5733	37.4418	35.577	36.8322	37.9192	35.2478	38.595	37.9028	37.7615
	BHVO-2 E			49.972	2.719	13.414	12.392	0.168	7.136	11.466	2.154	0.506	0.275							2020-02-10	NIST612-1	41.9456	39.2666	39.1835	37.6201	38.1761	34.4312	39.4843	41.1356	40.3963	31.1279	76.3848	38.3695	39.6379	38.0733	39.4585	39.2405	34.7047	37.144	36.086	35.2845	38.2706	34.2575	38.3921	35.7933	35.1	36.0809	36.8972	35.3619
	BHVO-2 F			49.873	2.706	13.414	12.55	0.166	7.136	11.405	2.157	0.505	0.275							2020-02-10	NIST612-9	43.2508	40.1903	38.9349	36.2196	37.6702	34.1945	39.817	40.9339	38.9597	31.3122	76.4477	39.5711	39.6352	38.4079	39.6436	39.4858	35.0668	36.9495	36.4354	36.0226	38.7141	34.0124	39.5148	36.2039	35.3182	37.1374	37.8684	36.171
	BHVO-2 F1			49.806	2.704	13.388	12.546	0.167	7.125	11.395	2.162	0.507	0.273							2020-02-10	NIST612-2	39.1536	39.9232	38.4585	35.8859	37.4485	33.938	38.9393	40.6738	38.7168	30.6861	75.3029	39.7857	39.3269	38.2054	39.2592	39.1952	34.6799	36.3644	36.0178	35.4423	38.2124	33.4989	39.0818	35.4074	37.3331	36.9673	37.1158	35.6316
	BHVO-2 G			49.781	2.707	13.394	12.413	0.167	7.147	11.394	2.158	0.504	0.274							2020-02-10	NIST612-3	40.3318	40.2569	38.8715	35.8369	37.2536	34.4017	39.1487	40.0717	37.8202	30.9464	75.8531	39.9116	40.0336	38.9857	39.0717	39.3196	35.3471	36.6381	36.1211	35.4965	38.9008	33.8513	39.4685	36.1468	37.6084	36.9575	37.7498	36.3036
	BHVO-2 H			49.729	2.716	13.317	12.452	0.167	7.105	11.429	2.148	0.509	0.276							2020-02-10	NIST612-4	36.833	39.4127	38.9467	35.9257	37.818	34.28	38.5654	40.526	38.2637	31.0733	75.4941	38.4153	38.6307	37.8291	39.4385	39.1876	34.5533	36.5004	35.6364	35.1879	37.6512	33.2505	38.4745	35.0105	35.6184	35.9686	36.6254	34.8399
	BHVO-2 H1			49.742	2.715	13.329	12.457	0.167	7.094	11.432	2.142	0.508	0.277							2020-02-10	NIST612-5	42.5662	39.1943	38.1157	35.4728	37.2574	33.4531	38.2079	39.6484	37.4207	30.7768	75.8879	38.5143	38.8732	38.1611	38.7851	39.4966	35.1703	36.4227	36.1126	35.925	38.6129	33.8467	39.274	35.9066	35.7589	36.4026	37.2994	35.5026
	BHVO-2 I			49.863	2.71	13.39	12.406	0.167	7.147	11.439	2.163	0.505	0.275							2020-02-10	NIST612-6	40.0735	39.2538	39.0843	35.7469	37.4698	33.9187	38.7357	40.3668	38.8086	31.4089	75.2497	37.9611	38.5361	37.9756	39.667	39.7594	34.8586	36.7958	35.9861	35.724	38.0647	33.2362	38.5465	35.1897	36.4783	35.6779	36.8204	34.975
	BHVO-2 J			49.388	2.703	13.267	12.208	0.166	7.044	11.38	2.122	0.502	0.271							2020-02-10	NIST612-7	41.7809	39.1873	38.7368	35.5132	37.229	33.9061	38.9216	40.1475	38.0623	30.7218	75.4981	38.2052	38.3541	38.1807	38.9055	39.4439	34.6656	36.3591	36.0807	35.6549	38.0864	33.7201	38.3239	35.1709	36.2818	35.7893	36.5377	34.9027
	BHVO-2 J1			49.385	2.706	13.248	12.211	0.167	7.04	11.377	2.122	0.503	0.271							2020-02-10	NIST612-8	42.2757	39.3318	38.4519	35.6262	37.3181	33.8588	38.3798	40.2084	38.6397	31.0522	74.6631	38.1783	38.578	37.6269	39.294	39.6301	34.7052	36.2036	36.0169	36.15	38.1827	33.4647	39.0275	35.3464	35.999	35.7596	36.6928	34.7434
	BHVO-2 K			49.759	2.704	13.358	12.525	0.167	7.114	11.402	2.149	0.506	0.274							2020-02-10	NIST612-10	36.5553	36.7982	38.6801	35.964	37.9269	33.8179	38.8181	40.2578	38.6191	31.3556	74.4398	35.1473	35.0413	35.7201	39.792	39.4307	32.5331	36.3302	34.9555	33.9478	35.8041	32.0717	35.9138	32.1107	31.8754	33.1539	33.634	31.8231
	BHVO-2 L			49.741	2.717	13.31	12.236	0.167	7.096	11.441	2.127	0.502	0.275							2022-08-25	G_NIST612	48.6914	40.618	37.1153	38.6138		36.6406	39.7117	42.701	36.1148	33.2998	79.7177	42.5894	40.5544	39.5985	45.4636	40.4007	37.4052	40.7168	40.7251	37.3033	38.776	35.8655	39.3257	39.238	36.9836	38.8085	39.8558	39.7248
	BHVO-2 L1			49.73	2.718	13.336	12.236	0.167	7.104	11.442	2.134	0.502	0.274							2022-08-25	G_NIST612_1	51.3851	39.7584	38.291	39.159		35.2537	37.8518	42.4835	32.7139	32.0084	78.4532	40.4641	40.4422	37.2266	44.5373	38.5405	35.9434	38.9507	38.7508	35.3713	35.9547	32.7342	35.9736	35.7555	33.2795	34.6526	36.5917	34.8329
	BHVO-2 L2			49.927	2.718	13.434	12.234	0.168	7.114	11.442	2.155	0.504	0.274							2022-08-25	G_NIST612_2	47.724	38.6379	37.3114	36.7694		35.586	38.2776	41.0746	34.8659	32.1621	78.9516	41.4241	40.0764	39.0473	45.6711	39.3999	35.9099	39.9497	39.881	36.9199	37.9607	34.3235	37.7216	37.3942	34.1656	36.9359	38.2038	37.3894
	BHVO-2 M			50.011	2.72	13.439	12.458	0.167	7.161	11.446	2.142	0.505	0.276							2022-08-25	G_NIST612_3	46.4881	41.5781	38.0333	37.1077		37.0706	38.609	42.7661	35.7206	33.3107	81.8365	41.9813	41.146	39.2766	45.7101	41.0591	37.1008	40.9609	40.5046	37.8224	38.5546	35.4026	38.1625	38.3439	34.8648	37.9698	37.0322	38.3001
	BHVO-2 N			49.823	2.72	13.327	12.448	0.168	7.113	11.452	2.139	0.507	0.276							2022-08-25	G_NIST612_4	46.5899	40.7793	37.1245	38.027		36.4741	39.5469	42.6499	36.7139	32.976	80.6366	42.5801	39.7502	39.4157	45.4081	40.5741	36.7812	41.4739	40.8528	37.8259	39.7709	36.4655	40.0548	41.1041	36.992	39.7669	41.5603	41.2053
	BHVO-2 N1			49.746	2.723	13.356	12.44	0.168	7.103	11.439	2.14	0.504	0.273							2022-08-25	G_NIST612_5	46.1257	40.335	38.2053	37.715		37.5082	39.0265	42.9772	35.7467	33.7456	81.1137	42.8492	40.0201	39.6418	42.9821	39.5325	35.5649	38.428	39.4129	35.5739	36.6446	33.5181	36.6883	36.9333	34.4793	37.0167	37.0571	38.2218
	BHVO-2 O			49.596	2.699	13.294	12.35	0.166	7.086	11.359	2.143	0.504	0.273							2022-08-25	G_NIST612_6	50.8124	40.1241	36.7746	38.9221		36.4969	39.3571	42.568	35.3026	33.1423	79.3864	42.0427	40.7258	38.9971	44.1429	39.6842	38.4468	40.9848	41.7454	37.9345	39.4073	35.901	40.8843	40.694	37.8842	39.28	41.555	41.4144
	BHVO-2 P			50.036	2.72	13.464	12.174	0.168	7.166	11.459	2.158	0.505	0.274							2022-08-25	G_NIST612_7	50.6849	41.071	37.4725	39.3532		36.6878	41.402	44.0499	36.5941	33.9978	80.7288	43.4678	42.1501	39.3864	46.3144	41.0818	38.5843	41.9104	41.7035	38.4111	40.3251	37.4134	40.7885	40.483	39.2101	40.031	41.6667	41.4211
	BHVO-2 P1			50.067	2.717	13.464	12.169	0.168	7.159	11.444	2.157	0.504	0.275							2022-08-25	G_NIST612_8	47.2731	40.1537	36.7414	37.5014		36.2275	40.0119	42.6536	35.9353	33.148	79.3447	43.7007	40.0106	39.2259	46.1482	40.6163	37.8713	40.587	41.45	37.9911	39.8461	36.9323	40.5774	40.5872	38.6301	41.028	42.2528	41.7334
	BHVO-2 Q			49.58	2.712	13.31	12.534	0.167	7.082	11.426	2.123	0.504	0.272							2022-08-25	G_NIST612_9	48.18	41.4778	37.0837	39.1289		37.2517	40.8741	42.8676	37.4254	33.3721	81.3758	42.8737	41.3154	41.5985	46.7038	42.199	38.2964	42.6619	41.2568	38.3123	40.7883	37.4155	41.771	40.8425	38.7158	42.2166	42.2668	42.8369
	BHVO-2 R			49.832	2.705	13.393	12.627	0.167	7.124	11.412	2.149	0.508	0.273							2022-08-25	G_NIST612_10	49.2474	39.1057	35.9916	38.3392		36.8849	39.162	42.9802	36.6395	33.135	78.2395	41.6058	39.1433	39.3458	46.5707	40.4355	37.0292	40.2486	41.4168	37.3133	37.3685	36.182	39.2656	38.6667	36.7613	38.2551	39.734	37.7388
	BHVO-2 R1			49.782	2.706	13.386	12.623	0.167	7.113	11.401	2.153	0.505	0.274							2022-08-25	G_NIST612_11	49.8667	39.8504	37.8429	40.1619		37.7239	40.5049	43.4166	38.327	33.9888	81.3555	41.915	41.143	40.3969	48.0846	41.0804	38.4429	43.0774	41.8239	37.8517	40.2253	38.338	40.5848	40.7957	39.5426	41.0103	43.5307	41.1518
	BHVO-2 S			49.511	2.709	13.294	12.619	0.167	7.062	11.397	2.123	0.504	0.273							2022-08-25	G_NIST612_12	52.3831	41.3269	36.7043	40.092		36.4701	39.3254	42.3715	36.4771	33.0668	78.3534	43.0898	41.3145	38.8202	45.572	39.5228	36.7873	38.7214	39.4352	34.4856	36.7199	34.1209	36.8256	36.3384	34.244	35.3246	37.8713	37.1314
	BHVO-2 T			49.967	2.714	13.449	12.553	0.167	7.161	11.433	2.184	0.51	0.276							2022-08-25	G_NIST612_13	50.7278	40.9679	36.6602	39.8366		36.8334	40.3484	41.9247	37.2707	34.049	80.8911	43.4982	40.2088	41.3858	45.8311	40.6288	39.022	41.3526	41.925	37.6814	40.3661	36.2495	39.0976	37.8343	37.0577	37.2074	39.0561	38.1705
																				2022-08-25	G_NIST612_14	47.874	40.2178	37.3951	38.4752		36.7947	39.8364	43.3634	36.6762	33.5695	78.1825	41.9142	39.06	39.2968	43.401	38.6346	35.3474	38.5946	38.1758	34.7827	35.9995	33.5927	36.5772	37.2794	34.9549	36.2742	36.4949	37.953
																				2022-08-25	G_NIST612_15	47.6595	40.0282	35.7911	38.2149		35.8301	39.9578	41.4724	35.2896	32.9731	77.4097	42.762	39.5503	39.3736	43.5874	40.4451	37.9936	40.3876	41.4026	37.403	39.3021	36.1068	40.4029	40.7118	38.9946	40.6471	40.4871	41.9494
				SiO2	TiO2	Al2O3	Fe2O3T	MnO	MgO	CaO	Na2O	K2O	P2O5							2022-08-25	G_NIST612_16	48.9624	42.663	36.7903	39.1217		36.9147	40.6353	43.4894	36.8384	33.7866	78.0128	44.0803	41.468	40.4097	45.2722	41.4874	38.7606	42.2081	41.0717	39.5474	39.9238	37.3215	42.1331	41.9558	38.6411	41.0926	40.2092	40.8238
Sd dev				0.204145	0.00858138	0.0849024	0.140933	0.000690411	0.0354969	0.0342193	0.0246965	0.00289751	0.00229976							2022-08-25	G_NIST612_17	45.7689	42.4302	36.7465	38.5095		36.8816	40.3717	42.808	35.4143	33.6645	80.9283	43.7714	41.8993	40.3297	46.944	41.8892	38.0068	41.6875	41.5185	38.9279	40.0353	37.6962	41.0287	41.3265	40.3029	41.0361	41.9786	43.0475
% RSD				0.409731	0.316492	0.634137	1.13414	0.412678	0.498597	0.299649	1.14679	0.572706	0.837291							2021-09-20	NIST 610-1	329.97	472.49	559.819	516.139	552.781	553.881	507.425	549.6	472.925	549.392	564.157	476.129	452.597	526.116	467.298	432.233	464.862	527.931	479.882	414.272	431.877	490.976	444.203	469.685	406.158	461.203	492.07	446.818
Mean				49.8242	2.7114	13.3887	12.4264	0.1673	7.11937	11.4198	2.15353	0.505933	0.274667							2021-09-20	NIST 610-2	356.317	516.511	596.058	510.657	574.915	499.549	501.294	481.866	519.345	536.619	607.754	519.698	486.042	537.322	487.619	450.366	497.478	543.839	499.566	431.215	452.239	500.723	455.343	490.114	436.335	485.858	476.158	487.427
certified values				49.6	2.731	13.44	12.39	0.169	7.257	11.4	2.219	0.513	0.2685							2021-09-20	NIST 610-3	327.179	525.029	588.503	506.292	561.686	524.179	491.108	497.662	461.47	543.464	569.53	494.721	497.935	544.925	472.136	457.107	492.864	542.509	511.646	420.83	466.509	502.927	444.602	493.305	430.93	495.882	469.33	489.532
2 se				0.0372717	0.00156674	0.015501	0.0257307	0.000126051	0.00648082	0.00624756	0.00450894	0.00052901	0.000419877							2021-09-20	NIST 610-4	340.989	561.101	603.976	526.038	581.234	537.628	543.648	544.265	533.581	569.56	589.176	565.742	499.159	547.615	490.925	453.075	477.422	550.823	502.848	442.862	459.84	516.498	460.061	541.175	424.781	565.611	496.246	519.857
																				2021-09-20	NIST 610-5	335.663	553.517	622.064	519.919	575.968	531.662	521.679	524.425	483.149	560.393	620.892	529.131	509.301	531.648	488.84	432.652	500.162	539.175	534.721	436.778	458.831	507.917	471.407	527.614	440.272	534.567	491.477	511.113
																				2021-09-20	NIST 610-6	331.447	513.349	565.598	511.165	553.28	536.582	473.669	504.275	445.138	542.728	567.54	546.985	481.939	528.686	459.98	437.071	488.311	535.532	513.567	429.521	457.454	486.832	429.651	502.413	424.671	515.698	487.833	507.864
																				2020-02-10	NIST610-1.1	411.724	453.715	447.322	406.813	443.02	408.491	457.272	439.59	458.491	422.78	515.357	462.984	448.848	463.777	365.724	449.756	436.504	452.308	447.202	428.163	452.013	445.781	449.706	436.329	436.831	449.725	456.073	434.381
																				2020-02-10	NIST610-9.1	415.554	455.835	454.267	411.59	445.827	412.874	464.066	442.941	464.232	430.973	518.17	461.081	447.958	469.406	367.044	455.314	444.861	455.38	450.549	433.481	456.051	451.146	449.092	439.113	437.355	448.39	455.155	436.756
																				2020-02-10	NIST610-2.1	411.755	451.187	449.251	407.571	443.611	409.778	458.608	441.47	459.601	421.901	513.842	462.811	444.597	463.405	365.416	449.579	433.934	452.539	446.264	424.777	451.498	445.47	442.784	429.525	436.71	447.061	447.436	430.895
																				2020-02-10	NIST610-3.1	413.865	453.693	449.313	407.475	443.343	408.938	457.463	440.095	458.831	422.974	514.795	461.596	445.791	463.395	366.243	453.884	438.292	453.233	447.939	430.193	454.581	448.197	449.738	436.927	437.115	450.015	456.385	436.988
																				2020-02-10	NIST610-4.1	412.586	455.829	449.883	407.954	444.605	410.577	458.545	441.338	460.518	426.28	514.012	462.518	449.251	465.267	365.901	449.1	440.33	452.831	445.96	428.434	452.156	446.228	448.741	436.956	436.851	447.652	454.102	434.009
																				2020-02-10	NIST610-5.1	413.549	453.746	451.068	409.163	443.051	409.491	460.744	440.577	459.466	431.517	520.496	461.686	447.709	469.003	366.542	451.942	444.36	454.766	448.187	431.193	456.295	449.535	450.223	440.7	437.528	450.734	456.868	438.37
																				2020-02-10	NIST610-6.1	412.527	455.314	449.233	406.649	445.041	410.241	457.379	442.437	460.324	423.945	512.417	462.88	448.514	464.068	365.203	453.585	438.305	451.553	449.373	431.225	451.849	443.081	449.554	436.144	436.951	446.84	454.979	433.691
																				2020-02-10	NIST610-7.1	413.867	453.249	450.931	408.658	443.12	409.271	459.828	441.455	459.526	425.961	515.954	460.977	446.066	465.459	366.054	451.805	440.625	453.594	448.439	428.978	454.033	449.006	448.494	438.313	437.251	449.786	455.478	436.792
																				2020-02-10	NIST610-8.1	410.475	453.512	450.422	407.992	444.03	410.112	459.808	442.127	460.811	429.083	519.348	460.5	446.339	464.228	367.24	453.148	439.388	454.288	449.482	429.893	454.601	449.12	448.794	435.67	434.577	447.988	453.613	434.381
																				2020-02-10	NIST610-10.1	414.109	455.789	449.706	407.852	444.121	410.03	457.96	437.885	459.075	424.322	513.971	462.648	449.204	465.392	365.552	449.801	440.18	452.18	445.974	429.815	452.188	443.869	449.014	437.034	437.256	449.287	455.346	434.881
																				2022-08-25	G_AGV2	2484.3	13.0149	116.489	18.2741		16.6551	19.326	54.2164	97.2654	72.5929	650.254		220.749	14.7744	1.25442	1138.59	36.7792	70.0837	8.05118	29.5339	5.27913	1.50993	4.28098	0.579178	3.2673	0.616818	1.72659	0.24333
																				2022-08-25	G_AGV_1	2378.93	12.4082	120.335	21.6945		15.8393	18.5636	53.5906	87.9198	69.2991	620.366		214.627	13.7145	1.20323	1062.19	34.721	67.6108	7.75345	28.0818	4.8953	1.41922	4.15475	0.561204	2.95939	0.604018	1.72699	0.24392
																				2022-08-25	G_AGV_2	2630.28	12.8782	121.649	18.2357		16.782	18.5998	54.5588	95.9847	73.5517	649.935		216.767	14.6267	1.32819	1161.36	35.814	71.1536	8.08617	29.8184	5.2625	1.50636	4.20844	0.583934	3.18072	0.611821	1.76385	0.246781
																				2022-08-25	G_AGV_3	2616.61	12.8049	117.515	18.7681		16.531	19.6467	54.1804	97.8935	72.8434	661.99		216.824	14.7106	1.26689	1136.32	36.2605	69.9379	8.18549	28.9892	5.33068	1.4867	4.39383	0.555688	3.25374	0.596992	1.80426	0.244144
																				2022-08-25	G_AGV_4	2596.7	12.6305	116.486	17.9591		16.7716	19.0199	53.7342	97.8662	69.7725	630.694		207.957	14.2057	1.2004	1075.84	34.126	65.5896	7.37265	26.903	4.7392	1.41172	3.75598	0.515945	2.9183	0.558527	1.56846	0.214164
																				2022-08-25	G_AGV_5	2606.66	12.8516	117.998	18.0583		17.0723	19.4649	55.8762	98.9299	73.1735	659.057		220.19	15.0764	1.21834	1162.08	37.0785	71.8036	8.33184	29.9628	5.37347	1.5487	4.1649	0.564013	3.23318	0.620057	1.71097	0.240334
																				2022-08-25	G_AGV_6	2560.55	13.268	119.031	18.0382		17.3093	19.8384	58.0318	97.8243	75.8349	652.197		222.773	15.3551	1.23863	1171.23	37.5326	72.8135	8.18694	30.218	5.29989	1.57442	4.22783	0.590313	3.16074	0.615558	1.6599	0.234346
																				2022-08-25	G_AGV_7	2515.31	12.9038	116.223	17.5496		16.6749	19.7149	55.5503	98.7821	71.8908	655.902		220.262	14.6933	1.28535	1135.07	38.0234	70.3993	8.18818	29.5454	5.35047	1.51377	4.36182	0.579765	3.32167	0.61544	1.77167	0.239759
																				2022-08-25	G_AGV_8	2407.92	12.8833	114.507	16.8846		16.1961	19.5149	53.9663	97.4584	70.4104	645.28		220.904	14.4433	1.22943	1111.23	35.7488	68.033	7.69645	27.513	4.99575	1.38991	4.12066	0.551261	2.97517	0.583292	1.5988	0.224268
																				2022-08-25	G_AGV_9	2386.54	13.2104	117.382	17.4915		16.9775	19.2581	56.0346	100.699	73.603	655.849		222.789	15.6354	1.29311	1144.33	38.013	70.5543	8.15188	29.6126	5.42541	1.53574	4.27609	0.564193	3.20107	0.608851	1.63387	0.233525
																				2022-08-25	G_AGV_10	2400.82	13.1385	116.151	17.7923		16.7401	19.5901	54.8584	98.7859	72.5015	642.696		217.017	14.9033	1.2278	1068.39	34.799	65.2908	7.51306	27.122	4.7998	1.3876	4.06457	0.519291	2.92253	0.567828	1.55886	0.220118
																				2022-08-25	G_AGV_11	2487.3	12.7319	116.852	17.8951		17.0659	18.8937	53.5707	98.905	72.9503	646.056		220.683	15.0735	1.272	1167.46	36.7791	71.2438	8.14488	30.0365	5.4452	1.58721	4.23223	0.597123	3.41364	0.623868	1.79096	0.255165
																				2022-08-25	G_AGV_12	2510.36	13.1281	119.821	18.1839		16.9421	19.0446	53.6221	99.7168	74.437	665.628		219.877	15.2722	1.28223	1168.54	37.6327	72.6135	8.2363	31.0968	5.37767	1.56262	4.34973	0.619609	3.52427	0.650495	1.78233	0.247094
																				2022-08-25	G_AGV_13	2363.24	13.2845	113.767	17.7851		16.626	18.7822	53.0447	95.4957	72.7989	643.076		223.782	15.1715	1.2395	1162.96	36.9797	71.3303	8.34526	30.6616	5.40942	1.5781	4.53758	0.625153	3.43011	0.644013	1.80844	0.261197
																				2022-08-25	G_AGV_14	2373.36	13.2366	112.394	19.8498		16.0505	19.0007	52.1287	93.3506	70.7405	658.452		225.954	14.7416	1.23226	1164.64	37.8707	71.3081	8.27362	30.6387	5.46722	1.5338	4.51639	0.605227	3.51202	0.649676	1.79466	0.255432
																				2022-08-25	G_AGV_15	2617	12.9673	116.282	18.7904		16.7344	20.1651	55.216	102.19	74.7393	646.28		224.925	14.157	1.2595	1130.05	37.5684	68.1667	8.14489	29.506	5.42126	1.50826	4.45604	0.609562	3.32831	0.621288	1.78316	0.256875
																				2022-08-25	G_AGV_16	2385.77	13.2188	110.441	17.6191		16.2221	19.3439	50.9156	94.3749	71.0134	648.019		220.145	14.2849	1.2234	1157.6	36.9137	70.1531	8.00207	30.5084	5.45283	1.5264	4.3504	0.570746	3.51877	0.6573	1.6949	0.248769
																				2022-08-25	G_AGV_17	2395.75	13.7089	113.47	18.065		16.6008	20.1	52.8001	97.3347	74.5185	672.841		237.251	15.099	1.32494	1176.76	39.3846	73.4219	8.25702	31.8613	5.69916	1.59831	4.6054	0.633003	3.69047	0.656881	1.89986	0.270719
																				2022-08-25	G_BHVO2G	1264.48	33.0485	308.126	293.183		43.995	115.926	126.818	101.93	9.19524	396.383		169.317	18.3221	0.100278	130.71	15.2821	37.3838	5.32632	24.2981	6.03367	2.03889	6.09223	0.90272	5.18115	0.958358	2.52647	0.335917
																				2022-08-25	G_BHVO-1	1281.17	33.2901	318.428	294.096		44.1308	116.448	128.807	101.894	9.23171	395.759		172.589	18.4024	0.104521	131.555	15.4094	38.2252	5.38172	25.412	6.3103	2.10459	6.17968	0.949691	5.18247	0.998806	2.56806	0.345091
																				2022-08-25	G_BHVO-2	1319.9	33.263	307.585	297.384		44.1976	116.388	127.771	104.456	9.1931	406.731		172.13	18.1655	0.0985492	129.125	15.8335	37.3718	5.28176	24.325	5.85819	1.94727	5.90163	0.865797	4.86828	0.910736	2.48546	0.337012
																				2022-08-25	G_BHVO-3	1245.46	32.6844	306.137	285.031		43.8298	115.682	126.908	100.782	9.24234	392.439		170.807	18.6331	0.0945615	132.826	15.3189	37.5839	5.37801	24.3339	6.03842	2.04303	6.16776	0.915874	5.35175	0.986607	2.55209	0.348496
																				2022-08-25	G_BHVO-4	1260.81	32.6055	304.902	288.814		43.5596	113.719	124.741	100.962	9.04445	398.17		165.457	18.0605	0.105197	129.364	14.7231	37.1817	5.25781	24.292	6.08828	2.07855	6.10102	0.906018	5.24789	0.93721	2.55086	0.337993
																				2022-08-25	G_BHVO-5	1273.86	33.0425	308.887	296.138		43.8626	116.637	124.74	102.827	9.09048	401.331		171.45	18.2583	0.0977062	129.395	15.5102	37.3691	5.47519	24.3888	6.14621	2.10166	6.28946	0.90731	5.35279	0.967185	2.56553	0.340449
																				2022-08-25	G_BHVO-6	1308.61	33.0149	308.86	298.557		44.114	118.639	129.261	102.608	9.49209	394.312		165.153	18.3326	0.101777	131.823	15.2255	36.7362	5.3057	23.1435	5.75515	1.90122	5.66215	0.845426	4.86613	0.910717	2.2763	0.308136
																				2022-08-25	G_BHVO-7	1219.07	33.255	313.435	294.372		44.2017	114.429	127.867	101.384	9.03511	396.887		167.185	18.4459	0.0972887	133.686	15.0771	37.9915	5.2731	24.777	6.06316	2.08939	6.13766	0.921329	5.20492	0.985899	2.59307	0.325889
																				2022-08-25	G_BHVO-8	1255.85	33.353	304.646	290.13		44.2315	115.184	126.145	100.116	9.1994	391.107		167.132	18.3625	0.104179	131.766	15.4347	37.2407	5.33966	24.5349	6.07413	2.06404	6.08801	0.925294	5.16531	0.957784	2.48379	0.333262
																				2022-08-25	G_BHVO_9	1275.47	32.7739	305.015	292.971		43.6697	115.132	126.841	104.414	9.15464	398.234		171.414	17.8983	0.0986748	124.723	14.7483	34.6049	4.98768	22.6699	5.49452	1.89205	5.73805	0.820173	4.90756	0.84719	2.47769	0.306709
																				2022-08-25	G_BHVO_10	1234.64	32.8127	305.668	291.231		43.993	117.175	122.142	101.907	9.00196	399.385		166.844	18.4367	0.100824	130.349	15.1995	37.3364	5.20469	24.3254	6.16839	2.02519	6.20465	0.91989	5.3013	0.965107	2.51994	0.341805
																				2022-08-25	G_BHVO_11	1257.81	33.4827	305.684	296.96		43.5792	115.432	129.555	101.551	9.37349	390.101		167.252	18.6131	0.0999381	129.876	15.5192	38.0018	5.42046	24.1164	6.17494	2.1078	6.03625	0.950552	5.26846	0.978032	2.55309	0.356403
																				2022-08-25	G_BHVO_12	1260.59	33.275	306.663	295.105		43.6953	116.418	126.241	102.294	9.18842	397.479		171.65	18.2906	0.100948	130.663	15.6213	37.5905	5.43608	24.1231	6.18689	2.06824	6.25745	0.930747	5.20343	0.988829	2.69487	0.339387
																				2022-08-25	G_BHVO_13	1260.66	32.4993	311.788	291.652		44.6901	116.18	127.253	101.041	9.288	399.538		170.855	18.1552	0.0987637	134.571	14.8454	37.982	5.36469	24.8339	6.09069	2.0632	6.31888	0.908853	5.29269	0.998629	2.50701	0.342994
																				2022-08-25	G_BHVO_14	1274.81	33.8358	312.258	297.669		44.3582	115.971	128.205	102.638	9.18307	401.026		170.807	18.5369	0.100868	132.228	15.6586	38.4253	5.43788	24.5792	6.18769	2.10175	6.26506	0.945187	5.3575	1.00316	2.58607	0.351659
																				2022-08-25	G_BHVO_15	1228.32	32.7887	306.654	287.885		43.7353	115.769	126.184	100.763	9.1721	384.996		168.428	18.4865	0.10535	129.47	15.177	37.4665	5.30845	24.5926	6.04571	2.11485	6.10568	0.916759	5.15523	0.971222	2.55657	0.336332
																				2022-08-25	G_BHVO_16	1206.35	33.3266	301.803	291.79		44.1609	113.977	125.912	100.867	9.20723	387.673		167.862	18.0731	0.0943836	130.806	15.1955	37.3747	5.35249	24.7383	6.04432	2.05131	6.12774	0.89861	5.20812	0.986024	2.55038	0.347784
																				2022-08-25	G_BHVO_17	1332.72	32.521	309.729	294.329		43.9054	117.568	127.344	102.304	9.22153	403.339		171.377	18.3238	0.101196	129.848	15.2987	37.0423	5.342	23.882	5.84535	1.90695	5.98679	0.818729	5.14579	0.898949	2.42927	0.311187
																				2020-02-10	BHVO-1	1160.11	31.4694	324.063	282.414		42.9228	119.189	126.415	119.125	9.32951	395.061		161.975	16.4863	0.096904	129.703	14.0249	34.693	4.82928	23.3352	6.03546	1.91638	6.04671	0.811811	4.93817	0.887497	2.35501	0.285281
																				2020-02-10	BHVO-9	1200.73	31.6467	326.703	283.487		42.7807	119.67	125.602	115.625	9.22559	391.358		162.852	16.6205	0.0907243	131.375	14.2941	35.1705	4.84996	23.5039	6.02105	1.87709	6.25756	0.828361	5.01103	0.90961	2.38646	0.304894
																				2020-02-10	BHVO-2	1157.2	32.1718	328.723	285.341		43.4645	120.767	126.088	116.908	9.12137	390.747		164.225	16.697	0.0895633	129.593	14.2568	34.7193	4.78812	23.3179	5.93727	1.86168	6.09388	0.838537	5.39914	0.899314	2.42551	0.313106
																				2020-02-10	BHVO-3	1217.29	31.8189	326.348	282.681		43.6577	118.905	124.503	114.207	9.11836	385.847		162.579	16.6153	0.088955	129.909	14.225	34.7215	4.7871	23.4371	6.00064	1.88111	6.20644	0.82989	5.21644	0.903929	2.41815	0.298733
																				2020-02-10	BHVO-4	1084.05	31.16	323.608	281.337		42.368	118.136	122.76	110.636	9.19181	391.991		157.991	16.3317	0.0935328	130.359	13.9868	34.5287	4.73771	22.8173	5.86708	1.87731	5.92751	0.807145	4.89856	0.873869	2.27557	0.28923
																				2020-02-10	BHVO-5	1091.52	31.3735	320.428	278.376		42.0649	115.834	121.221	110.371	8.89511	385.175		158.534	16.242	0.0865159	130.823	14.0625	34.2102	4.7426	23.3171	5.83086	1.85857	6.03226	0.811446	4.96315	0.886914	2.34624	0.291164
																				2020-02-10	BHVO-6	1105.27	30.899	329.475	288.165		42.2322	121.115	124.477	110.837	8.99985	395.644		158.376	16.7306	0.0882581	129.484	13.965	35.2725	4.78718	22.8533	5.89365	1.88339	5.92816	0.79997	5.18459	0.872343	2.26052	0.294911
																				2020-02-10	BHVO-7	1100.42	31.3349	326.46	281.778		43.056	118.765	122.293	110.78	8.97167	393.312		158.283	16.5216	0.0867544	131.281	14.0148	34.4926	4.7504	23.0246	5.93791	1.89186	5.93188	0.793251	5.10478	0.856194	2.28703	0.290148
																				2020-02-10	BHVO-8	1110.79	31.1557	328.775	278.656		43.035	119.165	123.98	112.582	9.12969	388.593		158.243	16.2139	0.0931287	131.946	14.061	34.6018	4.67684	23.1401	5.88554	1.86517	5.89668	0.801383	4.92534	0.868448	2.31091	0.289054
																				2020-02-10	BHVO-10	1075.42	30.4569	325.336	281.621		42.4773	119.346	123.064	114.116	8.84108	386.673		153.607	16.0623	0.0887126	129.872	13.6287	34.6853	4.70511	22.7268	5.72018	1.85073	5.88276	0.769425	4.67013	0.862453	2.30685	0.281065
																				2022-08-25	G_BCR2G_1	1808.57	33.5912	417.867	18.4219		36.7073	11.0594	17.5715	127.213	47.0964	335.349		178.677	12.3035	1.17059	659.585	24.1479	52.1808	6.6228	27.5171	6.49809	1.85958	6.4364	0.95755	5.9315	1.18189	3.3128	0.490995
																				2022-08-25	G_BCR2G_2	1924.36	34.1775	412.795	18.3836		37.8671	11.4405	17.6293	136.386	48.4306	341.141		188.933	12.9499	1.23565	691.361	25.4464	54.0678	6.91102	29.653	6.69132	1.97466	6.76335	1.0306	6.23888	1.29984	3.75121	0.515732
																				2022-08-25	G_BCR2G_3	1735.67	33.6605	416.829	17.4324		37.6862	11.6066	17.3647	139.733	47.0655	338.029		180.895	12.6104	1.19157	672.78	24.9928	52.2094	6.92201	28.2255	6.51733	1.93956	6.54758	0.990491	6.20427	1.24694	3.64409	0.509297
																				2022-08-25	G_BCR2G_4	1795.94	34.2353	418.73	17.9661		38.2483	11.734	18.0881	140.261	47.9239	340.317		183.536	12.793	1.22107	677.648	26.0372	53.0785	7.1627	29.0438	6.55945	2.00046	6.67875	1.06027	6.21618	1.30595	3.7103	0.528389
																				2022-08-25	G_BCR2G_5	1705.28	33.7575	413.416	17.1168		38.3324	12.0642	17.9583	139.324	47.1229	345.042		186.454	12.406	1.17924	669.334	25.1486	52.5847	6.80619	28.17	6.48324	1.82348	6.31886	0.949578	5.82088	1.16083	3.47612	0.497464
																				2022-08-25	G_BCR2G_6	1781.31	34.6942	407.01	18.0363		38.1763	11.8806	17.7959	140.939	47.9787	338.122		187.353	12.4322	1.13549	668.514	26.0572	52.8523	6.94277	28.8586	6.67371	1.98223	6.54104	1.04528	6.3045	1.29102	3.81595	0.527215
																				2022-08-25	G_BCR2G_7	1756.04	35.0529	411.964	17.4169		37.8271	11.9855	18.4481	145.103	48.4717	354.206		189.957	12.5285	1.21125	683.756	25.862	53.4963	7.05205	28.6146	6.64904	1.88061	6.37758	0.967691	6.24744	1.18683	3.54587	0.488152
																				2022-08-25	G_BCR2G_8	1582.8	33.0899	418.183	17.0313		37.8168	11.8229	18.1693	136.097	48.5812	327.529		177.527	12.5701	1.17824	662.079	25.106	52.4019	6.87871	28.4506	6.66974	1.92452	6.65853	1.02672	6.3843	1.29292	3.70698	0.522091
																				2022-08-25	G_BCR2G_9	1722.05	34.0359	405.891	17.9885		37.0448	11.5439	17.6331	137.613	47.3893	338.73		179.022	13.1439	1.17556	668.7	25.1117	53.3072	6.8377	28.5375	6.54739	1.99798	6.44301	1.03583	6.30225	1.25304	3.8565	0.520399
																				2022-08-25	G_BCR2G_10	1634.21	34.2876	394.447	17.4349		38.3506	11.3879	18.1941	138.157	48.0652	336.779		182.471	12.5848	1.21003	670.931	25.9391	52.116	6.86993	28.7354	6.58579	1.94644	6.57947	0.981885	6.38286	1.26172	3.88702	0.513153
																				2022-08-25	G_BCR2G_11	1730.82	34.2937	406.794	17.3246		37.7932	11.4721	17.7392	138.865	47.3466	337.19		183.523	12.6193	1.17704	692.382	24.8043	55.1703	6.90781	28.717	6.58608	1.95825	6.60421	1.01918	6.27512	1.28299	3.66632	0.568106
																				2022-08-25	G_BCR2G_12	1621.9	33.8292	402.708	17.0909		37.3533	11.3925	17.7277	136.045	47.318	333.858		180.327	12.9904	1.16279	681.487	24.4388	53.4679	6.54402	29.3345	6.4042	2.07066	6.55087	1.0409	5.9541	1.30775	3.58253	0.547846
																				2022-08-25	G_BCR2G_13	1656.19	33.7881	405.17	17.1027		38.1043	12.0561	17.9589	139.866	47.837	339.199		182.357	12.737	1.15717	677.94	25.1146	54.6386	6.78137	28.2678	6.50856	1.89883	6.48228	0.973403	6.10358	1.20007	3.31437	0.486478
																				2022-08-25	G_BCR2G_14	1775.37	35.6554	400.044	17.2826		38.2661	11.9186	18.1893	138.827	48.6406	336.623		185.556	12.6552	1.14035	697.262	25.8293	54.5485	6.85886	29.8086	6.71093	1.96527	6.58095	1.04775	6.19717	1.22599	3.54207	0.503903
																				2022-08-25	G_BCR2G_15	1625.79	34.3489	400.175	17.5546		37.0825	11.8491	17.3317	138.703	47.5591	332.588		186.516	12.4361	1.1584	668.014	24.9927	53.5485	6.79366	28.8282	6.57718	1.92771	6.71578	1.04582	6.2584	1.28093	3.44941	0.515692
																				2022-08-25	G_BCR2G_16	1813.76	34.5292	412.696	17.7253		37.7592	12.1064	17.8744	140.109	48.9945	337.768		182.062	12.4682	1.21433	675.851	25.3955	53.1184	6.92473	28.5825	6.71719	2.00999	6.49759	1.03256	6.22251	1.24	3.52544	0.522589
																				2022-08-25	G_BCR2G_17	1711.22	34.737	402.673	17.4513		38.6849	11.8096	18.3685	140.156	49.6007	335.03		183.964	12.7426	1.20238	708.35	25.2546	54.6679	6.7717	30.2677	6.49223	1.91856	6.68987	1.04459	6.58603	1.27189	3.5952	0.548423
																						P	Sc	V	Cr	Mn	Co	Ni	Cu	Zn	Rb	Sr	Y	Zr	Nb	Cs	Ba	La	Ce	Pr	Nd	Sm	Eu	Gd	Tb	Dy	Ho	Er	Tm
																			NIST-612	Sd dev		4.04975	1.07655	0.976393	1.47687	0.798364	1.24693	0.814269	1.89766	1.64531	1.14006	2.1164	2.32068	1.47227	1.16258	2.84271	0.922368	1.53148	2.09405	2.29435	1.39064	1.30761	1.61959	1.63389	2.3061	1.86703	2.11365	2.18392	2.73674
																				% RSD		8.81693	2.68406	2.57706	3.94586	2.09651	3.4949	2.07	4.60819	4.40313	3.52519	2.70417	5.71576	3.72336	2.97755	6.58386	2.30916	4.20951	5.35717	5.90753	3.81277	3.40462	4.60825	4.2142	6.10353	5.13632	5.57449	5.65362	7.22549
																				Mean		45.9315	40.1089	37.8878	37.4282	38.0805	35.6786	39.3366	41.1803	37.3667	32.3405	78.2643	40.6015	39.5414	39.0449	43.1769	39.9439	36.3814	39.0888	38.8378	36.4731	38.407	35.1454	38.771	37.7831	36.3495	37.9165	38.6287	37.8762
																				certified values		46.6	39.9	38.8	36.4	38.7	35.5	38.8	37.8	39.1	31.4	78.4	38.3	37.9	38.9	42.7	39.3	36	38.4	37.9	35.5	37.7	35.6	37.3	37.6	35.5	38.3	38	36.8
																				2 se		0.694526	0.184627	0.16745	0.253281	0.136918	0.213847	0.139646	0.325447	0.282168	0.195519	0.362959	0.397994	0.252492	0.199381	0.48752	0.158185	0.262646	0.359127	0.393478	0.238492	0.224253	0.277757	0.280209	0.395493	0.320193	0.362489	0.374539	0.469347
																						P	Sc	V	Cr	Mn	Co	Ni	Cu	Zn	Rb	Sr	Y	Zr	Nb	Cs	Ba	La	Ce	Pr	Nd	Sm	Eu	Gd	Tb	Dy	Ho	Er	Tm
																			NIST-610	Sd dev		37.3237	38.0737	68.6724	51.9007	59.7906	59.2598	26.6731	39.785	22.8523	60.6693	36.7263	34.4549	22.5215	34.623	54.5719	7.47559	24.1643	42.21	30.3751	6.06959	6.84567	26.838	8.36594	35.8205	8.21148	36.1309	16.2238	32.0016
																				% RSD		9.70776	7.92803	13.6705	11.5786	12.2027	13.0183	5.59295	8.4739	4.86446	12.8368	6.77185	7.11136	4.86868	7.03923	13.376	1.66577	5.28334	8.68911	6.46142	1.41325	1.50827	5.74281	1.86132	7.75437	1.89544	7.66064	3.48031	7.00086
																				Mean		384.473	480.242	502.338	448.246	489.977	455.205	476.906	469.5	469.78	472.618	542.338	484.505	462.578	491.857	407.982	448.776	457.367	485.78	470.1	429.477	453.876	467.332	449.463	461.939	433.223	471.644	466.159	457.11
																				certified values		413	455	450	408	444	410	458.7	441	460	425.7	515.5	462	448	465	366	452	440	453	448	430	453	447	449	437	437	449	455	435
																				2 se		9.33094	9.51843	17.1681	12.9752	14.9477	14.815	6.66828	9.94625	5.71307	15.1673	9.18158	8.61374	5.63037	8.65574	13.643	1.8689	6.04107	10.5525	7.59378	1.5174	1.71142	6.7095	2.09148	8.95511	2.05287	9.03273	4.05594	8.0004
																						P	Sc	V	Cr	Mn	Co	Ni	Cu	Zn	Rb	Sr	Y	Zr	Nb	Cs	Ba	La	Ce	Pr	Nd	Sm	Eu	Gd	Tb	Dy	Ho	Er	Tm
																			AGV2	Sd dev		97.0312	0.287973	2.7615	1.02902	#DIV/0!	0.368871	0.460631	1.56377	3.06438	1.74373	11.8878	#DIV/0!	5.68783	0.471255	0.0366907	35.381	1.30333	2.24857	0.273089	1.32335	0.247668	0.0650593	0.19351	0.0320425	0.219625	0.027737	0.0897584	0.0140385
																				% RSD		3.90578	2.21264	2.37061	5.631	#DIV/0!	2.21477	2.38348	2.88431	3.15053	2.40207	1.82818	#DIV/0!	2.57661	3.18968	2.92491	3.10743	3.54367	3.2084	3.39191	4.48078	4.69145	4.30876	4.52024	5.5324	6.72192	4.49679	5.19861	5.76932
																				Mean		2484.3	13.0149	116.489	18.2741	#DIV/0!	16.6551	19.326	54.2164	97.2654	72.5929	650.254	#DIV/0!	220.749	14.7744	1.25442	1138.59	36.7792	70.0837	8.05118	29.5339	5.27913	1.50993	4.28098	0.579178	3.2673	0.616818	1.72659	0.24333
																				certified values		2100	13	120	17	0	16	19	53	86	68.6	658	0	230	15	1.16	1140	38	68	8.3	30	5.7	1.54	4.69	0.64	3.6	0.71	1.79	0.26
																				2 se		22.8705	0.0678759	0.650891	0.242542	#DIV/0!	0.0869437	0.108572	0.368584	0.722281	0.411002	2.80199	#DIV/0!	1.34063	0.111076	0.00864808	8.33937	0.307199	0.529992	0.0643677	0.311916	0.0583759	0.0153346	0.0456108	0.00755248	0.0517661	0.00653767	0.0211563	0.0033089
																						P	Sc	V	Cr	Mn	Co	Ni	Cu	Zn	Rb	Sr	Y	Zr	Nb	Cs	Ba	La	Ce	Pr	Nd	Sm	Eu	Gd	Tb	Dy	Ho	Er	Tm
																			BHVO2	Sd dev		74.8562	0.904989	9.22372	6.13233	#DIV/0!	0.682671	1.96969	2.15656	5.88343	0.136908	5.59045	#DIV/0!	5.30763	0.918136	0.00571913	1.75156	0.644231	1.44123	0.283576	0.746652	0.16844	0.0979634	0.161194	0.0557986	0.18134	0.0501704	0.116894	0.023727
																				% RSD		6.15316	2.78961	2.93276	2.11952	#DIV/0!	1.56683	1.68269	1.71392	5.54681	1.49545	1.41796	#DIV/0!	3.19986	5.20066	5.91331	1.34104	4.34037	3.9563	5.53211	3.12575	2.81176	4.94557	2.65708	6.41886	3.53656	5.38825	4.75394	7.39481
																				Mean		1216.55	32.4414	314.507	289.327	#DIV/0!	43.5703	117.056	125.826	106.069	9.15494	394.26	#DIV/0!	165.87	17.6542	0.0967162	130.612	14.8428	36.4287	5.126	23.8871	5.99056	1.98083	6.06657	0.869292	5.12758	0.931108	2.45888	0.32086
																				certified values		1266	33	308	293	0	44	116	127	102	9.2	396	0	170	18.3	0.1	131	15.2	37.6	5.35	24.5	6.1	2.07	6.16	0.92	5.28	0.98	2.56	0.34
																				2 se		14.1465	0.171027	1.74312	1.1589	#DIV/0!	0.129013	0.372236	0.407551	1.11186	0.0258731	1.0565	#DIV/0!	1.00305	0.173511	0.00108081	0.331013	0.121748	0.272366	0.0535908	0.141104	0.0318322	0.0185133	0.0304627	0.010545	0.03427	0.00948131	0.0220909	0.00448398
																						P	Sc	V	Cr	Mn	Co	Ni	Cu	Zn	Rb	Sr	Y	Zr	Nb	Cs	Ba	La	Ce	Pr	Nd	Sm	Eu	Gd	Tb	Dy	Ho	Er	Tm
																			BCR2	Sd dev		84.2021	0.59127	7.09634	0.428549	#DIV/0!	0.51485	0.285794	0.318996	3.48791	0.713049	5.45212	#DIV/0!	3.50283	0.219586	0.0278791	12.7156	0.530117	0.93225	0.138598	0.650257	0.0891871	0.0586758	0.118773	0.0350804	0.177215	0.0452484	0.164484	0.021567
																				% RSD		4.87193	1.72778	1.73645	2.43852	#DIV/0!	1.36098	2.43986	1.78361	2.51953	1.48657	1.61263	#DIV/0!	1.90912	1.73649	2.35545	1.87546	2.09738	1.74645	2.02093	2.25778	1.35529	3.01549	1.81144	3.45717	2.85208	3.61297	4.55543	4.16354
																				Mean		1728.31	34.2214	408.67	17.5742	#DIV/0!	37.8294	11.7135	17.8848	138.435	47.966	338.088	#DIV/0!	183.478	12.6454	1.1836	677.998	25.2752	53.3797	6.85812	28.8007	6.58068	1.94581	6.55683	1.01471	6.21353	1.25239	3.61072	0.517996
																				certified values		1615	33	425	17	0	38	13	21	125	47	342	0	184	12.5	1.16	683	24.7	53.3	6.7	28.9	6.59	1.97	6.71	1.02	6.44	1.27	3.7	0.51
																				2 se		20.422	0.143404	1.72112	0.103938	#DIV/0!	0.124869	0.0693153	0.077368	0.845943	0.17294	1.32233	#DIV/0!	0.849561	0.0532574	0.00676167	3.08398	0.128572	0.226104	0.0336149	0.15771	0.021631	0.014231	0.0288067	0.00850823	0.0429809	0.0109744	0.0398932	0.00523076
[truncated: 7 more columns]

## Sheet: Modal Mineralogy
Modal Mineral Proportions for Dadeville Samples.
Sample	Latitude	Longitude	OPX	CPX	Amph	Plag	Qtz	Gar	Ep	Serp	Other	Group
AL20-01	32.85	-85.17			70	20	10	<1				A
AL20-04	32.83	-85.34			60	40			<1			A
AL20-05	32.83	-85.34			70	30						A
AL20-06	32.83	-85.34			75	5			20			A
AL20-15	32.74	-85.76			65	30			5			B
AL20-19	32.93	-85.48			50	50						B
AL20-20	32.93	-85.48	10	80	<1	10						B
AL20-23	32.86	-85.66			45			<1	20	30		B
AL20-24	32.86	-85.66	90		10							B
AL20-26	32.86	-85.66	50	5	5	35		<1		5		B
AL20-27	32.86	-85.66	10	20	5	40		5		5		B
AL20-28	32.86	-85.66			40	40		20				B
AL20-29	32.85	-85.66	35		25	40						B
AL20-30	32.85	-85.65	15	15	30	40		<1				B
AL20-31	32.93	-85.63		25	25	50						B
AL20-32	32.9	-85.66	15	15	30	35					Olivine + Biotite	B
AL20-35	32.73	-85.77			60	35	<1	3			Clinozoisite	A
AL20-36	32.82	-85.65	30		30	40						B
AL20-37	32.81	-85.66	20	70	10							B
AL20-38	32.74	-85.48			50	20	15	10	<1	<1	Biotite	A
AL20-41	32.61	-85.69			55	35			10			A
AL20-43	32.78	-85.67			70	25			5			A
AL20-45	32.87	-85.64			60	40			<1			A
AL20-47	32.95	-85.18			50	50						A
AL22-04	32.93	-85.66			50	45			5			A
AL22-05	32.93	-85.66			55	45						A
AL22-07	32.94	-85.63			55	40			5			A
AL22-11	33.03	-85.14		5	65	5	5		20			A
AL22-14	32.73	-85.79			60	30	5		5			A
AL22-18	32.66	-85.66			60	30	10					A
AL22-21	32.7	-85.6			60	30	5		5			A
AL22-26	32.86	-85.66			70	30					Chlorite	A
AL22-27	32.77	-85.45			40	50	10					A
AL22-28	32.77	-85.45			50	35	15			<1		A
AL22-29	32.75	-85.4			40	20	20		20			A
AL22-30	32.78	-85.39		10	40	40	10					A
AL22-31	32.88	-85.35			45	40	15				Talc	A
AL22-32	32.81	-85.34		30	50	20						A
AL22-33	32.92	-85.16	5	10	30	55						A
AL22-34	33.08	-85.22			65	35						A
AL22-35	32.92	-85.32		10	60	30						A
OPX = orthopyroxene; CPX = clinopyroxene; Amph = amphibole; Plag = plagioclase; Qtz = quartz; Gar = garnet; Ep = epidote; Serp = serpentine.
Becker, N.A., George, F.R., Guice, G.L., Crowley, J.L., Nelson, W.R., Browning-Hanson, J.F., Roy, S., and Viete, D.R., 2023, Subduction initiation recorded in the Dadeville Complex of Alabama and Georgia, southeastern United States: Geosphere, v. 19, https://doi.org/10.1130/GES02643.1.

## Sheet: U-Th-Pb LA-ICP-MS
LA-ICP-MS U-Th-Pb data
Unknowns
30th January 2023, Department of Earth Science, Johns Hopkins University							Data for Tera-Wasserburg plot							Data for Wetherill plot									Dates										Sample statistics
Identifier	Comments	f206c	Uppm	Th/U	206Pb/204Pb	2SE%	238U/206Pb	2SE	207Pb/206Pb	2SE	208Pb/206Pb	2SE%	207Pb/235U	2SE	206Pb/238U	2SE	Rho	208Pb/232Th	2SE	207Pb/206Pb	2S	2Ssys	206Pb/238U	2S	2Ssys	207Pb/235U	2S	2Ssys	208Pb/232Th	2S	2Ssys	% conc	Outlier (x)	Mean	MSWD	p(x^2)	n
																					abs	abs		abs	abs		abs	abs		abs	abs
AL20-35_2		NA	255.208	0.227513	NA	NA	13.3652	0.2358	0.0601227	0.0029513	NA	NA	0.617705	0.0325991	0.0749589	0.00130093	0.513766	0.0242362	0.00121063	586.078	105.256	114.6	465.934	7.80437	11.9	487.188	20.46	21.9	483.941	23.8699		79.5003		454.76±3.55	1.1	0.33	(13/13)
AL20-35_3		NA	333.642	0.325962	NA	NA	13.8477	0.288749	0.0595157	0.00267993	NA	NA	0.596922	0.0398892	0.0724086	0.00149371	0.685626	0.0245861	0.000858456	566.313	97.9763	106.9	450.611	8.98062	12.5	473.385	21.46	26.5	490.884	16.9316		79.5693
AL20-35_4		NA	447.837	0.224216	NA	NA	13.5061	0.316477	0.0588544	0.00266397	NA	NA	0.600771	0.0312239	0.0742747	0.00166685	0.549245	0.0231623	0.000846356	540.682	106.221	107.9	461.812	10.0152	13.4	476.565	22.46	21.2	462.781	16.7246		85.4128
AL20-35_5		NA	226.019	0.212416	NA	NA	13.7732	0.329122	0.0587328	0.00267835	NA	NA	0.595817	0.0328701	0.0728743	0.00181094	0.431188	0.0227096	0.00104372	536.74	99.9857	108.6	453.392	10.8623	14	473.236	23.46	22.2	453.812	20.6192		84.4714
AL20-35_6		NA	147.221	0.228069	NA	NA	13.4447	0.353679	0.0595373	0.0042011	NA	NA	0.609611	0.0397957	0.0747048	0.00198673	0.285203	0.0241006	0.00181039	539.674	153.986	159.2	464.369	11.9096	14.9	481.402	24.46	26.3	481.152	35.7472		86.0463
AL20-35_7.1		NA	254.937	0.365237	NA	NA	13.7808	0.181544	0.0582853	0.00315266	NA	NA	0.58493	0.0383242	0.0726398	0.000952446	0.320455	0.0230868	0.00102494	513.634	117.473	126.1	452.025	5.72449	10.4	465.867	25.46	25.7	461.269	20.2399		88.0052
AL20-35_7.2		NA	201.242	0.289675	NA	NA	13.6863	0.334425	0.0607414	0.00358493	NA	NA	0.611915	0.0373716	0.0733385	0.00179149	0.146547	0.0239371	0.00116231	597.735	126.068	134.3	456.182	10.7575	13.9	483.087	26.46	24.8	478.042	22.9369		76.3184
AL20-35_8.1		NA	145.914	0.237889	NA	NA	14.0114	0.40648	0.0595836	0.00331894	NA	NA	0.589544	0.0351862	0.0717504	0.0021029	0.574151	0.0234181	0.00186699	557.363	125.952	128.4	446.615	12.6403	15.3	469.063	27.46	23.7	467.665	36.8482		80.13
AL20-35_8.2		NA	198.366	0.217468	NA	NA	13.7489	0.320971	0.0583235	0.00407977	NA	NA	0.585557	0.0475096	0.0729816	0.00170704	0.30691	0.0229947	0.00137462	491.727	163.518	159.1	454.043	10.2526	13.5	465.243	28.46	31.3	459.398	27.1253		92.3365
AL20-35_8.3		NA	155.353	0.230976	NA	NA	13.7373	0.317767	0.0586744	0.00356535	NA	NA	0.588531	0.0388811	0.07303	0.00169982	0.281429	0.0234481	0.00124994	519.039	139.979	139.6	454.336	10.2077	13.5	468.079	29.46	26	468.377	24.6895		87.5342
AL20-35_9		NA	229.944	0.21008	NA	NA	13.544	0.241673	0.0590892	0.00304876	NA	NA	0.602161	0.0364316	0.0739708	0.00128529	0.475365	0.022208	0.00119312	546.959	107.816	120.4	460.007	7.72034	11.8	477.052	30.46	24.3	443.879	23.5828		84.1025
AL20-35_10.1		NA	271.745	0.352265	NA	NA	13.8187	0.293519	0.0586388	0.00308771	NA	NA	0.596105	0.0326977	0.072565	0.00150715	0.64006	0.0234621	0.00116811	525.171	121.277	122.9	451.551	9.06224	12.6	473.433	31.46	22.1	468.662	23.0633		85.9817
AL20-35_10.2		NA	315.711	0.389113	NA	NA	14.0869	0.256618	0.0588027	0.00315578	NA	NA	0.574875	0.0306369	0.0711313	0.00126122	0.229241	0.0228824	0.00102399	572.482	96.166	124.9	442.94	7.5961	11.4	459.931	32.46	21.1	457.229	20.2383		77.3719
AL22-14_1		NA	1565.97	0.339262	NA	NA	15.4941	1.73616	0.0584772	0.00369323	NA	NA	0.524797	0.0309596	0.0646178	0.00719327	0.817442	0.0203542	0.00286171	545.624	136.281	144.7	403.634	43.5605	44.3	428.235	33.46	21.8	407.267	56.6822		73.9765	X	464.87±6.85	0.92	0.65	(55/56)
AL22-14_3		NA	2063.96	0.411512	NA	NA	14.8625	1.65404	0.0584643	0.00366884	NA	NA	0.550018	0.0312851	0.0673556	0.00749451	0.816812	0.0216576	0.00303863	545.535	138.194	143.9	420.19	45.2591	46	444.966	34.46	21.7	433.073	60.093		77.0235
AL22-14_4		NA	1210.97	0.291821	NA	NA	15.0251	1.67657	0.0581771	0.00367885	NA	NA	0.53803	0.0310422	0.0665958	0.00737826	0.598648	0.021184	0.0029676	534.27	139.024	145.2	415.606	44.6025	45.3	437.051	35.46	21.7	423.702	58.7366		77.7896
AL22-14_5		NA	956.62	0.266991	NA	NA	14.3053	1.62337	0.0583479	0.00374835	NA	NA	0.566783	0.0331358	0.069964	0.00776619	0.436294	0.022847	0.00324079	539.755	139.27	147.1	435.927	46.8212	47.5	455.824	36.46	22.7	456.579	64.05		80.7639
AL22-14_6		NA	2629.44	0.353836	NA	NA	14.7018	1.64092	0.0580295	0.00363611	NA	NA	0.548787	0.0323508	0.0681269	0.00761343	0.869144	0.0211671	0.00297991	529.296	135.987	144.1	424.84	45.9426	46.7	444.086	37.46	22.4	423.364	58.9929		80.2651
AL22-14_7		NA	3765.44	0.412461	NA	NA	14.7574	1.70647	0.0580431	0.00365211	NA	NA	0.546723	0.0319643	0.0678655	0.00757611	0.804669	0.0211794	0.00296937	529.57	137.673	144.6	423.264	45.7792	46.5	442.749	38.46	22.2	423.611	58.7689		79.9259
AL22-14_8		NA	1615.56	0.327163	NA	NA	14.393	1.61358	0.0581085	0.0036493	NA	NA	0.560689	0.0319456	0.0695128	0.007696	0.64646	0.0220661	0.00309202	532.141	137.904	144.3	433.213	46.4037	47.1	451.927	39.46	22	441.153	61.1408		81.4095
AL22-14_9		NA	2189.94	0.398244	NA	NA	14.7469	1.61592	0.0581249	0.00367129	NA	NA	0.547692	0.0311245	0.0678855	0.00755259	0.564094	0.0210612	0.00295984	532.368	139.74	145.1	423.39	45.5672	46.3	443.44	40.46	21.6	421.268	58.5984		79.5294
AL22-14_10		NA	1498.09	0.332831	NA	NA	14.1832	1.571	0.0580207	0.00367799	NA	NA	0.568377	0.0333271	0.0706083	0.00787725	0.738874	0.0220481	0.00309994	528.197	141.799	145.6	439.799	47.4167	48.2	456.85	41.46	22.8	440.795	61.2935		83.2641
AL22-14_11		NA	3860.86	0.352549	NA	NA	13.8311	1.55575	0.0575471	0.00359542	NA	NA	0.580366	0.0333912	0.0723618	0.00803471	0.704723	0.0221752	0.00311304	511.134	136.849	144.2	450.357	48.3179	49.1	464.626	42.46	22.7	443.308	61.5649		88.1094
AL22-14_12		NA	2821.93	0.593803	NA	NA	14.0656	1.58695	0.0577206	0.00363039	NA	NA	0.57025	0.0325047	0.0711588	0.00790127	0.672664	0.0210733	0.00295177	517.323	138.434	144.9	443.121	47.5742	48.3	458.124	43.46	22.3	421.511	58.4311		85.6565
AL22-14_13		NA	2898.15	0.710728	NA	NA	14.099	1.58961	0.0574286	0.00363175	NA	NA	0.565964	0.0328409	0.0710073	0.00790361	0.705931	0.0223075	0.0031732	505.928	137.265	145.9	442.206	47.5871	48.3	455.314	44.46	22.5	445.914	62.7159		87.4049
AL22-14_14		NA	1228	0.300531	NA	NA	14.0882	1.62494	0.0578877	0.00361855	NA	NA	0.571185	0.0325611	0.0710761	0.00791868	0.853081	0.0219419	0.00307855	524.035	137.56	143.9	442.617	47.7098	48.4	458.727	45.46	22.3	438.696	60.8827		84.4633
AL22-14_15		NA	5197.78	0.462647	NA	NA	13.8745	1.54026	0.0575416	0.00360467	NA	NA	0.576064	0.0327923	0.0721301	0.00800484	0.65254	0.0223683	0.00313812	510.765	139.058	144.5	448.965	48.1285	48.9	461.881	46.46	22.4	447.128	62.0364		87.9005
AL22-14_16		NA	1415.14	0.350959	NA	NA	13.8369	1.51455	0.0585849	0.00371473	NA	NA	0.588535	0.0344375	0.0723383	0.00803725	0.683653	0.0223288	0.00314767	549.361	140.739	145.2	450.214	48.2893	49.1	469.816	47.46	23.3	446.342	62.2097		81.9522
AL22-14_17		NA	1279.15	0.338206	NA	NA	14.0435	1.54637	0.0575899	0.00366358	NA	NA	0.569753	0.0335776	0.0712606	0.00790736	0.652094	0.0217849	0.0030726	511.718	141.075	146.5	443.735	47.5696	48.4	457.734	48.46	22.9	435.586	60.7831		86.7148
AL22-14_18		NA	1615.34	0.3429	NA	NA	13.6239	1.55233	0.0579515	0.0036274	NA	NA	0.591128	0.0337715	0.0734548	0.00814605	0.791354	0.0226542	0.00317315	526.377	136.082	144	456.925	48.9603	49.7	471.528	49.46	22.8	452.78	62.7144		86.8058
AL22-14_19		NA	1530.57	0.438246	NA	NA	13.4215	1.5002	0.0576451	0.00363013	NA	NA	0.59695	0.0345518	0.0745689	0.00827623	0.721288	0.0224331	0.00315006	514.383	137.823	145.1	463.611	49.6599	50.4	475.205	50.46	23.2	448.407	62.2851		90.1295
AL22-14_20		NA	1318.21	0.327667	NA	NA	13.4641	1.46865	0.0569039	0.00358364	NA	NA	0.586901	0.0335626	0.074296	0.00821441	0.46688	0.0224248	0.00314263	485.929	138.138	145.8	461.981	49.2673	50.1	468.828	51.46	22.8	448.245	62.1227		95.0716
AL22-14_21		NA	5886.3	0.845675	NA	NA	13.2212	1.45566	0.056711	0.00356516	NA	NA	0.596354	0.0348786	0.0757135	0.0084177	0.810448	0.0224005	0.00314762	478.492	137.451	145.8	470.47	50.4226	51.3	474.801	52.46	23.4	447.763	62.2277		98.3234
AL22-14_22		NA	4304.74	0.795866	NA	NA	13.3752	1.49097	0.0572085	0.00357818	NA	NA	0.59475	0.0342583	0.0748881	0.00836738	0.857468	0.0227247	0.00318635	498.05	139.269	144.6	465.512	50.1728	51	473.817	53.46	23.1	454.173	62.9806		93.467
AL22-14_23		NA	2038.73	0.394974	NA	NA	13.5207	1.52269	0.0570107	0.00360169	NA	NA	0.586543	0.0356947	0.0740852	0.00828493	0.872211	0.0227616	0.00320159	489.866	140.677	146.2	460.695	49.7282	50.5	468.453	54.46	24	454.899	63.2861		94.0453
AL22-14_24		NA	2859.2	0.660367	NA	NA	13.2451	1.46414	0.0571169	0.00359257	NA	NA	0.599151	0.0339638	0.0755587	0.00838375	0.545811	0.0225887	0.00316915	494.182	140.079	145.5	469.546	50.2377	51.1	476.652	55.46	22.9	451.484	62.6366		95.0148
AL22-14_25		NA	4739.26	0.676063	NA	NA	13.0819	1.53532	0.0566298	0.0035583	NA	NA	0.601858	0.0362093	0.0766448	0.00862549	0.966328	0.0246194	0.00404918	475.332	140.094	145.8	476.023	51.7103	52.5	478.221	56.46	24.2	491.367	80.0567		100.145
AL22-14_26		NA	2198.72	0.525065	NA	NA	13.0992	1.47103	0.0571544	0.00358901	NA	NA	0.606161	0.0345947	0.0764264	0.00850684	0.70378	0.023352	0.00327696	495.762	140.243	145.2	474.739	50.9559	51.8	481.08	57.46	23.2	466.565	64.7218		95.7594
AL22-14_27		NA	3006.88	0.759886	NA	NA	13.5303	1.47553	0.0572646	0.00359049	NA	NA	0.588135	0.0337244	0.0739532	0.00819454	0.757184	0.0219818	0.00308658	500.068	138.346	144.9	459.919	49.1573	50	469.608	58.46	22.8	439.484	61.0433		91.9714
AL22-14_28		NA	3648.61	0.258726	NA	NA	12.8699	1.42834	0.0573689	0.00358208	NA	NA	0.619461	0.0357238	0.0777932	0.00866495	0.878079	0.0271722	0.00393542	504.348	137.042	144.3	482.917	51.8171	52.7	489.427	59.46	23.7	541.834	77.2897		95.7508
AL22-14_29		NA	4904.99	0.381198	NA	NA	12.8613	1.39432	0.0563683	0.00354505	NA	NA	0.608545	0.034166	0.0777986	0.00862186	0.320601	0.0233984	0.00328262	465.066	141.691	146.2	482.959	51.5223	52.4	482.622	60.46	22.9	467.481	64.8262		103.847
AL22-14_30		NA	1314.35	0.331139	NA	NA	13.0472	1.45246	0.056597	0.00361647	NA	NA	0.599172	0.0338505	0.0766973	0.00850309	0.367486	0.023335	0.00327454	473.045	140.45	148.1	476.368	50.9146	51.7	476.673	61.46	22.8	466.229	64.6655		100.703
AL22-14_31		NA	1438.28	0.320348	NA	NA	13.2021	1.44123	0.057039	0.00359318	NA	NA	0.600787	0.0351939	0.0758536	0.00846225	0.771116	0.0231273	0.00324886	491.091	138.589	145.7	471.302	50.6576	51.5	477.612	62.46	23.6	462.126	64.1831		95.9704
AL22-14_32		NA	2572.35	0.660818	NA	NA	13.41	1.51039	0.0576416	0.00361879	NA	NA	0.597943	0.0354226	0.0746928	0.00834361	0.835757	0.0229119	0.00321757	514.423	138.474	144.7	464.342	50.056	50.8	475.779	63.46	23.8	457.87	63.5843		90.2646
AL22-14_33		NA	3904.9	0.543157	NA	NA	13.4289	1.4868	0.0575087	0.00361113	NA	NA	0.594809	0.0340529	0.0745095	0.00825547	0.645643	0.0225219	0.00315525	509.372	139.334	144.9	463.258	49.5253	50.3	473.872	64.46	23	450.165	62.3676		90.9469
AL22-14_34		NA	1536.78	0.357506	NA	NA	13.6753	1.53584	0.0578257	0.00363739	NA	NA	0.587554	0.0339683	0.073208	0.00814953	0.778403	0.0229901	0.00323932	521.362	137.216	144.8	455.437	48.9643	49.7	469.222	65.46	23	459.412	64.016		87.3552
AL22-14_35		NA	2099.79	0.496375	NA	NA	13.4984	1.49212	0.0569811	0.00355487	NA	NA	0.586612	0.0335037	0.0741242	0.0082093	0.824069	0.0223507	0.00313281	489.424	138.896	144.5	460.946	49.2639	50.1	468.643	66.46	22.7	446.781	61.9339		94.1815
AL22-14_36		NA	3140.95	0.71773	NA	NA	13.2283	1.50011	0.057132	0.00357765	NA	NA	0.600189	0.0345722	0.0756931	0.00843597	0.829168	0.0228903	0.00320975	495.073	137.375	144.9	470.344	50.5827	51.4	477.276	67.46	23.2	457.446	63.4194		95.0048
AL22-14_37		NA	700.356	0.234584	NA	NA	13.1846	1.54215	0.0577909	0.00366452	NA	NA	0.610332	0.0366821	0.0761014	0.00861154	0.832396	0.0215043	0.0030264	519.531	137.258	145.9	472.758	51.6412	52.4	483.579	68.46	24.4	430.037	59.8868		90.997
AL22-14_38		NA	2213.63	0.461689	NA	NA	12.9001	1.4294	0.0570943	0.00361357	NA	NA	0.614814	0.0355885	0.0775799	0.00861147	0.617619	0.0235168	0.00330635	492.988	141.199	146.3	481.648	51.5096	52.3	486.501	69.46	23.7	469.817	65.3099		97.6998
AL22-14_39		NA	3940.26	0.977308	NA	NA	13.6054	1.8495	0.0576175	0.00362144	NA	NA	0.593085	0.0395208	0.0741907	0.00870653	0.971431	0.0226705	0.00340738	513.448	136.864	144.9	461.229	52.4671	53	472.347	70.46	26.3	461.562	50.3184		89.8297
AL22-14_40		NA	2820.26	0.64772	NA	NA	12.8598	1.42307	0.0568778	0.00358045	NA	NA	0.614278	0.0352763	0.0777962	0.00860985	0.61258	0.0228565	0.00321441	484.929	139.43	145.8	482.948	51.4945	52.3	486.183	71.46	23.5	456.775	63.5237		99.5915
AL22-14_41		NA	1717.49	0.376803	NA	NA	13.0804	1.48221	0.0569528	0.00358781	NA	NA	0.604969	0.0344888	0.076504	0.00848198	0.588445	0.0243232	0.00342362	487.75	139.081	145.8	475.21	50.8294	51.6	480.325	72.46	23.1	485.735	67.5726		97.4291
AL22-14_42		NA	1768.47	0.518204	NA	NA	12.9964	1.42193	0.0568343	0.00360628	NA	NA	0.607221	0.0346602	0.0769814	0.00852246	0.373963	0.0235823	0.00331424	482.813	137.746	146.9	478.072	50.988	51.8	481.749	73.46	23.2	471.112	65.4451		99.018
AL22-14_43		NA	2835.58	0.71029	NA	NA	12.7831	1.41297	0.0564711	0.00359268	NA	NA	0.613958	0.035774	0.078299	0.00869631	0.574999	0.0233064	0.00327061	468.342	143.056	147.6	485.946	51.9779	52.8	485.942	74.46	23.8	465.664	64.6111		103.759
AL22-14_44		NA	1439.96	0.399503	NA	NA	12.8264	1.42416	0.0563566	0.00354272	NA	NA	0.610668	0.0351722	0.0780331	0.00866506	0.71291	0.0230646	0.0032345	464.618	138.221	146.1	484.357	51.8126	52.6	483.9	75.46	23.5	460.888	63.8919		104.248
AL22-14_45		NA	2702.3	0.637496	NA	NA	12.1082	1.35685	0.0561975	0.00352696	NA	NA	0.646411	0.0399758	0.0828323	0.0093528	0.961286	0.0286537	0.00422282	458.438	139.391	146.1	512.95	55.651	56.5	505.983	76.46	25.9	570.928	82.99		111.891
AL22-14_46		NA	3093.98	0.579643	NA	NA	12.5746	1.37733	0.0562406	0.00353724	NA	NA	0.621587	0.0358058	0.0795899	0.00883345	0.690614	0.0241169	0.00338871	460.017	138.585	146.3	493.66	52.7176	53.6	490.758	77.46	23.7	481.666	66.8678		107.313
AL22-14_47		NA	1422.06	0.339235	NA	NA	12.6053	1.37173	0.0548306	0.00347431	NA	NA	0.604594	0.0351357	0.0794119	0.00882905	0.667691	0.0246352	0.00345844	402.946	143.564	148.8	492.593	52.6819	53.6	480.042	78.46	23.5	491.893	68.2106		122.248
AL22-14_48		NA	1333.34	0.364164	NA	NA	12.2443	1.35208	0.0544685	0.00342958	NA	NA	0.618384	0.0358448	0.0817603	0.00909572	0.747686	0.0258023	0.00362434	388.497	141.921	148.3	506.601	54.1821	55.1	488.735	79.46	23.8	514.902	71.4447		130.4
AL22-14_53		NA	2826.74	0.709788	NA	NA	12.454	1.38115	0.0546006	0.00342331	NA	NA	0.611845	0.0357023	0.080323	0.00888009	0.852881	0.024217	0.00339742	394.195	141.62	147.6	498.044	52.994	53.8	484.609	80.46	23.8	483.644	67.018		126.345
AL22-14_54		NA	1610.52	0.41396	NA	NA	12.8499	1.42204	0.0546827	0.00342617	NA	NA	0.591508	0.0339757	0.0779024	0.00866159	0.76749	0.0246558	0.00346341	397.607	141.573	147.4	483.573	51.7887	52.6	471.758	81.46	23	492.298	68.3226		121.621
AL22-14_55		NA	2774.29	0.564424	NA	NA	12.7496	1.41104	0.0552858	0.00349287	NA	NA	0.602583	0.0345816	0.078504	0.0087187	0.665209	0.0245426	0.00344608	421.633	141.592	147.9	487.172	52.1049	53	478.8	82.46	23.2	490.067	67.9995		115.544
AL22-14_56		NA	1896.07	0.416615	NA	NA	12.7037	1.41113	0.0553425	0.00349361	NA	NA	0.6054	0.0349787	0.0787719	0.00873349	0.640939	0.0249959	0.00351248	424.001	138.44	147.7	488.776	52.1896	53	480.567	83.46	23.4	499.005	69.2804		115.277
AL22-14_57		NA	1332.27	0.333014	NA	NA	12.3801	1.4075	0.0548885	0.00348416	NA	NA	0.616009	0.0355887	0.0808147	0.00894466	0.496092	0.0257906	0.0036195	405.204	143.456	148.9	500.975	53.401	54.2	487.251	84.46	23.7	514.672	71.3316		123.635
AL22-14_58		NA	2698.01	0.750263	NA	NA	12.5018	1.39852	0.0545406	0.00343655	NA	NA	0.605894	0.0346856	0.0800324	0.00886504	0.570273	0.0245128	0.00343836	391.456	144.157	148.3	496.306	52.9283	53.8	480.904	85.46	23.2	489.48	67.8404		126.785
AL22-14_59		NA	1328.11	0.367133	NA	NA	12.3878	1.36549	0.0540723	0.00339855	NA	NA	0.606576	0.0348366	0.0807808	0.00895728	0.716261	0.0256069	0.00361022	372.183	143.226	148.5	500.769	53.4116	54.3	481.324	86.46	23.3	511.046	71.1423		134.549
AL22-14_60		NA	2234.01	0.497051	NA	NA	12.5797	1.38816	0.0543435	0.00341588	NA	NA	0.600244	0.0345132	0.0795249	0.00879648	0.668485	0.0246666	0.00345749	383.444	141.553	148.2	493.279	52.5208	53.4	477.313	87.46	23.2	492.514	68.1956		128.645
AL22-14_61		NA	1660	0.387573	NA	NA	12.5267	1.38532	0.0539902	0.00338752	NA	NA	0.59879	0.0339795	0.0798694	0.00884177	0.647574	0.0251466	0.00352726	368.891	140.255	148.3	495.335	52.7778	53.6	476.42	88.46	22.9	501.979	69.5636		134.277
AL22-34_1		NA	1527.24	1.20457	NA	NA	13.2015	1.43615	0.0532081	0.00334463	NA	NA	0.560073	0.0319943	0.0758087	0.00841296	0.672051	0.0237418	0.00332776	335.816	139.835	149.5	471.044	50.3729	51.2	451.518	89.46	22.1	474.264	65.7053		140.268		467.2±16.1	0.52	0.86	(10/10)
AL22-34_2		NA	588.853	1.07893	NA	NA	13.572	1.51619	0.053537	0.00342883	NA	NA	0.548788	0.0333175	0.0738087	0.00825227	0.701148	0.0230439	0.00323665	348.55	144.833	151.6	459.035	49.5339	50.3	444.013	90.46	23	460.479	63.9326		131.699
AL22-34_3		NA	172.311	0.53398	NA	NA	12.8628	1.42495	0.052766	0.00350557	NA	NA	0.569896	0.0343384	0.0778019	0.0086301	0.220965	0.0245621	0.00345867	313.099	152.729	157.7	482.976	51.6124	52.4	457.767	91.46	23.4	490.448	68.2448		154.257
AL22-34_4		NA	167.933	0.908235	NA	NA	13.2729	1.48528	0.0533615	0.00350139	NA	NA	0.55867	0.0333543	0.075422	0.00838737	0.365291	0.0239865	0.00336456	339.45	150.377	155.2	468.722	50.2854	51.1	450.506	92.46	22.9	479.093	66.4245		138.083
AL22-34_5		NA	237.532	0.768631	NA	NA	13.0387	1.482	0.0532497	0.00343058	NA	NA	0.567634	0.0338927	0.0767488	0.00850886	0.608776	0.0236336	0.00331995	335.993	145.649	152.8	476.676	50.9849	51.8	456.326	93.46	23.2	472.125	65.5534		141.871
AL22-34_6		NA	264.974	0.66818	NA	NA	12.8816	1.40999	0.053057	0.0035128	NA	NA	0.572365	0.0345032	0.0777158	0.00864673	0.331113	0.024273	0.00341189	325.994	147.828	156.9	482.455	51.687	52.5	459.361	94.46	23.5	484.746	67.3494		147.995
AL22-34_7		NA	244.717	0.728279	NA	NA	13.6377	1.53154	0.0527294	0.00344637	NA	NA	0.536929	0.0313755	0.0734054	0.00816754	0.193091	0.0234758	0.00329514	312.972	145.583	155.4	456.623	49.0634	49.8	436.303	95.46	21.9	469.01	65.0804		145.899
AL22-34_8		NA	170.421	0.352197	NA	NA	13.393	1.50177	0.0525696	0.00345037	NA	NA	0.547962	0.0373762	0.0750291	0.00860254	0.821524	0.0239817	0.00336425	305.478	150.65	156.2	466.306	51.5343	52.4	443.164	96.46	25.5	478.999	66.4045		152.648
AL22-34_9		NA	655.63	1.11156	NA	NA	14.5523	1.62365	0.0520554	0.00328909	NA	NA	0.49707	0.0286878	0.0687614	0.00762017	0.606133	0.0217996	0.003056	285.617	143.325	151.5	428.681	45.9703	46.7	409.651	97.46	20.6	435.882	60.4476		150.089
AL22-34_10		NA	261.987	0.796076	NA	NA	12.6471	1.43058	0.0522365	0.00352453	NA	NA	0.573735	0.0349766	0.07913	0.0087774	0.21571	0.0241319	0.00339412	289.227	150.037	160.6	490.915	52.4678	53.3	460.219	98.46	23.8	481.96	66.9955		169.733
Reference materials
Temora 1		NA	296.65	0.75554	NA	NA	14.6771	0.252987	0.0568717	0.00254965	NA	NA	0.531062	0.0349766	0.0682537	0.00116616	0.144197	0.0219104	0.000578559	466.791	100.917	108.37	425.603	7.03878	10.83	431.614	98.46	24.24	438.056	11.4431		91.1764		419.29±6.55	2.1	0.13	(3/3)
Temora 2		NA	291.72	0.763364	NA	NA	14.8557	0.291243	0.0588557	0.00220896	NA	NA	0.546131	0.0349766	0.0674674	0.00125204	0.708807	0.0217408	0.000564868	547.939	80.4622	92.69	420.852	7.57257	11.12	441.664	99.46	24.06	434.703	11.1743		76.8063
Temora 3		NA	359.981	0.858796	NA	NA	15.3063	0.363823	0.0600944	0.00178648	NA	NA	0.539439	0.0349766	0.0655592	0.00153007	0.151496	0.0210519	0.000497559	597.652	65.6945	77.5	409.304	9.25899	12.19	437.467	100.46	24.14	421.074	9.84751		68.4853
FC1 1		NA	581.78	0.656109	NA	NA	5.75081	0.0937235	0.0796669	0.00173142	NA	NA	1.91522	0.0349766	0.174169	0.00275676	0.521374	0.0535258	0.00102285	1184.09	43.1538	58.33	1034.93	15.1626	24.39	1085.05	101.46	18.07	1053.86	19.6158		87.4026		1058.7±15.3|28.9	3.6	0.028	(3/3)
FC1 2		NA	571.735	0.663454	NA	NA	5.58065	0.109639	0.0791562	0.00118441	NA	NA	1.96194	0.0349766	0.17963	0.00358643	0.608689	0.0549848	0.00132209	1173.36	29.7048	49.42	1064.77	19.5704	27.74	1101.13	102.46	18.02	1081.79	25.3028		90.745
FC1 3		NA	538.24	0.70232	NA	NA	5.4765	0.107458	0.078204	0.00129956	NA	NA	1.97627	0.0349766	0.18304	0.00360625	0.631943	0.0549414	0.000992283	1148.98	32.7157	51.63	1083.37	19.6384	28	1105.15	103.46	18.01	1081	19.0059		94.2901
Ples 1		NA	1033.49	0.127235	NA	NA	19.2071	0.322513	0.0549851	0.00166476	NA	NA	0.394067	0.0349766	0.0521557	0.000874447	0.0372588	0.0159128	0.000649238	401.612	68.2938	81.15	327.729	5.35753	8.34	337.1	104.46	26.11	319.076	12.9237		81.6034		334.42±5.15	2.1	0.12	(3/3)
Ples 2		NA	999.556	0.127735	NA	NA	18.6587	0.403585	0.0565717	0.00184514	NA	NA	0.416531	0.0349766	0.0537379	0.00110963	0.251745	0.0170223	0.000516905	464.511	69.9922	84.63	337.408	6.79517	9.45	353.174	105.46	25.77	341.148	10.2734		72.6372
Ples 3		NA	948.187	0.12764	NA	NA	18.4108	0.289261	0.0550272	0.0016372	NA	NA	0.409512	0.0349766	0.0540849	0.00101789	0.297001	0.0170368	0.000943824	404.121	66.2499	80.15	339.534	6.23409	9.08	347.987	106.46	25.88	341.4	18.7413		84.018
G-TEMORA_0		NA	160.338	0.569459	NA	NA	17.246	1.9224	0.0565787	0.00373453	NA	NA	0.45573	0.0349766	0.0580423	0.00645129	0.204841	0.0184429	0.00260226	470.196	146.888	152.55	363.699	39.3073	39.94	381.184	107.46	25.21	369.37	51.6488		77.3505		416.0±15.2	1.8	0.074	(9/9)
G-TEMORA_1		NA	241.461	0.561272	NA	NA	16.0272	1.7919	0.0561565	0.00369297	NA	NA	0.486437	0.0349766	0.062435	0.00692211	0.0485824	0.0200022	0.00282358	453.979	148.177	152.47	390.41	42.0078	42.68	402.386	108.46	24.8	400.291	55.9609		85.9974
G-TEMORA_2		NA	169.317	0.587098	NA	NA	15.2097	1.70753	0.0562869	0.00373376	NA	NA	0.514293	0.0349766	0.0657783	0.0072793	0.441218	0.0209322	0.00294863	458.642	141.325	153.55	410.665	44.0471	44.74	421.125	109.46	24.45	418.712	58.3759		89.5394
G-TEMORA_3		NA	209.463	0.551781	NA	NA	14.6484	1.65317	0.0551009	0.00375088	NA	NA	0.522898	0.0349766	0.0683421	0.00760155	0.442458	0.0219877	0.00309977	409.213	151.255	158.55	426.145	45.8867	46.6	426.807	110.46	24.34	439.597	61.2991		104.138
G-TEMORA_4		NA	164.335	0.605856	NA	NA	15.2691	1.70624	0.0562336	0.00373618	NA	NA	0.511808	0.0349766	0.065606	0.00734157	0.44501	0.0198163	0.0028047	456.498	145.707	153.83	409.608	44.4054	45.12	419.49	111.46	24.48	396.605	55.5966		89.7281
G-TEMORA_5		NA	144.691	0.565808	NA	NA	14.3673	1.59176	0.0563098	0.00367721	NA	NA	0.544551	0.0349766	0.0696568	0.00772859	0.33815	0.0223963	0.00318582	460.404	143.612	151.34	434.077	46.5723	47.33	441.286	112.46	24.08	447.667	62.9443		94.2818
G-TEMORA_6		NA	108.756	0.528767	NA	NA	13.808	1.57189	0.0540917	0.00363495	NA	NA	0.544619	0.0349766	0.0724952	0.00805694	0.500598	0.0236808	0.00338189	368.211	159.199	157.82	451.156	48.462	49.21	441.187	113.46	24.08	473.038	66.7822		122.526
G-TEMORA_7		NA	132.111	0.429237	NA	NA	13.8507	1.53226	0.052363	0.00354795	NA	NA	0.524945	0.0349766	0.0722267	0.00798949	0.194012	0.0231531	0.00326274	294.554	154.706	161.11	449.551	48.0334	48.81	428.235	114.46	24.32	462.633	64.4522		152.621
G-TEMORA_8		NA	106.264	0.521444	NA	NA	14.1056	1.56177	0.0514393	0.00356818	NA	NA	0.506456	0.0349766	0.0709787	0.00790618	0.187083	0.0233947	0.00334127	251.507	168.623	165.85	442.032	47.5743	48.35	415.814	115.46	24.54	467.392	66.0059		175.754
G-PLES_0		NA	882.872	0.109196	NA	NA	22.0798	2.44784	0.0552595	0.00350322	NA	NA	0.347781	0.0349766	0.045307	0.00501012	0.672812	0.0149815	0.00210979	420.373	140.557	148.38	285.643	30.8989	31.4	302.996	116.46	26.87	300.561	42.0047		67.9498	X	338.6±13.1	0.97	0.45	(8/9)
G-PLES_1		NA	809.452	0.116796	NA	NA	20.1509	2.21143	0.0549635	0.00347814	NA	NA	0.382166	0.0349766	0.0496492	0.00549537	0.24128	0.0156558	0.0022098	408.471	141.858	148.45	312.364	33.7423	34.3	328.55	117.46	26.3	313.982	43.9865		76.4716
G-PLES_2		NA	791.409	0.116766	NA	NA	19.2404	2.16393	0.0540123	0.00342496	NA	NA	0.389873	0.0349766	0.0519925	0.00574936	0.616772	0.0161714	0.00227014	369.204	143.752	149.75	326.74	35.2445	35.8	334.226	118.46	26.18	324.242	45.1498		88.4986
G-PLES_3		NA	783.645	0.103975	NA	NA	18.6463	2.09029	0.0537017	0.00342238	NA	NA	0.400279	0.0349766	0.0536615	0.00594415	0.737444	0.0168952	0.00239471	355.814	143.771	150.78	336.957	36.3764	36.95	341.771	119.46	26.02	338.629	47.5951		94.7004
G-PLES_4		NA	791.409	0.115455	NA	NA	19.3268	2.23954	0.0538662	0.00341922	NA	NA	0.387462	0.0349766	0.051816	0.00577719	0.73544	0.0161905	0.00228282	362.958	144.181	150.05	325.65	35.4365	35.97	332.458	120.46	26.22	324.621	45.3959		89.7213
G-PLES_5		NA	758.812	0.113271	NA	NA	18.3787	2.06686	0.0530073	0.00332437	NA	NA	0.400607	0.0349766	0.0544373	0.00602628	0.729629	0.016368	0.00232049	327.404	141.391	149.38	341.703	36.8563	37.44	342.048	121.46	26.01	328.148	46.1434		104.367
G-PLES_6		NA	708.391	0.0977559	NA	NA	17.336	1.95171	0.0515653	0.00328173	NA	NA	0.413078	0.0349766	0.0577083	0.00638543	0.34801	0.0180452	0.00253784	263.574	143.989	153.1	361.669	38.9342	39.55	351.036	122.46	25.82	361.479	50.3874		137.217
G-PLES_7		NA	610.848	0.102691	NA	NA	17.3864	1.93726	0.0502703	0.00320121	NA	NA	0.401652	0.0349766	0.0575284	0.00635326	0.305258	0.0185903	0.00263489	204.69	148.901	154.82	360.575	38.7364	39.36	342.791	123.46	26	372.292	52.2559		176.157
G-PLES_8		NA	623.751	0.105004	NA	NA	17.5916	1.91156	0.0502374	0.00316825	NA	NA	0.396839	0.0349766	0.0568652	0.00628762	0.764479	0.0185005	0.00260915	203.846	144.747	153.5	356.53	38.3327	38.97	339.294	124.46	26.07	370.513	51.7684		174.902
G-FC1_0		NA	380.892	0.566672	NA	NA	6.23352	0.694599	0.0792804	0.00503107	NA	NA	1.76675	0.0349766	0.160503	0.0177667	0.371125	0.0491643	0.00691123	1177.08	125.267	131.58	959.54	98.7312	100.29	1033.15	125.46	18.25	970.039	133.181		81.5186	X	1130.1±41.3	0.83	0.56	(8/9)
G-FC1_1		NA	559.717	0.680253	NA	NA	5.67236	0.616976	0.0780315	0.00492392	NA	NA	1.91115	0.0349766	0.176397	0.019543	0.487099	0.0515601	0.00723658	1145.88	126.108	131.51	1047.22	106.934	108.82	1084.83	126.46	18.07	1016.15	139.064		91.3901
G-FC1_2		NA	241.417	0.570251	NA	NA	5.45416	0.608442	0.0777332	0.00492955	NA	NA	1.97992	0.0349766	0.183426	0.0202939	0.457796	0.0537643	0.0075355	1138.01	126.473	132.26	1085.63	110.611	112.34	1108.47	127.46	18	1058.48	144.594		95.3973
G-FC1_3		NA	274.422	0.599624	NA	NA	5.30472	0.580403	0.0764355	0.00485011	NA	NA	2.00163	0.0349766	0.188642	0.0209173	0.317751	0.0547088	0.00767557	1104.43	125.144	132.98	1113.96	113.313	115.27	1115.91	128.46	17.98	1076.58	147.086		100.863
G-FC1_4		NA	366.921	0.638074	NA	NA	5.304	0.589646	0.0774183	0.00487506	NA	NA	2.02749	0.0349766	0.18867	0.0209261	0.654135	0.054808	0.00767987	1130.34	124.962	131.57	1114.11	113.498	115.32	1124.54	129.46	17.96	1078.49	147.23		98.564
G-FC1_5		NA	306.363	0.657952	NA	NA	5.1216	0.566458	0.0764604	0.00480726	NA	NA	2.07413	0.0349766	0.195347	0.0216231	0.587626	0.0571986	0.00801952	1105.54	125.13	131.86	1150.23	116.591	118.5	1140.12	130.46	17.92	1124.24	153.296		104.043
G-FC1_6		NA	241.562	0.595537	NA	NA	4.93611	0.540727	0.0737807	0.0046695	NA	NA	2.0762	0.0349766	0.202652	0.0223995	0.309956	0.0618553	0.00865781	1033.51	126.127	134.09	1189.52	119.968	122.01	1140.8	131.46	17.92	1213.08	164.791		115.096
G-FC1_7		NA	443.273	0.631547	NA	NA	4.98018	0.563757	0.0725265	0.00456143	NA	NA	2.01918	0.0349766	0.200955	0.0222953	0.701981	0.0605151	0.00849084	999.083	128.117	134.03	1180.38	119.851	121.6	1121.76	132.46	17.97	1187.54	161.852		118.146
G-FC1_8		NA	281.728	0.579251	NA	NA	4.92971	0.544985	0.0718929	0.00451796	NA	NA	2.02581	0.0349766	0.202938	0.0224513	0.333652	0.0636916	0.00892062	981.29	126.445	134.3	1191.04	120.296	122.26	1124.1	133.46	17.96	1248	169.469		121.375
Data not corrected for common-Pb
Concordance (%conc) calculated as (206Pb-238U age / 207Pb-206Pb age)*100
Decay constants of Jaffey et al. (1971) used
NA=not available
Uncertainties quoted without components related to systematic error unless otherwise stated
Total systematic uncertainties (Ssys): 2.0%

## Sheet: U-Pb_CA-ID-TIMS
CA-TIMS zircon U-Pb isotopic data.
									Radiogenic Isotope Ratios									Isotopic Dates
	Th	206Pb*	mol %	Pb*	Pbc	Pb*	206Pb		208Pb	207Pb		207Pb		206Pb		corr.		207Pb		207Pb		206Pb			include in
Sample	U	x10-13 mol	206Pb*	(pg)	(pg)	Pbc	204Pb		206Pb	206Pb	% err	235U	% err	238U	% err	coef.		206Pb	±	235U	±	238U	±		weighted mean
(a)	(b)	(c)	(c)	(c)	(c)	(c)	(d)		(e)	(e)	(f)	(e)	(f)	(e)	(f)			(g)	(f)	(g)	(f)	(g)	(f)		or discordia?	Weighted Mean Calculations (95% conf. inter.)
AL20-35																										206Pb/238U ± random (+tracer) [+decay constant]				MSWD =	1.4751
z7	0.171136	1.94062	0.999047	44.4043	0.153642	289.012	18931.3		0.0536361	0.0564506	0.0707538	0.584982	0.133857	0.0751914	0.068903	0.957485		469.14	1.56626	467.658	0.501636	467.356	0.310627		x	467.066	± 0.13 (0.19) [0.52]			pof =	0.194179
z1	0.175779	3.85745	0.999474	88.3786	0.168383	524.867	34321.5		0.0550919	0.0564163	0.0643825	0.58434	0.1287	0.0751545	0.069144	0.966535		467.796	1.42555	467.247	0.481975	467.135	0.311571		x					n =	6
z2	0.193982	4.71827	0.99955	108.663	0.176472	615.752	40053.2		0.0607973	0.0564387	0.0632953	0.584554	0.127782	0.0751522	0.0688777	0.969666		468.672	1.40126	467.384	0.478647	467.121	0.310362		x
z6	0.216231	4.21293	0.999512	97.6366	0.170649	572.149	36985.2		0.0677708	0.0564471	0.0626763	0.58452	0.128154	0.0751366	0.0695986	0.972138		469.005	1.38748	467.362	0.480024	467.028	0.31355		x
z3	0.158093	1.00607	0.996467	22.9354	0.296004	77.4834	5107.44		0.0495496	0.0564685	0.107232	0.5846	0.166022	0.0751184	0.0762043	0.864495		469.841	2.37347	467.413	0.621921	466.919	0.343232		x
z5	0.156141	3.13788	0.999459	71.4909	0.140913	507.342	33362.3		0.0489379	0.0564185	0.0729477	0.583935	0.133585	0.0750994	0.069708	0.933498		467.882	1.61518	466.987	0.500051	466.805	0.313898		x
z8	0.188761	4.73181	0.999573	108.815	0.167586	649.31	42296.9		0.0591635	0.0564531	0.0655025	0.583604	0.128955	0.0750109	0.0693418	0.958943		469.237	1.44999	466.775	0.482546	466.274	0.311907
z4	0.158598	0.783631	0.997808	17.8661	0.142901	125.024	8229.32		0.0497133	0.0564092	0.107859	0.581382	0.163646	0.0747835	0.0726122	0.859319		467.513	2.38831	465.349	0.610887	464.91	0.325696
(a) z1, z2, etc. are labels for analyses composed of single zircon grains that were annealed and chemically abraded (Mattinson, 2005).
(b) Model Th/U ratio calculated from radiogenic 208Pb/206Pb ratio and 207Pb/235U date.
(c) Pb* and Pbc are radiogenic and common Pb, respectively. mol % 206Pb* is with respect to radiogenic and blank Pb.
(d) Measured ratio corrected for spike and fractionation only. Pb fractionation correction for analyses done with tracer solution BSU1B is 0.16 ± 0.03 (1 sigma) %/amu (atomic mass unit) for single-collector Daly analyses,
based on recent analyses of EARTHTIME 202Pb-205Pb ET2535 tracer solution.
(e) Corrected for fractionation and spike. Common Pb in zircon analyses is assigned to procedural blank with composition of 206Pb/204Pb = 18.04 ± 0.61%; 207Pb/204Pb = 15.54 ± 0.52%; 208Pb/204Pb = 37.69 ± 0.63% (1 sigma).
206Pb/238U and 207Pb/206Pb ratios corrected for initial disequilibrium in 230Th/238U using a D(Th/U) of 0.20 ± 0.05 (1 sigma).
(f) Errors are 2 sigma, propagated using algorithms of Schmitz and Schoene (2007) and Crowley et al. (2007).
(g) Calculations based on the decay constants of Jaffey et al. (1971). 206Pb/238U and 207Pb/206Pb dates corrected for initial disequilibrium in 230Th/238U using a D(Th/U) of 0.20 ± 0.05 (1 sigma).

## Sheet: Microprobe mineral analyses
Microprobe mineral major element analyses
Unknowns: Element Oxides (wt. %)
Comment		SiO2(Mass%)	TiO2(Mass%)	Al2O3(Mass%)	Cr2O3(Mass%)	FeO(Mass%)	MnO(Mass%)	MgO(Mass%)	CaO(Mass%)	Na2O(Mass%)	K2O(Mass%)	Total(Mass%)
AL20-06_BSE-1_amfed-cpx_1	Grain 1; core	49.5	0.244	4.368	0.054	11.122	0.372	10.501	22.902	0.557	0.021	99.641
AL20-06_BSE-1_amfed-cpx_2	Grain 1; core	49.541	0.277	4.347	-0.013	10.908	0.436	10.387	23.087	0.528	0.025	99.523
AL20-06_BSE-1_amfed-cpx_3	Grain 1; core	49.679	0.258	4.318	0.017	10.955	0.411	10.494	22.896	0.56	0.013	99.601
AL20-06_BSE-1_epidote_1	Grain 1	38.31	0.224	25.9	0.088	9.405	0.042	0.048	23.161	-0.005	0.015	97.188
AL20-06_BSE-1_epidote_2	Grain 1	38.172	0.174	26.042	0.086	9.32	0.061	0.048	23.236	-0.001	0.009	97.147
AL20-06_BSE-1_epidote_3	Grain 1	38.102	0.19	26.238	0.08	9.426	0.08	0.059	23.241	-0.007	0.004	97.413
AL20-06_BSE-1_epidote_4	Grain 1	38.163	0.169	25.997	0.103	9.197	0.029	0.061	23.278	-0.004	0.011	97.004
AL20-06_BSE-1_k-fel_1	Grain 1; rim	47.742	0.016	38.868	-0.005	0.266	0.019	0.463	0.487	0.112	8.152	96.12
AL20-06_BSE-1_k-fel_2	Grain 1; core	46.985	-0.007	38.387	0.006	0.213	0.026	0.447	0.38	0.206	8.715	95.358
AL20-06_BSE-1_plg1	Grain 1; rim	44.991	0.014	35.686	-0.009	0.184	0.018	0.003	18.329	0.843	0.016	100.075
AL20-06_BSE-1_plg2	Grain 1; core	45.123	-0.039	35.397	-0.015	0.119	-0.003	0.009	18.232	0.888	0.016	99.727
AL20-06_BSE-1_plg3	Grain 1; rim	44.851	-0.002	35.329	0.005	0.134	0.014	0.002	18.286	0.804	0.016	99.439
AL20-06_BSE-1_plg4	Grain 2; core	44.645	-0.042	35.327	-0.025	0.127	0.014	0	18.31	0.852	0.03	99.238
AL20-06_BSE-1_plg5	Grain 2; rim	44.944	0.023	35.72	0.023	0.175	0.001	-0.019	18.485	0.819	0.017	100.188
AL20-06_BSE-2_amfed-cpx_1	Grain 1; rim	49.391	0.276	4.33	0.021	11.198	0.412	10.473	22.632	0.575	0.017	99.325
AL20-06_BSE-2_amfed-cpx_2	Grain 1; core	49.453	0.283	4.301	0.023	11.072	0.368	10.306	22.98	0.553	0.011	99.35
AL20-06_BSE-2_amfed-cpx_3	Grain 1; core	49.077	0.256	4.344	0.069	11.341	0.438	10.199	22.877	0.535	-0.001	99.135
AL20-06_BSE-2_amfed-cpx_4	Grain 1; core	49.372	0.217	4.35	0.076	11.291	0.403	10.294	22.907	0.509	0.012	99.431
AL20-06_BSE-2_amfed-cpx_5	Grain 1; core	49.559	0.244	4.285	0.033	11.244	0.393	10.507	23.141	0.523	0.014	99.943
AL20-06_BSE-2_amfed-cpx_6	Grain 1; core	49.342	0.318	4.428	0.04	11.078	0.408	10.397	22.77	0.548	0.014	99.343
AL20-06_BSE-2_epidote_1	Grain 1	38.342	0.201	26.146	0.115	9.274	0.052	0.068	23.228	-0.01	0.02	97.436
AL20-06_BSE-2_epidote_2	Grain 2	38.255	0.258	26.005	0.08	9.298	0.047	0.058	23.162	-0.02	0.015	97.158
AL20-06_BSE-2_epidote_3	Grain 3	38.28	0.267	26.168	0.086	9.468	0.056	0.049	23.324	-0.004	0.012	97.706
AL20-06_BSE-2_k-fel_1	Grain 1; rim	46.415	0	37.924	-0.015	0.173	0.001	0.336	0.377	0.132	8.339	93.682
AL20-06_BSE-2_k-fel_2	Grain 1; core	46.774	-0.011	37.369	-0.004	0.271	0.013	0.318	0.293	0.239	9.192	94.454
AL20-06_BSE-2_k-fel_3	Grain 1; core	46.45	-0.016	37.877	-0.006	0.247	0.018	0.369	0.277	0.129	8.574	93.919
AL20-06_BSE-2_k-fel_4	Grain 1; rim	47.782	0.002	38.953	0.009	0.173	0.012	0.246	0.197	0.201	9.147	96.722
AL20-06_BSE-2_k-fel_5	–				ANALYSIS FAIL
AL20-06_BSE-2_plg_1	Plag within k-spar	44.81	-0.018	35.662	-0.04	0.154	0.004	-0.002	18.576	0.815	0.023	99.984
AL20-06_BSE-2_plg_2	Plag within k-spar	45.008	-0.005	35.271	0.001	0.145	-0.024	0.003	18.298	0.87	0.019	99.586
AL20-06_BSE-2_plg_3	Plag within k-spar	44.992	-0.014	35.442	-0.015	0.145	-0.002	0.006	18.137	0.89	0.018	99.599
AL20-06_BSE-2_plg_4	Plag within k-spar	45.165	0.044	35.611	-0.004	0.174	0.014	0.004	18.209	0.882	0.024	100.123
AL20-06_BSE-3_amfed-cpx_1	Grain 1	50.013	0.19	3.639	0.038	10.795	0.446	10.791	22.923	0.549	0.019	99.403
AL20-06_BSE-3_amfed-cpx_2	Grain 1	49.21	0.26	4.413	-0.005	11.428	0.416	10.278	22.91	0.543	0.012	99.465
AL20-06_BSE-3_amfed-cpx_3	Grain 1	49.244	0.222	4.388	0.067	11.44	0.407	10.203	23.004	0.558	0.014	99.547
AL20-06_BSE-3_amfed-cpx_4	Grain 1	49.459	0.276	4.376	0.005	11.358	0.462	10.169	22.913	0.53	0.007	99.555
AL20-06_BSE-3_amfed-cpx_5	Grain 1	49.618	0.244	4.034	0.045	11.512	0.469	10.486	22.843	0.567	0.014	99.832
AL20-06_BSE-3_amfed-cpx_6	Grain 1	50.379	0.224	3.282	0.071	10.699	0.432	11.003	23.025	0.564	0.009	99.688
AL20-06_BSE-3_amfed-cpx_7	Grain 2	49.446	0.272	4.464	0.036	11.343	0.415	10.251	22.909	0.599	0.018	99.753
AL20-06_BSE-3_amfed-cpx_8	Grain 2	49.458	0.251	4.339	-0.001	11.638	0.43	10.385	22.794	0.536	0.018	99.848
AL20-06_BSE-3_amfed-cpx_9	Grain 2	49.622	0.206	4.369	0.011	11.564	0.436	10.468	22.974	0.543	0.003	100.196
AL20-06_BSE-3_epidote_1	Grain 1	38.194	0.178	25.762	0.108	9.909	0.098	0.034	23.163	-0.009	0.011	97.448
AL20-06_BSE-3_epidote_2	Grain 1	38.236	0.181	26.037	0.069	9.575	0.038	0.052	23.218	0	0	97.406
AL20-06_BSE-3_epidote_3	Grain 1	38.225	0.197	25.872	0.07	9.724	0.066	0.066	23.204	0.01	0.004	97.438
AL20-06_BSE-3_epidote_4	Grain 1	38.352	0.252	26.108	0.102	9.257	0.064	0.082	23.211	-0.001	0.01	97.437
AL20-06_BSE-3_epidote_5	Grain 2	38.181	0.229	25.918	0.106	9.492	0.06	0.057	23.207	-0.005	0.017	97.262
AL20-06_BSE-3_epidote_6	Grain 2	38.205	0.2	25.904	0.094	9.275	0.039	0.054	23.245	-0.002	0.015	97.029
AL20-06_BSE-3_plg_1	Grain 1; rim	45.251	0.012	35.756	-0.006	0.167	-0.006	0	18.253	0.853	0.009	100.289
AL20-06_BSE-3_plg_2	Grain 1; core	45.465	-0.019	35.491	-0.004	0.157	-0.021	0.006	18.389	0.942	0.018	100.424
AL20-06_BSE-3_plg_3	Grain 1; rim	45.232	0.002	35.755	-0.029	0.062	-0.005	0	18.243	0.944	0.026	100.23
AL20-06_BSE-3_plg_4	Grain 2	45.272	0	35.62	-0.029	0.156	-0.021	0.003	18.147	0.927	0.037	100.112
AL20-06_BSE-3_plg_5	Grain 2	44.993	0.053	35.646	0.004	0.167	-0.009	0.001	18.236	0.852	0.018	99.961
AL20-06_BSE-3_plg_6	Grain 2	45.264	0.023	35.54	-0.02	0.184	-0.001	-0.004	18.359	0.915	0.013	100.273
AL20-06_BSE-3_plg_7	Grain 3; rim	44.855	0.012	35.523	0.003	0.184	0	0.005	18.213	0.847	0.017	99.659
AL20-06_BSE-3_plg_8	Grain 3; core	45.079	0.025	35.632	0.028	0.217	-0.004	0	18.317	0.862	0.02	100.176
AL20-06_BSE-4_amfed-cpx_1	Grain 1; rim	49.508	0.247	4.208	0.032	10.999	0.423	10.407	23.032	0.519	0.012	99.387
AL20-06_BSE-4_amfed-cpx_10	Grain 3; core	49.625	0.26	4.321	0.018	11.107	0.445	10.492	23.055	0.522	0.01	99.855
AL20-06_BSE-4_amfed-cpx_11	Grain 3; rim	49.415	0.326	4.237	0.062	10.962	0.478	10.488	23.008	0.528	0.011	99.515
AL20-06_BSE-4_amfed-cpx_2	Grain 1; core	49.42	0.204	4.211	0.033	11.167	0.413	10.356	22.977	0.515	0.018	99.314
AL20-06_BSE-4_amfed-cpx_3	Grain 1; rim	49.313	0.176	4.308	0.036	11.102	0.462	10.345	22.953	0.493	0.009	99.197
AL20-06_BSE-4_amfed-cpx_4	Grain 2	49.248	0.21	4.411	0.012	11.146	0.393	10.386	22.858	0.485	0.006	99.155
AL20-06_BSE-4_amfed-cpx_5	Grain 2	49.774	0.224	4.339	0.022	10.875	0.444	10.545	22.959	0.555	0.007	99.744
AL20-06_BSE-4_amfed-cpx_6	Grain 2	49.679	0.286	4.248	0.039	11.017	0.415	10.534	23.06	0.526	0.005	99.809
AL20-06_BSE-4_amfed-cpx_7	Grain 2	49.821	0.224	4.232	0.004	10.565	0.453	10.627	22.896	0.578	0.021	99.421
AL20-06_BSE-4_amfed-cpx_8	Grain 2	49.583	0.244	4.433	0.059	10.943	0.475	10.484	22.918	0.564	0.008	99.711
AL20-06_BSE-4_amfed-cpx_9	Grain 3; rim	49.598	0.219	4.323	0.064	11.019	0.421	10.608	23.379	0.498	0.023	100.152
AL20-06_BSE-4_epidote_1	Grain 1; rim	38.164	0.205	26.216	0.086	9.146	0.084	0.063	23.22	-0.003	0.009	97.19
AL20-06_BSE-4_epidote_2	Grain 1; core	38.353	0.292	26.266	0.071	9.005	0.054	0.073	23.253	-0.015	0.004	97.356
AL20-06_BSE-4_epidote_3	Grain 1; rim	38.314	0.253	26.124	0.061	9.253	0.017	0.057	23.276	0.013	0.017	97.385
AL20-06_BSE-4_plg-1	Grain 1; rim	45.034	0.012	35.58	0.018	0.099	0.024	0.001	18.223	0.908	0.017	99.916
AL20-06_BSE-4_plg-2	Grain 1; core	45.081	0.005	35.401	0.019	0.08	0.031	0.006	18.281	0.901	0.016	99.821
AL20-06_BSE-4_plg-3	Grain 1; rim	45.026	0.019	35.599	0.021	0.179	-0.002	-0.003	18.341	0.887	0.022	100.089
AL20-06_BSE-4_plg-4	Grain 2; rim	45.126	-0.014	35.659	-0.024	0.144	-0.002	-0.006	18.371	0.82	0.016	100.09
AL20-06_BSE-4_plg-5	Grain 2; core	45.156	0.007	35.616	-0.02	0.093	-0.006	0.002	18.347	0.852	0.022	100.069
AL20-06_BSE-4_plg-6	Grain 2; core	44.776	0.021	35.607	0.006	0.119	0.027	-0.007	18.237	0.876	0.026	99.688
AL20-06_BSE-4_plg-7	Grain 2; core	45.088	-0.039	35.459	-0.018	0.149	-0.015	-0.008	18.232	0.875	0.02	99.743
AL20-06_BSE-4_plg-8	Grain 3	45.082	0.005	35.544	-0.038	0.178	0.009	0.013	18.34	0.847	0.01	99.99
AL20-06_BSE-4_plg-9	Grain 3	44.883	0.005	35.578	-0.015	0.145	0.028	0.002	18.53	0.845	0.01	100.011
AL20-26_BSE-image1_amf_1	Grain 1	52.228	0.277	5.483	0.107	7.37	0.104	18.954	12.133	0.471	0.062	97.189
AL20-26_BSE-image1_amf_10	Alteration of opx/plag	51.433	0.219	6.976	0.074	7.466	0.092	18.319	11.982	0.555	0.024	97.14
AL20-26_BSE-image1_amf_2	Grain 1	52.007	0.254	5.405	0.09	7.315	0.11	18.848	11.949	0.442	0.037	96.457
AL20-26_BSE-image1_amf_3	Grain 1	51.759	0.332	5.923	0.125	7.615	0.114	18.715	12.076	0.513	0.067	97.239
AL20-26_BSE-image1_amf_4	Grain 1	50.719	0.384	6.827	0.175	7.832	0.096	17.825	11.948	0.618	0.072	96.496
AL20-26_BSE-image1_amf_5	Alteration of opx/cpx	50.618	0.349	7.174	0.058	8.489	0.106	17.689	11.816	0.598	0.044	96.941
AL20-26_BSE-image1_amf_6	Alteration of opx/cpx	49.933	0.29	8.376	0.053	8.479	0.104	17.133	12.071	0.699	0.023	97.161
AL20-26_BSE-image1_amf_7	Alteration of opx/plag	48.832	0.394	9.544	0.055	8.735	0.098	16.7	12.009	0.886	0.032	97.285
AL20-26_BSE-image1_amf_8	Alteration of opx/cpx	52.291	0.142	6.198	0.048	7.449	0.068	18.685	12.023	0.424	0.025	97.353
AL20-26_BSE-image1_amf_9	Alteration of opx/plag	49.036	0.294	9.633	0.042	7.907	0.056	17.099	12.061	0.882	0.038	97.048
AL20-26_BSE-image1_cpx_1	Grain 1; Relict core	52.506	0.24	2.067	0.05	5.714	0.14	15.435	23.045	0.138	0.016	99.351
AL20-26_BSE-image1_cpx_2	Grain 1; Relict core	52.851	0.155	1.669	0.138	5.772	0.196	15.612	23.217	0.109	0.013	99.732
AL20-26_BSE-image1_cpx_3	Grain 1; Relict core	52.557	0.238	2.308	0.193	6.155	0.173	15.466	22.784	0.164	0.014	100.052
AL20-26_BSE-image1_cpx_4	Grain 1; Relict core	52.675	0.222	2.087	0.08	6.057	0.18	15.415	22.997	0.139	0.015	99.867
AL20-26_BSE-image1_cpx_5	Grain 1; Relict core	52.61	0.259	1.98	0.083	5.772	0.197	15.294	22.957	0.141	0.011	99.304
AL20-26_BSE-image1_cpx_6	Grain 2; relict core	53.23	0.099	1.292	0.099	5.5	0.157	16.012	23.06	0.125	0.025	99.599
AL20-26_BSE-image1_cpx_7	Grain 2; relict core	52.503	0.309	2.092	0.073	6.191	0.173	15.957	22.126	0.108	0.013	99.545
AL20-26_BSE-image1_cpx_8	Grain 2; relict core	52.63	0.277	2.013	0.055	5.887	0.149	15.669	22.986	0.1	0.02	99.786
AL20-26_BSE-image1_cpx_9	Grain 2; relict core	52.864	0.245	2.264	0.084	5.473	0.14	15.559	23.409	0.123	0.021	100.182
AL20-26_BSE-image1_garnet_1	Within plag. grain 2	39.451	0.073	22.775	0.109	21.219	1.319	7.429	8.881	0.012	-0.003	101.265
AL20-26_BSE-image1_garnet_2	Between plag and ilmenite	39.312	0.031	22.757	0.088	21.123	1.237	8.009	8.15	0.009	0.021	100.737
AL20-26_BSE-image1_garnet_3	Between plag and ilmenite	39.426	0.071	22.825	0.036	21.531	1.284	8.03	7.583	-0.015	0.022	100.793
AL20-26_BSE-image1_garnet_4	Within plag. grain 2	39.397	0.02	22.678	0.095	21.312	1.333	7.425	8.49	-0.005	0.012	100.757
AL20-26_BSE-image1_plg_1	Grain 1	44.989	0.012	36.227	0.005	0.1	0.017	-0.006	19.033	0.582	-0.001	100.958
AL20-26_BSE-image1_plg_2	Grain 1	44.708	-0.002	36.406	-0.01	0.077	0	0.009	19.025	0.57	0.007	100.79
AL20-26_BSE-image1_plg_3	Grain 1	44.609	-0.005	36.118	0.033	0.073	0.018	-0.001	18.836	0.611	0.025	100.317
AL20-26_BSE-image1_plg_4	Grain 1	44.494	-0.007	35.991	-0.02	0.078	0.026	-0.002	18.79	0.573	0.02	99.943
AL20-26_BSE-image1_plg_5	Grain 1	43.972	-0.012	36.432	0.006	0.1	0.005	-0.002	19.231	0.388	0.02	100.14
AL20-26_BSE-image1_plg_6	Grain 2	43.703	0.019	36.431	0.008	0.126	0.004	-0.004	19.524	0.244	0.01	100.065
AL20-26_BSE-image1_plg_7	Grain 2	44.193	-0.002	36.396	0.004	0.079	0.019	0.006	19.261	0.386	0.011	100.353
AL20-26_BSE-image1_plg_8	Grain 2	44.741	-0.028	36.062	-0.009	0.083	0.043	0.007	18.91	0.646	0.01	100.465
AL20-26_BSE-image1_plg_9	Grain 2	44.82	0.016	36.248	-0.016	0.058	-0.005	0.002	19.091	0.583	0.021	100.818
AL20-26_BSE-image1_px_1	Grain 1; Relict core	53.507	0.093	1.464	0.041	19.276	0.39	25.042	0.314	0.001	0.008	100.136
AL20-26_BSE-image1_px_10	Grain 3; relict core	53.096	0.007	1.666	0.019	19.068	0.368	25.219	0.296	0	0.031	99.77
AL20-26_BSE-image1_px_2	Grain 1; Relict core	53.256	0.069	1.515	0.106	19.249	0.387	25.221	0.357	-0.005	0.011	100.166
AL20-26_BSE-image1_px_3	Grain 1; Relict core	53.201	0.124	1.399	0.119	19.049	0.436	25.213	0.469	0.01	0.025	100.045
AL20-26_BSE-image1_px_4	Grain 1; Relict core	53.472	0.04	1.297	0.038	18.879	0.382	24.664	1.359	0.016	0.02	100.167
AL20-26_BSE-image1_px_5	Grain 1; Relict core	53.226	0.102	1.435	0.061	19.38	0.425	24.692	0.726	0.009	0.014	100.07
AL20-26_BSE-image1_px_6	Grain 2; relict core	53.477	0.075	1.547	0.047	18.959	0.42	25.473	0.49	0.009	0.01	100.507
AL20-26_BSE-image1_px_7	Grain 2; relict core	53.482	0.062	1.413	0.053	18.946	0.434	25.705	0.376	0.004	0.018	100.493
AL20-26_BSE-image1_px_8	Grain 2; relict core	53.44	0.047	1.274	0.016	18.619	0.366	25.477	0.341	0.006	0.013	99.599
AL20-26_BSE-image1_px_9	Grain 3; relict core	53.241	0.036	1.467	0.055	18.97	0.343	24.989	0.707	-0.003	0.012	99.817
AL20-26_BSE-image2_amf_1	Altered opx grain 1	49.814	0.322	9.105	0.089	8.287	0.131	17.17	12.1	0.8	0.038	97.856
AL20-26_BSE-image2_amf_2	Altered opx grain 1	47.461	0.482	11.48	0.157	8.656	0.097	15.907	12.109	1.076	0.051	97.476
AL20-26_BSE-image2_amf_3	Altered opx grain 1	50.072	0.318	8.702	0.054	8.031	0.107	17.303	12.04	0.773	0.033	97.433
AL20-26_BSE-image2_amf_4	Altered cpx grain 1	50.502	0.169	8.428	0.081	8.091	0.106	17.57	12.145	0.691	0.024	97.807
AL20-26_BSE-image2_amf_5	Altered cpx grain 1	49.429	0.226	9.148	0.073	8.405	0.119	17.127	11.754	0.705	0.032	97.018
AL20-26_BSE-image2_amf_6	Altered cpx grain 1	48.017	0.308	10.831	0.064	9.125	0.102	15.813	11.854	0.99	0.043	97.147
AL20-26_BSE-image2_amf_7	Altered opx grain 2 core 2	51.153	0.183	8.151	0.059	7.658	0.091	17.75	12.23	0.662	0.026	97.963
AL20-26_BSE-image2_cpx_1	Grain 1; Relict core	52.856	0.197	2.201	0.039	6.14	0.223	15.453	23.242	0.139	0.012	100.502
AL20-26_BSE-image2_cpx_2	Grain 1; Relict core	52.977	0.173	2.102	0.096	6.226	0.168	15.351	22.954	0.149	0.02	100.216
AL20-26_BSE-image2_cpx_3	Grain 1; Relict core	53.043	0.176	2.028	0.066	6.067	0.188	15.395	23.217	0.161	0.003	100.344
AL20-26_BSE-image2_cpx_4	Grain 1; Relict core	53.223	0.198	1.876	0.093	7.222	0.209	16.544	20.947	0.114	0.011	100.437
AL20-26_BSE-image2_cpx_5	Grain 1; Relict core	53.04	0.189	2.16	0.088	7.268	0.207	16.567	21.149	0.13	0.012	100.81
AL20-26_BSE-image2_cpx_6	Grain 1; Relict core	53.154	0.197	2.236	0.086	5.706	0.16	15.723	23.187	0.138	0.017	100.604
AL20-26_BSE-image2_cpx_7	Grain 2; relict core	53.02	0.187	2.089	0.106	6.326	0.232	16.362	22.179	0.128	0.008	100.637
AL20-26_BSE-image2_cpx_8	Grain 2; relict core	53.141	0.192	2.202	0.097	6.511	0.184	16.161	21.88	0.114	0.015	100.497
AL20-26_BSE-image2_cpx_9	Grain 2; relict core	52.074	0.41	2.661	0.123	7.707	0.21	15.92	21.611	0.121	0.008	100.845
AL20-26_BSE-image2_plg_1	Interstitial	44.772	-0.002	36.325	0	0.057	-0.001	0.003	19.027	0.63	0.018	100.829
AL20-26_BSE-image2_plg_2	Interstitial	45.888	0.009	32.565	-0.01	0.982	0.015	2.602	20.175	0.212	0.013	102.451
AL20-26_BSE-image2_plg_3	Interstitial	44.545	-0.053	36.623	-0.005	0.065	0.014	0.006	19.162	0.514	0.005	100.876
AL20-26_BSE-image2_plg_4	Interstitial	44.716	0.007	36.36	0.018	0.11	-0.004	0.028	19.045	0.562	0.022	100.864
AL20-26_BSE-image2_plg_5	Interstitial	44.965	-0.023	36.509	-0.009	0.102	0.014	-0.002	18.973	0.601	0.018	101.148
AL20-26_BSE-image2_plg_6	Interstitial	46.885	0.005	29.095	-0.028	1.374	0.061	3.882	20.785	0.222	0.002	102.283
AL20-26_BSE-image2_plg_7	Interstitial	45.102	0.009	33.774	-0.037	0.403	0.015	1.276	19.894	0.365	0.003	100.804
AL20-26_BSE-image2_pyroxene_1	Grain 1; Relict core	53.34	0.016	1.679	0.054	18.589	0.397	25.393	0.3	-0.001	0.021	99.788
AL20-26_BSE-image2_pyroxene_10	Grain 2; relict core 2	53.747	0.045	1.501	0.062	17.412	0.42	26.125	0.657	-0.007	0.006	99.968
AL20-26_BSE-image2_pyroxene_11	Grain 2; relict core 2	53.807	0.062	1.424	0.065	18.035	0.365	25.801	0.373	0.005	0.016	99.953
AL20-26_BSE-image2_pyroxene_2	Grain 1; Relict core	53.77	0.02	1.469	0.13	18.443	0.402	25.862	0.291	0.008	0.006	100.401
AL20-26_BSE-image2_pyroxene_3	Grain 1; Relict core	53.798	0.06	1.384	0.107	18.005	0.392	26.093	0.34	0.002	0.017	100.198
AL20-26_BSE-image2_pyroxene_4	Grain 1; Relict core	53.934	0.011	1.393	0.139	17.979	0.385	26.214	0.268	0.002	0.018	100.343
AL20-26_BSE-image2_pyroxene_5	Grain 1; Relict core	53.814	0.073	1.388	0.088	18.438	0.45	25.434	0.608	0	0	100.293
AL20-26_BSE-image2_pyroxene_7	Grain 2; relict core	53.528	0.069	1.504	0.159	18.165	0.447	25.515	0.541	-0.001	0.015	99.942
AL20-26_BSE-image2_pyroxene_8	Grain 2; relict core	53.607	0.089	1.531	0.098	18.288	0.388	25.633	0.432	-0.011	-0.002	100.053
AL20-26_BSE-image2_pyroxene_9	Grain 2; relict core	53.989	0.12	1.407	0.085	18.056	0.447	25.733	0.619	-0.007	0.011	100.46
AL20-26_BSE-image3_amf_1	Alteration of opx/ilmenite	52.121	0.302	5.408	0.174	7.096	0.077	18.981	12.085	0.486	0.045	96.775
AL20-26_BSE-image3_amf_2	Alteration of opx/ilmenite	51.78	0.351	5.891	0.188	6.981	0.073	18.721	12.118	0.568	0.05	96.721
AL20-26_BSE-image3_amf_3	Alteration of opx/ilmenite	50.305	0.535	7.256	0.152	7.636	0.101	17.771	12.155	0.704	0.069	96.684
AL20-26_BSE-image3_amf_4	Alteration of opx/ilmenite	50.226	0.382	7.589	0.173	7.616	0.085	18.231	12.033	0.769	0.039	97.143
AL20-26_BSE-image3_amf_5	alteration of plag/opx	50.512	0.284	8.015	0.057	7.853	0.123	17.555	11.993	0.689	0.037	97.118
AL20-26_BSE-image3_amf_6	alteration of plag/opx	49.66	0.24	7.381	0.124	7.71	0.301	17.29	11.848	0.614	0.064	95.232
AL20-26_BSE-image3_amf_7	Alteration of opx/garnet	52.042	0.232	6.81	0.074	6.879	0.037	18.717	12.22	0.537	0.029	97.577
AL20-26_BSE-image3_amf_8	Alteration of opx/garnet	51.69	0.174	6.822	0.066	6.984	0.091	18.618	12.126	0.546	0.03	97.147
AL20-26_BSE-image3_amf_9	Alteration of opx/garnet	53.512	0.133	4.838	0.017	6.719	0.114	19.592	12.077	0.35	0.025	97.377
AL20-26_BSE-image3_cpx_1	Grain 1	53.053	0.215	1.993	0.067	5.259	0.132	15.847	23.482	0.112	0.008	100.168
AL20-26_BSE-image3_cpx_2	Grain 1	53.259	0.153	1.412	0.091	5.375	0.175	15.921	23.024	0.112	0.015	99.537
AL20-26_BSE-image3_cpx_3	Grain 1	52.621	0.204	2.194	0.074	5.607	0.185	15.715	23.276	0.13	0.006	100.012
AL20-26_BSE-image3_cpx_4	Grain 1	53.227	0.192	1.878	0.075	5.551	0.141	16.224	22.933	0.092	0.011	100.324
AL20-26_BSE-image3_cpx_5	Grain 2	53.25	0.148	1.973	0.079	5.266	0.175	16.005	23.417	0.108	0.005	100.426
AL20-26_BSE-image3_cpx_6	Grain 2	52.912	0.285	2.079	0.1	4.838	0.112	15.793	23.566	0.116	0.014	99.815
AL20-26_BSE-image3_garnet_1	Rim on plag	39.276	0.011	22.874	0.016	21.688	1.447	7.94	7.307	-0.003	0.013	100.569
AL20-26_BSE-image3_garnet_2	Rim on plag	39.241	-0.002	22.637	-0.015	21.016	1.445	7.803	7.836	0.001	0.01	99.972
AL20-26_BSE-image3_garnet_3	Rim on plag	39.215	0.107	22.568	-0.029	20.975	1.292	8.156	7.528	0.003	0.021	99.836
AL20-26_BSE-image3_garnet_4	Rim on plag	39.205	0.027	22.782	0.014	21.337	1.207	8.286	7.212	-0.012	0.019	100.077
AL20-26_BSE-image3_garnet_5	Rim on plag	39.095	0.027	22.488	0.044	21.226	1.44	8.033	7.505	0	0.012	99.87
AL20-26_BSE-image3_garnet_6	Rim on plag	39.165	0.044	22.533	0.038	21.082	1.405	8.117	7.646	-0.003	0.008	100.035
AL20-26_BSE-image3_plg_1	Grain 1	44.422	-0.002	34.935	-0.009	0.187	-0.005	0.43	19.245	0.481	0.004	99.688
AL20-26_BSE-image3_plg_2	Grain 1	43.679	-0.012	36.147	0.024	0.079	-0.049	-0.007	19.465	0.235	0.019	99.58
AL20-26_BSE-image3_plg_3	Grain 1	44.072	-0.012	35.906	0.019	0.054	-0.038	0.002	19.161	0.393	0.014	99.571
AL20-26_BSE-image3_plg_4	Grain 1	44.237	-0.026	35.808	-0.004	0.058	0.023	0.062	19.09	0.459	0.01	99.717
AL20-26_BSE-image3_plg_5	Grain 1	44.51	-0.023	34.67	-0.025	0.238	-0.003	0.823	19.64	0.248	0.006	100.084
AL20-26_BSE-image3_plg_6	Grain 1	44.482	-0.005	35.445	-0.016	0.128	-0.003	0.01	18.763	0.571	0.008	99.383
AL20-26_BSE-image3_plg_7	Grain 1	44.028	0.005	35.414	0.019	0.077	0.004	-0.001	18.849	0.517	0.014	98.926
AL20-26_BSE-image3_plg_8	Grain 1	44.312	0.005	34.645	0.008	0.249	0.01	0.677	19.421	0.34	0.026	99.693
AL20-26_BSE-image3_pyroxene_1	Grain 1	54.288	0.076	1.363	0.052	17.557	0.417	26.176	0.811	0.007	0.021	100.768
AL20-26_BSE-image3_pyroxene_10	Grain 3	53.712	0.114	1.396	0.047	17.339	0.431	26.001	0.853	-0.001	0.024	99.916
AL20-26_BSE-image3_pyroxene_2	Grain 1	54.263	0.083	1.344	0.069	17.079	0.41	26.576	0.604	0.001	0.02	100.449
AL20-26_BSE-image3_pyroxene_3	Grain 1	54.287	0.114	1.258	-0.026	17.412	0.393	26.27	1.092	0.011	0.016	100.827
AL20-26_BSE-image3_pyroxene_4	Grain 1	53.893	0.156	1.494	0.002	18.231	0.38	25.856	0.349	-0.01	0.018	100.369
AL20-26_BSE-image3_pyroxene_5	Grain 1	53.883	0.082	1.554	0.047	17.835	0.417	25.886	0.792	-0.003	0.008	100.501
AL20-26_BSE-image3_pyroxene_6	Grain 2	53.856	0.089	1.328	0.037	17.54	0.37	25.567	1.083	-0.006	0.015	99.879
AL20-26_BSE-image3_pyroxene_7	Grain 2	54.095	0.027	1.416	0.038	18.158	0.349	25.91	0.601	-0.008	0.007	100.593
AL20-26_BSE-image3_pyroxene_8	Grain 2	53.955	0.024	1.372	0.071	18.123	0.348	25.909	0.571	0.001	0.017	100.391
AL20-26_BSE-image3_pyroxene_9	Grain 3	53.755	0.056	1.347	0.041	17.34	0.378	25.988	0.779	0.003	0.018	99.705
AL20-27_BSE-image1_amf_1	Alteration of opx/plag	50.457	0.204	7.238	0.027	8.588	0.104	17.322	11.798	0.593	0.025	96.356
AL20-27_BSE-image1_amf_2	Alteration of opx/plag	51.277	0.16	6.648	0.042	8.445	0.172	17.824	11.823	0.515	0.035	96.941
AL20-27_BSE-image1_amf_3	Alteration of opx/plag	49.222	0.226	8.959	0.002	8.997	0.123	16.4	11.78	0.691	0.05	96.45
AL20-27_BSE-image1_amf_4	Alteration of opx/plag	47.339	0.28	10.873	-0.001	9.744	0.131	15.305	11.894	0.982	0.04	96.587
AL20-27_BSE-image1_amf_5	Alteration of opx/plag	47.774	0.386	10.364	0.031	9.38	0.123	15.44	11.809	0.883	0.034	96.224
AL20-27_BSE-image1_amf_6	Alteration of opx/plag	48.378	0.313	9.612	0.023	9.222	0.123	16.125	11.787	0.819	0.042	96.444
AL20-27_BSE-image1_amf_7	Alteration of opx/plag	51.236	0.174	6.723	0.016	8.383	0.147	17.692	11.92	0.477	0.024	96.792
AL20-27_BSE-image1_amf_8	Alteration of opx/plag/cpx	49.408	0.272	8.701	0.005	9.043	0.17	16.756	11.96	0.696	0.03	97.041
AL20-27_BSE-image1_cpx_1	Grain 1; alteration	52.428	0.176	1.949	-0.01	5.891	0.189	15.332	22.94	0.126	0.009	99.03
AL20-27_BSE-image1_cpx_2	Grain 1; alteration	52.829	0.141	1.793	0.009	5.672	0.201	15.444	23.048	0.121	0.022	99.28
AL20-27_BSE-image1_cpx_3	Grain 1; alteration	52.544	0.137	1.857	0.057	9.724	0.302	17.271	17.545	0.129	0.02	99.586
AL20-27_BSE-image1_cpx_4	Grain 1; alteration	52.551	0.201	2.146	0.006	6	0.218	15.226	23.111	0.154	0.013	99.626
AL20-27_BSE-image1_cpx_5	Grain 1; alteration	52.379	0.17	1.954	0.015	7.66	0.267	15.989	20.447	0.125	0.019	99.025
AL20-27_BSE-image1_cpx_6	Grain 1; alteration	52.595	0.199	1.911	-0.03	5.995	0.241	15.283	22.866	0.148	0.02	99.228
AL20-27_BSE-image1_cpx_7	Grain 1; alteration	52.704	0.118	1.907	0.006	5.913	0.192	15.401	22.907	0.152	0.02	99.32
AL20-27_BSE-image1_plg_1	Interstitial	44.096	0.002	35.351	0.005	0.273	0.014	0.444	19.013	0.414	0.021	99.633
AL20-27_BSE-image1_plg_10	Grain 3	44.478	-0.028	35.698	0.014	0.116	-0.004	0.014	18.576	0.618	0.021	99.503
AL20-27_BSE-image1_plg_2	Interstitial	44.66	-0.021	35.919	0	0.138	-0.008	0.006	18.479	0.686	0.015	99.874
AL20-27_BSE-image1_plg_3	Grain 1	44.475	0	35.291	0.011	0.328	0.029	0.399	18.843	0.503	0.014	99.893
AL20-27_BSE-image1_plg_4	Grain 1	44.683	0	35.855	-0.003	0.091	0.015	0.006	18.569	0.664	0.02	99.9
AL20-27_BSE-image1_plg_5	Grain 1	44.086	-0.03	36.122	-0.011	0.134	0.011	0.017	18.993	0.466	0.027	99.815
AL20-27_BSE-image1_plg_6	Grain 1	44.452	-0.009	36.035	0	0.138	0.002	-0.003	18.896	0.549	0.013	100.073
AL20-27_BSE-image1_plg_7	Grain 2	44.379	-0.023	35.558	-0.004	0.106	-0.018	0.001	18.65	0.636	0.025	99.31
AL20-27_BSE-image1_plg_8	Grain 2	44.141	-0.002	36.013	-0.02	0.096	0.014	-0.011	18.954	0.496	0.011	99.692
AL20-27_BSE-image1_plg_9	Grain 3	44.535	0.028	35.877	-0.001	0.098	-0.004	0.001	18.557	0.641	0.025	99.757
AL20-27_BSE-image1_pyroxene_1	Grain 1; relict core 1	52.772	0.044	1.583	0.019	20.173	0.527	23.75	0.58	-0.004	0.022	99.466
AL20-27_BSE-image1_pyroxene_2	Grain 1; relict core 1	52.627	0.08	1.334	0.015	19.783	0.527	23.843	0.634	-0.003	0.013	98.853
AL20-27_BSE-image1_pyroxene_3	Grain 1; relict core 1	53.254	0.062	1.374	0.009	19.772	0.517	24.224	0.727	0.008	0.012	99.959
AL20-27_BSE-image1_pyroxene_4	Grain 1; relict core 1	52.826	0.062	1.398	-0.018	19.96	0.564	23.946	0.314	0.014	0.011	99.077
AL20-27_BSE-image1_pyroxene_5	Grain 1; relict core 2	52.929	0.075	1.497	0.015	19.945	0.552	23.721	0.445	-0.007	0.015	99.187
AL20-27_BSE-image1_pyroxene_6	Grain 1; relict core 2	53.08	0.084	1.322	0.011	19.311	0.543	24.027	0.75	-0.013	0.007	99.122
AL20-27_BSE-image1_pyroxene_7	Grain 1; relict core 2	52.947	0.053	1.34	0.043	19.852	0.592	24.038	0.334	0.004	0.007	99.21
AL20-27_BSE-image1_pyroxene_8	Grain 1; relict core 2	52.849	0.097	1.423	0.026	19.85	0.579	23.916	0.526	0.001	0.014	99.281
AL20-27_BSE-image2_amf_1	Alteration of plag/opx/cpx	49.973	0.176	8.045	0.011	8.974	0.14	16.599	11.947	0.621	0.026	96.512
AL20-27_BSE-image2_amf_10	Alteration of plag/opx	50.356	0.128	7.252	0.05	9.554	0.178	16.502	11.752	0.567	0.034	96.373
AL20-27_BSE-image2_amf_2	Alteration of plag/opx/cpx	49.857	0.21	7.986	0.006	8.984	0.133	16.73	11.901	0.599	0.03	96.436
AL20-27_BSE-image2_amf_3	Alteration of plag/opx/cpx	49.36	0.215	8.447	0.025	9.161	0.13	16.38	11.818	0.692	0.035	96.263
AL20-27_BSE-image2_amf_4	Alteration of plag/opx/cpx	50.229	0.176	7.817	0.012	8.92	0.165	16.533	11.798	0.576	0.021	96.247
AL20-27_BSE-image2_amf_5	Alteration of plag/opx	50.524	0.18	7.346	0.023	10.036	0.197	16.401	11.394	0.503	0.023	96.627
AL20-27_BSE-image2_amf_6	Alteration of plag/opx	51.153	0.121	6.835	0.004	9.185	0.169	16.906	11.834	0.471	0.022	96.7
AL20-27_BSE-image2_amf_7	Alteration of plag/opx	50.659	0.171	7.102	-0.026	9.382	0.184	16.728	11.763	0.554	0.025	96.542
AL20-27_BSE-image2_amf_8	Alteration of plag/opx	49.407	0.155	7.799	0.016	10.201	0.174	15.922	11.679	0.63	0.041	96.024
AL20-27_BSE-image2_amf_9	Alteration of plag/opx	49.415	0.089	7.912	0.005	9.823	0.191	16.052	11.634	0.679	0.028	95.828
AL20-27_BSE-image2_cpx_1	Grain 1	52.597	0.185	2.276	0.035	7.136	0.246	15.5	21.633	0.124	0.023	99.755
AL20-27_BSE-image2_cpx_10	Grain 2	52.387	0.157	1.998	-0.004	6.068	0.275	15.088	22.761	0.156	0.022	98.908
AL20-27_BSE-image2_cpx_2	Grain 1	52.463	0.16	2.233	0.01	6.893	0.283	15.435	21.753	0.134	0.022	99.386
AL20-27_BSE-image2_cpx_3	Grain 1	53.035	0.221	1.762	0.019	8.195	0.288	16.235	20.237	0.113	0.006	100.111
AL20-27_BSE-image2_cpx_4	Grain 1	52.968	0.104	1.457	0.004	6.152	0.231	15.388	22.92	0.16	0.024	99.408
AL20-27_BSE-image2_cpx_5	Grain 1	51.422	0.332	2.287	0.009	7.952	0.24	15.054	21.839	0.14	0.017	99.292
AL20-27_BSE-image2_cpx_6	Grain 2	52.426	0.176	2.253	0.064	6.47	0.253	14.92	22.739	0.177	0.009	99.487
AL20-27_BSE-image2_cpx_7	Grain 2	52.84	0.118	1.744	0.022	6.305	0.236	15.243	23.173	0.153	0.018	99.852
AL20-27_BSE-image2_cpx_8	Grain 2	52.859	0.183	1.92	0.009	6.399	0.236	15.165	22.807	0.166	0.008	99.752
AL20-27_BSE-image2_cpx_9	Grain 2	52.719	0.16	2.121	-0.016	6.315	0.225	15.038	23.065	0.136	0.021	99.784
AL20-27_BSE-image2_plg_1	Grain 1	44.324	0.005	35.79	0.009	0.109	0.021	-0.005	18.685	0.578	0.022	99.538
AL20-27_BSE-image2_plg_10	Grain 2	44.495	0.009	35.708	0.009	0.097	-0.015	-0.004	18.837	0.658	0.015	99.809
AL20-27_BSE-image2_plg_2	Grain 1	44.445	-0.016	35.537	-0.014	0.096	-0.002	0.003	18.577	0.701	0.02	99.347
AL20-27_BSE-image2_plg_3	Grain 1	44.306	0.023	35.795	-0.001	0.09	-0.009	-0.006	18.911	0.563	0.015	99.687
AL20-27_BSE-image2_plg_4	Grain 1	44.676	0.016	35.677	0.009	0.1	-0.004	-0.004	18.692	0.621	0.02	99.803
AL20-27_BSE-image2_plg_5	Grain 2	43.987	-0.021	35.809	0.023	0.114	-0.012	0.028	18.912	0.475	0.011	99.326
AL20-27_BSE-image2_plg_6	Grain 2	44.177	0.03	35.761	-0.016	0.079	-0.011	-0.007	18.821	0.503	0.021	99.358
AL20-27_BSE-image2_plg_7	Grain 2	44.592	0.014	35.514	-0.026	0.09	0.029	0.002	18.741	0.614	0.01	99.58
AL20-27_BSE-image2_plg_8	Grain 2	44.269	0.005	36.054	-0.024	0.092	0.003	-0.002	18.911	0.523	0.024	99.855
AL20-27_BSE-image2_plg_9	Grain 2	44.541	0.005	35.818	0.013	0.092	-0.009	-0.01	18.77	0.551	0.021	99.792
AL20-27_BSE-image2_pyroxene_1	Grain 1; relict core 1	52.476	0.015	1.51	0.007	20.997	0.645	23.097	0.367	0	0.005	99.119
AL20-27_BSE-image2_pyroxene_10	Grain 2; ghost core	54.744	0.031	1.566	0.005	16.711	0.469	21.419	0.778	0.087	0.001	95.811
AL20-27_BSE-image2_pyroxene_11	Grain 3; ghost core	54.034	0.044	1.195	0.014	19.195	0.553	19.036	1.718	0.081	0.021	95.891
AL20-27_BSE-image2_pyroxene_2	Grain 1; relict core 1	52.54	-0.011	1.647	0.014	20.742	0.589	23.168	0.301	0.006	0.012	99.008
AL20-27_BSE-image2_pyroxene_3	Grain 1; relict core 1	52.41	0	1.683	0.021	20.851	0.635	23.428	0.312	0.015	0.019	99.374
AL20-27_BSE-image2_pyroxene_4	Grain 1; relict core 1	52.349	0.044	1.463	-0.009	20.535	0.625	22.992	0.28	0.002	0.016	98.297
AL20-27_BSE-image2_pyroxene_5	Grain 1; relict core 1	52.447	0.029	1.502	0.019	20.519	0.58	23.125	0.309	0.023	0.036	98.589
AL20-27_BSE-image2_pyroxene_6	Grain 1; relict core 2	52.507	0.031	1.404	-0.018	20.592	0.608	22.912	0.749	-0.005	0.017	98.797
AL20-27_BSE-image2_pyroxene_7	Grain 1; relict core 2	52.541	0.049	1.375	0.001	20.643	0.63	23.225	0.384	0.005	0.012	98.865
AL20-27_BSE-image2_pyroxene_8	Grain 1; relict core 2	52.208	0.038	1.482	-0.025	20.594	0.606	23.159	0.633	0.001	0.015	98.711
AL20-27_BSE-image2_pyroxene_9	Grain 1; relict core 2	52.381	0.02	1.516	0.016	20.859	0.627	22.957	0.348	0.002	0.019	98.745
AL20-27_BSE-image3_amf_1	Grain 1	51.984	0.125	5.727	-0.024	8.524	0.095	17.76	12.028	0.405	0.03	96.654
AL20-27_BSE-image3_amf_2	Grain 1	51.822	0.071	5.75	-0.022	8.231	0.088	17.824	12.029	0.408	0.044	96.245
AL20-27_BSE-image3_amf_3	Grain 1	51.977	0.118	6.145	0.004	8.344	0.046	17.879	12.042	0.45	0.046	97.051
AL20-27_BSE-image3_amf_4	Grain 1	50.78	0.113	5.695	0.043	10.646	0.099	17.558	11.619	0.396	0.039	96.988
AL20-27_BSE-image3_amf_5	Grain 1	51.581	0.121	5.841	-0.007	8.311	0.11	17.562	12.009	0.437	0.048	96.013
AL20-27_BSE-image3_cpx_1	Grain 1; relict core	52.471	0.149	2.342	-0.015	7.549	0.238	15.488	20.345	0.203	0.025	98.795
AL20-27_BSE-image3_cpx_2	Grain 1; relict core	52.283	0.172	2.141	0.092	7.459	0.236	15.294	21.007	0.157	0.019	98.86
AL20-27_BSE-image3_cpx_3	Grain 1; relict core	52.834	0.136	2.071	0.045	6.873	0.215	14.758	22.715	0.217	0.016	99.88
AL20-27_BSE-image3_cpx_4	Grain 1; relict core	52.264	0.184	1.942	0.042	8.088	0.255	15.552	20.562	0.154	0.001	99.044
AL20-27_BSE-image3_cpx_5	Grain 2; within amph	53.751	0.03	0.851	0.024	5.71	0.122	15.814	23.224	0.11	0.009	99.645
AL20-27_BSE-image3_cpx_6	Grain 3; within amph	54.072	0.171	3.442	-0.005	8.091	0.108	18.964	11.876	0.218	0.034	96.971
AL20-27_BSE-image3_garnet_1	Grain 1; alteration of amph/plag	38.692	-0.004	22.213	0.014	23.142	1.631	6.463	7.275	-0.014	0.01	99.422
AL20-27_BSE-image3_garnet_10	Grain 4; alteration of amph/plag	38.674	0.013	22.122	-0.004	21.773	1.481	6.246	8.783	-0.006	0.013	99.095
AL20-27_BSE-image3_garnet_11	Grain 5; alteration of amph/plag	38.784	-0.033	22.3	0.024	23.108	1.48	6.607	7.56	-0.004	0.031	99.857
AL20-27_BSE-image3_garnet_12	Grain 6; alteration of amph/plag	38.636	0.055	22.213	0.035	22.689	1.524	6.566	7.871	-0.001	0.014	99.602
AL20-27_BSE-image3_garnet_13	Grain 6; alteration of amph/plag	38.676	-0.011	22.121	-0.02	23.121	1.534	6.601	7.332	0.002	0.014	99.37
AL20-27_BSE-image3_garnet_2	Grain 1; alteration of amph/plag	38.689	0	22.219	-0.004	22.739	1.521	6.677	7.391	0.002	0.022	99.256
AL20-27_BSE-image3_garnet_3	Grain 1; alteration of amph/plag	38.663	0.051	22.079	0.032	22.995	1.515	6.417	7.823	0	0.016	99.591
AL20-27_BSE-image3_garnet_4	Grain 2; alteration of amph/plag	38.651	0.004	22.248	-0.02	23.055	1.612	6.409	7.717	-0.007	0.021	99.69
AL20-27_BSE-image3_garnet_5	Grain 2; alteration of amph/plag	38.65	0.038	22.048	0.02	22.429	1.512	6.267	8.335	0.005	0.011	99.315
AL20-27_BSE-image3_garnet_6	Grain 3; alteration of amph/plag	38.782	0.015	22.296	-0.014	22.278	1.433	6.51	8.272	0.001	0.012	99.585
AL20-27_BSE-image3_garnet_7	Grain 3; alteration of amph/plag	38.573	0.026	22.075	0.014	23.137	1.486	6.055	8.316	0.005	0.018	99.705
AL20-27_BSE-image3_garnet_8	Grain 3; alteration of amph/plag	38.763	-0.024	22.23	0.007	22.75	1.518	6.557	7.5	0.016	0.023	99.34
AL20-27_BSE-image3_garnet_9	Grain 3; alteration of amph/plag	38.711	0.055	21.999	0.011	22.981	1.612	6.029	8.48	0.022	0.018	99.918
AL20-27_BSE-image3_plg_1	Grain 1	44.51	-0.016	35.466	-0.011	0.089	0.013	0.005	18.688	0.633	0.023	99.4
AL20-27_BSE-image3_plg_2	Grain 1	45.213	0.009	34.911	-0.003	0.081	-0.015	-0.005	18.44	0.492	0.009	99.132
AL20-27_BSE-image3_plg_3	Grain 1	44.584	0.009	35.188	-0.024	0.113	-0.01	0.006	18.626	0.672	0.017	99.181
AL20-27_BSE-image3_plg_4	Grain 1	44.504	0.005	35.485	0.034	0.077	0.017	-0.001	18.778	0.599	0.007	99.505
AL20-27_BSE-image3_plg_5	Grain 1	44.117	-0.002	35.875	-0.02	0.051	0.026	0.026	19.063	0.456	0.024	99.616
AL20-29_BSE-image1_amf_1	Alteration of opx grain	47.117	0.516	9.497	0.123	11.381	0.098	14.206	11.572	1.086	0.192	95.788
AL20-29_BSE-image1_amf_10	Alteration of opx/cpx	46.354	0.241	10.888	0.018	12.147	0.163	13.576	11.573	1.063	0.186	96.209
AL20-29_BSE-image1_amf_2	Alteration of opx grain	47.492	0.48	8.978	0.207	11.288	0.145	14.445	11.636	1.002	0.176	95.849
AL20-29_BSE-image1_amf_3	Alteration of opx grain	50.731	0.322	5.683	0.099	10.294	0.107	16.698	11.566	0.562	0.097	96.159
AL20-29_BSE-image1_amf_4	Alteration of opx grain	51.116	0.278	5.345	0.38	10.32	0.085	16.609	11.524	0.576	0.084	96.317
AL20-29_BSE-image1_amf_5	Alteration of opx/cpx	53.741	0.085	3.246	0.033	9.852	0.078	17.912	11.614	0.275	0.046	96.882
AL20-29_BSE-image1_amf_6	Alteration of opx/cpx	48.808	0.258	8.028	0.011	11.428	0.109	15.109	11.546	0.818	0.141	96.256
AL20-29_BSE-image1_amf_7	Alteration of opx/cpx	47.658	0.191	9.411	0.013	11.748	0.13	14.408	11.463	0.956	0.18	96.158
AL20-29_BSE-image1_amf_8	Alteration of opx/cpx	51.785	0.087	5.45	-0.009	10.151	0.15	17.022	11.467	0.484	0.07	96.657
AL20-29_BSE-image1_amf_9	Alteration of opx/cpx	52.609	0.135	4.568	-0.004	9.824	0.096	17.225	11.775	0.389	0.039	96.656
AL20-29_BSE-image1_cpx_1	Grain 1; alteration	52.789	0.139	1.596	0.02	6.943	0.173	14.637	22.809	0.204	0.014	99.324
AL20-29_BSE-image1_cpx_2	Grain 1; alteration	52.764	0.12	1.632	0.02	7.102	0.218	14.617	22.625	0.245	0.014	99.357
AL20-29_BSE-image1_cpx_3	Grain 1; alteration	53.061	0.148	1.624	0.022	7.004	0.217	14.714	22.47	0.263	0.019	99.542
AL20-29_BSE-image1_cpx_4	Grain 1; alteration	53.038	0.101	1.36	0.037	9.452	0.219	15.607	19.865	0.174	0.015	99.868
AL20-29_BSE-image1_cpx_5	Grain 1; alteration	53.042	0.153	1.609	0.026	7.052	0.206	14.793	22.719	0.237	0.012	99.849
AL20-29_BSE-image1_cpx_6	Grain 2; alteration	52.81	0.113	1.514	0.036	7.118	0.208	14.6	22.662	0.253	0.026	99.34
AL20-29_BSE-image1_cpx_7	Grain 2; alteration	52.864	0.081	1.54	0.017	7.964	0.224	14.946	21.562	0.213	0.012	99.423
AL20-29_BSE-image1_cpx_8	Grain 2; alteration	52.555	0.326	1.538	0.03	7.87	0.195	14.653	22.43	0.228	0.011	99.836
AL20-29_BSE-image1_garnet_1	Rim of amph and cpx	38.573	0.042	21.89	0.012	23.585	1.422	5.593	8.292	0.008	0.023	99.44
AL20-29_BSE-image1_garnet_2	Rim of amph and cpx	38.275	0.02	22.05	0	23.256	1.338	5.027	9.491	0.001	0.016	99.474
AL20-29_BSE-image1_garnet_3	Rim of amph and cpx	38.428	0.007	22.064	0.005	24.234	1.436	5.827	7.68	-0.011	0.025	99.695
AL20-29_BSE-image1_garnet_4	Rim of amph and cpx	38.614	0.002	22.182	0.016	24.337	1.355	6.061	7.225	0	0.014	99.806
AL20-29_BSE-image1_garnet_5	Rim of amph and cpx	38.541	-0.007	22.321	-0.007	24.678	1.418	5.638	7.435	0	0.011	100.028
AL20-29_BSE-image1_garnet_6	Rim of amph and cpx	38.631	-0.002	22.285	-0.001	24.294	1.405	5.955	7.443	-0.006	0.014	100.018
AL20-29_BSE-image1_plg_1	Grain 1	44.484	0.007	35.597	0	0.184	0.004	-0.008	18.747	0.65	0.009	99.674
AL20-29_BSE-image1_plg_10	Grain 3	45.845	0.021	34.694	0.026	0.086	-0.017	0.014	17.658	1.267	0.026	99.62
AL20-29_BSE-image1_plg_2	Grain 1	45.669	-0.047	34.964	-0.003	0.085	-0.032	-0.01	17.685	1.148	0.019	99.478
AL20-29_BSE-image1_plg_3	Grain 1	45.655	-0.002	34.849	0.001	0.086	0.013	-0.005	17.909	1.142	0.029	99.677
AL20-29_BSE-image1_plg_4	Grain 2	45.669	-0.026	34.767	0	0.142	-0.009	0.003	17.657	1.177	0.024	99.404
AL20-29_BSE-image1_plg_5	Grain 2	45.982	0.033	34.473	-0.028	0.341	-0.02	0.282	17.689	1.188	0.028	99.968
AL20-29_BSE-image1_plg_6	Grain 2	45.753	0.039	34.822	-0.001	0.12	0.02	0.011	17.816	1.201	0.016	99.797
AL20-29_BSE-image1_plg_7	Grain 3	46.057	-0.028	34.865	-0.004	0.133	0.008	0.008	17.553	1.28	0.031	99.903
AL20-29_BSE-image1_plg_8	Grain 3	46.017	0.019	34.37	0.004	0.335	0.011	0.272	17.629	1.187	0.027	99.871
AL20-29_BSE-image1_plg_9	Grain 3	45.699	-0.033	34.94	0.013	0.074	-0.017	-0.002	17.88	1.115	0.018	99.687
AL20-29_BSE-image1_pyroxene_1	Grain 1; Relict core	51.865	0.06	1.462	0.168	22.202	0.478	22.139	0.336	0.002	0.022	98.734
AL20-29_BSE-image1_pyroxene_2	Grain 1; Relict core	52.208	0.038	1.441	0.187	21.098	0.434	22.688	0.335	0.006	0.028	98.463
AL20-29_BSE-image1_pyroxene_3	Grain 1; Relict core	52.513	-0.013	1.205	0.168	21.56	0.434	22.817	0.403	0.001	0.026	99.114
AL20-29_BSE-image1_pyroxene_4	Grain 1; Relict core	52.274	0.051	0.987	0.103	21.863	0.45	22.517	0.321	0.006	0.019	98.591
AL20-29_BSE-image1_pyroxene_5	Grain 1; Relict core	52.376	0.055	1.003	0.03	22.767	0.468	21.488	0.566	-0.004	0.008	98.757
AL20-29_BSE-image1_pyroxene_6	Grain 1; Relict core	52.194	0.015	1.293	0.106	22.378	0.471	21.198	1.16	0.011	0.007	98.833
AL20-29_BSE-image1_pyroxene_7	Grain 1; Relict core	52.038	0.024	1.422	0.21	22.208	0.473	21.547	0.875	0.006	0.01	98.813
AL20-29_BSE-image1_pyroxene_8	Grain 1; Relict core	52.168	0.029	1.301	0.161	22.352	0.446	21.608	0.372	0.01	0.021	98.468
AL20-29_BSE-image1_pyroxene_9	Grain 1; Relict core	52.211	0.06	1.048	0.008	22.812	0.507	21.825	0.331	0	0.011	98.813
AL20-29_BSE-image2_amf_1	Alteration of opx/plag	43.06	0.567	13.58	0.168	13.808	0.055	11.48	11.549	1.393	0.348	96.008
AL20-29_BSE-image2_amf_2	Alteration of opx/plag	45.855	0.598	10.381	0.132	12.4	0.128	13.478	11.388	1.112	0.272	95.744
AL20-29_BSE-image2_amf_3	Alteration of opx/plag; darker zone	52.714	0.176	4.196	0.075	10.088	0.123	17.399	11.775	0.33	0.067	96.943
AL20-29_BSE-image2_amf_4	Alteration of opx/plag; darker zone	52.865	0.164	3.918	0.021	9.954	0.14	17.508	11.707	0.346	0.062	96.685
AL20-29_BSE-image2_amf_5	Alteration of opx/plag	44.86	0.385	12.404	0.055	12.581	0.132	12.262	11.095	1.067	0.253	95.094
AL20-29_BSE-image2_cpx_1	Grain 1; alteration	53.045	0.079	1.54	0.026	7.174	0.228	14.915	22.631	0.253	0.016	99.907
AL20-29_BSE-image2_cpx_2	Grain 1; alteration	51.939	0.167	2.061	0.148	7.139	0.169	14.27	22.006	0.305	0.024	98.228
AL20-29_BSE-image2_cpx_3	Grain 1; alteration	52.763	0.139	1.543	0.131	7.011	0.18	14.639	22.72	0.233	0.01	99.369
AL20-29_BSE-image2_cpx_4	Grain 2; alteration	52.633	0.137	1.784	0.067	7.557	0.174	14.362	22.744	0.254	0.019	99.731
AL20-29_BSE-image2_cpx_5	Grain 2; alteration	52.73	0.132	1.573	0.073	7.388	0.164	14.432	22.647	0.244	0.019	99.402
AL20-29_BSE-image2_cpx_6	Grain 2; alteration	52.683	0.141	1.632	-0.007	7.42	0.121	14.376	22.409	0.272	-0.005	99.042
AL20-29_BSE-image2_cpx_7	Grain 2; alteration	53.047	0.044	1.114	-0.026	7.276	0.173	14.65	22.819	0.215	0.015	99.327
AL20-29_BSE-image2_cpx_8	Grain 2; alteration	53.001	0.062	1.48	0.005	7.19	0.15	14.621	22.71	0.277	0.009	99.505
AL20-29_BSE-image2_plg_1	Grain 1	45.989	0.014	34.927	-0.02	0.132	0.006	0.006	17.814	1.259	0.017	100.144
AL20-29_BSE-image2_plg_2	Grain 2	46.28	-0.007	34.733	-0.016	0.084	0.005	0.008	17.689	1.132	0.021	99.929
AL20-29_BSE-image2_plg_3	Grain 2	46.157	-0.037	34.83	-0.001	0.088	0.008	0.005	17.655	1.328	0.021	100.054
AL20-29_BSE-image2_plg_4	Grain 2	46.755	0.039	34.269	-0.037	0.071	-0.032	0.004	17.109	1.618	0.033	99.829
AL20-29_BSE-image2_plg_5	Grain 3	46.132	-0.021	34.609	-0.018	0.07	0.001	0.006	17.628	1.378	0.016	99.801
AL20-29_BSE-image2_plg_6	Grain 3	46.3	0.002	34.525	-0.004	0.077	0.042	-0.006	17.463	1.358	0.029	99.786
AL20-29_BSE-image2_plg_7	Grain 3	46.315	0.03	34.85	0.003	0.054	-0.012	0	17.659	1.342	0.017	100.258
AL20-29_BSE-image2_pyroxene_1	Grain 1; relict core 1	52.18	0.018	1.015	0.006	23.479	0.435	21.308	0.375	0.002	0.023	98.841
AL20-29_BSE-image2_pyroxene_2	Grain 1; relict core 1	52.441	0.046	0.742	0.052	23.623	0.466	21.181	0.352	0.009	0.007	98.919
AL20-29_BSE-image2_pyroxene_3	Grain 1; relict core 1	51.058	1.423	0.897	0.002	24.374	0.439	20.688	1.021	0.005	0.006	99.913
AL20-29_BSE-image2_pyroxene_4	Grain 1; relict core 1	52.031	0.053	1.022	0.069	24.07	0.407	20.646	0.837	0.017	0.023	99.175
AL20-29_BSE-image2_pyroxene_5	Grain 1; relict core 2	51.957	0.075	0.891	0.005	23.978	0.415	21.07	0.51	-0.003	0.008	98.906
AL20-29_BSE-image2_pyroxene_6	Grain 1; relict core 2	52.192	0.055	0.94	0.016	22.88	0.408	21.27	0.807	-0.001	0.01	98.577
AL20-29_BSE-image2_pyroxene_7	Grain 1; relict core 2	52.172	0.095	0.887	-0.024	23.59	0.397	20.834	1.038	0.014	0.021	99.024
AL20-29_BSE-image2_pyroxene_8	Grain 1; relict core 2	52.084	0.004	0.789	0.005	23.99	0.436	20.482	1.125	0	0.011	98.926
AL20-30_BSE-image1_amf_1	Alteration of cpx/opx	54.138	0.16	3.75	0.114	6.776	0.088	19.474	12	0.335	0.043	96.878
AL20-30_BSE-image1_amf_2	Alteration of cpx/opx	52.79	0.155	5.161	0.106	7.049	0.098	19.003	11.874	0.476	0.083	96.795
AL20-30_BSE-image1_amf_3	Alteration of cpx/opx	53.81	0.155	4.085	0.114	7.32	0.093	19.142	11.756	0.36	0.058	96.893
AL20-30_BSE-image1_amf_4	Alteration of cpx/opx	52.85	0.168	5.119	0.056	7.355	0.103	18.549	11.923	0.46	0.07	96.653
AL20-30_BSE-image1_amf_5	Alteration of cpx/opx	51.954	0.239	5.955	0.118	7.712	0.113	18.277	11.783	0.603	0.092	96.846
AL20-30_BSE-image1_cpx_1	Grain 1; relict core	53.291	0.101	1.408	0.073	5.575	0.141	15.544	23.003	0.187	0.008	99.331
AL20-30_BSE-image1_cpx_2	Grain 1; relict core	52.955	0.214	2.032	0.179	5.782	0.168	15.195	22.917	0.212	0.014	99.668
AL20-30_BSE-image1_cpx_3	Grain 1; relict core	53.331	0.191	1.517	0.121	5.56	0.155	15.374	23.161	0.179	0.016	99.605
AL20-30_BSE-image1_cpx_4	Grain 1; relict core	53.442	0.101	1.344	0.101	5.617	0.126	15.508	23.028	0.172	0.013	99.452
AL20-30_BSE-image1_cpx_5	Grain 1; relict core	52.689	0.159	1.829	0.154	6.018	0.123	15.033	22.56	0.213	0.015	98.793
AL20-30_BSE-image1_garnet_1	Alteration rim of amph/plag	38.753	0.108	22.279	0.032	21.669	1.404	7.157	7.601	-0.005	0.001	98.999
AL20-30_BSE-image1_garnet_2	Alteration rim of amph/plag	38.637	0.077	22.118	0.04	22.164	1.412	7.099	7.699	0.006	0.016	99.268
AL20-30_BSE-image1_garnet_3	Alteration rim of amph/plag	38.879	0.026	22.765	-0.003	22.321	1.404	7.337	7.226	0.004	0.01	99.969
AL20-30_BSE-image1_garnet_4	Alteration rim of amph/plag	38.875	0.031	22.358	0.059	22.447	1.42	7.374	6.966	-0.009	0.009	99.53
AL20-30_BSE-image1_garnet_5	Alteration rim of amph/plag	38.758	0.018	22.379	0.007	22.904	1.463	6.937	6.791	0.001	0.01	99.268
AL20-30_BSE-image1_garnet_6	Alteration rim of amph/plag	38.992	0.013	22.66	-0.016	21.794	1.29	7.282	7.834	-0.005	0.017	99.861
AL20-30_BSE-image1_garnet_7	Alteration rim of amph/plag	38.908	0.108	22.223	0.041	21.903	1.392	6.784	8.052	0.014	0.019	99.444
AL20-30_BSE-image1_garnet_8	Alteration rim of amph/plag	38.949	0.053	22.443	0.005	22.439	1.331	6.92	8.075	0.001	0.012	100.228
AL20-30_BSE-image1_garnet_9	Alteration rim of amph/plag	39.095	-0.02	22.601	0.007	22.071	1.149	7.332	7.556	0.024	0.018	99.833
AL20-30_BSE-image1_pyroxene_1	Grain 1; relict core	53.311	0.015	1.182	0.035	19.474	0.436	24.41	0.297	0.008	0.016	99.184
AL20-30_BSE-image1_pyroxene_2	Grain 1; relict core	53.272	0.053	1.257	0.036	19.273	0.393	24.42	0.29	-0.005	0.019	99.008
AL20-30_BSE-image1_pyroxene_3	Grain 1; relict core	53.217	0.062	1.372	0.032	19.503	0.419	24.364	0.302	0.005	0.01	99.286
AL20-30_BSE-image1_pyroxene_4	Grain 1; relict core	53.418	0.077	1.139	0.014	19.431	0.451	24.423	0.27	0.001	0.012	99.236
AL20-30_BSE-image1_pyroxene_5	Grain 1; relict core	53.104	0.024	1.365	0.018	19.689	0.398	24.292	0.332	-0.001	0.013	99.234
AL20-30_BSE-image2_amf_1	OPX	53.143	0.018	1.119	0.06	18.684	0.404	24.853	0.275	-0.004	0.021	98.573
AL20-30_BSE-image2_amf_10	Alteration of opx/cpx	50.606	0.206	7.814	0.074	8.102	0.132	17.452	11.71	0.742	0.147	96.985
AL20-30_BSE-image2_amf_2	OPX	53.373	0.013	1.373	0.139	18.265	0.404	24.775	0.292	0.022	0.02	98.676
AL20-30_BSE-image2_amf_3	OPX	53.569	0.004	1.339	0.16	18.675	0.41	24.605	0.279	0.006	0.001	99.048
AL20-30_BSE-image2_amf_4	OPX	53.47	0.022	1.122	0.08	18.99	0.399	24.53	0.342	0.004	0.013	98.972
AL20-30_BSE-image2_amf_5	OPX	53.728	0.029	1.118	0.093	19.188	0.442	24.664	0.306	-0.004	0.008	99.572
AL20-30_BSE-image2_amf_6	Alteration of opx/cpx	49.976	0.199	7.995	0.096	8.333	0.134	16.914	11.465	0.775	0.151	96.038
AL20-30_BSE-image2_amf_7	Alteration of opx/cpx	50.774	0.231	7.114	0.091	7.841	0.156	17.352	11.756	0.641	0.139	96.095
AL20-30_BSE-image2_amf_8	Alteration of opx/cpx	50.335	0.251	7.955	0.15	8.01	0.116	17.167	11.819	0.755	0.151	96.709
AL20-30_BSE-image2_amf_9	Alteration of opx/cpx	49.994	0.131	8.349	0.05	8.136	0.102	16.834	11.68	0.782	0.151	96.209
AL20-30_BSE-image2_cpx_1	Grain 1; Relict core	52.504	0.099	2.815	0.141	6.165	0.15	15.254	21.061	0.278	0.035	98.502
AL20-30_BSE-image2_cpx_2	Grain 1; Relict core	52.996	0.172	1.902	0.109	6.019	0.172	14.969	22.642	0.232	0.005	99.218
AL20-30_BSE-image2_cpx_3	Grain 1; Relict core	53.088	0.145	1.899	0.031	6.242	0.173	15.255	22.07	0.217	0.012	99.132
AL20-30_BSE-image2_cpx_4	Grain 1; Relict core	52.975	0.183	1.79	0.112	6.045	0.17	15.134	22.302	0.189	0.015	98.915
AL20-30_BSE-image2_cpx_5	Grain 1; Relict core	53.005	0.156	1.952	0.119	5.714	0.174	15.212	22.915	0.217	0.024	99.488
AL20-30_BSE-image2_cpx_6	Grain 1; Relict core	52.917	0.229	1.837	0.117	5.992	0.186	15.182	22.902	0.23	0.003	99.595
AL20-30_BSE-image2_plg_1	Grain 1	44.877	0.016	34.207	-0.025	0.499	-0.032	0.868	18.407	0.565	0.024	99.406
AL20-30_BSE-image2_plg_2	Grain 1	44.734	0.025	35.36	-0.014	0.049	0.004	-0.003	18.585	0.735	0.015	99.49
AL20-30_BSE-image2_plg_3	Grain 1	44.86	-0.025	35.336	-0.004	0.023	-0.019	0.004	18.375	0.814	0.017	99.381
AL20-30_BSE-image2_plg_4	Grain 1	44.763	-0.018	35.291	-0.001	0.041	-0.003	0.01	18.405	0.79	0	99.278
AL20-30_BSE-image2_pyroxene_1	Grain 1; Relict core	52.916	0.048	1.194	0.123	20.294	0.476	23.573	0.366	0.012	0.023	99.025
AL20-30_BSE-image2_pyroxene_2	Grain 1; Relict core	52.983	0.02	1.119	0.048	20.566	0.542	23.273	0.335	0.01	0.015	98.911
AL20-30_BSE-image2_pyroxene_3	Grain 1; Relict core	52.711	0.053	1.294	0.043	20.084	0.496	23.431	0.348	-0.002	0.008	98.466
AL20-30_BSE-image2_pyroxene_4	Grain 1; Relict core	52.972	0.004	1.389	0.061	20.247	0.43	23.592	0.308	0.006	0.025	99.034
AL20-30_BSE-image2_pyroxene_5	Grain 1; Relict core	52.383	0.015	1.604	0.04	19.976	0.429	23.394	0.335	-0.001	0.011	98.186
AL20-30_BSE-image2_pyroxene_6	Grain 1; Relict core	52.924	0.051	1.374	0.107	19.859	0.46	23.758	0.36	0.005	0.01	98.908
AL20-30_BSE-image3_amf_1	Alteration of cpx/opx	51.249	0.223	6.92	0.062	8.132	0.1	17.517	11.684	0.651	0.137	96.675
AL20-30_BSE-image3_amf_2	Alteration of cpx/opx	51.883	0.208	6.238	0.062	7.855	0.083	18.035	11.637	0.561	0.116	96.678
AL20-30_BSE-image3_amf_3	Alteration of cpx/opx	52.047	0.178	6.05	0.12	7.904	0.167	18.005	12.008	0.503	0.095	97.077
AL20-30_BSE-image3_amf_4	Alteration of cpx/opx	51.693	0.172	6.39	0.13	7.702	0.092	17.876	11.868	0.612	0.109	96.644
AL20-30_BSE-image3_amf_5	Alteration of cpx/opx	53.704	0.106	4.295	0.088	7.118	0.097	19.001	11.848	0.348	0.057	96.662
AL20-30_BSE-image3_cpx_1	Grain 1; relict core	52.912	0.201	1.788	0.099	5.931	0.221	15.057	22.771	0.198	0.015	99.193
AL20-30_BSE-image3_cpx_2	Grain 1; relict core	52.76	0.13	1.974	0.156	5.988	0.127	15.099	22.417	0.22	0.013	98.884
AL20-30_BSE-image3_cpx_3	Grain 1; relict core	53.174	0.171	1.588	0.127	5.851	0.211	15.179	22.957	0.173	0.012	99.443
AL20-30_BSE-image3_cpx_4	Grain 1; relict core	52.772	0.158	2.075	0.129	5.822	0.135	15.06	22.553	0.216	0.017	98.937
AL20-30_BSE-image3_cpx_5	Grain 1; relict core	53.245	0.156	1.594	0.11	5.635	0.151	15.488	23.04	0.194	0.014	99.627
AL20-30_BSE-image3_garnet_1	Alteration plag/amph	38.967	0.007	22.272	0.003	22.497	1.34	7.508	6.803	-0.004	0.015	99.408
AL20-30_BSE-image3_garnet_2	Alteration plag/amph	39.029	0.028	22.402	-0.008	21.508	1.358	7.406	7.837	-0.001	0.01	99.569
AL20-30_BSE-image3_garnet_3	Alteration plag/amph	38.829	0.037	22.455	0.028	22.516	1.349	7.447	6.908	-0.009	0.019	99.579
AL20-30_BSE-image3_plg_1	Interstitial	44.58	0.007	35.106	-0.017	0.058	0.005	0.009	18.485	0.733	0.022	98.988
AL20-30_BSE-image3_plg_2	Interstitial	45.017	-0.016	34.944	0.002	0.065	-0.029	-0.012	18.302	0.89	0.017	99.18
AL20-30_BSE-image3_plg_3	Interstitial	44.9	0.002	35.274	0.011	0.08	-0.026	-0.008	18.314	0.86	0.015	99.422
AL20-30_BSE-image3_plg_4	Interstitial	44.733	0.005	35.231	-0.022	0.094	-0.006	0.011	18.521	0.751	0.028	99.346
AL20-30_BSE-image3_pyroxene_1	Grain 1; Relict core	53.008	0.061	1.147	0.063	19.902	0.432	23.79	0.317	0	0.019	98.739
AL20-30_BSE-image3_pyroxene_2	Grain 1; Relict core	53.288	0.044	1.156	0.035	19.534	0.416	24.079	0.322	0.016	0.015	98.905
AL20-30_BSE-image3_pyroxene_3	Grain 1; Relict core	53.039	0.068	1.346	0.055	19.619	0.398	24.077	0.306	0.005	0.011	98.924
AL20-30_BSE-image3_pyroxene_4	Grain 1; Relict core	52.901	0.129	1.41	0.051	19.619	0.464	23.861	0.356	0.002	0.021	98.814
AL20-30_BSE-image3_pyroxene_5	Grain 2; relict core 1	53.018	0.057	1.064	0.047	20.123	0.477	23.663	0.299	-0.018	0.022	98.752
AL20-30_BSE-image3_pyroxene_6	Grain 2; relict core 2	52.796	0.313	1.281	0.082	19.936	0.44	23.664	0.425	-0.005	0.016	98.948
AL20-32_BSE-image1_amf_1	Grain 1; meta rim	42.296	0.209	17.458	0.005	8.598	0.165	14.562	10.967	2.572	0.687	97.519
AL20-32_BSE-image1_amf_2	Grain 1; meta rim	41.994	0.214	17.53	-0.026	8.45	0.169	14.533	10.87	2.64	0.768	97.142
AL20-32_BSE-image1_amf_3	Grain 1; meta rim	41.873	0.136	17.99	0.016	8.831	0.126	14.398	11.006	2.639	0.744	97.759
AL20-32_BSE-image1_amf_4	Grain 1; meta rim	42.431	0.091	17.28	0.01	8.579	0.17	14.544	10.878	2.673	0.703	97.359
AL20-32_BSE-image1_amf_5	Grain 2; meta rim	43.117	0.211	16.298	-0.015	8.697	0.11	14.949	10.806	2.497	0.67	97.34
AL20-32_BSE-image1_amf_6	Grain 2; meta rim	43.098	0.395	16.261	-0.009	8.693	0.141	14.948	10.679	2.605	0.616	97.427
AL20-32_BSE-image1_plg_1	Grain 1; Lighter region	51.901	0.037	30.558	-0.001	0.096	-0.009	0	12.937	4.046	0.065	99.63
AL20-32_BSE-image1_plg_2	Grain 1; Lighter region	48.589	0	32.956	-0.013	0.005	-0.041	0.003	15.653	2.485	0.017	99.654
AL20-32_BSE-image1_plg_3	Grain 1; darker region	55.025	0.035	28.667	-0.01	0.016	-0.011	-0.009	10.631	5.403	0.07	99.817
AL20-32_BSE-image1_plg_4	Grain 1; darker region	54.731	0.012	28.683	0	0.006	-0.039	0.003	10.949	5.136	0.088	99.569
AL20-32_BSE-image1_plg_5	Grain 2; lighter region	48.264	0.118	33.036	-0.018	0.047	-0.022	0.006	15.704	2.389	0.027	99.551
AL20-32_BSE-image1_plg_6	Grain 2; lighter region	48.373	0.009	33.286	-0.015	0.018	0.01	-0.004	15.815	2.389	0.032	99.913
AL20-32_BSE-image1_pyroxene_1	Grain 1; Relict core	52.396	-0.016	4.519	-0.026	17.329	0.401	25.869	0.097	0.011	0.007	100.587
AL20-32_BSE-image1_pyroxene_2	Grain 1; Relict core	53.941	0.011	2.103	-0.02	17.142	0.343	26.989	0.169	0.006	0.021	100.705
AL20-32_BSE-image1_pyroxene_3	Grain 1; Relict core	53.053	0.027	3.289	0.002	17.07	0.343	26.346	0.124	0.01	0.018	100.282
AL20-32_BSE-image1_pyroxene_4	Grain 1; Relict core	53.481	0.033	2.856	-0.009	17.128	0.38	26.475	0.117	-0.002	0.008	100.467
AL20-32_BSE-image1_pyroxene_5	Grain 1; Relict core	53.87	0.002	1.727	0.019	17.115	0.441	27.051	0.165	0.004	0.005	100.399
AL20-32_BSE-image1_pyroxene_6	Grain 2; relict core	53.643	0.042	2.261	0.006	16.919	0.348	26.862	0.14	-0.013	0.017	100.225
AL20-32_BSE-image1_pyroxene_7	Grain 2; relict core	54.08	0.016	2.167	0	16.92	0.336	26.913	0.158	-0.001	0.006	100.595
AL20-32_BSE-image2_amf_1	Grain 1; meta rim on pyroxene	42.111	0.111	17.278	-0.043	8.805	0.162	14.356	10.795	2.619	0.713	96.907
AL20-32_BSE-image2_amf_2	Grain 1; meta rim on pyroxene	43.221	0.217	16.137	0.002	8.794	0.136	14.995	10.774	2.477	0.604	97.357
AL20-32_BSE-image2_amf_3	Grain 1; meta rim on pyroxene	43.199	0.249	16.268	-0.004	8.799	0.176	14.831	10.847	2.547	0.605	97.517
AL20-32_BSE-image2_amf_4	Grain 1; meta rim on pyroxene	43.089	0.235	16.113	0.009	9.138	0.129	14.881	10.822	2.547	0.599	97.562
AL20-32_BSE-image2_amf_5	Grain 1; meta rim on pyroxene	43.269	0.254	15.731	0.034	8.789	0.141	15.04	10.851	2.462	0.64	97.211
AL20-32_BSE-image2_amf_6	Grain 1; meta rim on pyroxene	46.513	0.251	12.027	0.009	8.71	0.174	16.436	10.817	2.024	0.413	97.374
AL20-32_BSE-image2_amf_7	Grain 1; meta rim on pyroxene	45.433	1.203	12.371	-0.006	9.095	0.13	15.458	10.769	2.252	0.509	97.214
AL20-32_BSE-image2_plg_1	Grain 1; rim	52.158	0.016	30.741	0.026	0.053	0.004	0	12.818	4.182	0.066	100.064
AL20-32_BSE-image2_plg_10	Grain 2; light core	50.764	0.009	31.568	0.015	0.006	0.017	-0.002	13.991	3.448	0.047	99.863
AL20-32_BSE-image2_plg_11	Grain 2; light core	50.512	0.025	31.927	-0.024	0.03	0.02	-0.005	14.138	3.339	0.052	100.014
AL20-32_BSE-image2_plg_12	Grain 2; light core	50.184	-0.007	32.136	0.029	0.049	0.006	-0.001	14.57	3.16	0.045	100.171
AL20-32_BSE-image2_plg_13	Grain 2; light core	48.765	-0.023	33.153	0.019	0.005	0.001	0.009	15.515	2.544	0.027	100.015
AL20-32_BSE-image2_plg_14	Grain 2; dark rim	52.239	0.087	30.611	-0.006	0.031	0.006	-0.001	12.762	4.092	0.075	99.896
AL20-32_BSE-image2_plg_15	Grain 2; dark rim	52.406	-0.011	30.481	-0.031	0.048	0.001	0.008	12.622	4.26	0.059	99.843
AL20-32_BSE-image2_plg_16	Grain 2; darkest rim	58.634	0.002	26.378	0.007	0.032	-0.004	0.001	7.846	6.921	0.123	99.94
AL20-32_BSE-image2_plg_2	Grain 1; rim	51.956	0.014	30.843	0.05	0.011	-0.022	-0.007	13.046	3.973	0.07	99.934
AL20-32_BSE-image2_plg_3	Grain 1; mid zone	48.352	0.021	33.263	-0.003	0	0.009	0.003	16.031	2.371	0.029	100.076
AL20-32_BSE-image2_plg_4	Grain 1; mid zone	51.198	-0.002	31.273	-0.005	0.028	-0.007	0.004	13.723	3.641	0.048	99.901
AL20-32_BSE-image2_plg_5	Grain 1; core	53.87	0.009	29.743	0.02	0.029	0.005	-0.008	11.517	4.782	0.081	100.048
AL20-32_BSE-image2_plg_6	Grain 1; core	53.277	0.023	30.147	0.009	0.052	0.022	0.001	12.118	4.492	0.072	100.213
AL20-32_BSE-image2_plg_7	Grain 1; core	52.043	-0.053	30.717	0.014	0.013	0.007	-0.002	12.922	4.004	0.061	99.726
AL20-32_BSE-image2_plg_8	Grain 1; mid zone	50.216	-0.005	31.866	-0.022	0.023	0.013	-0.01	14.529	3.101	0.047	99.758
AL20-32_BSE-image2_plg_9	Grain 1; mid zone	48.918	-0.009	32.907	0.006	0.032	0.001	-0.005	15.3	2.665	0.037	99.852
AL20-32_BSE-image2_pyroxene_1	Grain 1; Relict core	52.654	0.009	4.136	-0.015	17.909	0.427	25.624	0.135	0.003	0.018	100.9
AL20-32_BSE-image2_pyroxene_2	Grain 1; Relict core	54.072	-0.016	1.489	0.02	17.515	0.357	26.62	0.161	0.001	0.018	100.237
AL20-32_BSE-image2_pyroxene_3	Grain 1; Relict core	53.839	-0.009	1.719	-0.008	18.042	0.423	26.362	0.178	0.008	0.01	100.564
AL20-32_BSE-image2_pyroxene_4	Grain 1; Relict core	54.106	0	1.141	-0.016	17.954	0.374	26.462	0.188	-0.001	0.015	100.223
AL20-32_BSE-image2_pyroxene_5	Grain 1; Relict core	52.953	-0.024	3.096	0.013	17.842	0.349	25.773	0.196	0	0.022	100.22
AL20-32_BSE-image2_pyroxene_6	Grain 2; relict core	54.161	-0.013	1.367	-0.033	17.987	0.426	26.382	0.218	0.004	0.014	100.513
AL20-32_BSE-image2_pyroxene_7	Grain 2; relict core	53.122	0.033	3.057	-0.018	18.356	0.438	25.755	0.116	0.002	0.005	100.866
AL20-32_BSE-image3_amf_1	Meta rim on olivine	55.401	0.031	0.828	0.02	13.98	0.3	29.802	0.2	0.004	0.01	100.576
AL20-32_BSE-image3_amf_2	Meta rim on olivine	55.696	0.031	0.584	0.027	14.042	0.323	29.909	0.214	0.009	0.019	100.854
AL20-32_BSE-image3_amf_3	Meta rim on olivine	55.067	0.056	1.047	0.069	13.808	0.317	29.871	0.198	-0.009	0.016	100.44
AL20-32_BSE-image3_amfed-cpx_1	Grain 1	50.736	1.445	4.592	0.723	5.314	0.181	14.624	21.921	0.749	0.03	100.315
AL20-32_BSE-image3_amfed-cpx_2	Grain 1	50.607	0.699	5.639	0.866	4.972	0.143	14.96	20.713	1.036	0.058	99.693
AL20-32_BSE-image3_amfed-cpx_3	Grain 1	52.065	0.691	3.873	0.703	4.338	0.145	15.344	22.325	0.703	0.024	100.211
AL20-32_BSE-image3_amfed-cpx_4	Grain 1	51.674	0.635	4.359	0.689	4.685	0.163	14.896	22.361	0.704	0.032	100.198
AL20-32_BSE-image3_amfed-cpx_5	Grain 1	51.564	0.674	4.475	0.828	4.623	0.114	14.703	22.56	0.725	0.026	100.292
AL20-32_BSE-image3_amfed-cpx_6	Grain 1	52.199	0.518	3.642	0.706	4.712	0.169	15.011	22.452	0.695	0.022	100.126
AL20-32_BSE-image3_olivine_1	Relict grain	38.346	-0.022	0.001	0.002	22.689	0.282	39.451	0.009	0.007	0.016	100.781
AL20-32_BSE-image3_olivine_2	Relict grain	38.136	-0.015	0.004	-0.022	22.781	0.335	39.207	0.02	-0.003	0.01	100.453
AL20-32_BSE-image3_olivine_3	Relict grain	38.191	0.013	-0.022	-0.026	23.236	0.309	39.202	0	0.001	0.017	100.921
AL20-32_BSE-image3_olivine_4	Relict grain	38.178	-0.002	0.002	0.006	22.644	0.33	39.555	0.015	0.001	0.013	100.742
AL20-32_BSE-image3_olivine_5	Relict grain	38.228	-0.013	0	-0.022	22.771	0.311	39.448	0.016	-0.001	0.009	100.747
AL20-32_BSE-image3_olivine_6	Relict grain	38.232	-0.017	0.011	-0.008	22.816	0.295	39.176	0.009	-0.004	0.007	100.517
AL20-32_BSE-image4_??mica??_1	Grain 1	37.197	2.076	18.943	-0.014	8.454	0.036	19.387	0.015	0.453	8.928	95.475
AL20-32_BSE-image4_??mica??_2	Grain 1	37.15	2.043	18.923	0.022	8.548	0.02	19.42	0.003	0.453	9.01	95.592
AL20-32_BSE-image4_??mica??_3	Grain 1	37.033	2.123	18.686	0.01	8.38	0.02	19.102	0.022	0.46	8.975	94.811
AL20-32_BSE-image4_??mica??_4	Grain 1	36.837	1.979	18.825	-0.012	8.445	0.015	18.944	0.018	0.428	9.032	94.511
AL20-32_BSE-image4_??mica??_5	Grain 1	36.873	1.818	18.909	-0.023	8.461	0.018	19.007	0.009	0.456	8.98	94.508
AL20-32_BSE-image4_amf_1	Grain 1	41.156	0.829	17.968	0.008	8.95	0.131	13.8	10.888	2.698	0.723	97.151
AL20-32_BSE-image4_amf_2	Grain 1	41.664	0.672	17.697	-0.022	8.594	0.145	14.15	10.945	2.608	0.768	97.221
AL20-32_BSE-image4_amf_3	Grain 1	41.725	0.537	17.897	-0.012	8.813	0.155	14.107	10.711	2.64	0.736	97.309
AL20-32_BSE-image4_amf_4	Grain 1	41.787	0.924	17.367	-0.03	8.668	0.17	14.333	10.703	2.658	0.728	97.308
AL20-32_BSE-image4_amf_5	Grain 1	41.92	0.906	17.197	-0.015	8.676	0.142	14.273	10.806	2.641	0.732	97.278
AL20-32_BSE-image4_amf_6	Grain 1	42.292	0.852	17.152	-0.017	8.807	0.171	14.398	10.734	2.679	0.703	97.771
AL20-32_BSE-image4_plg_1	Grain 1	52.208	-0.023	30.637	-0.005	0.062	0.027	-0.001	12.674	4.165	0.053	99.797
AL20-32_BSE-image4_plg_2	Grain 1	52.44	0.002	30.695	0.017	0.08	0.005	0	12.522	4.21	0.057	100.028
AL20-32_BSE-image4_plg_3	Grain 1	53.164	0.018	29.999	-0.001	0.079	0.034	-0.004	11.881	4.61	0.076	99.856
AL20-32_BSE-image4_plg_4	Grain 1	54.441	-0.048	29.356	-0.024	0.059	0.034	0.006	11.173	5.021	0.067	100.085
AL20-32_BSE-image4_plg_5	Grain 2; dark rim	52.433	0.041	30.513	-0.007	0.001	0.03	-0.003	12.588	4.266	0.062	99.924
AL20-32_BSE-image4_plg_6	Grain 2; light core	49.051	0.018	32.877	-0.015	0.022	0.011	0.005	15.17	2.744	0.052	99.935
AL20-32_BSE-image4_plg_7	Grain 2; light core	51.695	0.002	30.245	0.007	0.073	0.019	0.01	12.975	4.08	0.062	99.168
AL20-32_BSE-image4_plg_8	Grain 2; light core	47.887	0.027	33.536	-0.006	-0.018	-0.006	0	15.864	2.272	0.031	99.587
AL20-32_BSE-image4_pyroxene_1	Grain 1	53.802	0.071	1.662	-0.026	16.588	0.384	27.04	0.124	-0.008	0.015	99.652
AL20-32_BSE-image4_pyroxene_2	Grain 1	54.285	0.024	1.656	0.013	16.973	0.369	27.106	0.14	0.006	0.017	100.589
AL20-32_BSE-image4_pyroxene_3	Grain 1	54.238	0.06	1.671	0.019	16.76	0.441	27.256	0.121	0.017	0.025	100.608
AL20-32_BSE-image4_pyroxene_4	Grain 1	54.122	0.015	1.817	-0.022	16.827	0.35	27.074	0.157	0.001	0.01	100.351
AL20-32_BSE-image4_pyroxene_5	Grain 1	54.372	0.04	1.543	0	16.851	0.362	27.232	0.121	-0.002	0.011	100.53
AL20-32_BSE-image4_pyroxene_6	Grain 1	53.983	-0.022	2.354	0.008	16.904	0.329	26.883	0.164	0.024	0.007	100.634
AL20-32_BSE-image4_pyroxene_7	Grain 1	53.33	-0.024	3.143	0.013	16.835	0.397	26.285	0.137	0.013	0.014	100.143
AL20-36_BSE-image1_amf_1	Grain 1; rim alteration of CPX	48.55	0.368	9.055	0.007	11.507	0.202	15.098	11.581	0.713	0.056	97.137
AL20-36_BSE-image1_amf_2	Grain 1; rim alteration of CPX	48.629	0.331	8.85	-0.004	11.724	0.225	15.131	11.648	0.686	0.061	97.281
AL20-36_BSE-image1_amf_3	Grain 1; rim alteration of CPX	47.274	0.359	10.961	0.041	11.52	0.256	14.383	11.544	0.799	0.041	97.178
AL20-36_BSE-image1_amf_4	Grain 1; rim alteration of CPX	48.229	0.457	9.426	0.019	11.79	0.181	14.848	11.579	0.731	0.055	97.315
AL20-36_BSE-image1_amf_5	Grain 1; rim alteration of CPX	48.804	0.372	8.909	-0.006	11.155	0.218	15.621	11.59	0.677	0.065	97.405
AL20-36_BSE-image1_cpx_1	Grain 1; Relict core 1	52.529	0.154	1.951	0.006	7.865	0.268	14.532	22.716	0.164	0.021	100.206
AL20-36_BSE-image1_cpx_2	Grain 1; Relict core 1	52.305	0.176	1.917	-0.001	7.716	0.277	14.543	22.653	0.153	0.015	99.754
AL20-36_BSE-image1_cpx_3	Grain 1; Relict core 1	52.581	0.249	2.012	-0.009	7.85	0.236	14.435	22.758	0.161	0.016	100.289
AL20-36_BSE-image1_cpx_4	Grain 1; Relict core 2	52.733	0.043	1.171	0.009	22.691	0.644	22.276	0.372	0.001	0.024	99.964
AL20-36_BSE-image1_cpx_5	Grain 1; Relict core 2	52.416	0.048	1.284	0.003	23.16	0.66	22.236	0.43	-0.005	-0.006	100.226
AL20-36_BSE-image1_cpx_6	Grain 1; Relict core 2	52.289	0.056	1.24	-0.035	22.871	0.641	21.919	0.469	-0.005	0.012	99.457
AL20-36_BSE-image1_plg_1	Grain 1	44.091	-0.03	36.156	0.01	0.099	-0.002	0.028	19.246	0.441	0.016	100.055
AL20-36_BSE-image1_plg_10	Grain 2	44.139	-0.005	36	-0.004	0.246	0.021	0.344	19.304	0.341	0.005	100.391
AL20-36_BSE-image1_plg_2	Grain 1	44.221	0.02	36.155	-0.012	0.1	-0.021	-0.011	19.134	0.45	0.022	100.058
AL20-36_BSE-image1_plg_3	Grain 1	44.683	-0.002	36.092	-0.014	0.088	0.002	-0.003	18.876	0.554	0.004	100.28
AL20-36_BSE-image1_plg_4	Grain 1	44.509	0.005	36.247	0.004	0.07	0.011	-0.006	18.905	0.518	0.016	100.279
AL20-36_BSE-image1_plg_5	Grain 2	44.5	0.05	35.934	-0.026	0.085	0.044	-0.001	18.985	0.569	0.012	100.152
AL20-36_BSE-image1_plg_6	Grain 2	44.575	-0.005	36.081	-0.014	0.093	0.006	-0.003	18.749	0.615	0.005	100.102
AL20-36_BSE-image1_plg_7	Grain 2	44.692	-0.034	36.094	-0.004	0.107	-0.006	-0.001	18.713	0.628	0.01	100.199
AL20-36_BSE-image1_plg_8	Grain 2	44.698	0.05	36.023	0.007	0.137	-0.008	-0.003	18.824	0.621	0.025	100.374
AL20-36_BSE-image1_plg_9	Grain 2	44.697	-0.014	36.318	0.004	0.106	0.022	0.004	18.995	0.566	0.014	100.712
AL20-36_BSE-image1_pyroxene_1	Grain 1	52.205	0.056	1.089	0.035	23.642	0.7	21.754	0.676	0.009	0.006	100.172
AL20-36_BSE-image1_pyroxene_10	Grain 1	52.473	0.017	1.121	-0.022	23.531	0.641	21.93	0.533	-0.011	0.011	100.224
AL20-36_BSE-image1_pyroxene_2	Grain 1	52.536	0.028	1.216	-0.006	22.396	0.669	21.413	2.229	0.007	0.014	100.502
AL20-36_BSE-image1_pyroxene_3	Grain 1	52.315	0.043	1.245	0.021	23.994	0.655	21.765	0.446	-0.011	0.016	100.489
AL20-36_BSE-image1_pyroxene_4	Grain 1	52.404	0.028	1.268	0.032	23.522	0.626	21.937	0.459	-0.01	0.017	100.283
AL20-36_BSE-image1_pyroxene_5	Grain 1	52.458	0.059	1.149	-0.038	23.563	0.639	21.982	0.444	0	0.017	100.273
AL20-36_BSE-image1_pyroxene_6	Grain 1	52.585	0.044	1.127	-0.024	21.377	0.618	21.19	3.194	0.019	0.015	100.145
AL20-36_BSE-image1_pyroxene_7	Grain 1	52.644	0.072	1.16	0.015	23.119	0.638	21.739	1.039	0.001	0.016	100.443
AL20-36_BSE-image1_pyroxene_8	Grain 1	52.58	0.002	1.158	-0.013	23.215	0.629	21.982	0.666	-0.004	0.012	100.227
AL20-36_BSE-image1_pyroxene_9	Grain 1	52.414	0.085	1.125	0.007	23.134	0.619	21.948	0.419	0	0.022	99.773
AL20-36_BSE-image2_amf_1	Grain 1; meta rim on pyroxene	51.225	0.218	6.162	0.012	11.095	0.203	16.457	11.542	0.373	0.051	97.338
AL20-36_BSE-image2_amf_10	Grain 1; meta rim on pyroxene	55.175	0.004	0.901	0.016	18.807	0.727	20.985	0.646	0.044	0.019	97.324
AL20-36_BSE-image2_amf_11	Grain 1; meta rim on pyroxene	53.131	0.068	1.482	0.012	8.166	0.245	14.446	22.784	0.157	0.004	100.495
AL20-36_BSE-image2_amf_2	Grain 1; meta rim on pyroxene	50.842	0.198	5.8	0.014	12.264	0.178	16.161	11.1	0.366	0.04	96.963
AL20-36_BSE-image2_amf_3	Grain 1; meta rim on pyroxene	55.267	0.074	1.586	-0.001	17.264	0.687	21.685	0.733	0.085	0.015	97.395
AL20-36_BSE-image2_amf_4	Grain 1; meta rim on pyroxene	49.071	0.385	8.341	0	11.677	0.204	15.404	11.527	0.648	0.058	97.315
AL20-36_BSE-image2_amf_5	Grain 1; meta rim on pyroxene	48.216	0.369	9.639	0.007	11.848	0.208	14.475	11.655	0.69	0.069	97.176
AL20-36_BSE-image2_amf_6	Grain 1; meta rim on pyroxene	49.725	0.254	7.332	0.006	11.555	0.183	15.598	11.66	0.53	0.054	96.897
AL20-36_BSE-image2_amf_7	Grain 1; meta rim on pyroxene	54.628	0.022	1.81	-0.034	18.156	0.679	21.062	1.275	0.106	0.017	97.721
AL20-36_BSE-image2_amf_8	Grain 1; meta rim on pyroxene	48.209	0.388	9.317	0.013	12.244	0.199	14.72	11.586	0.709	0.075	97.46
AL20-36_BSE-image2_amf_9	Grain 1; meta rim on pyroxene	55.265	0.002	0.945	-0.003	18.378	0.662	21.471	0.373	0.025	0.014	97.132
AL20-36_BSE-image2_pyroxene_1	Grain 1; Relict core	52.34	-0.002	1.14	0.005	23.582	0.663	21.675	0.52	-0.005	0.016	99.934
AL20-36_BSE-image2_pyroxene_2	Grain 1; Relict core	52.316	0.052	1.21	-0.002	23.53	0.656	21.888	0.468	0.007	0.005	100.13
AL20-36_BSE-image2_pyroxene_3	Grain 1; Relict core	52.254	0.078	1.29	-0.012	23.552	0.577	21.937	0.407	-0.017	0.023	100.089
AL20-36_BSE-image2_pyroxene_4	Grain 1; Relict core	52.445	0.037	1.211	0.016	24.206	0.587	21.696	0.422	-0.012	0.009	100.617
AL20-36_BSE-image2_pyroxene_5	Grain 1; Relict core	52.419	0.024	1.209	0.003	24.347	0.698	21.327	0.429	-0.006	0.021	100.471
AL20-36_BSE-image2_pyroxene_6	Grain 1; Relict core	52.192	0.045	1.012	0.031	24.066	0.715	21.23	1.04	0.014	0.014	100.359
AL20-36_BSE-image2_pyroxene_7	Grain 1; Relict core	52.232	0.028	1.221	-0.007	24.032	0.632	21.655	0.449	-0.001	0.008	100.249
AL20-36_BSE-image2_pyroxene_8	Grain 1; Relict core	52.229	0.017	1.296	0.001	23.71	0.629	21.489	0.715	0.007	0.017	100.11
AL20-36_BSE-image2_pyroxene_9	Grain 1; Relict core	51.971	0.056	1.249	0.002	23.825	0.586	21.372	0.896	0.008	0.017	99.982
AL20-36_BSE-image3_amf_1	Alteration of opx/cpx/plag	49.771	0.34	7.468	0.016	11.502	0.176	15.707	11.635	0.55	0.057	97.222
AL20-36_BSE-image3_amf_2	Alteration of opx/cpx/plag	51.571	0.191	5.793	0.013	10.911	0.182	16.704	11.599	0.378	0.048	97.39
AL20-36_BSE-image3_amf_3	Alteration of opx/cpx/plag	49.766	0.325	7.556	0.024	11.363	0.177	15.673	11.721	0.5	0.06	97.165
AL20-36_BSE-image3_amf_4	Alteration of opx/cpx/plag	49.47	0.38	7.642	0.021	11.703	0.196	15.418	11.79	0.564	0.05	97.234
AL20-36_BSE-image3_amf_5	Alteration of opx/cpx/plag	50.944	0.216	6.615	-0.042	10.818	0.186	16.253	12.143	0.443	0.046	97.622
AL20-36_BSE-image3_amf_6	Alteration of opx/cpx/plag	49.427	0.44	8.067	0.005	11.844	0.155	15.314	11.726	0.558	0.062	97.598
AL20-36_BSE-image3_amf_7	Alteration of opx/cpx/plag	48.695	0.436	8.665	0.001	11.803	0.168	14.839	11.836	0.608	0.07	97.121
AL20-36_BSE-image3_amfed-cpx_1	Grain 1; Relict core	52.389	0.201	1.87	0.002	7.837	0.26	14.478	22.527	0.172	0.013	99.749
AL20-36_BSE-image3_amfed-cpx_2	Grain 1; Relict core	52.884	0.165	1.67	0.005	7.927	0.304	14.549	22.776	0.17	0.014	100.464
AL20-36_BSE-image3_amfed-cpx_3	Grain 1; Relict core	52.423	0.208	1.902	-0.009	7.837	0.243	14.561	22.638	0.162	0.011	99.976
AL20-36_BSE-image3_amfed-cpx_4	Grain 1; Relict core	53.062	0.07	1.287	0.011	7.528	0.251	14.833	22.94	0.134	0.018	100.134
AL20-36_BSE-image3_amfed-cpx_5	Grain 2; relict core	52.705	0.14	1.87	0.038	7.675	0.278	14.729	22.803	0.157	0.009	100.404
AL20-36_BSE-image3_amfed-cpx_6	Grain 2; relict core	52.622	0.161	1.825	-0.009	7.67	0.227	14.72	22.638	0.181	0.009	100.044
AL20-36_BSE-image3_plg_1	Grain 1	44.152	0.039	36.18	-0.01	0.075	-0.022	0.006	19.155	0.464	0.017	100.056
AL20-36_BSE-image3_plg_2	Grain 1	43.968	-0.014	35.93	-0.036	0.1	0.011	0.002	19.144	0.415	0.015	99.535
AL20-36_BSE-image3_plg_3	Grain 1	44.225	-0.02	36.156	0.012	0.065	-0.029	0.006	18.917	0.514	0.014	99.86
AL20-36_BSE-image3_plg_4	Grain 1	44.109	0.007	36.191	-0.014	0.052	0	0	19.115	0.39	0.01	99.86
AL20-36_BSE-image3_plg_5	Grain 2	44.555	0.009	36.186	-0.03	0.111	-0.032	0.004	18.994	0.599	0.009	100.405
AL20-36_BSE-image3_plg_6	Grain 2	44.633	0.005	35.976	0.016	0.089	0.007	-0.009	18.82	0.633	0.004	100.174
AL20-36_BSE-image3_plg_7	Grain 2	44.473	0.016	35.945	-0.009	0.117	-0.001	-0.003	19.071	0.557	0.011	100.177
AL20-36_BSE-image3_pyroxene_1	Grain 1; Relict core 1	52.516	0.062	1.183	0.015	23.637	0.552	21.927	0.468	-0.005	0.013	100.368
AL20-36_BSE-image3_pyroxene_10	Grain 1; Relict core 2	52.425	0.028	1.306	0.019	23.215	0.603	22.111	0.386	-0.002	0.016	100.107
AL20-36_BSE-image3_pyroxene_2	Grain 1; Relict core 1	52.568	0.047	1.213	0.028	22.867	0.595	22.216	0.779	0.001	0.005	100.319
AL20-36_BSE-image3_pyroxene_3	Grain 1; Relict core 1	52.454	0.011	1.28	0.018	22.916	0.58	22.493	0.423	-0.008	0.03	100.197
AL20-36_BSE-image3_pyroxene_4	Grain 1; Relict core 1	52.524	0.325	1.11	0.012	23.412	0.62	22.414	0.369	-0.007	0.012	100.791
AL20-36_BSE-image3_pyroxene_5	Grain 1; Relict core 1	52.771	0.088	1.16	0.016	23.426	0.666	22.141	0.387	0	0.019	100.674
AL20-36_BSE-image3_pyroxene_6	Grain 1; Relict core 2	52.333	0.026	1.11	0.006	23.266	0.597	22.033	0.384	0.002	0.015	99.772
AL20-36_BSE-image3_pyroxene_7	Grain 1; Relict core 2	52.23	0.035	1.143	-0.007	22.585	0.648	21.58	1.518	0.013	0.01	99.755
AL20-36_BSE-image3_pyroxene_8	Grain 1; Relict core 2	52.313	0.019	1.393	0.044	22.797	0.577	22.341	0.481	0.007	0.003	99.975
AL20-36_BSE-image3_pyroxene_9	Grain 1; Relict core 2	52.275	0.062	1.216	-0.007	23.219	0.589	22.068	0.412	0.004	0.022	99.86
AL20-37_BSE-image1_amf?_1	Grain 1	51.635	0.164	6.662	0.128	7.947	0.145	18.295	12.111	0.504	0.025	97.616
AL20-37_BSE-image1_amf?_2	Grain 1	51.525	0.155	6.362	0.168	8.006	0.155	18.308	11.991	0.473	0.036	97.179
AL20-37_BSE-image1_amf?_3	Grain 1	53.83	0.074	4.206	0.145	7.291	0.131	19.67	11.942	0.288	0.022	97.599
AL20-37_BSE-image1_amf?_4	Grain 1	53.58	0.061	4.623	0.11	7.541	0.17	19.544	11.869	0.345	0.021	97.864
AL20-37_BSE-image1_amf?_5	Grain 2	55.803	0.103	2.12	0.101	6.574	0.133	21.062	12.066	0.141	0.021	98.124
AL20-37_BSE-image1_amf?_6	Grain 2	55.737	0.099	2.259	0.057	6.709	0.15	20.842	12.056	0.129	0.017	98.055
AL20-37_BSE-image1_cpx_1	Grain 1	53.446	0.104	1.585	0.153	5.431	0.224	16.042	23.197	0.06	0.011	100.253
AL20-37_BSE-image1_cpx_2	Grain 1	53.566	0.116	1.338	0.135	5.136	0.204	16.105	23.522	0.046	0.009	100.177
AL20-37_BSE-image1_cpx_3	Grain 2	53.933	0.041	0.829	0.103	5.234	0.202	16.422	23.679	0.051	0.006	100.5
AL20-37_BSE-image1_cpx_4	Grain 2	53.638	0.113	1.478	0.139	5.573	0.187	16.109	23.322	0.069	0.011	100.639
AL20-37_BSE-image1_cpx_5	Grain 3	53.353	0.152	1.577	0.154	5.651	0.22	16.089	23.504	0.041	0.003	100.744
AL20-37_BSE-image1_cpx_6	Grain 3	53.58	0.093	1.42	0.143	5.295	0.195	16.136	23.475	0.064	0.016	100.417
AL20-37_BSE-image1_cpx_7	Grain 3	53.718	0.075	1.361	0.149	4.941	0.186	16.291	23.6	0.052	0.01	100.383
AL20-37_BSE-image1_cpx_8	Grain 3	53.112	0.057	1.596	0.192	5.538	0.166	15.935	23.299	0.081	0.017	99.993
AL20-37_BSE-image1_cpx_9	Grain 3	51.708	0.275	1.827	0.358	8.31	0.207	15.653	21.612	0.075	0.009	100.034
AL20-37_BSE-image1_pyroxene1	Grain 1	53.886	0.12	1.168	0.106	18.619	0.544	25.781	0.548	-0.007	0.003	100.768
AL20-37_BSE-image1_pyroxene10	Grain 3	53.87	0.026	1.168	0.112	18.576	0.536	25.852	0.331	-0.005	0.007	100.473
AL20-37_BSE-image1_pyroxene11	Grain 4	54.006	0.065	1.136	0.106	18.302	0.499	26.09	0.334	-0.008	0.011	100.541
AL20-37_BSE-image1_pyroxene12	Grain 4	53.953	0.033	1.183	0.077	18.501	0.499	25.87	0.38	-0.008	0.015	100.503
AL20-37_BSE-image1_pyroxene2	Grain 1	53.842	0.033	1.3	0.091	18.116	0.414	26.123	0.323	0.006	0.003	100.251
AL20-37_BSE-image1_pyroxene3	Grain 1	53.887	0.039	1.385	0.112	18.325	0.441	26.097	0.305	0.001	0.014	100.606
AL20-37_BSE-image1_pyroxene4	Grain 1	53.889	-0.009	1.231	0.08	18.41	0.523	26.075	0.44	0.008	0.012	100.659
AL20-37_BSE-image1_pyroxene5	Grain 1	53.878	0.044	1.194	0.075	18.428	0.482	25.968	0.382	-0.01	0.017	100.458
AL20-37_BSE-image1_pyroxene6	Grain 2	54.175	0.002	0.824	0.017	18.611	0.574	25.974	0.294	-0.001	0.014	100.484
AL20-37_BSE-image1_pyroxene7	Grain 2	53.942	0.015	1.156	0.064	18.757	0.513	26.111	0.336	-0.012	0.014	100.896
AL20-37_BSE-image1_pyroxene8	Grain 2	54.028	0.022	0.924	0.06	18.734	0.578	25.943	0.302	-0.011	0.021	100.601
AL20-37_BSE-image1_pyroxene9	Grain 3	53.83	0.102	1.181	0.127	18.454	0.525	25.906	0.388	0.001	0.013	100.527
AL20-37_BSE-image2_amf?_1	Grain 1	55.22	0.071	2.696	0.075	6.76	0.144	20.598	12.054	0.19	0.019	97.827
AL20-37_BSE-image2_amf?_2	Grain 1	55.455	0.112	2.289	0.093	6.437	0.131	20.775	12.102	0.148	0.025	97.567
AL20-37_BSE-image2_amf?_3	Grain 1	56.027	0.109	1.953	0.12	6.5	0.147	20.833	11.973	0.119	0.006	97.787
AL20-37_BSE-image2_amf?_4	Grain 2	52.412	0.071	5.606	0.164	7.986	0.14	18.931	11.921	0.461	0.026	97.718
AL20-37_BSE-image2_amf?_5	Grain 2	52.197	0.165	5.971	0.104	7.848	0.127	18.643	12.104	0.447	0.028	97.634
AL20-37_BSE-image2_amf?_6	Grain 2	52.692	0.138	5.314	0.143	7.753	0.18	19.107	11.927	0.391	0.019	97.664
AL20-37_BSE-image2_amf?_7	Grain 2	54.041	0.051	3.959	0.112	7.099	0.146	19.908	12.14	0.223	0.022	97.701
AL20-37_BSE-image2_amf?_8	Grain 2	53.654	0.033	4.456	0.109	7.674	0.234	19.645	11.949	0.347	0.018	98.119
AL20-37_BSE-image2_cpx_1	Grain 1	49.084	0.355	1.608	0.892	14.44	0.223	15.335	20.893	0.046	0.009	102.885
AL20-37_BSE-image2_cpx_10	Grain 4	53.355	0.142	1.568	0.12	5.186	0.235	16.126	23.266	0.079	0.014	100.091
AL20-37_BSE-image2_cpx_11	Grain 4	46.511	0.528	1.851	1.32	19.475	0.208	14.575	19.472	0.04	0.013	103.993
AL20-37_BSE-image2_cpx_2	Grain 1	53.572	0.088	1.631	0.122	5.297	0.219	16.304	22.924	0.075	0.027	100.259
AL20-37_BSE-image2_cpx_3	Grain 2	53.679	0.095	1.216	0.146	5.335	0.202	16.297	23.653	0.061	0.013	100.697
AL20-37_BSE-image2_cpx_4	Grain 2	53.386	0.102	1.334	0.199	5.368	0.168	16.195	23.519	0.055	-0.001	100.325
AL20-37_BSE-image2_cpx_5	Grain 2	53.946	0.066	0.871	0.106	5.19	0.186	16.5	23.516	0.045	0.01	100.436
AL20-37_BSE-image2_cpx_6	Grain 3	54.09	0.093	0.92	0.088	5.16	0.223	16.491	23.839	0.037	0.023	100.964
AL20-37_BSE-image2_cpx_7	Grain 3	53.565	0.176	1.209	0.177	5.249	0.2	16.236	23.473	0.076	0.009	100.37
AL20-37_BSE-image2_cpx_8	Grain 3	54.078	0.016	0.688	0.101	4.878	0.21	16.616	23.748	0.053	0.014	100.402
AL20-37_BSE-image2_cpx_9	Grain 4	53.453	0.131	1.444	0.083	5.585	0.212	16.21	22.952	0.052	0.022	100.144
AL20-37_BSE-image2_pyroxene_1	Grain 1	54.102	0.002	0.985	0.095	18.758	0.536	25.895	0.372	-0.012	0.001	100.734
AL20-37_BSE-image2_pyroxene_10	Grain 3	53.884	0.043	1.116	0.12	18.524	0.533	26.04	0.344	-0.002	0.023	100.625
AL20-37_BSE-image2_pyroxene_2	Grain 1	53.975	0.052	1.167	0.064	17.883	0.494	25.899	0.876	0.015	0.016	100.441
AL20-37_BSE-image2_pyroxene_3	Grain 1	54.021	0.024	1.356	0.107	18.451	0.499	26.177	0.363	0.001	0.007	101.006
AL20-37_BSE-image2_pyroxene_4	Grain 1	53.877	0.048	1.39	0.125	18.372	0.466	26.205	0.324	-0.02	0.019	100.806
AL20-37_BSE-image2_pyroxene_5	Grain 1	53.819	0.022	1.246	0.121	18.375	0.492	25.639	0.512	-0.002	0.018	100.242
AL20-37_BSE-image2_pyroxene_6	Grain 2	53.966	0.017	1.168	0.076	18.379	0.537	26.114	0.344	0.009	0.014	100.624
AL20-37_BSE-image2_pyroxene_7	Grain 2	53.713	0.015	1.138	0.125	18.321	0.535	26.103	0.35	-0.01	0.005	100.295
AL20-37_BSE-image2_pyroxene_8	Grain 2	53.949	0.069	1.097	0.074	18.494	0.555	26.183	0.297	-0.002	0.019	100.735
AL20-37_BSE-image2_pyroxene_9	Grain 3	53.408	0.123	1.124	0.169	19.324	0.49	25.549	1.019	0	0.017	101.223
Standards: Element Oxides (wt. %)
Point	Comment	SiO2(Mass%)	TiO2(Mass%)	Al2O3(Mass%)	Cr2O3(Mass%)	FeO(Mass%)	MnO(Mass%)	MgO(Mass%)	CaO(Mass%)	Na2O(Mass%)	K2O(Mass%)	Total(Mass%)
1	Cr_augite_1	50.273	0.464	7.823	0.87	4.617	0.108	17.814	17.133	0.841	0.017	99.96
2	Cr_augite_2	50.736	0.427	7.751	0.8	4.48	0.137	17.774	17.116	0.834	0.027	100.082
3	Cr_augite_3	50.797	0.501	7.76	0.911	4.571	0.119	17.861	17.021	0.841	0.011	100.393
4	Chromite_1	0.058	0.09	9.917	59.884	12.936	0.208	15.045	0.004	0.001	0.021	98.164
5	Chromite_2	0.051	0.107	10.035	59.408	12.87	0.236	15.007	0	-0.013	0.026	97.727
6	Chromite_3	0.032	0.13	10.041	59.727	13.151	0.25	15.054	-0.01	-0.013	0.02	98.382
7	Manganite_1	0.081	-0.017	0.087	0.009	0.142	80.309	-0.006	0.015	-0.03	0.023	80.613
8	Manganite_2	0.067	-0.024	0.256	0.005	0.12	80.859	0.014	0.006	-0.019	0.023	81.307
9	Manganite_3	0.049	-0.003	0.007	-0.02	0.215	81.087	0.004	0.013	-0.005	0.015	81.362
10	Kak_anorthoclase_1	66.718	-0.018	20.065	0.014	0.123	-0.003	-0.002	0.578	7.319	2.554	97.348
11	Kak_anorthoclase_2	66.674	0.002	20.166	-0.004	0.109	-0.001	-0.007	0.571	7.007	2.538	97.055
12	Kak_anorthoclase_3	66.778	0.027	20.107	0.035	0.145	-0.002	-0.004	0.552	7.416	2.542	97.596
13	Ilmenite_1	-0.006	45.54	0.03	-0.023	45.758	4.855	0.334	0.005	-0.012	0.016	96.497
14	Ilmenite_2	-0.013	45.673	0.032	0.001	46.173	4.907	0.328	0.009	-0.036	0.015	97.089
15	Ilmenite_3	0.01	46.008	0.025	0.024	45.614	4.93	0.309	0.006	-0.025	0.014	96.915
16	Phlogopite_1	42.648	-0.005	12.544	0.014	0.007	-0.016	28.641	0.018	-0.005	11.174	95.02
17	Phlogopite_2	42.683	0	12.626	-0.001	0.027	0.01	28.775	0.009	0.001	11.131	95.261
18	Phlogopite_3	42.693	0.007	12.64	0.009	0.023	0.003	28.723	0.006	-0.003	11.231	95.332
19	Pyrope_1	41.907	0.347	24.314	0.084	9.982	0.317	19.441	5.128	0.013	0.01	101.543
20	Pyrope_2	41.854	0.451	24.464	0.116	10.236	0.294	19.589	5.107	0.013	0.007	102.131
21	Pyrope_3	41.793	0.466	24.503	0.064	9.92	0.311	19.51	5.118	0.023	0.015	101.723
1	Cr_augite_1	50.685	0.58	7.782	0.904	4.595	0.116	17.783	16.907	0.816	-0.002	100.166
2	Cr_augite_2	50.742	0.499	7.747	0.864	4.606	0.145	17.797	16.81	0.817	0.014	100.041
3	Cr_augite_3	50.534	0.485	7.762	0.823	4.581	0.129	17.86	16.964	0.797	0.019	99.954
4	Chromite_1	0.036	0.087	9.996	60.112	13.051	0.161	14.986	0.008	-0.022	0.023	98.438
5	Chromite_2	0.052	0.117	9.991	60.576	12.877	0.229	15.015	0.012	-0.025	-0.001	98.843
6	Chromite_3	0.051	0.098	10.025	59.81	13.022	0.213	15.097	0.001	-0.015	0.025	98.327
7	Manganite_1	0.062	-0.033	0.128	-0.037	0.165	79.655	0.006	0.002	-0.023	0.015	79.94
8	Manganite_2	0.091	0	0.243	-0.008	0.174	79.356	0.016	-0.003	0.008	0.012	79.889
9	Manganite_3	0.076	0.023	0.008	-0.026	0.224	79.794	-0.001	0.005	-0.017	0.005	80.091
10	Kak_anorthoclase_1	66.953	-0.025	20.155	0	0.118	-0.021	-0.008	0.554	7.047	2.547	97.32
11	Kak_anorthoclase_2	66.584	-0.005	20.187	0.015	0.143	0.021	-0.007	0.552	6.88	2.53	96.9
12	Kak_anorthoclase_3	66.634	-0.007	20.187	-0.03	0.159	-0.006	-0.008	0.572	7.097	2.533	97.131
13	Ilmenite_1	0.009	45.944	0.024	0.039	45.282	4.699	0.333	-0.004	-0.016	0.009	96.319
14	Ilmenite_2	0.035	46.235	0.018	0.006	45.656	4.758	0.304	0.019	-0.026	0.016	97.021
15	Ilmenite_3	0.013	44.677	0.025	0.041	47.433	4.421	0.325	-0.005	-0.007	0.011	96.934
16	Phlogopite_1	42.156	0.025	12.381	-0.016	0.034	0.011	28.652	0.007	-0.006	10.969	94.213
17	Phlogopite_2	42.315	0.035	12.487	-0.001	0.011	-0.026	28.633	0.012	-0.001	11.132	94.597
18	Phlogopite_3	42.388	0.044	12.566	0.006	0.005	0.026	28.622	0.002	0.013	11.148	94.82
19	Pyrope_1	41.936	0.445	24.386	0.103	10.107	0.291	19.518	5.055	-0.003	0.012	101.85
20	Pyrope_2	42.059	0.414	24.411	0.103	10.083	0.296	19.44	5.148	0.017	0.008	101.979
21	Pyrope_3	41.961	0.39	24.347	0.083	9.952	0.367	19.478	5.115	0.011	0.014	101.718
1	Cr_augite_1	50.672	0.391	7.693	0.854	4.431	0.13	17.861	16.84	0.804	0.011	99.687
2	Cr_augite_2	50.695	0.416	7.612	0.822	4.429	0.134	17.746	16.727	0.845	0.006	99.432
3	Cr_augite_3	50.648	0.338	7.714	0.862	4.335	0.155	17.818	16.743	0.833	0.019	99.465
4	Chromite_1	0.039	0.075	9.905	59.34	12.284	0.203	14.946	0.011	-0.021	0.019	96.801
5	Chromite_2	0.035	0.081	10.014	59.579	12.255	0.21	14.933	0.013	-0.012	0.002	97.11
6	Chromite_3	0.06	0.119	9.898	59.713	12.518	0.237	14.834	-0.008	-0.019	0.011	97.363
7	Manganite_1	0.077	-0.031	0.099	-0.002	0.143	79.999	-0.002	0.01	-0.024	0.019	80.288
8	Manganite_2	0.112	-0.014	0.192	-0.004	0.169	79.263	0.01	0.01	-0.017	0.013	79.734
9	Manganite_3	0.054	-0.009	0.024	-0.001	0.205	79.43	0.005	0.008	0.015	0.01	79.741
10	Kak_anorthoclase_1	66.846	-0.018	19.877	0.001	0.116	-0.034	-0.008	0.599	6.047	2.522	95.948
11	Kak_anorthoclase_2	66.69	0.011	19.778	0.007	0.098	-0.003	0	0.578	7.017	2.492	96.668
12	Kak_anorthoclase_3	66.825	0.009	19.847	-0.006	0.147	0.021	-0.01	0.563	7.195	2.512	97.103
13	Ilmenite_1	-0.002	40.295	0.02	0.007	43.668	4.639	0.324	0.004	-0.015	0.014	88.954
14	Ilmenite_2	-0.011	39.978	0.018	0.011	44.208	4.692	0.31	0	-0.004	0.016	89.218
15	Ilmenite_3	0.029	40.549	0.029	0.015	44.029	4.771	0.316	0.002	-0.019	0.022	89.743
16	Phlogopite_1	41.686	11.135	12.291	-0.003	-0.016	-0.019	29.318	0.021	0.006	10.834	105.253
17	Phlogopite_2	41.887	-0.009	12.175	-0.016	0.055	0.005	28.329	0.004	0.015	10.919	93.364
18	Phlogopite_3	42.174	-0.007	12.308	-0.01	0.01	-0.022	28.589	-0.004	-0.006	11.025	94.057
19	Pyrope_1	41.774	0.368	24.179	0.091	9.685	0.322	19.432	5.086	0.016	0.014	100.967
20	Pyrope_2	41.887	0.339	24.159	0.1	9.741	0.279	19.469	5.079	0.03	0.003	101.086
21	Pyrope_3	41.848	0.282	24.151	0.073	9.571	0.314	19.584	5.017	0.015	0.007	100.862
1	Cr_augite_1	50.642	0.377	7.795	0.855	4.487	0.152	17.714	16.839	0.825	0.022	99.708
2	Cr_augite_2	50.661	0.391	7.696	0.904	4.468	0.113	17.868	16.788	0.796	0.008	99.693
3	Cr_augite_3	50.856	0.368	7.739	0.9	4.548	0.131	17.774	16.83	0.828	0.016	99.99
4	Chromite_1	0.04	0.083	9.938	59.852	12.716	0.214	14.829	0.001	-0.012	0.022	97.683
5	Chromite_2	0.063	0.104	9.87	59.657	12.353	0.245	14.92	-0.001	-0.01	0.011	97.212
6	Chromite_3	0.015	0.117	9.936	60.197	12.342	0.197	14.886	0.007	-0.025	0.021	97.693
7	Manganite_1	0.057	-0.009	0.398	-0.009	0.061	79.243	0.001	0.01	-0.036	0.023	79.739
8	Manganite_2	0.064	0.012	0.49	-0.046	0.109	80.1	-0.011	0.005	-0.024	0.014	80.713
9	Manganite_3	0.039	-0.023	-0.004	-0.011	0.186	80.08	0.009	-0.002	0.002	0.017	80.293
10	Kak_anorthoclase_1	66.733	0.037	19.955	-0.011	0.124	-0.006	-0.004	0.533	6.984	2.494	96.839
11	Kak_anorthoclase_2	66.587	-0.021	19.962	0.006	0.111	0.012	-0.011	0.546	6.532	2.486	96.21
12	Kak_anorthoclase_3	66.922	0.039	19.998	0	0.1	0.006	-0.001	0.562	7.323	2.507	97.456
13	Ilmenite_1	0.023	41.534	0.018	0	44.307	4.747	0.299	-0.003	-0.029	0.004	90.9
14	Ilmenite_2	0.018	40.749	0.007	0.023	44.508	4.81	0.303	0.005	-0.018	0.016	90.421
15	Ilmenite_3	0.019	41.787	0.021	0.025	44.334	4.72	0.295	0.013	-0.007	0.003	91.21
16	Phlogopite_1	42.807	-0.007	12.607	0.009	0.014	0.022	28.836	0.018	0.003	11.048	95.357
17	Phlogopite_2	42.969	-0.002	12.68	0.013	0.023	0.003	28.896	0.011	0.001	11.04	95.634
18	Phlogopite_3	42.805	0.009	12.706	0.019	0.022	0.003	28.767	0.004	0.008	11.097	95.44
19	Pyrope_1	41.754	0.304	24.121	0.09	9.731	0.326	19.386	5.058	0.025	0.015	100.81
20	Pyrope_2	41.841	0.315	24.21	0.078	9.955	0.337	19.522	5.058	0.025	0.017	101.358
21	Pyrope_3	41.734	0.378	24.258	0.081	9.718	0.311	19.446	5.105	0.015	0.013	101.059
1	Cr_augite_1	50.594	0.34	7.579	0.977	4.292	0.101	17.864	16.867	0.823	0.007	99.444
2	Cr_augite_2	50.719	0.354	7.614	0.906	4.406	0.102	17.81	16.892	0.809	0.011	99.623
3	Cr_augite_3	50.496	0.382	7.616	0.896	4.381	0.139	17.904	16.717	0.803	0.021	99.355
4	Chromite_1	0.027	0.074	9.821	59.157	12.497	0.201	14.761	-0.012	-0.034	0.007	96.499
5	Chromite_2	0.05	0.113	9.824	59.244	12.181	0.227	14.81	0.019	-0.006	0.007	96.469
6	Chromite_3	0.026	0.094	9.751	59.301	12.267	0.186	14.775	-0.008	-0.017	0.02	96.395
7	Manganite_1	0.08	-0.005	0.101	-0.018	0.157	79.812	-0.004	0.011	-0.024	0.006	80.116
8	Manganite_2	0.071	-0.026	0.12	-0.011	0.072	79.848	-0.005	0.003	-0.015	0.016	80.073
9	Manganite_3	0.042	-0.021	0.007	-0.009	0.213	80.671	0.016	-0.005	-0.018	0.02	80.916
10	Kak_anorthoclase_1	67.007	0	20.112	0.009	0.128	-0.012	-0.002	0.561	4.667	2.501	94.971
11	Kak_anorthoclase_2	68.063	-0.011	20.455	-0.024	0.144	-0.001	0.002	0.578	3.73	2.202	95.138
12	Kak_anorthoclase_3	67.568	0.03	20.269	0.011	0.132	0.014	-0.01	0.601	4.611	2.564	95.79
13	Ilmenite_1	0.018	38.76	0.028	0.015	43.562	4.784	0.318	0.007	-0.029	0.007	87.47
14	Ilmenite_2	0.019	38.978	0.023	0.035	43.371	4.714	0.338	-0.001	-0.021	0.023	87.479
15	Ilmenite_3	0.025	39.252	0.03	0.014	43.818	4.881	0.318	-0.006	-0.019	0.005	88.318
16	Phlogopite_1	42.39	-0.014	12.415	0.031	0.02	0.01	28.388	0.013	0.004	11.024	94.281
17	Phlogopite_2	42.531	0.028	12.366	0.017	0.023	0.014	28.762	0.005	0.009	11.089	94.844
18	Phlogopite_3	42.605	-0.005	12.357	-0.011	0.04	-0.025	28.612	0	0.008	10.968	94.549
19	Pyrope_1	41.848	0.376	24.017	0.111	9.595	0.311	19.517	5.066	0.023	0.008	100.872
20	Pyrope_2	41.932	0.351	24.195	0.103	9.712	0.335	19.603	5.115	0.016	0.017	101.379
21	Pyrope_3	42.034	0.371	24.192	0.081	9.702	0.274	19.691	5.045	0.016	0.011	101.417

## Sheet: Two-pyroxene thermometers
Two-Pyroxene thermometers
																																									60.0843	79.8788	101.961	71.8464	70.9375	40.3044	56.0774	61.9789	94.196
For details and references see: Putirka, K. (2008) Thermometers and Barometers for Volcanic Systems. In: Putirka, K., Tepley, F. (Eds.), Minerals, Inclusions and Volcanic Processes, Reviews in Mineralogy and Geochemistry, Mineralogical Soc. Am., v. 69, pp. 61-120.																																									SiO2	TiO2	Al2O3	FeO	MnO	MgO	CaO	Na2O	K2O
																														Barometers and Thermometers
					Enter Clinopyroxene Composition Here											Enter Orthopyroxene Composition Here																					Test for Equilibrium
																														Brey and Kohler (1990)		Putirka (2008) RiMG				Cpx-only	(KD should be 1.09±.14)				Clinopyroxene
					Clinopyroxene Composition - in Weight Percent											Orthopyroxene Composition - in Weight Percent											For Calculation inputs - iterative			T(BKN)		Eqn 36	Eqn 37	Eqn 38	Eqn 39	Eqn. 32 modified	Observed				Mole Proportions
					SiO2	TiO2	Al2O3	FeOt	MnO	MgO	CaO	Na2O	K2O	Cr2O3		SiO2	TiO2	Al2O3	FeOt	MnO	MgO	CaO	Na2O	K2O	Cr2O3		T(C )	P(kbar)		T(C )		T(C )	T(C )	P(kbar)	P(kbar)	T(C )	KD(Fe-Mg)		Kf		SiO2	TiO2	Al2O3	FeO	MnO	MgO	CaO	Na2O	K2O
AL20-37_BSE-image1_cpx_1	Grain 1	AL20-37_BSE-image1_pyroxene1	Grain 1		53.446	0.104	1.585	5.431	0.224	16.042	23.197	0.06	0.011	0.153		53.886	0.12	1.168	18.619	0.544	25.781	0.548	-0.007	0.003	0.106		786.775	9.23472		786.775		869.049	839.149	9.23472	0.920291	921.199	0.468775		0.2411		0.889517	0.00130197	0.0155452	0.0755918	0.00315771	0.398021	0.41366	0.000968071	0.000116778
		AL20-37_BSE-image1_pyroxene2	Grain 1		53.446	0.104	1.585	5.431	0.224	16.042	23.197	0.06	0.011	0.153		53.842	0.033	1.3	18.116	0.414	26.123	0.323	0.006	0.003	0.091		796.368	12.8347		796.368		892.408	853.365	12.8347	-1.85178	953.633	0.488182		0.142326		0.889517	0.00130197	0.0155452	0.0755918	0.00315771	0.398021	0.41366	0.000968071	0.000116778
		AL20-37_BSE-image1_pyroxene3	Grain 1		53.446	0.104	1.585	5.431	0.224	16.042	23.197	0.06	0.011	0.153		53.887	0.039	1.385	18.325	0.441	26.097	0.305	0.001	0.014	0.112		796.259	13.5603		796.259		891.675	854.149	13.5603	-2.37436	960.171	0.482134		0.134056		0.889517	0.00130197	0.0155452	0.0755918	0.00315771	0.398021	0.41366	0.000968071	0.000116778
		AL20-37_BSE-image1_pyroxene4	Grain 1		53.446	0.104	1.585	5.431	0.224	16.042	23.197	0.06	0.011	0.153		53.889	-0.009	1.231	18.41	0.523	26.075	0.44	0.008	0.012	0.08		792.897	11.5499		792.897		880.087	844.816	11.5499	0.781218	942.058	0.479504		0.193534		0.889517	0.00130197	0.0155452	0.0755918	0.00315771	0.398021	0.41366	0.000968071	0.000116778
		AL20-37_BSE-image1_pyroxene5	Grain 1		53.446	0.104	1.585	5.431	0.224	16.042	23.197	0.06	0.011	0.153		53.878	0.044	1.194	18.428	0.482	25.968	0.382	-0.01	0.017	0.075		791.776	11.5346		791.776		879.873	846.27	11.5346	-0.490086	941.92	0.477069		0.168297		0.889517	0.00130197	0.0155452	0.0755918	0.00315771	0.398021	0.41366	0.000968071	0.000116778
		AL20-37_BSE-image1_pyroxene6	Grain 2		53.446	0.104	1.585	5.431	0.224	16.042	23.197	0.06	0.011	0.153		54.175	0.002	0.824	18.611	0.574	25.974	0.294	-0.001	0.014	0.017		795.34	14.2756		795.34		881.946	849.571	14.2756	-2.57005	966.615	0.472488		0.129558		0.889517	0.00130197	0.0155452	0.0755918	0.00315771	0.398021	0.41366	0.000968071	0.000116778
		AL20-37_BSE-image1_pyroxene7	Grain 2		53.446	0.104	1.585	5.431	0.224	16.042	23.197	0.06	0.011	0.153		53.942	0.015	1.156	18.757	0.513	26.111	0.336	-0.012	0.014	0.064		793.384	13.2442		793.384		882.199	849.705	13.2442	-1.15747	957.323	0.471283		0.147614		0.889517	0.00130197	0.0155452	0.0755918	0.00315771	0.398021	0.41366	0.000968071	0.000116778
		AL20-37_BSE-image1_pyroxene8	Grain 2		53.446	0.104	1.585	5.431	0.224	16.042	23.197	0.06	0.011	0.153		54.028	0.022	0.924	18.734	0.578	25.943	0.302	-0.011	0.021	0.06		794.019	14.0103		794.019		879.131	849.058	14.0103	-2.35685	964.225	0.468825		0.133061		0.889517	0.00130197	0.0155452	0.0755918	0.00315771	0.398021	0.41366	0.000968071	0.000116778
		AL20-37_BSE-image1_pyroxene9	Grain 3		53.446	0.104	1.585	5.431	0.224	16.042	23.197	0.06	0.011	0.153		53.83	0.102	1.181	18.454	0.525	25.906	0.388	0.001	0.013	0.127		791.17	11.4123		791.17		877.289	845.616	11.4123	-0.812566	940.818	0.47526		0.17093		0.889517	0.00130197	0.0155452	0.0755918	0.00315771	0.398021	0.41366	0.000968071	0.000116778
		AL20-37_BSE-image1_pyroxene10	Grain 3		53.446	0.104	1.585	5.431	0.224	16.042	23.197	0.06	0.011	0.153		53.87	0.026	1.168	18.576	0.536	25.852	0.331	-0.005	0.007	0.112		793.363	13.2658		793.363		881.387	848.952	13.2658	-1.53121	957.518	0.471154		0.145921		0.889517	0.00130197	0.0155452	0.0755918	0.00315771	0.398021	0.41366	0.000968071	0.000116778
		AL20-37_BSE-image1_pyroxene11	Grain 4		53.446	0.104	1.585	5.431	0.224	16.042	23.197	0.06	0.011	0.153		54.006	0.065	1.136	18.302	0.499	26.09	0.334	-0.008	0.011	0.106		794.039	12.2536		794.039		881.053	848.186	12.2536	-1.82943	948.398	0.482611		0.146919		0.889517	0.00130197	0.0155452	0.0755918	0.00315771	0.398021	0.41366	0.000968071	0.000116778
		AL20-37_BSE-image1_pyroxene12	Grain 4		53.446	0.104	1.585	5.431	0.224	16.042	23.197	0.06	0.011	0.153		53.953	0.033	1.183	18.501	0.499	25.87	0.38	-0.008	0.015	0.077		791.414	11.7935		791.414		879.553	846.021	11.7935	-0.483897	944.252	0.473394		0.167371		0.889517	0.00130197	0.0155452	0.0755918	0.00315771	0.398021	0.41366	0.000968071	0.000116778
AL20-37_BSE-image1_cpx_2	Grain 1	AL20-37_BSE-image1_pyroxene1	Grain 1		53.566	0.116	1.338	5.136	0.204	16.105	23.522	0.046	0.009	0.135		53.886	0.12	1.168	18.619	0.544	25.781	0.548	-0.007	0.003	0.106		749.815	8.51065		749.815		847.136	808.712	8.51065	0.393448	878.298	0.441578		0.28255		0.891514	0.0014522	0.0131227	0.0714858	0.00287577	0.399584	0.419456	0.000742188	9.55455e-05
		AL20-37_BSE-image1_pyroxene2	Grain 1		53.566	0.116	1.338	5.136	0.204	16.105	23.522	0.046	0.009	0.135		53.842	0.033	1.3	18.116	0.414	26.123	0.323	0.006	0.003	0.091		757.789	11.6081		757.789		867.422	820.417	11.6081	-1.7505	905.351	0.459859		0.166795		0.891514	0.0014522	0.0131227	0.0714858	0.00287577	0.399584	0.419456	0.000742188	9.55455e-05
		AL20-37_BSE-image1_pyroxene3	Grain 1		53.566	0.116	1.338	5.136	0.204	16.105	23.522	0.046	0.009	0.135		53.887	0.039	1.385	18.325	0.441	26.097	0.305	0.001	0.014	0.112		757.556	12.2581		757.556		866.446	820.917	12.2581	-2.17316	911.028	0.454162		0.157103		0.891514	0.0014522	0.0131227	0.0714858	0.00287577	0.399584	0.419456	0.000742188	9.55455e-05
		AL20-37_BSE-image1_pyroxene4	Grain 1		53.566	0.116	1.338	5.136	0.204	16.105	23.522	0.046	0.009	0.135		53.889	-0.009	1.231	18.41	0.523	26.075	0.44	0.008	0.012	0.08		755.193	10.6478		755.193		856.967	813.456	10.6478	0.469098	896.964	0.451684		0.226806		0.891514	0.0014522	0.0131227	0.0714858	0.00287577	0.399584	0.419456	0.000742188	9.55455e-05
		AL20-37_BSE-image1_pyroxene5	Grain 1		53.566	0.116	1.338	5.136	0.204	16.105	23.522	0.046	0.009	0.135		53.878	0.044	1.194	18.428	0.482	25.968	0.382	-0.01	0.017	0.075		753.863	10.4973		753.863		856.268	814.409	10.4973	-0.622942	895.65	0.449391		0.19723		0.891514	0.0014522	0.0131227	0.0714858	0.00287577	0.399584	0.419456	0.000742188	9.55455e-05
		AL20-37_BSE-image1_pyroxene6	Grain 2		53.566	0.116	1.338	5.136	0.204	16.105	23.522	0.046	0.009	0.135		54.175	0.002	0.824	18.611	0.574	25.974	0.294	-0.001	0.014	0.017		756.629	12.9281		756.629		857.091	816.554	12.9281	-2.30614	916.879	0.445075		0.151832		0.891514	0.0014522	0.0131227	0.0714858	0.00287577	0.399584	0.419456	0.000742188	9.55455e-05
		AL20-37_BSE-image1_pyroxene7	Grain 2		53.566	0.116	1.338	5.136	0.204	16.105	23.522	0.046	0.009	0.135		53.942	0.015	1.156	18.757	0.513	26.111	0.336	-0.012	0.014	0.064		755.108	12.0616		755.108		857.936	817.162	12.0616	-1.10385	909.311	0.44394		0.172992		0.891514	0.0014522	0.0131227	0.0714858	0.00287577	0.399584	0.419456	0.000742188	9.55455e-05
		AL20-37_BSE-image1_pyroxene8	Grain 2		53.566	0.116	1.338	5.136	0.204	16.105	23.522	0.046	0.009	0.135		54.028	0.022	0.924	18.734	0.578	25.943	0.302	-0.011	0.021	0.06		755.461	12.6983		755.461		854.561	816.185	12.6983	-2.13552	914.872	0.441625		0.155937		0.891514	0.0014522	0.0131227	0.0714858	0.00287577	0.399584	0.419456	0.000742188	9.55455e-05
		AL20-37_BSE-image1_pyroxene9	Grain 3		53.566	0.116	1.338	5.136	0.204	16.105	23.522	0.046	0.009	0.135		53.83	0.102	1.181	18.454	0.525	25.906	0.388	0.001	0.013	0.127		753.327	10.391		753.327		853.879	813.85	10.391	-0.964507	894.721	0.447687		0.200316		0.891514	0.0014522	0.0131227	0.0714858	0.00287577	0.399584	0.419456	0.000742188	9.55455e-05
		AL20-37_BSE-image1_pyroxene10	Grain 3		53.566	0.116	1.338	5.136	0.204	16.105	23.522	0.046	0.009	0.135		53.87	0.026	1.168	18.576	0.536	25.852	0.331	-0.005	0.007	0.112		755.062	12.0695		755.062		857.117	816.426	12.0695	-1.4596	909.38	0.443819		0.171007		0.891514	0.0014522	0.0131227	0.0714858	0.00287577	0.399584	0.419456	0.000742188	9.55455e-05
		AL20-37_BSE-image1_pyroxene11	Grain 4		53.566	0.116	1.338	5.136	0.204	16.105	23.522	0.046	0.009	0.135		54.006	0.065	1.136	18.302	0.499	26.09	0.334	-0.008	0.011	0.106		755.681	11.0654		755.681		856.831	815.741	11.0654	-1.77171	900.611	0.454611		0.172177		0.891514	0.0014522	0.0131227	0.0714858	0.00287577	0.399584	0.419456	0.000742188	9.55455e-05
		AL20-37_BSE-image1_pyroxene12	Grain 4		53.566	0.116	1.338	5.136	0.204	16.105	23.522	0.046	0.009	0.135		53.953	0.033	1.183	18.501	0.499	25.87	0.38	-0.008	0.015	0.077		753.52	10.7504		753.52		855.944	814.161	10.7504	-0.607874	897.86	0.445929		0.196145		0.891514	0.0014522	0.0131227	0.0714858	0.00287577	0.399584	0.419456	0.000742188	9.55455e-05
AL20-37_BSE-image1_cpx_3	Grain 2	AL20-37_BSE-image1_pyroxene1	Grain 1		53.933	0.041	0.829	5.234	0.202	16.422	23.679	0.051	0.006	0.103		53.886	0.12	1.168	18.619	0.544	25.781	0.548	-0.007	0.003	0.106		735.918	8.29535		735.918		848.527	807.335	8.29535	0.0936464	864.96	0.441317		0.297773		0.897622	0.000513278	0.00813056	0.0728499	0.00284758	0.407449	0.422256	0.000822861	6.3697e-05
		AL20-37_BSE-image1_pyroxene2	Grain 1		53.933	0.041	0.829	5.234	0.202	16.422	23.679	0.051	0.006	0.103		53.842	0.033	1.3	18.116	0.414	26.123	0.323	0.006	0.003	0.091		743.434	11.2434		743.434		868.316	818.559	11.2434	-1.86247	890.451	0.459588		0.175781		0.897622	0.000513278	0.00813056	0.0728499	0.00284758	0.407449	0.422256	0.000822861	6.3697e-05
		AL20-37_BSE-image1_pyroxene3	Grain 1		53.933	0.041	0.829	5.234	0.202	16.422	23.679	0.051	0.006	0.103		53.887	0.039	1.385	18.325	0.441	26.097	0.305	0.001	0.014	0.112		743.178	11.8709		743.178		867.254	818.99	11.8709	-2.25476	895.877	0.453894		0.165567		0.897622	0.000513278	0.00813056	0.0728499	0.00284758	0.407449	0.422256	0.000822861	6.3697e-05
		AL20-37_BSE-image1_pyroxene4	Grain 1		53.933	0.041	0.829	5.234	0.202	16.422	23.679	0.051	0.006	0.103		53.889	-0.009	1.231	18.41	0.523	26.075	0.44	0.008	0.012	0.08		741.085	10.3796		741.085		858.196	811.909	10.3796	0.233666	882.982	0.451417		0.239026		0.897622	0.000513278	0.00813056	0.0728499	0.00284758	0.407449	0.422256	0.000822861	6.3697e-05
		AL20-37_BSE-image1_pyroxene5	Grain 1		53.933	0.041	0.829	5.234	0.202	16.422	23.679	0.051	0.006	0.103		53.878	0.044	1.194	18.428	0.482	25.968	0.382	-0.01	0.017	0.075		739.701	10.1889		739.701		857.346	812.741	10.1889	-0.804707	881.333	0.449126		0.207856		0.897622	0.000513278	0.00813056	0.0728499	0.00284758	0.407449	0.422256	0.000822861	6.3697e-05
		AL20-37_BSE-image1_pyroxene6	Grain 2		53.933	0.041	0.829	5.234	0.202	16.422	23.679	0.051	0.006	0.103		54.175	0.002	0.824	18.611	0.574	25.974	0.294	-0.001	0.014	0.017		742.266	12.5274		742.266		857.832	814.608	12.5274	-2.3683	901.554	0.444812		0.160012		0.897622	0.000513278	0.00813056	0.0728499	0.00284758	0.407449	0.422256	0.000822861	6.3697e-05
		AL20-37_BSE-image1_pyroxene7	Grain 2		53.933	0.041	0.829	5.234	0.202	16.422	23.679	0.051	0.006	0.103		53.942	0.015	1.156	18.757	0.513	26.111	0.336	-0.012	0.014	0.064		740.863	11.7099		740.863		858.859	815.356	11.7099	-1.22909	894.485	0.443678		0.182312		0.897622	0.000513278	0.00813056	0.0728499	0.00284758	0.407449	0.422256	0.000822861	6.3697e-05
		AL20-37_BSE-image1_pyroxene8	Grain 2		53.933	0.041	0.829	5.234	0.202	16.422	23.679	0.051	0.006	0.103		54.028	0.022	0.924	18.734	0.578	25.943	0.302	-0.011	0.021	0.06		741.144	12.3082		741.144		855.336	814.271	12.3082	-2.21029	899.658	0.441364		0.164339		0.897622	0.000513278	0.00813056	0.0728499	0.00284758	0.407449	0.422256	0.000822861	6.3697e-05
		AL20-37_BSE-image1_pyroxene9	Grain 3		53.933	0.041	0.829	5.234	0.202	16.422	23.679	0.051	0.006	0.103		53.83	0.102	1.181	18.454	0.525	25.906	0.388	0.001	0.013	0.127		739.187	10.0873		739.187		854.968	812.198	10.0873	-1.15192	880.454	0.447422		0.211108		0.897622	0.000513278	0.00813056	0.0728499	0.00284758	0.407449	0.422256	0.000822861	6.3697e-05
		AL20-37_BSE-image1_pyroxene10	Grain 3		53.933	0.041	0.829	5.234	0.202	16.422	23.679	0.051	0.006	0.103		53.87	0.026	1.168	18.576	0.536	25.852	0.331	-0.005	0.007	0.112		740.81	11.7137		740.81		858.024	814.611	11.7137	-1.57945	894.518	0.443557		0.18022		0.897622	0.000513278	0.00813056	0.0728499	0.00284758	0.407449	0.422256	0.000822861	6.3697e-05
		AL20-37_BSE-image1_pyroxene11	Grain 4		53.933	0.041	0.829	5.234	0.202	16.422	23.679	0.051	0.006	0.103		54.006	0.065	1.136	18.302	0.499	26.09	0.334	-0.008	0.011	0.106		741.392	10.7121		741.392		857.746	813.936	10.7121	-1.8966	885.857	0.454342		0.181453		0.897622	0.000513278	0.00813056	0.0728499	0.00284758	0.407449	0.422256	0.000822861	6.3697e-05
		AL20-37_BSE-image1_pyroxene12	Grain 4		53.933	0.041	0.829	5.234	0.202	16.422	23.679	0.051	0.006	0.103		53.953	0.033	1.183	18.501	0.499	25.87	0.38	-0.008	0.015	0.077		739.37	10.4403		739.37		857.015	812.489	10.4403	-0.786718	883.507	0.445665		0.206713		0.897622	0.000513278	0.00813056	0.0728499	0.00284758	0.407449	0.422256	0.000822861	6.3697e-05
AL20-37_BSE-image1_cpx_4	Grain 2	AL20-37_BSE-image1_pyroxene1	Grain 1		53.638	0.113	1.478	5.573	0.187	16.109	23.322	0.069	0.011	0.139		53.886	0.12	1.168	18.619	0.544	25.781	0.548	-0.007	0.003	0.106		779.616	9.1232		779.616		868.488	836.639	9.1232	0.687781	912.608	0.479031		0.246674		0.892712	0.00141464	0.0144957	0.0775683	0.00263612	0.399683	0.415889	0.00111328	0.000116778
		AL20-37_BSE-image1_pyroxene2	Grain 1		53.638	0.113	1.478	5.573	0.187	16.109	23.322	0.069	0.011	0.139		53.842	0.033	1.3	18.116	0.414	26.123	0.323	0.006	0.003	0.091		789.007	12.6458		789.007		891.508	850.524	12.6458	-1.98542	944.143	0.498863		0.145616		0.892712	0.00141464	0.0144957	0.0775683	0.00263612	0.399683	0.415889	0.00111328	0.000116778
		AL20-37_BSE-image1_pyroxene3	Grain 1		53.638	0.113	1.478	5.573	0.187	16.109	23.322	0.069	0.011	0.139		53.887	0.039	1.385	18.325	0.441	26.097	0.305	0.001	0.014	0.112		788.896	13.3598		788.896		890.731	851.265	13.3598	-2.49185	950.536	0.492682		0.137155		0.892712	0.00141464	0.0144957	0.0775683	0.00263612	0.399683	0.415889	0.00111328	0.000116778
		AL20-37_BSE-image1_pyroxene4	Grain 1		53.638	0.113	1.478	5.573	0.187	16.109	23.322	0.069	0.011	0.139		53.889	-0.009	1.231	18.41	0.523	26.075	0.44	0.008	0.012	0.08		785.658	11.4109		785.658		879.406	842.187	11.4109	0.583317	933.089	0.489994		0.198008		0.892712	0.00141464	0.0144957	0.0775683	0.00263612	0.399683	0.415889	0.00111328	0.000116778
		AL20-37_BSE-image1_pyroxene5	Grain 1		53.638	0.113	1.478	5.573	0.187	16.109	23.322	0.069	0.011	0.139		53.878	0.044	1.194	18.428	0.482	25.968	0.382	-0.01	0.017	0.075		784.504	11.3749		784.504		879.111	843.566	11.3749	-0.660427	932.766	0.487507		0.172187		0.892712	0.00141464	0.0144957	0.0775683	0.00263612	0.399683	0.415889	0.00111328	0.000116778
		AL20-37_BSE-image1_pyroxene6	Grain 2		53.638	0.113	1.478	5.573	0.187	16.109	23.322	0.069	0.011	0.139		54.175	0.002	0.824	18.611	0.574	25.974	0.294	-0.001	0.014	0.017		787.996	14.068		787.996		880.995	846.696	14.068	-2.67698	956.876	0.482825		0.132553		0.892712	0.00141464	0.0144957	0.0775683	0.00263612	0.399683	0.415889	0.00111328	0.000116778
		AL20-37_BSE-image1_pyroxene7	Grain 2		53.638	0.113	1.478	5.573	0.187	16.109	23.322	0.069	0.011	0.139		53.942	0.015	1.156	18.757	0.513	26.111	0.336	-0.012	0.014	0.064		786.09	13.062		786.09		881.346	846.909	13.062	-1.29752	947.87	0.481593		0.151026		0.892712	0.00141464	0.0144957	0.0775683	0.00263612	0.399683	0.415889	0.00111328	0.000116778
		AL20-37_BSE-image1_pyroxene8	Grain 2		53.638	0.113	1.478	5.573	0.187	16.109	23.322	0.069	0.011	0.139		54.028	0.022	0.924	18.734	0.578	25.943	0.302	-0.011	0.021	0.06		786.696	13.8082		786.696		878.207	846.204	13.8082	-2.47042	954.55	0.479082		0.136137		0.892712	0.00141464	0.0144957	0.0775683	0.00263612	0.399683	0.415889	0.00111328	0.000116778
		AL20-37_BSE-image1_pyroxene9	Grain 3		53.638	0.113	1.478	5.573	0.187	16.109	23.322	0.069	0.011	0.139		53.83	0.102	1.181	18.454	0.525	25.906	0.388	0.001	0.013	0.127		783.908	11.255		783.908		876.541	842.925	11.255	-0.985882	931.693	0.485658		0.174881		0.892712	0.00141464	0.0144957	0.0775683	0.00263612	0.399683	0.415889	0.00111328	0.000116778
		AL20-37_BSE-image1_pyroxene10	Grain 3		53.638	0.113	1.478	5.573	0.187	16.109	23.322	0.069	0.011	0.139		53.87	0.026	1.168	18.576	0.536	25.852	0.331	-0.005	0.007	0.112		786.066	13.0816		786.066		880.528	846.154	13.0816	-1.66848	948.045	0.481462		0.149294		0.892712	0.00141464	0.0144957	0.0775683	0.00263612	0.399683	0.415889	0.00111328	0.000116778
		AL20-37_BSE-image1_pyroxene11	Grain 4		53.638	0.113	1.478	5.573	0.187	16.109	23.322	0.069	0.011	0.139		54.006	0.065	1.136	18.302	0.499	26.09	0.334	-0.008	0.011	0.106		786.705	12.0706		786.705		880.199	845.397	12.0706	-1.97009	938.995	0.493169		0.150315		0.892712	0.00141464	0.0144957	0.0775683	0.00263612	0.399683	0.415889	0.00111328	0.000116778
		AL20-37_BSE-image1_pyroxene12	Grain 4		53.638	0.113	1.478	5.573	0.187	16.109	23.322	0.069	0.011	0.139		53.953	0.033	1.183	18.501	0.499	25.87	0.38	-0.008	0.015	0.077		784.152	11.6328		784.152		878.788	843.316	11.6328	-0.65253	935.075	0.483751		0.17124		0.892712	0.00141464	0.0144957	0.0775683	0.00263612	0.399683	0.415889	0.00111328	0.000116778
AL20-37_BSE-image1_cpx_5	Grain 3	AL20-37_BSE-image1_pyroxene1	Grain 1		53.353	0.152	1.577	5.651	0.22	16.089	23.504	0.041	0.003	0.154		53.886	0.12	1.168	18.619	0.544	25.781	0.548	-0.007	0.003	0.106		762.016	8.69646		762.016		867.058	831.063	8.69646	0.0274466	891.41	0.48634		0.270611		0.887969	0.00190288	0.0154667	0.0786539	0.00310132	0.399187	0.419135	0.000661515	3.18485e-05
		AL20-37_BSE-image1_pyroxene2	Grain 1		53.353	0.152	1.577	5.651	0.22	16.089	23.504	0.041	0.003	0.154		53.842	0.033	1.3	18.116	0.414	26.123	0.323	0.006	0.003	0.091		770.614	11.9229		770.614		888.83	843.832	11.9229	-2.2683	919.869	0.506474		0.159747		0.887969	0.00190288	0.0154667	0.0786539	0.00310132	0.399187	0.419135	0.000661515	3.18485e-05
		AL20-37_BSE-image1_pyroxene3	Grain 1		53.353	0.152	1.577	5.651	0.22	16.089	23.504	0.041	0.003	0.154		53.887	0.039	1.385	18.325	0.441	26.097	0.305	0.001	0.014	0.112		770.446	12.5923		770.446		887.882	844.422	12.5923	-2.71508	925.774	0.500199		0.150465		0.887969	0.00190288	0.0154667	0.0786539	0.00310132	0.399187	0.419135	0.000661515	3.18485e-05
		AL20-37_BSE-image1_pyroxene4	Grain 1		53.353	0.152	1.577	5.651	0.22	16.089	23.504	0.041	0.003	0.154		53.889	-0.009	1.231	18.41	0.523	26.075	0.44	0.008	0.012	0.08		767.727	10.8793		767.727		877.536	836.214	10.8793	0.0544185	910.664	0.49747		0.217223		0.887969	0.00190288	0.0154667	0.0786539	0.00310132	0.399187	0.419135	0.000661515	3.18485e-05
		AL20-37_BSE-image1_pyroxene5	Grain 1		53.353	0.152	1.577	5.651	0.22	16.089	23.504	0.041	0.003	0.154		53.878	0.044	1.194	18.428	0.482	25.968	0.382	-0.01	0.017	0.075		766.437	10.7635		766.437		876.936	837.328	10.7635	-1.08423	909.643	0.494945		0.188897		0.887969	0.00190288	0.0154667	0.0786539	0.00310132	0.399187	0.419135	0.000661515	3.18485e-05
		AL20-37_BSE-image1_pyroxene6	Grain 2		53.353	0.152	1.577	5.651	0.22	16.089	23.504	0.041	0.003	0.154		54.175	0.002	0.824	18.611	0.574	25.974	0.294	-0.001	0.014	0.017		769.553	13.2739		769.553		878.105	839.843	13.2739	-2.86273	931.786	0.490191		0.145416		0.887969	0.00190288	0.0154667	0.0786539	0.00310132	0.399187	0.419135	0.000661515	3.18485e-05
		AL20-37_BSE-image1_pyroxene7	Grain 2		53.353	0.152	1.577	5.651	0.22	16.089	23.504	0.041	0.003	0.154		53.942	0.015	1.156	18.757	0.513	26.111	0.336	-0.012	0.014	0.064		767.866	12.365		767.866		878.829	840.354	12.365	-1.60891	923.769	0.488941		0.165682		0.887969	0.00190288	0.0154667	0.0786539	0.00310132	0.399187	0.419135	0.000661515	3.18485e-05
		AL20-37_BSE-image1_pyroxene8	Grain 2		53.353	0.152	1.577	5.651	0.22	16.089	23.504	0.041	0.003	0.154		54.028	0.022	0.924	18.734	0.578	25.943	0.302	-0.011	0.021	0.06		768.327	13.035		768.327		875.416	839.424	13.035	-2.68199	929.679	0.486391		0.149348		0.887969	0.00190288	0.0154667	0.0786539	0.00310132	0.399187	0.419135	0.000661515	3.18485e-05
		AL20-37_BSE-image1_pyroxene9	Grain 3		53.353	0.152	1.577	5.651	0.22	16.089	23.504	0.041	0.003	0.154		53.83	0.102	1.181	18.454	0.525	25.906	0.388	0.001	0.013	0.127		765.875	10.6531		765.875		874.414	836.725	10.6531	-1.42127	908.668	0.493067		0.191852		0.887969	0.00190288	0.0154667	0.0786539	0.00310132	0.399187	0.419135	0.000661515	3.18485e-05
		AL20-37_BSE-image1_pyroxene10	Grain 3		53.353	0.152	1.577	5.651	0.22	16.089	23.504	0.041	0.003	0.154		53.87	0.026	1.168	18.576	0.536	25.852	0.331	-0.005	0.007	0.112		767.827	12.3765		767.827		877.984	839.586	12.3765	-1.96927	923.87	0.488808		0.163781		0.887969	0.00190288	0.0154667	0.0786539	0.00310132	0.399187	0.419135	0.000661515	3.18485e-05
		AL20-37_BSE-image1_pyroxene11	Grain 4		53.353	0.152	1.577	5.651	0.22	16.089	23.504	0.041	0.003	0.154		54.006	0.065	1.136	18.302	0.499	26.09	0.334	-0.008	0.011	0.106		768.41	11.3703		768.41		877.676	838.856	11.3703	-2.28011	914.995	0.500693		0.164902		0.887969	0.00190288	0.0154667	0.0786539	0.00310132	0.399187	0.419135	0.000661515	3.18485e-05
		AL20-37_BSE-image1_pyroxene12	Grain 4		53.353	0.152	1.577	5.651	0.22	16.089	23.504	0.041	0.003	0.154		53.953	0.033	1.183	18.501	0.499	25.87	0.38	-0.008	0.015	0.077		766.101	11.0181		766.101		876.601	837.071	11.0181	-1.0709	911.888	0.491131		0.187857		0.887969	0.00190288	0.0154667	0.0786539	0.00310132	0.399187	0.419135	0.000661515	3.18485e-05
AL20-37_BSE-image1_cpx_6	Grain 3	AL20-37_BSE-image1_pyroxene1	Grain 1		53.58	0.093	1.42	5.295	0.195	16.136	23.475	0.064	0.016	0.143		53.886	0.12	1.168	18.619	0.544	25.781	0.548	-0.007	0.003	0.106		757.498	8.70516		757.498		856.266	820.307	8.70516	0.312784	885.703	0.454374		0.270077		0.891747	0.00116426	0.0139269	0.0736989	0.0027489	0.400353	0.418618	0.00103261	0.000169859
		AL20-37_BSE-image1_pyroxene2	Grain 1		53.58	0.093	1.42	5.295	0.195	16.136	23.475	0.064	0.016	0.143		53.842	0.033	1.3	18.116	0.414	26.123	0.323	0.006	0.003	0.091		765.889	11.9376		765.889		877.516	832.764	11.9376	-2.00067	914.074	0.473185		0.159432		0.891747	0.00116426	0.0139269	0.0736989	0.0027489	0.400353	0.418618	0.00103261	0.000169859
		AL20-37_BSE-image1_pyroxene3	Grain 1		53.58	0.093	1.42	5.295	0.195	16.136	23.475	0.064	0.016	0.143		53.887	0.039	1.385	18.325	0.441	26.097	0.305	0.001	0.014	0.112		765.697	12.6079		765.697		876.595	833.342	12.6079	-2.44985	919.957	0.467322		0.150168		0.891747	0.00116426	0.0139269	0.0736989	0.0027489	0.400353	0.418618	0.00103261	0.000169859
		AL20-37_BSE-image1_pyroxene4	Grain 1		53.58	0.093	1.42	5.295	0.195	16.136	23.475	0.064	0.016	0.143		53.889	-0.009	1.231	18.41	0.523	26.075	0.44	0.008	0.012	0.08		763.07	10.8901		763.07		866.491	825.332	10.8901	0.330489	904.88	0.464773		0.216794		0.891747	0.00116426	0.0139269	0.0736989	0.0027489	0.400353	0.418618	0.00103261	0.000169859
		AL20-37_BSE-image1_pyroxene5	Grain 1		53.58	0.093	1.42	5.295	0.195	16.136	23.475	0.064	0.016	0.143		53.878	0.044	1.194	18.428	0.482	25.968	0.382	-0.01	0.017	0.075		761.794	10.776		761.794		865.912	826.422	10.776	-0.809748	903.878	0.462413		0.188524		0.891747	0.00116426	0.0139269	0.0736989	0.0027489	0.400353	0.418618	0.00103261	0.000169859
		AL20-37_BSE-image1_pyroxene6	Grain 2		53.58	0.093	1.42	5.295	0.195	16.136	23.475	0.064	0.016	0.143		54.175	0.002	0.824	18.611	0.574	25.974	0.294	-0.001	0.014	0.017		764.783	13.2901		764.783		867.067	828.883	13.2901	-2.59915	925.944	0.457972		0.145129		0.891747	0.00116426	0.0139269	0.0736989	0.0027489	0.400353	0.418618	0.00103261	0.000169859
		AL20-37_BSE-image1_pyroxene7	Grain 2		53.58	0.093	1.42	5.295	0.195	16.136	23.475	0.064	0.016	0.143		53.942	0.015	1.156	18.757	0.513	26.111	0.336	-0.012	0.014	0.064		763.147	12.3792		763.147		867.765	829.375	12.3792	-1.34032	917.95	0.456804		0.165355		0.891747	0.00116426	0.0139269	0.0736989	0.0027489	0.400353	0.418618	0.00103261	0.000169859
		AL20-37_BSE-image1_pyroxene8	Grain 2		53.58	0.093	1.42	5.295	0.195	16.136	23.475	0.064	0.016	0.143		54.028	0.022	0.924	18.734	0.578	25.943	0.302	-0.011	0.021	0.06		763.578	13.0508		763.578		864.442	828.473	13.0508	-2.41692	923.844	0.454422		0.149054		0.891747	0.00116426	0.0139269	0.0736989	0.0027489	0.400353	0.418618	0.00103261	0.000169859
		AL20-37_BSE-image1_pyroxene9	Grain 3		53.58	0.093	1.42	5.295	0.195	16.136	23.475	0.064	0.016	0.143		53.83	0.102	1.181	18.454	0.525	25.906	0.388	0.001	0.013	0.127		761.242	10.6653		761.242		863.453	825.834	10.6653	-1.14611	902.907	0.460659		0.191473		0.891747	0.00116426	0.0139269	0.0736989	0.0027489	0.400353	0.418618	0.00103261	0.000169859
		AL20-37_BSE-image1_pyroxene10	Grain 3		53.58	0.093	1.42	5.295	0.195	16.136	23.475	0.064	0.016	0.143		53.87	0.026	1.168	18.576	0.536	25.852	0.331	-0.005	0.007	0.112		763.107	12.3909		763.107		866.942	828.628	12.3909	-1.70091	918.052	0.45668		0.163458		0.891747	0.00116426	0.0139269	0.0736989	0.0027489	0.400353	0.418618	0.00103261	0.000169859
		AL20-37_BSE-image1_pyroxene11	Grain 4		53.58	0.093	1.42	5.295	0.195	16.136	23.475	0.064	0.016	0.143		54.006	0.065	1.136	18.302	0.499	26.09	0.334	-0.008	0.011	0.106		763.726	11.3846		763.726		866.641	827.916	11.3846	-2.01	909.22	0.467784		0.164576		0.891747	0.00116426	0.0139269	0.0736989	0.0027489	0.400353	0.418618	0.00103261	0.000169859
		AL20-37_BSE-image1_pyroxene12	Grain 4		53.58	0.093	1.42	5.295	0.195	16.136	23.475	0.064	0.016	0.143		53.953	0.033	1.183	18.501	0.499	25.87	0.38	-0.008	0.015	0.077		761.451	11.0306		761.451		865.586	826.172	11.0306	-0.796852	906.113	0.458851		0.187487		0.891747	0.00116426	0.0139269	0.0736989	0.0027489	0.400353	0.418618	0.00103261	0.000169859
AL20-37_BSE-image1_cpx_7	Grain 3	AL20-37_BSE-image1_pyroxene1	Grain 1		53.718	0.075	1.361	4.941	0.186	16.291	23.6	0.052	0.01	0.149		53.886	0.12	1.168	18.619	0.544	25.781	0.548	-0.007	0.003	0.106		747.321	8.49373		747.321		848.67	811.982	8.49373	0.21547	875.647	0.419963		0.28369		0.894044	0.000938922	0.0133482	0.0687717	0.00262203	0.404199	0.420847	0.000838995	0.000106162
		AL20-37_BSE-image1_pyroxene2	Grain 1		53.718	0.075	1.361	4.941	0.186	16.291	23.6	0.052	0.01	0.149		53.842	0.033	1.3	18.116	0.414	26.123	0.323	0.006	0.003	0.091		755.139	11.5794		755.139		868.985	823.748	11.5794	-1.91916	902.539	0.437349		0.167467		0.894044	0.000938922	0.0133482	0.0687717	0.00262203	0.404199	0.420847	0.000838995	0.000106162
		AL20-37_BSE-image1_pyroxene3	Grain 1		53.718	0.075	1.361	4.941	0.186	16.291	23.6	0.052	0.01	0.149		53.887	0.039	1.385	18.325	0.441	26.097	0.305	0.001	0.014	0.112		754.883	12.2277		754.883		867.999	824.247	12.2277	-2.34034	908.188	0.43193		0.157737		0.894044	0.000938922	0.0133482	0.0687717	0.00262203	0.404199	0.420847	0.000838995	0.000106162
		AL20-37_BSE-image1_pyroxene4	Grain 1		53.718	0.075	1.361	4.941	0.186	16.291	23.6	0.052	0.01	0.149		53.889	-0.009	1.231	18.41	0.523	26.075	0.44	0.008	0.012	0.08		752.6	10.6268		752.6		858.521	816.753	10.6268	0.292473	894.236	0.429574		0.227721		0.894044	0.000938922	0.0133482	0.0687717	0.00262203	0.404199	0.420847	0.000838995	0.000106162
		AL20-37_BSE-image1_pyroxene5	Grain 1		53.718	0.075	1.361	4.941	0.186	16.291	23.6	0.052	0.01	0.149		53.878	0.044	1.194	18.428	0.482	25.968	0.382	-0.01	0.017	0.075		751.273	10.4731		751.273		857.808	817.704	10.4731	-0.795029	892.897	0.427393		0.198026		0.894044	0.000938922	0.0133482	0.0687717	0.00262203	0.404199	0.420847	0.000838995	0.000106162
		AL20-37_BSE-image1_pyroxene6	Grain 2		53.718	0.075	1.361	4.941	0.186	16.291	23.6	0.052	0.01	0.149		54.175	0.002	0.824	18.611	0.574	25.974	0.294	-0.001	0.014	0.017		753.939	12.8966		753.939		858.607	819.845	12.8966	-2.47263	914.018	0.423288		0.152444		0.894044	0.000938922	0.0133482	0.0687717	0.00262203	0.404199	0.420847	0.000838995	0.000106162
		AL20-37_BSE-image1_pyroxene7	Grain 2		53.718	0.075	1.361	4.941	0.186	16.291	23.6	0.052	0.01	0.149		53.942	0.015	1.156	18.757	0.513	26.111	0.336	-0.012	0.014	0.064		752.459	12.0339		752.459		859.469	820.469	12.0339	-1.27387	906.499	0.422209		0.17369		0.894044	0.000938922	0.0133482	0.0687717	0.00262203	0.404199	0.420847	0.000838995	0.000106162
		AL20-37_BSE-image1_pyroxene8	Grain 2		53.718	0.075	1.361	4.941	0.186	16.291	23.6	0.052	0.01	0.149		54.028	0.022	0.924	18.734	0.578	25.943	0.302	-0.011	0.021	0.06		752.785	12.6677		752.785		856.071	819.475	12.6677	-2.30253	912.022	0.420007		0.156566		0.894044	0.000938922	0.0133482	0.0687717	0.00262203	0.404199	0.420847	0.000838995	0.000106162
		AL20-37_BSE-image1_pyroxene9	Grain 3		53.718	0.075	1.361	4.941	0.186	16.291	23.6	0.052	0.01	0.149		53.83	0.102	1.181	18.454	0.525	25.906	0.388	0.001	0.013	0.127		750.744	10.3671		750.744		855.411	817.142	10.3671	-1.13682	891.974	0.425772		0.201124		0.894044	0.000938922	0.0133482	0.0687717	0.00262203	0.404199	0.420847	0.000838995	0.000106162
		AL20-37_BSE-image1_pyroxene10	Grain 3		53.718	0.075	1.361	4.941	0.186	16.291	23.6	0.052	0.01	0.149		53.87	0.026	1.168	18.576	0.536	25.852	0.331	-0.005	0.007	0.112		752.412	12.0415		752.412		858.647	819.726	12.0415	-1.62921	906.566	0.422094		0.171697		0.894044	0.000938922	0.0133482	0.0687717	0.00262203	0.404199	0.420847	0.000838995	0.000106162
		AL20-37_BSE-image1_pyroxene11	Grain 4		53.718	0.075	1.361	4.941	0.186	16.291	23.6	0.052	0.01	0.149		54.006	0.065	1.136	18.302	0.499	26.09	0.334	-0.008	0.011	0.106		753.058	11.0376		753.058		858.36	819.036	11.0376	-1.94037	897.817	0.432357		0.172871		0.894044	0.000938922	0.0133482	0.0687717	0.00262203	0.404199	0.420847	0.000838995	0.000106162
		AL20-37_BSE-image1_pyroxene12	Grain 4		53.718	0.075	1.361	4.941	0.186	16.291	23.6	0.052	0.01	0.149		53.953	0.033	1.183	18.501	0.499	25.87	0.38	-0.008	0.015	0.077		750.924	10.7261		750.924		857.482	817.454	10.7261	-0.780049	895.102	0.4241		0.196936		0.894044	0.000938922	0.0133482	0.0687717	0.00262203	0.404199	0.420847	0.000838995	0.000106162
AL20-37_BSE-image1_cpx_8	Grain 3	AL20-37_BSE-image1_pyroxene1	Grain 1		53.112	0.057	1.596	5.538	0.166	15.935	23.299	0.081	0.017	0.192		53.886	0.12	1.168	18.619	0.544	25.781	0.548	-0.007	0.003	0.106		759.987	8.80455		759.987		865.17	828.929	8.80455	-0.0320225	886.68	0.481221		0.264119		0.883958	0.000713581	0.015653	0.0770811	0.00234009	0.395366	0.415479	0.0013069	0.000180475
		AL20-37_BSE-image1_pyroxene2	Grain 1		53.112	0.057	1.596	5.538	0.166	15.935	23.299	0.081	0.017	0.192		53.842	0.033	1.3	18.116	0.414	26.123	0.323	0.006	0.003	0.091		768.676	12.106		768.676		887.141	841.867	12.106	-2.42829	915.659	0.501143		0.155915		0.883958	0.000713581	0.015653	0.0770811	0.00234009	0.395366	0.415479	0.0013069	0.000180475
		AL20-37_BSE-image1_pyroxene3	Grain 1		53.112	0.057	1.596	5.538	0.166	15.935	23.299	0.081	0.017	0.192		53.887	0.039	1.385	18.325	0.441	26.097	0.305	0.001	0.014	0.112		768.528	12.7867		768.528		886.24	842.489	12.7867	-2.88995	921.635	0.494934		0.146856		0.883958	0.000713581	0.015653	0.0770811	0.00234009	0.395366	0.415479	0.0013069	0.000180475
		AL20-37_BSE-image1_pyroxene4	Grain 1		53.112	0.057	1.596	5.538	0.166	15.935	23.299	0.081	0.017	0.192		53.889	-0.009	1.231	18.41	0.523	26.075	0.44	0.008	0.012	0.08		765.715	11.014		765.715		875.703	834.135	11.014	-0.0413696	906.074	0.492234		0.212012		0.883958	0.000713581	0.015653	0.0770811	0.00234009	0.395366	0.415479	0.0013069	0.000180475
		AL20-37_BSE-image1_pyroxene5	Grain 1		53.112	0.057	1.596	5.538	0.166	15.935	23.299	0.081	0.017	0.192		53.878	0.044	1.194	18.428	0.482	25.968	0.382	-0.01	0.017	0.075		764.468	10.9184		764.468		875.183	835.305	10.9184	-1.20624	905.235	0.489735		0.184365		0.883958	0.000713581	0.015653	0.0770811	0.00234009	0.395366	0.415479	0.0013069	0.000180475
		AL20-37_BSE-image1_pyroxene6	Grain 2		53.112	0.057	1.596	5.538	0.166	15.935	23.299	0.081	0.017	0.192		54.175	0.002	0.824	18.611	0.574	25.974	0.294	-0.001	0.014	0.017		767.648	13.475		767.648		876.526	837.951	13.475	-3.04642	927.677	0.485032		0.141928		0.883958	0.000713581	0.015653	0.0770811	0.00234009	0.395366	0.415479	0.0013069	0.000180475
		AL20-37_BSE-image1_pyroxene7	Grain 2		53.112	0.057	1.596	5.538	0.166	15.935	23.299	0.081	0.017	0.192		53.942	0.015	1.156	18.757	0.513	26.111	0.336	-0.012	0.014	0.064		765.925	12.5416		765.925		877.152	838.384	12.5416	-1.75991	919.483	0.483795		0.161708		0.883958	0.000713581	0.015653	0.0770811	0.00234009	0.395366	0.415479	0.0013069	0.000180475
		AL20-37_BSE-image1_pyroxene8	Grain 2		53.112	0.057	1.596	5.538	0.166	15.935	23.299	0.081	0.017	0.192		54.028	0.022	0.924	18.734	0.578	25.943	0.302	-0.011	0.021	0.06		766.418	13.2308		766.418		873.825	837.518	13.2308	-2.85848	925.533	0.481272		0.145766		0.883958	0.000713581	0.015653	0.0770811	0.00234009	0.395366	0.415479	0.0013069	0.000180475
		AL20-37_BSE-image1_pyroxene9	Grain 3		53.112	0.057	1.596	5.538	0.166	15.935	23.299	0.081	0.017	0.192		53.83	0.102	1.181	18.454	0.525	25.906	0.388	0.001	0.013	0.127		763.904	10.8055		763.904		872.662	834.698	10.8055	-1.54003	904.244	0.487877		0.187249		0.883958	0.000713581	0.015653	0.0770811	0.00234009	0.395366	0.415479	0.0013069	0.000180475
		AL20-37_BSE-image1_pyroxene10	Grain 3		53.112	0.057	1.596	5.538	0.166	15.935	23.299	0.081	0.017	0.192		53.87	0.026	1.168	18.576	0.536	25.852	0.331	-0.005	0.007	0.112		765.889	12.5551		765.889		876.318	837.626	12.5551	-2.12294	919.602	0.483663		0.159853		0.883958	0.000713581	0.015653	0.0770811	0.00234009	0.395366	0.415479	0.0013069	0.000180475
		AL20-37_BSE-image1_pyroxene11	Grain 4		53.112	0.057	1.596	5.538	0.166	15.935	23.299	0.081	0.017	0.192		54.006	0.065	1.136	18.302	0.499	26.09	0.334	-0.008	0.011	0.106		766.472	11.5477		766.472		876.006	836.895	11.5477	-2.4321	910.759	0.495423		0.160946		0.883958	0.000713581	0.015653	0.0770811	0.00234009	0.395366	0.415479	0.0013069	0.000180475
		AL20-37_BSE-image1_pyroxene12	Grain 4		53.112	0.057	1.596	5.538	0.166	15.935	23.299	0.081	0.017	0.192		53.953	0.033	1.183	18.501	0.499	25.87	0.38	-0.008	0.015	0.077		764.134	11.1738		764.134		874.853	835.052	11.1738	-1.19402	907.477	0.485962		0.183351		0.883958	0.000713581	0.015653	0.0770811	0.00234009	0.395366	0.415479	0.0013069	0.000180475
AL20-37_BSE-image1_cpx_9	Grain 3	AL20-37_BSE-image1_pyroxene1	Grain 1		51.708	0.275	1.827	8.31	0.207	15.653	21.612	0.075	0.009	0.358		53.886	0.12	1.168	18.619	0.544	25.781	0.548	-0.007	0.003	0.106		901.487	11.9988		901.487		975.986	951.38	11.9988	0.258987	1055.47	0.735101		0.15455		0.860591	0.00344272	0.0179186	0.115663	0.00291806	0.38837	0.385396	0.00121009	9.55455e-05
		AL20-37_BSE-image1_pyroxene2	Grain 1		51.708	0.275	1.827	8.31	0.207	15.653	21.612	0.075	0.009	0.358		53.842	0.033	1.3	18.116	0.414	26.123	0.323	0.006	0.003	0.091		919.322	17.517		919.322		1015.34	977.697	17.517	-4.81808	1109.64	0.765533		0.0912341		0.860591	0.00344272	0.0179186	0.115663	0.00291806	0.38837	0.385396	0.00121009	9.55455e-05
		AL20-37_BSE-image1_pyroxene3	Grain 1		51.708	0.275	1.827	8.31	0.207	15.653	21.612	0.075	0.009	0.358		53.887	0.039	1.385	18.325	0.441	26.097	0.305	0.001	0.014	0.112		920.109	18.5315		920.109		1015.88	979.945	18.5315	-5.70327	1119.6	0.756049		0.0859331		0.860591	0.00344272	0.0179186	0.115663	0.00291806	0.38837	0.385396	0.00121009	9.55455e-05
		AL20-37_BSE-image1_pyroxene4	Grain 1		51.708	0.275	1.827	8.31	0.207	15.653	21.612	0.075	0.009	0.358		53.889	-0.009	1.231	18.41	0.523	26.075	0.44	0.008	0.012	0.08		911.373	14.9932		911.373		993.269	961.426	14.9932	-0.658382	1084.86	0.751924		0.124059		0.860591	0.00344272	0.0179186	0.115663	0.00291806	0.38837	0.385396	0.00121009	9.55455e-05
		AL20-37_BSE-image1_pyroxene5	Grain 1		51.708	0.275	1.827	8.31	0.207	15.653	21.612	0.075	0.009	0.358		53.878	0.044	1.194	18.428	0.482	25.968	0.382	-0.01	0.017	0.075		911.467	15.4944		911.467		995.549	965.422	15.4944	-2.5953	1089.78	0.748107		0.107882		0.860591	0.00344272	0.0179186	0.115663	0.00291806	0.38837	0.385396	0.00121009	9.55455e-05
		AL20-37_BSE-image1_pyroxene6	Grain 2		51.708	0.275	1.827	8.31	0.207	15.653	21.612	0.075	0.009	0.358		54.175	0.002	0.824	18.611	0.574	25.974	0.294	-0.001	0.014	0.017		919.578	19.4193		919.578		1004.14	974.644	19.4193	-6.12229	1128.32	0.740922		0.0830495		0.860591	0.00344272	0.0179186	0.115663	0.00291806	0.38837	0.385396	0.00121009	9.55455e-05
		AL20-37_BSE-image1_pyroxene7	Grain 2		51.708	0.275	1.827	8.31	0.207	15.653	21.612	0.075	0.009	0.358		53.942	0.015	1.156	18.757	0.513	26.111	0.336	-0.012	0.014	0.064		915.281	17.7587		915.281		1001.3	972.196	17.7587	-3.93736	1112.02	0.739033		0.0946238		0.860591	0.00344272	0.0179186	0.115663	0.00291806	0.38837	0.385396	0.00121009	9.55455e-05
		AL20-37_BSE-image1_pyroxene8	Grain 2		51.708	0.275	1.827	8.31	0.207	15.653	21.612	0.075	0.009	0.358		54.028	0.022	0.924	18.734	0.578	25.943	0.302	-0.011	0.021	0.06		917.544	19.0186		917.544		999.812	973.404	19.0186	-5.75221	1124.39	0.735179		0.0852953		0.860591	0.00344272	0.0179186	0.115663	0.00291806	0.38837	0.385396	0.00121009	9.55455e-05
		AL20-37_BSE-image1_pyroxene9	Grain 3		51.708	0.275	1.827	8.31	0.207	15.653	21.612	0.075	0.009	0.358		53.83	0.102	1.181	18.454	0.525	25.906	0.388	0.001	0.013	0.127		910.533	15.311		910.533		991.941	964.322	15.311	-2.84747	1087.98	0.745269		0.10957		0.860591	0.00344272	0.0179186	0.115663	0.00291806	0.38837	0.385396	0.00121009	9.55455e-05
		AL20-37_BSE-image1_pyroxene10	Grain 3		51.708	0.275	1.827	8.31	0.207	15.653	21.612	0.075	0.009	0.358		53.87	0.026	1.168	18.576	0.536	25.852	0.331	-0.005	0.007	0.112		915.403	17.8328		915.403		1000.52	971.429	17.8328	-4.37775	1112.74	0.738831		0.0935382		0.860591	0.00344272	0.0179186	0.115663	0.00291806	0.38837	0.385396	0.00121009	9.55455e-05
		AL20-37_BSE-image1_pyroxene11	Grain 4		51.708	0.275	1.827	8.31	0.207	15.653	21.612	0.075	0.009	0.358		54.006	0.065	1.136	18.302	0.499	26.09	0.334	-0.008	0.011	0.106		915.965	16.7896		915.965		999.932	970.297	16.7896	-4.63782	1102.5	0.756796		0.094178		0.860591	0.00344272	0.0179186	0.115663	0.00291806	0.38837	0.385396	0.00121009	9.55455e-05
		AL20-37_BSE-image1_pyroxene12	Grain 4		51.708	0.275	1.827	8.31	0.207	15.653	21.612	0.075	0.009	0.358		53.953	0.033	1.183	18.501	0.499	25.87	0.38	-0.008	0.015	0.077		911.133	15.7751		911.133		995.247	965.187	15.7751	-2.61841	1092.54	0.742343		0.107288		0.860591	0.00344272	0.0179186	0.115663	0.00291806	0.38837	0.385396	0.00121009	9.55455e-05
AL20-37_BSE-image2_cpx_2	Grain 1	AL20-37_BSE-image2_pyroxene_1	Grain 1		53.572	0.088	1.631	5.297	0.219	16.304	22.924	0.075	0.027	0.122		54.102	0.002	0.985	18.758	0.536	25.895	0.372	-0.012	0.001	0.095		821.894	13.4999		821.894		895.79	876.429	13.4999	-0.483237	990.086	0.448503		0.143739		0.891614	0.00110167	0.0159963	0.0737267	0.00308722	0.404522	0.408792	0.00121009	0.000286636
		AL20-37_BSE-image2_pyroxene_2	Grain 1		53.572	0.088	1.631	5.297	0.219	16.304	22.924	0.075	0.027	0.122		53.975	0.052	1.167	17.883	0.494	25.899	0.876	0.015	0.016	0.064		820.351	7.63939		820.351		891.536	864.417	7.63939	2.47367	935.98	0.47052		0.338645		0.891614	0.00110167	0.0159963	0.0737267	0.00308722	0.404522	0.408792	0.00121009	0.000286636
		AL20-37_BSE-image2_pyroxene_3	Grain 1		53.572	0.088	1.631	5.297	0.219	16.304	22.924	0.075	0.027	0.122		54.021	0.024	1.356	18.451	0.499	26.177	0.363	0.001	0.007	0.107		825.066	13.5283		825.066		901.865	877.958	13.5283	-0.709793	990.348	0.460931		0.139686		0.891614	0.00110167	0.0159963	0.0737267	0.00308722	0.404522	0.408792	0.00121009	0.000286636
		AL20-37_BSE-image2_pyroxene_4	Grain 1		53.572	0.088	1.631	5.297	0.219	16.304	22.924	0.075	0.027	0.122		53.877	0.048	1.39	18.372	0.466	26.205	0.324	-0.02	0.019	0.125		825.88	13.7982		825.88		902.294	880.188	13.7982	-1.98093	992.84	0.463408		0.124887		0.891614	0.00110167	0.0159963	0.0737267	0.00308722	0.404522	0.408792	0.00121009	0.000286636
		AL20-37_BSE-image2_pyroxene_5	Grain 1		53.572	0.088	1.631	5.297	0.219	16.304	22.924	0.075	0.027	0.122		53.819	0.022	1.246	18.375	0.492	25.639	0.512	-0.002	0.018	0.121		819.105	10.8366		819.105		893.66	870.757	10.8366	1.49857	965.498	0.453325		0.19857		0.891614	0.00110167	0.0159963	0.0737267	0.00308722	0.404522	0.408792	0.00121009	0.000286636
		AL20-37_BSE-image2_pyroxene_6	Grain 2		53.572	0.088	1.631	5.297	0.219	16.304	22.924	0.075	0.027	0.122		53.966	0.017	1.168	18.379	0.537	26.114	0.344	0.009	0.014	0.076		826.17	14.0702		826.17		901.359	877.822	14.0702	-1.21355	995.352	0.461623		0.132871		0.891614	0.00110167	0.0159963	0.0737267	0.00308722	0.404522	0.408792	0.00121009	0.000286636
		AL20-37_BSE-image2_pyroxene_7	Grain 2		53.572	0.088	1.631	5.297	0.219	16.304	22.924	0.075	0.027	0.122		53.713	0.015	1.138	18.321	0.535	26.103	0.35	-0.01	0.005	0.125		825.62	13.6061		825.62		897.006	876.913	13.6061	-1.05491	991.066	0.462889		0.135672		0.891614	0.00110167	0.0159963	0.0737267	0.00308722	0.404522	0.408792	0.00121009	0.000286636
		AL20-37_BSE-image2_pyroxene_8	Grain 2		53.572	0.088	1.631	5.297	0.219	16.304	22.924	0.075	0.027	0.122		53.949	0.069	1.097	18.494	0.555	26.183	0.297	-0.002	0.019	0.074		827.175	14.9966		827.175		900.898	880.354	14.9966	-3.07958	1003.9	0.459965		0.114667		0.891614	0.00110167	0.0159963	0.0737267	0.00308722	0.404522	0.408792	0.00121009	0.000286636
		AL20-37_BSE-image2_pyroxene_9	Grain 3		53.572	0.088	1.631	5.297	0.219	16.304	22.924	0.075	0.027	0.122		53.408	0.123	1.124	19.324	0.49	25.549	1.019	0	0.017	0.169		814.735	9.52002		814.735		895.837	873.073	9.52002	3.12401	953.342	0.429549		0.394307		0.891614	0.00110167	0.0159963	0.0737267	0.00308722	0.404522	0.408792	0.00121009	0.000286636
		AL20-37_BSE-image2_pyroxene_10	Grain 3		53.572	0.088	1.631	5.297	0.219	16.304	22.924	0.075	0.027	0.122		53.884	0.043	1.116	18.524	0.533	26.04	0.344	-0.002	0.023	0.12		824.572	13.8981		824.572		898.996	878.602	13.8981	-1.43294	993.762	0.456712		0.133002		0.891614	0.00110167	0.0159963	0.0737267	0.00308722	0.404522	0.408792	0.00121009	0.000286636
AL20-37_BSE-image2_cpx_3	Grain 2	AL20-37_BSE-image2_pyroxene_1	Grain 1		53.679	0.095	1.216	5.335	0.202	16.297	23.653	0.061	0.013	0.146		54.102	0.002	0.985	18.758	0.536	25.895	0.372	-0.012	0.001	0.095		744.559	11.2815		744.559		862.243	821.966	11.2815	-1.09173	892.09	0.451914		0.196353		0.893395	0.0011893	0.0119261	0.0742556	0.00284758	0.404348	0.421792	0.000984206	0.00013801
		AL20-37_BSE-image2_pyroxene_2	Grain 1		53.679	0.095	1.216	5.335	0.202	16.297	23.653	0.061	0.013	0.146		53.975	0.052	1.167	17.883	0.494	25.899	0.876	0.015	0.016	0.064		745.381	6.69779		745.381		863.03	815.107	6.69779	0.190531	852.412	0.474099		0.462603		0.893395	0.0011893	0.0119261	0.0742556	0.00284758	0.404348	0.421792	0.000984206	0.00013801
		AL20-37_BSE-image2_pyroxene_3	Grain 1		53.679	0.095	1.216	5.335	0.202	16.297	23.653	0.061	0.013	0.146		54.021	0.024	1.356	18.451	0.499	26.177	0.363	0.001	0.007	0.107		747.181	11.2455		747.181		867.628	823.119	11.2455	-1.25324	891.779	0.464437		0.190817		0.893395	0.0011893	0.0119261	0.0742556	0.00284758	0.404348	0.421792	0.000984206	0.00013801
		AL20-37_BSE-image2_pyroxene_4	Grain 1		53.679	0.095	1.216	5.335	0.202	16.297	23.653	0.061	0.013	0.146		53.877	0.048	1.39	18.372	0.466	26.205	0.324	-0.02	0.019	0.125		747.374	11.2449		747.374		867.008	824.27	11.2449	-2.175	891.773	0.466933		0.170601		0.893395	0.0011893	0.0119261	0.0742556	0.00284758	0.404348	0.421792	0.000984206	0.00013801
		AL20-37_BSE-image2_pyroxene_5	Grain 1		53.679	0.095	1.216	5.335	0.202	16.297	23.653	0.061	0.013	0.146		53.819	0.022	1.246	18.375	0.492	25.639	0.512	-0.002	0.018	0.121		743.079	9.23081		743.079		862.542	818.778	9.23081	0.0944764	874.338	0.456773		0.271255		0.893395	0.0011893	0.0119261	0.0742556	0.00284758	0.404348	0.421792	0.000984206	0.00013801
		AL20-37_BSE-image2_pyroxene_6	Grain 2		53.679	0.095	1.216	5.335	0.202	16.297	23.653	0.061	0.013	0.146		53.966	0.017	1.168	18.379	0.537	26.114	0.344	0.009	0.014	0.076		747.974	11.6704		747.974		866.72	822.651	11.6704	-1.60767	895.457	0.465134		0.181508		0.893395	0.0011893	0.0119261	0.0742556	0.00284758	0.404348	0.421792	0.000984206	0.00013801
		AL20-37_BSE-image2_pyroxene_7	Grain 2		53.679	0.095	1.216	5.335	0.202	16.297	23.653	0.061	0.013	0.146		53.713	0.015	1.138	18.321	0.535	26.103	0.35	-0.01	0.005	0.125		747.534	11.2558		747.534		862.878	821.999	11.2558	-1.5132	891.867	0.46641		0.185333		0.893395	0.0011893	0.0119261	0.0742556	0.00284758	0.404348	0.421792	0.000984206	0.00013801
		AL20-37_BSE-image2_pyroxene_8	Grain 2		53.679	0.095	1.216	5.335	0.202	16.297	23.653	0.061	0.013	0.146		53.949	0.069	1.097	18.494	0.555	26.183	0.297	-0.002	0.019	0.074		748.207	12.2157		748.207		864.866	823.735	12.2157	-2.97699	900.177	0.463463		0.15664		0.893395	0.0011893	0.0119261	0.0742556	0.00284758	0.404348	0.421792	0.000984206	0.00013801
		AL20-37_BSE-image2_pyroxene_9	Grain 3		53.679	0.095	1.216	5.335	0.202	16.297	23.653	0.061	0.013	0.146		53.408	0.123	1.124	19.324	0.49	25.549	1.019	0	0.017	0.169		741.156	8.71134		741.156		867.56	823.196	8.71134	0.71804	869.842	0.432816		0.538639		0.893395	0.0011893	0.0119261	0.0742556	0.00284758	0.404348	0.421792	0.000984206	0.00013801
		AL20-37_BSE-image2_pyroxene_10	Grain 3		53.679	0.095	1.216	5.335	0.202	16.297	23.653	0.061	0.013	0.146		53.884	0.043	1.116	18.524	0.533	26.04	0.344	-0.002	0.023	0.12		746.57	11.5006		746.57		864.543	823.343	11.5006	-1.82162	893.987	0.460186		0.181686		0.893395	0.0011893	0.0119261	0.0742556	0.00284758	0.404348	0.421792	0.000984206	0.00013801
AL20-37_BSE-image2_cpx_4	Grain 2	AL20-37_BSE-image2_pyroxene_1	Grain 1		53.386	0.102	1.334	5.368	0.168	16.195	23.519	0.055	-0.001	0.199		54.102	0.002	0.985	18.758	0.536	25.895	0.372	-0.012	0.001	0.095		751.907	11.4279		751.907		868.45	828.785	11.4279	-1.14756	902.819	0.457574		0.191723		0.888518	0.00127693	0.0130834	0.0747149	0.00236828	0.401817	0.419402	0.000887399	-1.06162e-05
		AL20-37_BSE-image2_pyroxene_2	Grain 1		53.386	0.102	1.334	5.368	0.168	16.195	23.519	0.055	-0.001	0.199		53.975	0.052	1.167	17.883	0.494	25.899	0.876	0.015	0.016	0.064		752.547	6.75992		752.547		868.93	821.562	6.75992	0.244062	862.083	0.480036		0.451693		0.888518	0.00127693	0.0130834	0.0747149	0.00236828	0.401817	0.419402	0.000887399	-1.06162e-05
		AL20-37_BSE-image2_pyroxene_3	Grain 1		53.386	0.102	1.334	5.368	0.168	16.195	23.519	0.055	-0.001	0.199		54.021	0.024	1.356	18.451	0.499	26.177	0.363	0.001	0.007	0.107		754.575	11.3962		754.575		873.929	829.97	11.3962	-1.31291	902.542	0.470253		0.186317		0.888518	0.00127693	0.0130834	0.0747149	0.00236828	0.401817	0.419402	0.000887399	-1.06162e-05
		AL20-37_BSE-image2_pyroxene_4	Grain 1		53.386	0.102	1.334	5.368	0.168	16.195	23.519	0.055	-0.001	0.199		53.877	0.048	1.39	18.372	0.466	26.205	0.324	-0.02	0.019	0.125		754.809	11.4134		754.809		873.367	831.194	11.4134	-2.25774	902.692	0.47278		0.166578		0.888518	0.00127693	0.0130834	0.0747149	0.00236828	0.401817	0.419402	0.000887399	-1.06162e-05
		AL20-37_BSE-image2_pyroxene_5	Grain 1		53.386	0.102	1.334	5.368	0.168	16.195	23.519	0.055	-0.001	0.199		53.819	0.022	1.246	18.375	0.492	25.639	0.512	-0.002	0.018	0.121		750.324	9.33677		750.324		868.6	825.423	9.33677	0.0904064	884.57	0.462493		0.264858		0.888518	0.00127693	0.0130834	0.0747149	0.00236828	0.401817	0.419402	0.000887399	-1.06162e-05
		AL20-37_BSE-image2_pyroxene_6	Grain 2		53.386	0.102	1.334	5.368	0.168	16.195	23.519	0.055	-0.001	0.199		53.966	0.017	1.168	18.379	0.537	26.114	0.344	0.009	0.014	0.076		755.394	11.8288		755.394		873.037	829.517	11.8288	-1.67696	906.317	0.470959		0.177227		0.888518	0.00127693	0.0130834	0.0747149	0.00236828	0.401817	0.419402	0.000887399	-1.06162e-05
		AL20-37_BSE-image2_pyroxene_7	Grain 2		53.386	0.102	1.334	5.368	0.168	16.195	23.519	0.055	-0.001	0.199		53.713	0.015	1.138	18.321	0.535	26.103	0.35	-0.01	0.005	0.125		754.943	11.4109		754.943		869.127	828.845	11.4109	-1.57843	902.67	0.472251		0.180962		0.888518	0.00127693	0.0130834	0.0747149	0.00236828	0.401817	0.419402	0.000887399	-1.06162e-05
		AL20-37_BSE-image2_pyroxene_8	Grain 2		53.386	0.102	1.334	5.368	0.168	16.195	23.519	0.055	-0.001	0.199		53.949	0.069	1.097	18.494	0.555	26.183	0.297	-0.002	0.019	0.074		755.68	12.3992		755.68		871.251	830.696	12.3992	-3.07895	911.295	0.469267		0.152945		0.888518	0.00127693	0.0130834	0.0747149	0.00236828	0.401817	0.419402	0.000887399	-1.06162e-05
		AL20-37_BSE-image2_pyroxene_9	Grain 3		53.386	0.102	1.334	5.368	0.168	16.195	23.519	0.055	-0.001	0.199		53.408	0.123	1.124	19.324	0.49	25.549	1.019	0	0.017	0.169		748.222	8.7647		748.222		873.488	829.753	8.7647	0.779315	879.578	0.438236		0.525936		0.888518	0.00127693	0.0130834	0.0747149	0.00236828	0.401817	0.419402	0.000887399	-1.06162e-05
		AL20-37_BSE-image2_pyroxene_10	Grain 3		53.386	0.102	1.334	5.368	0.168	16.195	23.519	0.055	-0.001	0.199		53.884	0.043	1.116	18.524	0.533	26.04	0.344	-0.002	0.023	0.12		753.971	11.6588		753.971		870.828	830.22	11.6588	-1.89157	904.834	0.465948		0.177401		0.888518	0.00127693	0.0130834	0.0747149	0.00236828	0.401817	0.419402	0.000887399	-1.06162e-05
AL20-37_BSE-image2_cpx_5	Grain 2	AL20-37_BSE-image2_pyroxene_1	Grain 1		53.946	0.066	0.871	5.19	0.186	16.5	23.516	0.045	0.01	0.106		54.102	0.002	0.985	18.758	0.536	25.895	0.372	-0.012	0.001	0.095		762.267	11.6471		762.267		865.897	829.403	11.6471	-0.483697	918.047	0.434223		0.185182		0.897839	0.000826252	0.00854248	0.0722374	0.00262203	0.409385	0.419349	0.000726054	0.000106162
		AL20-37_BSE-image2_pyroxene_2	Grain 1		53.946	0.066	0.871	5.19	0.186	16.5	23.516	0.045	0.01	0.106		53.975	0.052	1.167	17.883	0.494	25.899	0.876	0.015	0.016	0.064		762.864	6.85296		762.864		865.901	821.794	6.85296	1.08195	875.737	0.455539		0.436285		0.897839	0.000826252	0.00854248	0.0722374	0.00262203	0.409385	0.419349	0.000726054	0.000106162
		AL20-37_BSE-image2_pyroxene_3	Grain 1		53.946	0.066	0.871	5.19	0.186	16.5	23.516	0.045	0.01	0.106		54.021	0.024	1.356	18.451	0.499	26.177	0.363	0.001	0.007	0.107		765.005	11.6217		765.005		871.368	830.609	11.6217	-0.654778	917.822	0.446255		0.179961		0.897839	0.000826252	0.00854248	0.0722374	0.00262203	0.409385	0.419349	0.000726054	0.000106162
		AL20-37_BSE-image2_pyroxene_4	Grain 1		53.946	0.066	0.871	5.19	0.186	16.5	23.516	0.045	0.01	0.106		53.877	0.048	1.39	18.372	0.466	26.205	0.324	-0.02	0.019	0.125		765.299	11.6657		765.299		870.911	831.916	11.6657	-1.63418	918.211	0.448654		0.160895		0.897839	0.000826252	0.00854248	0.0722374	0.00262203	0.409385	0.419349	0.000726054	0.000106162
		AL20-37_BSE-image2_pyroxene_5	Grain 1		53.946	0.066	0.871	5.19	0.186	16.5	23.516	0.045	0.01	0.106		53.819	0.022	1.246	18.375	0.492	25.639	0.512	-0.002	0.018	0.121		760.633	9.49545		760.633		865.82	825.854	9.49545	0.836404	899.057	0.438891		0.255823		0.897839	0.000826252	0.00854248	0.0722374	0.00262203	0.409385	0.419349	0.000726054	0.000106162
		AL20-37_BSE-image2_pyroxene_6	Grain 2		53.946	0.066	0.871	5.19	0.186	16.5	23.516	0.045	0.01	0.106		53.966	0.017	1.168	18.379	0.537	26.114	0.344	0.009	0.014	0.076		765.841	12.0659		765.841		870.525	830.191	12.0659	-1.03421	921.742	0.446925		0.171181		0.897839	0.000826252	0.00854248	0.0722374	0.00262203	0.409385	0.419349	0.000726054	0.000106162
		AL20-37_BSE-image2_pyroxene_7	Grain 2		53.946	0.066	0.871	5.19	0.186	16.5	23.516	0.045	0.01	0.106		53.713	0.015	1.138	18.321	0.535	26.103	0.35	-0.01	0.005	0.125		765.394	11.6431		765.394		866.619	829.502	11.6431	-0.928675	918.011	0.448151		0.174789		0.897839	0.000826252	0.00854248	0.0722374	0.00262203	0.409385	0.419349	0.000726054	0.000106162
		AL20-37_BSE-image2_pyroxene_8	Grain 2		53.946	0.066	0.871	5.19	0.186	16.5	23.516	0.045	0.01	0.106		53.949	0.069	1.097	18.494	0.555	26.183	0.297	-0.002	0.019	0.074		766.179	12.674		766.179		868.892	831.485	12.674	-2.48637	927.109	0.44532		0.147728		0.897839	0.000826252	0.00854248	0.0722374	0.00262203	0.409385	0.419349	0.000726054	0.000106162
		AL20-37_BSE-image2_pyroxene_9	Grain 3		53.946	0.066	0.871	5.19	0.186	16.5	23.516	0.045	0.01	0.106		53.408	0.123	1.124	19.324	0.49	25.549	1.019	0	0.017	0.169		758.291	8.84461		758.291		870.378	829.95	8.84461	1.62437	893.314	0.415873		0.507995		0.897839	0.000826252	0.00854248	0.0722374	0.00262203	0.409385	0.419349	0.000726054	0.000106162
		AL20-37_BSE-image2_pyroxene_10	Grain 3		53.946	0.066	0.871	5.19	0.186	16.5	23.516	0.045	0.01	0.106		53.884	0.043	1.116	18.524	0.533	26.04	0.344	-0.002	0.023	0.12		764.398	11.8957		764.398		868.328	830.894	11.8957	-1.24939	920.24	0.44217		0.171349		0.897839	0.000826252	0.00854248	0.0722374	0.00262203	0.409385	0.419349	0.000726054	0.000106162
AL20-37_BSE-image2_cpx_6	Grain 3	AL20-37_BSE-image2_pyroxene_1	Grain 1		54.09	0.093	0.92	5.16	0.223	16.491	23.839	0.037	0.023	0.088		54.102	0.002	0.985	18.758	0.536	25.895	0.372	-0.012	0.001	0.095		735.423	10.9483		735.423		851.638	809.668	10.9483	-0.782348	880.926	0.431949		0.207778		0.900235	0.00116426	0.00902306	0.0718199	0.00314361	0.409161	0.425109	0.000596977	0.000244172
		AL20-37_BSE-image2_pyroxene_2	Grain 1		54.09	0.093	0.92	5.16	0.223	16.491	23.839	0.037	0.023	0.088		53.975	0.052	1.167	17.883	0.494	25.899	0.876	0.015	0.016	0.064		736.712	6.55635		736.712		853.103	803.556	6.55635	0.253392	843.178	0.453153		0.489518		0.900235	0.00116426	0.00902306	0.0718199	0.00314361	0.409161	0.425109	0.000596977	0.000244172
		AL20-37_BSE-image2_pyroxene_3	Grain 1		54.09	0.093	0.92	5.16	0.223	16.491	23.839	0.037	0.023	0.088		54.021	0.024	1.356	18.451	0.499	26.177	0.363	0.001	0.007	0.107		737.982	10.9026		737.982		856.856	810.758	10.9026	-0.933201	880.533	0.443918		0.201919		0.900235	0.00116426	0.00902306	0.0718199	0.00314361	0.409161	0.425109	0.000596977	0.000244172
		AL20-37_BSE-image2_pyroxene_4	Grain 1		54.09	0.093	0.92	5.16	0.223	16.491	23.839	0.037	0.023	0.088		53.877	0.048	1.39	18.372	0.466	26.205	0.324	-0.02	0.019	0.125		738.092	10.8614		738.092		856.101	811.756	10.8614	-1.802	880.179	0.446304		0.180527		0.900235	0.00116426	0.00902306	0.0718199	0.00314361	0.409161	0.425109	0.000596977	0.000244172
		AL20-37_BSE-image2_pyroxene_5	Grain 1		54.09	0.093	0.92	5.16	0.223	16.491	23.839	0.037	0.023	0.088		53.819	0.022	1.246	18.375	0.492	25.639	0.512	-0.002	0.018	0.121		734.183	8.9896		734.183		852.264	806.838	8.9896	0.286293	864.091	0.436593		0.287038		0.900235	0.00116426	0.00902306	0.0718199	0.00314361	0.409161	0.425109	0.000596977	0.000244172
		AL20-37_BSE-image2_pyroxene_6	Grain 2		54.09	0.093	0.92	5.16	0.223	16.491	23.839	0.037	0.023	0.088		53.966	0.017	1.168	18.379	0.537	26.114	0.344	0.009	0.014	0.076		738.722	11.3099		738.722		855.905	810.253	11.3099	-1.26552	884.034	0.444584		0.192068		0.900235	0.00116426	0.00902306	0.0718199	0.00314361	0.409161	0.425109	0.000596977	0.000244172
		AL20-37_BSE-image2_pyroxene_7	Grain 2		54.09	0.093	0.92	5.16	0.223	16.491	23.839	0.037	0.023	0.088		53.713	0.015	1.138	18.321	0.535	26.103	0.35	-0.01	0.005	0.125		738.309	10.9027		738.309		852.186	809.642	10.9027	-1.18019	880.534	0.445804		0.196116		0.900235	0.00116426	0.00902306	0.0718199	0.00314361	0.409161	0.425109	0.000596977	0.000244172
		AL20-37_BSE-image2_pyroxene_8	Grain 2		54.09	0.093	0.92	5.16	0.223	16.491	23.839	0.037	0.023	0.088		53.949	0.069	1.097	18.494	0.555	26.183	0.297	-0.002	0.019	0.074		738.832	11.798		738.832		853.889	811.139	11.798	-2.5605	888.229	0.442987		0.165753		0.900235	0.00116426	0.00902306	0.0718199	0.00314361	0.409161	0.425109	0.000596977	0.000244172
		AL20-37_BSE-image2_pyroxene_9	Grain 3		54.09	0.093	0.92	5.16	0.223	16.491	23.839	0.037	0.023	0.088		53.408	0.123	1.124	19.324	0.49	25.549	1.019	0	0.017	0.169		732.58	8.58986		732.58		857.602	811.474	8.58986	0.757252	860.656	0.413694		0.569978		0.900235	0.00116426	0.00902306	0.0718199	0.00314361	0.409161	0.425109	0.000596977	0.000244172
		AL20-37_BSE-image2_pyroxene_10	Grain 3		54.09	0.093	0.92	5.16	0.223	16.491	23.839	0.037	0.023	0.088		53.884	0.043	1.116	18.524	0.533	26.04	0.344	-0.002	0.023	0.12		737.344	11.1405		737.344		853.784	810.925	11.1405	-1.47875	882.577	0.439854		0.192257		0.900235	0.00116426	0.00902306	0.0718199	0.00314361	0.409161	0.425109	0.000596977	0.000244172
AL20-37_BSE-image2_cpx_7	Grain 3	AL20-37_BSE-image2_pyroxene_1	Grain 1		53.565	0.176	1.209	5.249	0.2	16.236	23.473	0.076	0.009	0.177		54.102	0.002	0.985	18.758	0.536	25.895	0.372	-0.012	0.001	0.095		756.847	11.6638		756.847		864.612	826.064	11.6638	-0.817027	908.516	0.4463		0.184703		0.891497	0.00220334	0.0118575	0.0730586	0.00281938	0.402834	0.418582	0.00122622	9.55455e-05
		AL20-37_BSE-image2_pyroxene_2	Grain 1		53.565	0.176	1.209	5.249	0.2	16.236	23.473	0.076	0.009	0.177		53.975	0.052	1.167	17.883	0.494	25.899	0.876	0.015	0.016	0.064		757.324	6.86005		757.324		864.58	818.488	6.86005	0.756651	866.466	0.468209		0.435154		0.891497	0.00220334	0.0118575	0.0730586	0.00281938	0.402834	0.418582	0.00122622	9.55455e-05
		AL20-37_BSE-image2_pyroxene_3	Grain 1		53.565	0.176	1.209	5.249	0.2	16.236	23.473	0.076	0.009	0.177		54.021	0.024	1.356	18.451	0.499	26.177	0.363	0.001	0.007	0.107		759.555	11.6389		759.555		870.068	827.262	11.6389	-0.990134	908.298	0.458667		0.179495		0.891497	0.00220334	0.0118575	0.0730586	0.00281938	0.402834	0.418582	0.00122622	9.55455e-05
		AL20-37_BSE-image2_pyroxene_4	Grain 1		53.565	0.176	1.209	5.249	0.2	16.236	23.473	0.076	0.009	0.177		53.877	0.048	1.39	18.372	0.466	26.205	0.324	-0.02	0.019	0.125		759.847	11.6849		759.847		869.62	828.565	11.6849	-1.97244	908.701	0.461132		0.160478		0.891497	0.00220334	0.0118575	0.0730586	0.00281938	0.402834	0.418582	0.00122622	9.55455e-05
		AL20-37_BSE-image2_pyroxene_5	Grain 1		53.565	0.176	1.209	5.249	0.2	16.236	23.473	0.076	0.009	0.177		53.819	0.022	1.246	18.375	0.492	25.639	0.512	-0.002	0.018	0.121		755.171	9.50753		755.171		864.518	822.53	9.50753	0.50766	889.641	0.451098		0.25516		0.891497	0.00220334	0.0118575	0.0730586	0.00281938	0.402834	0.418582	0.00122622	9.55455e-05
		AL20-37_BSE-image2_pyroxene_6	Grain 2		53.565	0.176	1.209	5.249	0.2	16.236	23.473	0.076	0.009	0.177		53.966	0.017	1.168	18.379	0.537	26.114	0.344	0.009	0.014	0.076		760.395	12.084		760.395		869.231	826.85	12.084	-1.37062	912.194	0.459356		0.170738		0.891497	0.00220334	0.0118575	0.0730586	0.00281938	0.402834	0.418582	0.00122622	9.55455e-05
		AL20-37_BSE-image2_pyroxene_7	Grain 2		53.565	0.176	1.209	5.249	0.2	16.236	23.473	0.076	0.009	0.177		53.713	0.015	1.138	18.321	0.535	26.103	0.35	-0.01	0.005	0.125		759.94	11.6608		759.94		865.335	826.165	11.6608	-1.2649	908.49	0.460616		0.174336		0.891497	0.00220334	0.0118575	0.0730586	0.00281938	0.402834	0.418582	0.00122622	9.55455e-05
		AL20-37_BSE-image2_pyroxene_8	Grain 2		53.565	0.176	1.209	5.249	0.2	16.236	23.473	0.076	0.009	0.177		53.949	0.069	1.097	18.494	0.555	26.183	0.297	-0.002	0.019	0.074		760.748	12.6949		760.748		867.614	828.143	12.6949	-2.82609	917.542	0.457705		0.147345		0.891497	0.00220334	0.0118575	0.0730586	0.00281938	0.402834	0.418582	0.00122622	9.55455e-05
		AL20-37_BSE-image2_pyroxene_9	Grain 3		53.565	0.176	1.209	5.249	0.2	16.236	23.473	0.076	0.009	0.177		53.408	0.123	1.124	19.324	0.49	25.549	1.019	0	0.017	0.169		752.869	8.85069		752.869		869.039	826.575	8.85069	1.30576	883.891	0.427439		0.506679		0.891497	0.00220334	0.0118575	0.0730586	0.00281938	0.402834	0.418582	0.00122622	9.55455e-05
		AL20-37_BSE-image2_pyroxene_10	Grain 3		53.565	0.176	1.209	5.249	0.2	16.236	23.473	0.076	0.009	0.177		53.884	0.043	1.116	18.524	0.533	26.04	0.344	-0.002	0.023	0.12		758.962	11.9137		758.962		867.041	827.547	11.9137	-1.5853	910.704	0.454468		0.170905		0.891497	0.00220334	0.0118575	0.0730586	0.00281938	0.402834	0.418582	0.00122622	9.55455e-05
AL20-37_BSE-image2_cpx_8	Grain 3	AL20-37_BSE-image2_pyroxene_1	Grain 1		54.078	0.016	0.688	4.878	0.21	16.616	23.748	0.053	0.014	0.101		54.102	0.002	0.985	18.758	0.536	25.895	0.372	-0.012	0.001	0.095		730.236	10.9231		730.236		848.921	806.979	10.9231	-0.744578	878.349	0.40527		0.208694		0.900035	0.000200303	0.00674768	0.0678948	0.00296035	0.412263	0.423486	0.00085513	0.000148626
		AL20-37_BSE-image2_pyroxene_2	Grain 1		54.078	0.016	0.688	4.878	0.21	16.616	23.748	0.053	0.014	0.101		53.975	0.052	1.167	17.883	0.494	25.899	0.876	0.015	0.016	0.064		731.716	6.54567		731.716		850.429	800.948	6.54567	0.279579	840.803	0.425165		0.491678		0.900035	0.000200303	0.00674768	0.0678948	0.00296035	0.412263	0.423486	0.00085513	0.000148626
		AL20-37_BSE-image2_pyroxene_3	Grain 1		54.078	0.016	0.688	4.878	0.21	16.616	23.748	0.053	0.014	0.101		54.021	0.024	1.356	18.451	0.499	26.177	0.363	0.001	0.007	0.107		732.77	10.8767		732.77		854.103	808.06	10.8767	-0.895563	877.951	0.4165		0.20281		0.900035	0.000200303	0.00674768	0.0678948	0.00296035	0.412263	0.423486	0.00085513	0.000148626
		AL20-37_BSE-image2_pyroxene_4	Grain 1		54.078	0.016	0.688	4.878	0.21	16.616	23.748	0.053	0.014	0.101		53.877	0.048	1.39	18.372	0.466	26.205	0.324	-0.02	0.019	0.125		732.872	10.8324		732.872		853.342	809.043	10.8324	-1.76043	877.571	0.418739		0.181324		0.900035	0.000200303	0.00674768	0.0678948	0.00296035	0.412263	0.423486	0.00085513	0.000148626
		AL20-37_BSE-image2_pyroxene_5	Grain 1		54.078	0.016	0.688	4.878	0.21	16.616	23.748	0.053	0.014	0.101		53.819	0.022	1.246	18.375	0.492	25.639	0.512	-0.002	0.018	0.121		729.093	8.97139		729.093		849.568	804.187	8.97139	0.318761	861.609	0.409627		0.288304		0.900035	0.000200303	0.00674768	0.0678948	0.00296035	0.412263	0.423486	0.00085513	0.000148626
		AL20-37_BSE-image2_pyroxene_6	Grain 2		54.078	0.016	0.688	4.878	0.21	16.616	23.748	0.053	0.014	0.101		53.966	0.017	1.168	18.379	0.537	26.114	0.344	0.009	0.014	0.076		733.485	11.2827		733.485		853.154	807.555	11.2827	-1.22711	881.433	0.417126		0.192915		0.900035	0.000200303	0.00674768	0.0678948	0.00296035	0.412263	0.423486	0.00085513	0.000148626
		AL20-37_BSE-image2_pyroxene_7	Grain 2		54.078	0.016	0.688	4.878	0.21	16.616	23.748	0.053	0.014	0.101		53.713	0.015	1.138	18.321	0.535	26.103	0.35	-0.01	0.005	0.125		733.091	10.8761		733.091		849.46	806.949	10.8761	-1.14172	877.946	0.41827		0.196981		0.900035	0.000200303	0.00674768	0.0678948	0.00296035	0.412263	0.423486	0.00085513	0.000148626
		AL20-37_BSE-image2_pyroxene_8	Grain 2		54.078	0.016	0.688	4.878	0.21	16.616	23.748	0.053	0.014	0.101		53.949	0.069	1.097	18.494	0.555	26.183	0.297	-0.002	0.019	0.074		733.567	11.7665		733.567		851.134	808.422	11.7665	-2.51731	885.583	0.415627		0.166484		0.900035	0.000200303	0.00674768	0.0678948	0.00296035	0.412263	0.423486	0.00085513	0.000148626
		AL20-37_BSE-image2_pyroxene_9	Grain 3		54.078	0.016	0.688	4.878	0.21	16.616	23.748	0.053	0.014	0.101		53.408	0.123	1.124	19.324	0.49	25.549	1.019	0	0.017	0.169		727.57	8.58069		727.57		854.906	808.819	8.58069	0.780695	858.258	0.388143		0.572493		0.900035	0.000200303	0.00674768	0.0678948	0.00296035	0.412263	0.423486	0.00085513	0.000148626
		AL20-37_BSE-image2_pyroxene_10	Grain 3		54.078	0.016	0.688	4.878	0.21	16.616	23.748	0.053	0.014	0.101		53.884	0.043	1.116	18.524	0.533	26.04	0.344	-0.002	0.023	0.12		732.127	11.1133		732.127		851.046	808.222	11.1133	-1.43952	879.98	0.412688		0.193105		0.900035	0.000200303	0.00674768	0.0678948	0.00296035	0.412263	0.423486	0.00085513	0.000148626
AL20-37_BSE-image2_cpx_9	Grain 4	AL20-37_BSE-image2_pyroxene_1	Grain 1		53.453	0.131	1.444	5.585	0.212	16.21	22.952	0.052	0.022	0.083		54.102	0.002	0.985	18.758	0.536	25.895	0.372	-0.012	0.001	0.095		816.737	13.2054		816.737		893.827	870.452	13.2054	-0.404506	983.442	0.47563		0.14904		0.889633	0.00163998	0.0141623	0.0777353	0.00298855	0.402189	0.409291	0.000838995	0.000233556
		AL20-37_BSE-image2_pyroxene_2	Grain 1		53.453	0.131	1.444	5.585	0.212	16.21	22.952	0.052	0.022	0.083		53.975	0.052	1.167	17.883	0.494	25.899	0.876	0.015	0.016	0.064		815.284	7.5144		815.284		890.262	859.152	7.5144	2.32004	931.065	0.49898		0.351134		0.889633	0.00163998	0.0141623	0.0777353	0.00298855	0.402189	0.409291	0.000838995	0.000233556
		AL20-37_BSE-image2_pyroxene_3	Grain 1		53.453	0.131	1.444	5.585	0.212	16.21	22.952	0.052	0.022	0.083		54.021	0.024	1.356	18.451	0.499	26.177	0.363	0.001	0.007	0.107		819.862	13.2253		819.862		899.84	871.932	13.2253	-0.621243	983.625	0.48881		0.144838		0.889633	0.00163998	0.0141623	0.0777353	0.00298855	0.402189	0.409291	0.000838995	0.000233556
		AL20-37_BSE-image2_pyroxene_4	Grain 1		53.453	0.131	1.444	5.585	0.212	16.21	22.952	0.052	0.022	0.083		53.877	0.048	1.39	18.372	0.466	26.205	0.324	-0.02	0.019	0.125		820.606	13.4593		820.606		900.122	874.01	13.4593	-1.84543	985.779	0.491437		0.129493		0.889633	0.00163998	0.0141623	0.0777353	0.00298855	0.402189	0.409291	0.000838995	0.000233556
		AL20-37_BSE-image2_pyroxene_5	Grain 1		53.453	0.131	1.444	5.585	0.212	16.21	22.952	0.052	0.022	0.083		53.819	0.022	1.246	18.375	0.492	25.639	0.512	-0.002	0.018	0.121		814.009	10.6235		814.009		892.029	865.124	10.6235	1.46663	959.679	0.480744		0.205894		0.889633	0.00163998	0.0141623	0.0777353	0.00298855	0.402189	0.409291	0.000838995	0.000233556
		AL20-37_BSE-image2_pyroxene_6	Grain 2		53.453	0.131	1.444	5.585	0.212	16.21	22.952	0.052	0.022	0.083		53.966	0.017	1.168	18.379	0.537	26.114	0.344	0.009	0.014	0.076		820.952	13.7517		820.952		899.274	871.745	13.7517	-1.10397	988.47	0.489544		0.137772		0.889633	0.00163998	0.0141623	0.0777353	0.00298855	0.402189	0.409291	0.000838995	0.000233556
		AL20-37_BSE-image2_pyroxene_7	Grain 2		53.453	0.131	1.444	5.585	0.212	16.21	22.952	0.052	0.022	0.083		53.713	0.015	1.138	18.321	0.535	26.103	0.35	-0.01	0.005	0.125		820.396	13.2941		820.396		894.967	870.87	13.2941	-0.954765	984.258	0.490887		0.140675		0.889633	0.00163998	0.0141623	0.0777353	0.00298855	0.402189	0.409291	0.000838995	0.000233556
		AL20-37_BSE-image2_pyroxene_8	Grain 2		53.453	0.131	1.444	5.585	0.212	16.21	22.952	0.052	0.022	0.083		53.949	0.069	1.097	18.494	0.555	26.183	0.297	-0.002	0.019	0.074		821.889	14.6274		821.889		898.61	874.072	14.6274	-2.90247	996.53	0.487785		0.118896		0.889633	0.00163998	0.0141623	0.0777353	0.00298855	0.402189	0.409291	0.000838995	0.000233556
		AL20-37_BSE-image2_pyroxene_9	Grain 3		53.453	0.131	1.444	5.585	0.212	16.21	22.952	0.052	0.022	0.083		53.408	0.123	1.124	19.324	0.49	25.549	1.019	0	0.017	0.169		809.869	9.41268		809.869		894.622	867.761	9.41268	2.95483	948.535	0.45553		0.408849		0.889633	0.00163998	0.0141623	0.0777353	0.00298855	0.402189	0.409291	0.000838995	0.000233556
		AL20-37_BSE-image2_pyroxene_10	Grain 3		53.453	0.131	1.444	5.585	0.212	16.21	22.952	0.052	0.022	0.083		53.884	0.043	1.116	18.524	0.533	26.04	0.344	-0.002	0.023	0.12		819.36	13.5798		819.36		896.923	872.515	13.5798	-1.32351	986.888	0.484336		0.137907		0.889633	0.00163998	0.0141623	0.0777353	0.00298855	0.402189	0.409291	0.000838995	0.000233556
AL20-37_BSE-image2_cpx_10	Grain 4	AL20-37_BSE-image2_pyroxene_1	Grain 1		53.355	0.142	1.568	5.186	0.235	16.126	23.266	0.079	0.014	0.12		54.102	0.002	0.985	18.758	0.536	25.895	0.372	-0.012	0.001	0.095		776.457	12.1909		776.457		870.324	839.172	12.1909	-0.691484	931.637	0.443951		0.170734		0.888002	0.00177769	0.0153784	0.0721818	0.00331278	0.400105	0.414891	0.00127463	0.000148626
		AL20-37_BSE-image2_pyroxene_2	Grain 1		53.355	0.142	1.568	5.186	0.235	16.126	23.266	0.079	0.014	0.12		53.975	0.052	1.167	17.883	0.494	25.899	0.876	0.015	0.016	0.064		776.409	7.08378		776.409		869.144	830.433	7.08378	1.28177	886.234	0.465745		0.402245		0.888002	0.00177769	0.0153784	0.0721818	0.00331278	0.400105	0.414891	0.00127463	0.000148626
		AL20-37_BSE-image2_pyroxene_3	Grain 1		53.355	0.142	1.568	5.186	0.235	16.126	23.266	0.079	0.014	0.12		54.021	0.024	1.356	18.451	0.499	26.177	0.363	0.001	0.007	0.107		779.3	12.1813		779.3		875.911	840.456	12.1813	-0.879848	931.552	0.456253		0.16592		0.888002	0.00177769	0.0153784	0.0721818	0.00331278	0.400105	0.414891	0.00127463	0.000148626
		AL20-37_BSE-image2_pyroxene_4	Grain 1		53.355	0.142	1.568	5.186	0.235	16.126	23.266	0.079	0.014	0.12		53.877	0.048	1.39	18.372	0.466	26.205	0.324	-0.02	0.019	0.125		779.736	12.2916		779.736		875.704	842.001	12.2916	-1.94533	932.532	0.458705		0.148342		0.888002	0.00177769	0.0153784	0.0721818	0.00331278	0.400105	0.414891	0.00127463	0.000148626
		AL20-37_BSE-image2_pyroxene_5	Grain 1		53.355	0.142	1.568	5.186	0.235	16.126	23.266	0.079	0.014	0.12		53.819	0.022	1.246	18.375	0.492	25.639	0.512	-0.002	0.018	0.121		774.484	9.88909		774.484		869.677	835.078	9.88909	0.822864	911.174	0.448724		0.235863		0.888002	0.00177769	0.0153784	0.0721818	0.00331278	0.400105	0.414891	0.00127463	0.000148626
		AL20-37_BSE-image2_pyroxene_6	Grain 2		53.355	0.142	1.568	5.186	0.235	16.126	23.266	0.079	0.014	0.12		53.966	0.017	1.168	18.379	0.537	26.114	0.344	0.009	0.014	0.076		780.212	12.6542		780.212		875.169	840.117	12.6542	-1.29589	935.756	0.456938		0.157825		0.888002	0.00177769	0.0153784	0.0721818	0.00331278	0.400105	0.414891	0.00127463	0.000148626
		AL20-37_BSE-image2_pyroxene_7	Grain 2		53.355	0.142	1.568	5.186	0.235	16.126	23.266	0.079	0.014	0.12		53.713	0.015	1.138	18.321	0.535	26.103	0.35	-0.01	0.005	0.125		779.733	12.2192		779.733		871.176	839.374	12.2192	-1.17486	931.889	0.458192		0.161152		0.888002	0.00177769	0.0153784	0.0721818	0.00331278	0.400105	0.414891	0.00127463	0.000148626
		AL20-37_BSE-image2_pyroxene_8	Grain 2		53.355	0.142	1.568	5.186	0.235	16.126	23.266	0.079	0.014	0.12		53.949	0.069	1.097	18.494	0.555	26.183	0.297	-0.002	0.019	0.074		780.741	13.3557		780.741		873.875	841.734	13.3557	-2.86971	941.992	0.455297		0.136202		0.888002	0.00177769	0.0153784	0.0721818	0.00331278	0.400105	0.414891	0.00127463	0.000148626
		AL20-37_BSE-image2_pyroxene_9	Grain 3		53.355	0.142	1.568	5.186	0.235	16.126	23.266	0.079	0.014	0.12		53.408	0.123	1.124	19.324	0.49	25.549	1.019	0	0.017	0.169		771.608	9.04285		771.608		873.53	838.661	9.04285	1.85938	903.65	0.42519		0.46836		0.888002	0.00177769	0.0153784	0.0721818	0.00331278	0.400105	0.414891	0.00127463	0.000148626
		AL20-37_BSE-image2_pyroxene_10	Grain 3		53.355	0.142	1.568	5.186	0.235	16.126	23.266	0.079	0.014	0.12		53.884	0.043	1.116	18.524	0.533	26.04	0.344	-0.002	0.023	0.12		778.731	12.4834		778.731		872.947	840.835	12.4834	-1.51196	934.238	0.452077		0.15798		0.888002	0.00177769	0.0153784	0.0721818	0.00331278	0.400105	0.414891	0.00127463	0.000148626
AL20-36_BSE-image1_cpx_1	Grain 1; Relict core 1	AL20-36_BSE-image1_pyroxene_1	Grain 1		52.529	0.154	1.951	7.865	0.268	14.532	22.716	0.164	0.021	0.006		52.205	0.056	1.089	23.642	0.7	21.754	0.676	0.009	0.006	0.035		774.833	20.4592		774.833		894.107	863.394	20.4592	4.93173	1017.77	0.497999		0.279966		0.874255	0.00192792	0.0191348	0.10947	0.00377797	0.360556	0.405083	0.00264606	0.000222939
		AL20-36_BSE-image1_pyroxene_2	Grain 1		52.529	0.154	1.951	7.865	0.268	14.532	22.716	0.164	0.021	0.006		52.536	0.028	1.216	22.396	0.669	21.413	2.229	0.007	0.014	-0.006		775.073	12.4865		775.073		896.607	854.106	12.4865	-1.2025	946.194	0.517464		0.918057		0.874255	0.00192792	0.0191348	0.10947	0.00377797	0.360556	0.405083	0.00264606	0.000222939
		AL20-36_BSE-image1_pyroxene_3	Grain 1		52.529	0.154	1.951	7.865	0.268	14.532	22.716	0.164	0.021	0.006		52.315	0.043	1.245	23.994	0.655	21.765	0.446	-0.011	0.016	0.021		777.128	23.108		777.128		901.466	870.515	23.108	3.77545	1041.55	0.490941		0.184167		0.874255	0.00192792	0.0191348	0.10947	0.00377797	0.360556	0.405083	0.00264606	0.000222939
		AL20-36_BSE-image1_pyroxene_4	Grain 1		52.529	0.154	1.951	7.865	0.268	14.532	22.716	0.164	0.021	0.006		52.404	0.028	1.268	23.522	0.626	21.937	0.459	-0.01	0.017	0.032		777.599	21.8009		777.599		900.5	867.622	21.8009	3.56557	1029.82	0.50475		0.189462		0.874255	0.00192792	0.0191348	0.10947	0.00377797	0.360556	0.405083	0.00264606	0.000222939
		AL20-36_BSE-image1_pyroxene_5	Grain 1		52.529	0.154	1.951	7.865	0.268	14.532	22.716	0.164	0.021	0.006		52.458	0.059	1.149	23.563	0.639	21.982	0.444	0	0.017	-0.038		777.701	21.8849		777.701		900.68	867.108	21.8849	3.27066	1030.57	0.504905		0.183308		0.874255	0.00192792	0.0191348	0.10947	0.00377797	0.360556	0.405083	0.00264606	0.000222939
		AL20-36_BSE-image1_pyroxene_6	Grain 1		52.529	0.154	1.951	7.865	0.268	14.532	22.716	0.164	0.021	0.006		52.585	0.044	1.127	21.377	0.618	21.19	3.194	0.019	0.015	-0.024		781.291	9.30584		781.291		911.162	858.029	9.30584	-7.12422	917.638	0.536485		1.31746		0.874255	0.00192792	0.0191348	0.10947	0.00377797	0.360556	0.405083	0.00264606	0.000222939
		AL20-36_BSE-image1_pyroxene_7	Grain 1		52.529	0.154	1.951	7.865	0.268	14.532	22.716	0.164	0.021	0.006		52.644	0.072	1.16	23.119	0.638	21.739	1.039	0.001	0.016	0.015		770.881	16.2265		770.881		890.198	855.774	16.2265	3.9111	979.771	0.508913		0.427951		0.874255	0.00192792	0.0191348	0.10947	0.00377797	0.360556	0.405083	0.00264606	0.000222939
		AL20-36_BSE-image1_pyroxene_8	Grain 1		52.529	0.154	1.951	7.865	0.268	14.532	22.716	0.164	0.021	0.006		52.58	0.002	1.158	23.215	0.629	21.982	0.666	-0.004	0.012	-0.013		774.691	18.9465		774.691		894.176	859.704	18.9465	4.72811	1004.19	0.512474		0.274731		0.874255	0.00192792	0.0191348	0.10947	0.00377797	0.360556	0.405083	0.00264606	0.000222939
		AL20-36_BSE-image1_pyroxene_9	Grain 1		52.529	0.154	1.951	7.865	0.268	14.532	22.716	0.164	0.021	0.006		52.414	0.085	1.125	23.134	0.619	21.948	0.419	0	0.022	0.007		777.871	21.167		777.871		899.975	866.298	21.167	2.2913	1024.13	0.513473		0.173514		0.874255	0.00192792	0.0191348	0.10947	0.00377797	0.360556	0.405083	0.00264606	0.000222939
		AL20-36_BSE-image1_pyroxene_10	Grain 1		52.529	0.154	1.951	7.865	0.268	14.532	22.716	0.164	0.021	0.006		52.473	0.017	1.121	23.531	0.641	21.93	0.533	-0.011	0.011	-0.022		775.671	20.7133		775.671		895.847	863.537	20.7133	4.32635	1020.05	0.504396		0.220169		0.874255	0.00192792	0.0191348	0.10947	0.00377797	0.360556	0.405083	0.00264606	0.000222939
AL20-36_BSE-image1_cpx_2	Grain 1; Relict core 1	AL20-36_BSE-image1_pyroxene_1	Grain 1		52.305	0.176	1.917	7.716	0.277	14.543	22.653	0.153	0.015	-0.001		52.205	0.056	1.089	23.642	0.7	21.754	0.676	0.009	0.006	0.035		772.968	20.4058		772.968		892.95	862.507	20.4058	4.90895	1017.07	0.488195		0.283527		0.870527	0.00220334	0.0188013	0.107396	0.00390485	0.360829	0.40396	0.00246858	0.000159242
		AL20-36_BSE-image1_pyroxene_2	Grain 1		52.305	0.176	1.917	7.716	0.277	14.543	22.653	0.153	0.015	-0.001		52.536	0.028	1.216	22.396	0.669	21.413	2.229	0.007	0.014	-0.006		773.451	12.4702		773.451		895.593	853.357	12.4702	-1.26614	945.841	0.507277		0.929735		0.870527	0.00220334	0.0188013	0.107396	0.00390485	0.360829	0.40396	0.00246858	0.000159242
		AL20-36_BSE-image1_pyroxene_3	Grain 1		52.305	0.176	1.917	7.716	0.277	14.543	22.653	0.153	0.015	-0.001		52.315	0.043	1.245	23.994	0.655	21.765	0.446	-0.011	0.016	0.021		775.149	23.0268		775.149		900.178	869.521	23.0268	3.78626	1040.6	0.481276		0.18651		0.870527	0.00220334	0.0188013	0.107396	0.00390485	0.360829	0.40396	0.00246858	0.000159242
		AL20-36_BSE-image1_pyroxene_4	Grain 1		52.305	0.176	1.917	7.716	0.277	14.543	22.653	0.153	0.015	-0.001		52.404	0.028	1.268	23.522	0.626	21.937	0.459	-0.01	0.017	0.032		775.643	21.722		775.643		899.223	866.642	21.722	3.57424	1028.89	0.494813		0.191872		0.870527	0.00220334	0.0188013	0.107396	0.00390485	0.360829	0.40396	0.00246858	0.000159242
		AL20-36_BSE-image1_pyroxene_5	Grain 1		52.305	0.176	1.917	7.716	0.277	14.543	22.653	0.153	0.015	-0.001		52.458	0.059	1.149	23.563	0.639	21.982	0.444	0	0.017	-0.038		775.737	21.8034		775.737		899.392	866.121	21.8034	3.28268	1029.62	0.494965		0.18564		0.870527	0.00220334	0.0188013	0.107396	0.00390485	0.360829	0.40396	0.00246858	0.000159242
		AL20-36_BSE-image1_pyroxene_6	Grain 1		52.305	0.176	1.917	7.716	0.277	14.543	22.653	0.153	0.015	-0.001		52.585	0.044	1.127	21.377	0.618	21.19	3.194	0.019	0.015	-0.024		779.739	9.2945		779.739		910.135	857.289	9.2945	-7.19162	917.334	0.525923		1.33422		0.870527	0.00220334	0.0188013	0.107396	0.00390485	0.360829	0.40396	0.00246858	0.000159242
		AL20-36_BSE-image1_pyroxene_7	Grain 1		52.305	0.176	1.917	7.716	0.277	14.543	22.653	0.153	0.015	-0.001		52.644	0.072	1.16	23.119	0.638	21.739	1.039	0.001	0.016	0.015		769.142	16.1915		769.142		889.125	854.962	16.1915	3.86822	979.245	0.498895		0.433395		0.870527	0.00220334	0.0188013	0.107396	0.00390485	0.360829	0.40396	0.00246858	0.000159242
		AL20-36_BSE-image1_pyroxene_8	Grain 1		52.305	0.176	1.917	7.716	0.277	14.543	22.653	0.153	0.015	-0.001		52.58	0.002	1.158	23.215	0.629	21.982	0.666	-0.004	0.012	-0.013		772.846	18.8921		772.846		893.016	858.821	18.8921	4.70766	1003.49	0.502385		0.278226		0.870527	0.00220334	0.0188013	0.107396	0.00390485	0.360829	0.40396	0.00246858	0.000159242
		AL20-36_BSE-image1_pyroxene_9	Grain 1		52.305	0.176	1.917	7.716	0.277	14.543	22.653	0.153	0.015	-0.001		52.414	0.085	1.125	23.134	0.619	21.948	0.419	0	0.022	0.007		775.906	21.0809		775.906		898.671	865.297	21.0809	2.30969	1023.13	0.503364		0.175721		0.870527	0.00220334	0.0188013	0.107396	0.00390485	0.360829	0.40396	0.00246858	0.000159242
		AL20-36_BSE-image1_pyroxene_10	Grain 1		52.305	0.176	1.917	7.716	0.277	14.543	22.653	0.153	0.015	-0.001		52.473	0.017	1.121	23.531	0.641	21.93	0.533	-0.011	0.011	-0.022		773.764	20.6455		773.764		894.628	862.602	20.6455	4.32187	1019.23	0.494466		0.22297		0.870527	0.00220334	0.0188013	0.107396	0.00390485	0.360829	0.40396	0.00246858	0.000159242
AL20-36_BSE-image1_cpx_3	Grain 1; Relict core 1	AL20-36_BSE-image1_pyroxene_1	Grain 1		52.581	0.249	2.012	7.85	0.236	14.435	22.758	0.161	0.016	-0.009		52.205	0.056	1.089	23.642	0.7	21.754	0.676	0.009	0.006	0.035		773.883	20.433		773.883		888.05	856.763	20.433	5.05166	1016.55	0.500389		0.281705		0.87512	0.00311722	0.019733	0.109261	0.00332687	0.358149	0.405832	0.00259766	0.000169859
		AL20-36_BSE-image1_pyroxene_2	Grain 1		52.581	0.249	2.012	7.85	0.236	14.435	22.758	0.161	0.016	-0.009		52.536	0.028	1.216	22.396	0.669	21.413	2.229	0.007	0.014	-0.006		774.138	12.4785		774.138		890.588	847.674	12.4785	-1.10733	945.186	0.519948		0.92376		0.87512	0.00311722	0.019733	0.109261	0.00332687	0.358149	0.405832	0.00259766	0.000169859
		AL20-36_BSE-image1_pyroxene_3	Grain 1		52.581	0.249	2.012	7.85	0.236	14.435	22.758	0.161	0.016	-0.009		52.315	0.043	1.245	23.994	0.655	21.765	0.446	-0.011	0.016	0.021		776.156	23.0681		776.156		895.254	863.73	23.0681	3.91343	1040.19	0.493297		0.185311		0.87512	0.00311722	0.019733	0.109261	0.00332687	0.358149	0.405832	0.00259766	0.000169859
		AL20-36_BSE-image1_pyroxene_4	Grain 1		52.581	0.249	2.012	7.85	0.236	14.435	22.758	0.161	0.016	-0.009		52.404	0.028	1.268	23.522	0.626	21.937	0.459	-0.01	0.017	0.032		776.62	21.7621		776.62		894.306	860.885	21.7621	3.70168	1028.47	0.507173		0.190639		0.87512	0.00311722	0.019733	0.109261	0.00332687	0.358149	0.405832	0.00259766	0.000169859
		AL20-36_BSE-image1_pyroxene_5	Grain 1		52.581	0.249	2.012	7.85	0.236	14.435	22.758	0.161	0.016	-0.009		52.458	0.059	1.149	23.563	0.639	21.982	0.444	0	0.017	-0.038		776.719	21.8449		776.719		894.478	860.375	21.8449	3.40847	1029.21	0.507329		0.184447		0.87512	0.00311722	0.019733	0.109261	0.00332687	0.358149	0.405832	0.00259766	0.000169859
		AL20-36_BSE-image1_pyroxene_6	Grain 1		52.581	0.249	2.012	7.85	0.236	14.435	22.758	0.161	0.016	-0.009		52.585	0.044	1.127	21.377	0.618	21.19	3.194	0.019	0.015	-0.024		780.348	9.30027		780.348		904.957	851.546	9.30027	-7.03284	916.673	0.53906		1.32565		0.87512	0.00311722	0.019733	0.109261	0.00332687	0.358149	0.405832	0.00259766	0.000169859
		AL20-36_BSE-image1_pyroxene_7	Grain 1		52.581	0.249	2.012	7.85	0.236	14.435	22.758	0.161	0.016	-0.009		52.644	0.072	1.16	23.119	0.638	21.739	1.039	0.001	0.016	0.015		769.937	16.2093		769.937		884.229	849.288	16.2093	4.01864	978.655	0.511356		0.43061		0.87512	0.00311722	0.019733	0.109261	0.00332687	0.358149	0.405832	0.00259766	0.000169859
		AL20-36_BSE-image1_pyroxene_8	Grain 1		52.581	0.249	2.012	7.85	0.236	14.435	22.758	0.161	0.016	-0.009		52.58	0.002	1.158	23.215	0.629	21.982	0.666	-0.004	0.012	-0.013		773.73	18.9198		773.73		888.116	853.127	18.9198	4.84823	1002.97	0.514934		0.276437		0.87512	0.00311722	0.019733	0.109261	0.00332687	0.358149	0.405832	0.00259766	0.000169859
		AL20-36_BSE-image1_pyroxene_9	Grain 1		52.581	0.249	2.012	7.85	0.236	14.435	22.758	0.161	0.016	-0.009		52.414	0.085	1.125	23.134	0.619	21.948	0.419	0	0.022	0.007		776.879	21.1247		776.879		893.774	859.57	21.1247	2.43178	1022.75	0.515937		0.174592		0.87512	0.00311722	0.019733	0.109261	0.00332687	0.358149	0.405832	0.00259766	0.000169859
		AL20-36_BSE-image1_pyroxene_10	Grain 1		52.581	0.249	2.012	7.85	0.236	14.435	22.758	0.161	0.016	-0.009		52.473	0.017	1.121	23.531	0.641	21.93	0.533	-0.011	0.011	-0.022		774.702	20.68		774.702		889.739	856.88	20.68	4.45537	1018.76	0.506817		0.221537		0.87512	0.00311722	0.019733	0.109261	0.00332687	0.358149	0.405832	0.00259766	0.000169859
AL20-26_BSE-image1_cpx_1	Grain 1; Relict core	AL20-26_BSE-image1_px_1	Grain 1; Relict core		52.506	0.24	2.067	5.714	0.14	15.435	23.045	0.138	0.016	0.05		53.507	0.093	1.464	19.276	0.39	25.042	0.314	0.001	0.008	0.041		761.393	13.8134		761.393		881.914	841.322	13.8134	-2.75068	925.848	0.480934		0.145688		0.873872	0.00300455	0.0202725	0.0795308	0.00197357	0.382961	0.41095	0.00222656	0.000169859
		AL20-26_BSE-image1_px_2	Grain 1; Relict core		52.506	0.24	2.067	5.714	0.14	15.435	23.045	0.138	0.016	0.05		53.256	0.069	1.515	19.249	0.387	25.221	0.357	-0.005	0.011	0.106		761.419	13.1702		761.419		879.564	840.834	13.1702	-1.52565	920.224	0.485051		0.165727		0.873872	0.00300455	0.0202725	0.0795308	0.00197357	0.382961	0.41095	0.00222656	0.000169859
		AL20-26_BSE-image1_px_3	Grain 1; Relict core		52.506	0.24	2.067	5.714	0.14	15.435	23.045	0.138	0.016	0.05		53.201	0.124	1.399	19.049	0.436	25.213	0.469	0.01	0.025	0.119		759.359	11.0756		759.359		871.828	834.778	11.0756	-0.411781	901.912	0.489989		0.218001		0.873872	0.00300455	0.0202725	0.0795308	0.00197357	0.382961	0.41095	0.00222656	0.000169859
		AL20-26_BSE-image1_px_4	Grain 1; Relict core		52.506	0.24	2.067	5.714	0.14	15.435	23.045	0.138	0.016	0.05		53.472	0.04	1.297	18.879	0.382	24.664	1.359	0.016	0.02	0.038		758.849	7.42519		758.849		879.836	833.07	7.42519	-0.440254	869.997	0.483635		0.631347		0.873872	0.00300455	0.0202725	0.0795308	0.00197357	0.382961	0.41095	0.00222656	0.000169859
		AL20-26_BSE-image1_px_5	Grain 1; Relict core		52.506	0.24	2.067	5.714	0.14	15.435	23.045	0.138	0.016	0.05		53.226	0.102	1.435	19.38	0.425	24.692	0.726	0.009	0.014	0.061		754.621	9.57352		754.621		870.666	831.524	9.57352	0.954226	888.779	0.471668		0.337935		0.873872	0.00300455	0.0202725	0.0795308	0.00197357	0.382961	0.41095	0.00222656	0.000169859
		AL20-26_BSE-image1_px_6	Grain 2; relict core		52.506	0.24	2.067	5.714	0.14	15.435	23.045	0.138	0.016	0.05		53.477	0.075	1.547	18.959	0.42	25.473	0.49	0.009	0.01	0.047		760.701	10.864		760.701		873.348	832.852	10.864	0.241427	900.061	0.497391		0.226426		0.873872	0.00300455	0.0202725	0.0795308	0.00197357	0.382961	0.41095	0.00222656	0.000169859
		AL20-26_BSE-image1_px_7	Grain 2; relict core		52.506	0.24	2.067	5.714	0.14	15.435	23.045	0.138	0.016	0.05		53.482	0.062	1.413	18.946	0.434	25.705	0.376	0.004	0.018	0.053		763.903	12.4664		763.903		875.58	836.628	12.4664	-1.15805	914.071	0.502266		0.173763		0.873872	0.00300455	0.0202725	0.0795308	0.00197357	0.382961	0.41095	0.00222656	0.000169859
		AL20-26_BSE-image1_px_8	Grain 2; relict core		52.506	0.24	2.067	5.714	0.14	15.435	23.045	0.138	0.016	0.05		53.44	0.047	1.274	18.619	0.366	25.477	0.341	0.006	0.013	0.016		764.684	12.5531		764.684		881.534	839.125	12.5531	-2.00418	914.829	0.506554		0.158654		0.873872	0.00300455	0.0202725	0.0795308	0.00197357	0.382961	0.41095	0.00222656	0.000169859
		AL20-26_BSE-image1_px_9	Grain 3; relict core		52.506	0.24	2.067	5.714	0.14	15.435	23.045	0.138	0.016	0.05		53.241	0.036	1.467	18.97	0.343	24.989	0.707	-0.003	0.012	0.055		757.254	9.18679		757.254		875.1	833.013	9.18679	1.19682	885.398	0.487658		0.329136		0.873872	0.00300455	0.0202725	0.0795308	0.00197357	0.382961	0.41095	0.00222656	0.000169859
		AL20-26_BSE-image1_px_10	Grain 3; relict core		52.506	0.24	2.067	5.714	0.14	15.435	23.045	0.138	0.016	0.05		53.096	0.007	1.666	19.068	0.368	25.219	0.296	0	0.031	0.019		765.35	14.9159		765.35		887.878	843.91	14.9159	-2.50855	935.486	0.489617		0.137803		0.873872	0.00300455	0.0202725	0.0795308	0.00197357	0.382961	0.41095	0.00222656	0.000169859
AL20-26_BSE-image1_cpx_2	Grain 1; Relict core	AL20-26_BSE-image1_px_1	Grain 1; Relict core		52.851	0.155	1.669	5.772	0.196	15.612	23.217	0.109	0.013	0.138		53.507	0.093	1.464	19.276	0.39	25.042	0.314	0.001	0.008	0.041		753.914	13.4151		753.914		881.961	834.979	13.4151	-2.47633	918.304	0.480308		0.153158		0.879614	0.00194044	0.016369	0.0803381	0.002763	0.387352	0.414017	0.00175866	0.00013801
		AL20-26_BSE-image1_px_2	Grain 1; Relict core		52.851	0.155	1.669	5.772	0.196	15.612	23.217	0.109	0.013	0.138		53.256	0.069	1.515	19.249	0.387	25.221	0.357	-0.005	0.011	0.106		754.031	12.82		754.031		879.798	834.646	12.82	-1.31442	913.118	0.48442		0.174224		0.879614	0.00194044	0.016369	0.0803381	0.002763	0.387352	0.414017	0.00175866	0.00013801
		AL20-26_BSE-image1_px_3	Grain 1; Relict core		52.851	0.155	1.669	5.772	0.196	15.612	23.217	0.109	0.013	0.138		53.201	0.124	1.399	19.049	0.436	25.213	0.469	0.01	0.025	0.119		752.149	10.8094		752.149		872.377	828.932	10.8094	-0.309681	895.6	0.489351		0.229178		0.879614	0.00194044	0.016369	0.0803381	0.002763	0.387352	0.414017	0.00175866	0.00013801
		AL20-26_BSE-image1_px_4	Grain 1; Relict core		52.851	0.155	1.669	5.772	0.196	15.612	23.217	0.109	0.013	0.138		53.472	0.04	1.297	18.879	0.382	24.664	1.359	0.016	0.02	0.038		752.039	7.33327		752.039		881.071	827.773	7.33327	-0.563276	865.312	0.483006		0.663717		0.879614	0.00194044	0.016369	0.0803381	0.002763	0.387352	0.414017	0.00175866	0.00013801
		AL20-26_BSE-image1_px_5	Grain 1; Relict core		52.851	0.155	1.669	5.772	0.196	15.612	23.217	0.109	0.013	0.138		53.226	0.102	1.435	19.38	0.425	24.692	0.726	0.009	0.014	0.061		747.669	9.40178		747.669		871.572	826.007	9.40178	0.936099	883.335	0.471054		0.355261		0.879614	0.00194044	0.016369	0.0803381	0.002763	0.387352	0.414017	0.00175866	0.00013801
		AL20-26_BSE-image1_px_6	Grain 2; relict core		52.851	0.155	1.669	5.772	0.196	15.612	23.217	0.109	0.013	0.138		53.477	0.075	1.547	18.959	0.42	25.473	0.49	0.009	0.01	0.047		753.492	10.6077		753.492		873.937	827.063	10.6077	0.329742	893.842	0.496744		0.238035		0.879614	0.00194044	0.016369	0.0803381	0.002763	0.387352	0.414017	0.00175866	0.00013801
		AL20-26_BSE-image1_px_7	Grain 2; relict core		52.851	0.155	1.669	5.772	0.196	15.612	23.217	0.109	0.013	0.138		53.482	0.062	1.413	18.946	0.434	25.705	0.376	0.004	0.018	0.053		756.506	12.1324		756.506		875.874	830.551	12.1324	-0.969827	907.128	0.501612		0.182672		0.879614	0.00194044	0.016369	0.0803381	0.002763	0.387352	0.414017	0.00175866	0.00013801
		AL20-26_BSE-image1_px_8	Grain 2; relict core		52.851	0.155	1.669	5.772	0.196	15.612	23.217	0.109	0.013	0.138		53.44	0.047	1.274	18.619	0.366	25.477	0.341	0.006	0.013	0.016		757.211	12.1873		757.211		881.708	832.914	12.1873	-1.77499	907.606	0.505894		0.166788		0.879614	0.00194044	0.016369	0.0803381	0.002763	0.387352	0.414017	0.00175866	0.00013801
		AL20-26_BSE-image1_px_9	Grain 3; relict core		52.851	0.155	1.669	5.772	0.196	15.612	23.217	0.109	0.013	0.138		53.241	0.036	1.467	18.97	0.343	24.989	0.707	-0.003	0.012	0.055		750.251	9.01046		750.251		875.998	827.463	9.01046	1.18282	879.926	0.487023		0.346012		0.879614	0.00194044	0.016369	0.0803381	0.002763	0.387352	0.414017	0.00175866	0.00013801
		AL20-26_BSE-image1_px_10	Grain 3; relict core		52.851	0.155	1.669	5.772	0.196	15.612	23.217	0.109	0.013	0.138		53.096	0.007	1.666	19.068	0.368	25.219	0.296	0	0.031	0.019		757.786	14.4947		757.786		887.837	837.458	14.4947	-2.20628	927.711	0.488979		0.144868		0.879614	0.00194044	0.016369	0.0803381	0.002763	0.387352	0.414017	0.00175866	0.00013801
AL20-26_BSE-image1_cpx_3	Grain 1; Relict core	AL20-26_BSE-image1_px_1	Grain 1; Relict core		52.557	0.238	2.308	6.155	0.173	15.466	22.784	0.164	0.014	0.193		53.507	0.093	1.464	19.276	0.39	25.042	0.314	0.001	0.008	0.041		803.462	15.2894		803.462		917.059	881.869	15.2894	-3.17423	980.28	0.517014		0.123392		0.874721	0.00297951	0.0226361	0.0856689	0.00243877	0.38373	0.406296	0.00264606	0.000148626
		AL20-26_BSE-image1_px_2	Grain 1; Relict core		52.557	0.238	2.308	6.155	0.173	15.466	22.784	0.164	0.014	0.193		53.256	0.069	1.515	19.249	0.387	25.221	0.357	-0.005	0.011	0.106		803.1	14.4676		803.1		913.773	880.724	14.4676	-1.71768	972.85	0.52144		0.140364		0.874721	0.00297951	0.0226361	0.0856689	0.00243877	0.38373	0.406296	0.00264606	0.000148626
		AL20-26_BSE-image1_px_3	Grain 1; Relict core		52.557	0.238	2.308	6.155	0.173	15.466	22.784	0.164	0.014	0.193		53.201	0.124	1.399	19.049	0.436	25.213	0.469	0.01	0.025	0.119		800.197	12.062		800.197		904.153	873.037	12.062	-0.207806	951.097	0.526747		0.184638		0.874721	0.00297951	0.0226361	0.0856689	0.00243877	0.38373	0.406296	0.00264606	0.000148626
		AL20-26_BSE-image1_px_4	Grain 1; Relict core		52.557	0.238	2.308	6.155	0.173	15.466	22.784	0.164	0.014	0.193		53.472	0.04	1.297	18.879	0.382	24.664	1.359	0.016	0.02	0.038		797.768	7.76577		797.768		910.086	869.018	7.76577	0.578206	912.249	0.519918		0.534726		0.874721	0.00297951	0.0226361	0.0856689	0.00243877	0.38373	0.406296	0.00264606	0.000148626
		AL20-26_BSE-image1_px_5	Grain 1; Relict core		52.557	0.238	2.308	6.155	0.173	15.466	22.784	0.164	0.014	0.193		53.226	0.102	1.435	19.38	0.425	24.692	0.726	0.009	0.014	0.061		794.218	10.2098		794.218		901.479	868.316	10.2098	1.59067	934.349	0.507052		0.286218		0.874721	0.00297951	0.0226361	0.0856689	0.00243877	0.38373	0.406296	0.00264606	0.000148626
		AL20-26_BSE-image1_px_6	Grain 2; relict core		52.557	0.238	2.308	6.155	0.173	15.466	22.784	0.164	0.014	0.193		53.477	0.075	1.547	18.959	0.42	25.473	0.49	0.009	0.01	0.047		801.559	11.8136		801.559		905.638	870.808	11.8136	0.497491	948.851	0.534706		0.191774		0.874721	0.00297951	0.0226361	0.0856689	0.00243877	0.38373	0.406296	0.00264606	0.000148626
		AL20-26_BSE-image1_px_7	Grain 2; relict core		52.557	0.238	2.308	6.155	0.173	15.466	22.784	0.164	0.014	0.193		53.482	0.062	1.413	18.946	0.434	25.705	0.376	0.004	0.018	0.053		805.658	13.7039		805.658		909.226	875.908	13.7039	-1.26306	965.943	0.539946		0.14717		0.874721	0.00297951	0.0226361	0.0856689	0.00243877	0.38373	0.406296	0.00264606	0.000148626
		AL20-26_BSE-image1_px_8	Grain 2; relict core		52.557	0.238	2.308	6.155	0.173	15.466	22.784	0.164	0.014	0.193		53.44	0.047	1.274	18.619	0.366	25.477	0.341	0.006	0.013	0.016		806.77	13.9084		806.77		916.143	879.045	13.9084	-2.25867	967.793	0.544555		0.134374		0.874721	0.00297951	0.0226361	0.0856689	0.00243877	0.38373	0.406296	0.00264606	0.000148626
		AL20-26_BSE-image1_px_9	Grain 3; relict core		52.557	0.238	2.308	6.155	0.173	15.466	22.784	0.164	0.014	0.193		53.241	0.036	1.467	18.97	0.343	24.989	0.707	-0.003	0.012	0.055		797.109	9.84009		797.109		906.303	869.996	9.84009	1.82117	931.005	0.524242		0.278766		0.874721	0.00297951	0.0226361	0.0856689	0.00243877	0.38373	0.406296	0.00264606	0.000148626
		AL20-26_BSE-image1_px_10	Grain 3; relict core		52.557	0.238	2.308	6.155	0.173	15.466	22.784	0.164	0.014	0.193		53.096	0.007	1.666	19.068	0.368	25.219	0.296	0	0.031	0.019		807.894	16.4763		807.894		923.871	885.004	16.4763	-3.02852	991.012	0.526348		0.116714		0.874721	0.00297951	0.0226361	0.0856689	0.00243877	0.38373	0.406296	0.00264606	0.000148626
AL20-26_BSE-image1_cpx_4	Grain 1; Relict core	AL20-26_BSE-image1_px_1	Grain 1; Relict core		52.675	0.222	2.087	6.057	0.18	15.415	22.997	0.139	0.015	0.08		53.507	0.093	1.464	19.276	0.39	25.042	0.314	0.001	0.008	0.041		778.899	14.3355		778.899		894.592	854.897	14.3355	-2.73435	948.303	0.510465		0.136936		0.876685	0.00277921	0.0204686	0.0843049	0.00253744	0.382464	0.410094	0.0022427	0.000159242
		AL20-26_BSE-image1_px_2	Grain 1; Relict core		52.675	0.222	2.087	6.057	0.18	15.415	22.997	0.139	0.015	0.08		53.256	0.069	1.515	19.249	0.387	25.221	0.357	-0.005	0.011	0.106		778.777	13.6291		778.777		891.923	854.191	13.6291	-1.42796	942.035	0.514835		0.155771		0.876685	0.00277921	0.0204686	0.0843049	0.00253744	0.382464	0.410094	0.0022427	0.000159242
		AL20-26_BSE-image1_px_3	Grain 1; Relict core		52.675	0.222	2.087	6.057	0.18	15.415	22.997	0.139	0.015	0.08		53.201	0.124	1.399	19.049	0.436	25.213	0.469	0.01	0.025	0.119		776.366	11.4245		776.366		883.54	847.593	11.4245	-0.176367	922.475	0.520075		0.204904		0.876685	0.00277921	0.0204686	0.0843049	0.00253744	0.382464	0.410094	0.0022427	0.000159242
		AL20-26_BSE-image1_px_4	Grain 1; Relict core		52.675	0.222	2.087	6.057	0.18	15.415	22.997	0.139	0.015	0.08		53.472	0.04	1.297	18.879	0.382	24.664	1.359	0.016	0.02	0.038		775.081	7.54566		775.081		890.858	845.114	7.54566	0.0789466	888.058	0.513332		0.593418		0.876685	0.00277921	0.0204686	0.0843049	0.00253744	0.382464	0.410094	0.0022427	0.000159242
		AL20-26_BSE-image1_px_5	Grain 1; Relict core		52.675	0.222	2.087	6.057	0.18	15.415	22.997	0.139	0.015	0.08		53.226	0.102	1.435	19.38	0.425	24.692	0.726	0.009	0.014	0.061		771.135	9.7986		771.135		881.864	843.851	9.7986	1.34016	908.048	0.50063		0.317633		0.876685	0.00277921	0.0204686	0.0843049	0.00253744	0.382464	0.410094	0.0022427	0.000159242
		AL20-26_BSE-image1_px_6	Grain 2; relict core		52.675	0.222	2.087	6.057	0.18	15.415	22.997	0.139	0.015	0.08		53.477	0.075	1.547	18.959	0.42	25.473	0.49	0.009	0.01	0.047		777.717	11.1999		777.717		885.05	845.567	11.1999	0.495333	920.481	0.527933		0.212823		0.876685	0.00277921	0.0204686	0.0843049	0.00253744	0.382464	0.410094	0.0022427	0.000159242
		AL20-26_BSE-image1_px_7	Grain 2; relict core		52.675	0.222	2.087	6.057	0.18	15.415	22.997	0.139	0.015	0.08		53.482	0.062	1.413	18.946	0.434	25.705	0.376	0.004	0.018	0.053		781.283	12.9042		781.283		887.743	849.783	12.9042	-1.02974	935.603	0.533107		0.163324		0.876685	0.00277921	0.0204686	0.0843049	0.00253744	0.382464	0.410094	0.0022427	0.000159242
		AL20-26_BSE-image1_px_8	Grain 2; relict core		52.675	0.222	2.087	6.057	0.18	15.415	22.997	0.139	0.015	0.08		53.44	0.047	1.274	18.619	0.366	25.477	0.341	0.006	0.013	0.016		782.185	13.0325		782.185		894.031	852.492	13.0325	-1.92857	936.742	0.537658		0.149123		0.876685	0.00277921	0.0204686	0.0843049	0.00253744	0.382464	0.410094	0.0022427	0.000159242
		AL20-26_BSE-image1_px_9	Grain 3; relict core		52.675	0.222	2.087	6.057	0.18	15.415	22.997	0.139	0.015	0.08		53.241	0.036	1.467	18.97	0.343	24.989	0.707	-0.003	0.012	0.055		773.862	9.41789		773.862		886.437	845.403	9.41789	1.57862	904.67	0.517602		0.309363		0.876685	0.00277921	0.0204686	0.0843049	0.00253744	0.382464	0.410094	0.0022427	0.000159242
AL20-26_BSE-image1_cpx_5	Grain 1; Relict core	AL20-26_BSE-image1_px_10	Grain 3; relict core		52.61	0.259	1.98	5.772	0.197	15.294	22.957	0.141	0.011	0.083		53.096	0.007	1.666	19.068	0.368	25.219	0.296	0	0.031	0.019		774.618	15.2234		774.618		885.337	839.566	15.2234	-2.09166	948.898	0.499146		0.133064		0.875603	0.00324241	0.0194192	0.0803381	0.00277709	0.379462	0.409381	0.00227497	0.000116778
		AL20-26_BSE-image1_px_1	Grain 1; Relict core		52.61	0.259	1.98	5.772	0.197	15.294	22.957	0.141	0.011	0.083		53.507	0.093	1.464	19.276	0.39	25.042	0.314	0.001	0.008	0.041		770.561	14.1044		770.561		879.342	836.952	14.1044	-2.31508	939.027	0.490295		0.140678		0.875603	0.00324241	0.0194192	0.0803381	0.00277709	0.379462	0.409381	0.00227497	0.000116778
		AL20-26_BSE-image1_px_2	Grain 1; Relict core		52.61	0.259	1.98	5.772	0.197	15.294	22.957	0.141	0.011	0.083		53.256	0.069	1.515	19.249	0.387	25.221	0.357	-0.005	0.011	0.106		770.512	13.4259		770.512		876.871	836.362	13.4259	-1.04433	933.043	0.494492		0.160028		0.875603	0.00324241	0.0194192	0.0803381	0.00277709	0.379462	0.409381	0.00227497	0.000116778
		AL20-26_BSE-image1_px_3	Grain 1; Relict core		52.61	0.259	1.98	5.772	0.197	15.294	22.957	0.141	0.011	0.083		53.201	0.124	1.399	19.049	0.436	25.213	0.469	0.01	0.025	0.119		768.284	11.2701		768.284		868.951	830.183	11.2701	0.147505	914.028	0.499525		0.210504		0.875603	0.00324241	0.0194192	0.0803381	0.00277709	0.379462	0.409381	0.00227497	0.000116778
		AL20-26_BSE-image1_px_4	Grain 1; Relict core		52.61	0.259	1.98	5.772	0.197	15.294	22.957	0.141	0.011	0.083		53.472	0.04	1.297	18.879	0.382	24.664	1.359	0.016	0.02	0.038		767.394	7.49232		767.394		876.416	828.11	7.49232	0.279487	880.708	0.493049		0.609635		0.875603	0.00324241	0.0194192	0.0803381	0.00277709	0.379462	0.409381	0.00227497	0.000116778
		AL20-26_BSE-image1_px_5	Grain 1; Relict core		52.61	0.259	1.98	5.772	0.197	15.294	22.957	0.141	0.011	0.083		53.226	0.102	1.435	19.38	0.425	24.692	0.726	0.009	0.014	0.061		763.297	9.69894		763.297		867.536	826.758	9.69894	1.59853	900.171	0.480848		0.326313		0.875603	0.00324241	0.0194192	0.0803381	0.00277709	0.379462	0.409381	0.00227497	0.000116778
		AL20-26_BSE-image1_px_6	Grain 2; relict core		52.61	0.259	1.98	5.772	0.197	15.294	22.957	0.141	0.011	0.083		53.477	0.075	1.547	18.959	0.42	25.473	0.49	0.009	0.01	0.047		769.632	11.0512		769.632		870.434	828.257	11.0512	0.811075	912.098	0.507072		0.218639		0.875603	0.00324241	0.0194192	0.0803381	0.00277709	0.379462	0.409381	0.00227497	0.000116778
		AL20-26_BSE-image1_px_7	Grain 2; relict core		52.61	0.259	1.98	5.772	0.197	15.294	22.957	0.141	0.011	0.083		53.482	0.062	1.413	18.946	0.434	25.705	0.376	0.004	0.018	0.053		773.014	12.7103		773.014		872.867	832.164	12.7103	-0.659433	926.732	0.512042		0.167787		0.875603	0.00324241	0.0194192	0.0803381	0.00277709	0.379462	0.409381	0.00227497	0.000116778
		AL20-26_BSE-image1_px_8	Grain 2; relict core		52.61	0.259	1.98	5.772	0.197	15.294	22.957	0.141	0.011	0.083		53.44	0.047	1.274	18.619	0.366	25.477	0.341	0.006	0.013	0.016		773.859	12.8203		773.859		878.873	834.705	12.8203	-1.53506	927.702	0.516413		0.153198		0.875603	0.00324241	0.0194192	0.0803381	0.00277709	0.379462	0.409381	0.00227497	0.000116778
		AL20-26_BSE-image1_px_9	Grain 3; relict core		52.61	0.259	1.98	5.772	0.197	15.294	22.957	0.141	0.011	0.083		53.241	0.036	1.467	18.97	0.343	24.989	0.707	-0.003	0.012	0.055		765.984	9.31556		765.984		871.951	828.24	9.31556	1.83887	896.79	0.497149		0.317817		0.875603	0.00324241	0.0194192	0.0803381	0.00277709	0.379462	0.409381	0.00227497	0.000116778
		AL20-26_BSE-image1_px_10	Grain 3; relict core		52.61	0.259	1.98	5.772	0.197	15.294	22.957	0.141	0.011	0.083		53.096	0.007	1.666	19.068	0.368	25.219	0.296	0	0.031	0.019		774.618	15.2234		774.618		885.337	839.566	15.2234	-2.09166	948.898	0.499146		0.133064		0.875603	0.00324241	0.0194192	0.0803381	0.00277709	0.379462	0.409381	0.00227497	0.000116778
AL20-26_BSE-image1_cpx_6	Grain 2; relict core	AL20-26_BSE-image1_px_1	Grain 1; Relict core		53.23	0.099	1.292	5.5	0.157	16.012	23.06	0.125	0.025	0.099		53.507	0.093	1.464	19.276	0.39	25.042	0.314	0.001	0.008	0.041		772.558	14.0984		772.558		891.694	851.573	14.0984	-2.27111	945.525	0.446241		0.140776		0.885922	0.00123938	0.0126715	0.0765522	0.00221322	0.397277	0.411217	0.00201682	0.000265404
		AL20-26_BSE-image1_px_2	Grain 1; Relict core		53.23	0.099	1.292	5.5	0.157	16.012	23.06	0.125	0.025	0.099		53.256	0.069	1.515	19.249	0.387	25.221	0.357	-0.005	0.011	0.106		772.559	13.4207		772.559		889.156	850.964	13.4207	-0.99909	939.515	0.450061		0.16014		0.885922	0.00123938	0.0126715	0.0765522	0.00221322	0.397277	0.411217	0.00201682	0.000265404
		AL20-26_BSE-image1_px_3	Grain 1; Relict core		53.23	0.099	1.292	5.5	0.157	16.012	23.06	0.125	0.025	0.099		53.201	0.124	1.399	19.049	0.436	25.213	0.469	0.01	0.025	0.119		770.481	11.2661		770.481		881.018	844.572	11.2661	0.197728	920.409	0.454642		0.210651		0.885922	0.00123938	0.0126715	0.0765522	0.00221322	0.397277	0.411217	0.00201682	0.000265404
		AL20-26_BSE-image1_px_4	Grain 1; Relict core		53.23	0.099	1.292	5.5	0.157	16.012	23.06	0.125	0.025	0.099		53.472	0.04	1.297	18.879	0.382	24.664	1.359	0.016	0.02	0.038		769.836	7.49096		769.836		888.704	842.435	7.49096	0.337172	886.931	0.448747		0.610062		0.885922	0.00123938	0.0126715	0.0765522	0.00221322	0.397277	0.411217	0.00201682	0.000265404
		AL20-26_BSE-image1_px_5	Grain 1; Relict core		53.23	0.099	1.292	5.5	0.157	16.012	23.06	0.125	0.025	0.099		53.226	0.102	1.435	19.38	0.425	24.692	0.726	0.009	0.014	0.061		765.578	9.69639		765.578		879.57	841.032	9.69639	1.65061	906.489	0.437643		0.326542		0.885922	0.00123938	0.0126715	0.0765522	0.00221322	0.397277	0.411217	0.00201682	0.000265404
		AL20-26_BSE-image1_px_6	Grain 2; relict core		53.23	0.099	1.292	5.5	0.157	16.012	23.06	0.125	0.025	0.099		53.477	0.075	1.547	18.959	0.42	25.473	0.49	0.009	0.01	0.047		771.852	11.0473		771.852		882.543	842.579	11.0473	0.862121	918.469	0.461511		0.218792		0.885922	0.00123938	0.0126715	0.0765522	0.00221322	0.397277	0.411217	0.00201682	0.000265404
		AL20-26_BSE-image1_px_7	Grain 2; relict core		53.23	0.099	1.292	5.5	0.157	16.012	23.06	0.125	0.025	0.099		53.482	0.062	1.413	18.946	0.434	25.705	0.376	0.004	0.018	0.053		775.127	12.7054		775.127		885.04	846.619	12.7054	-0.611558	933.172	0.466034		0.167904		0.885922	0.00123938	0.0126715	0.0765522	0.00221322	0.397277	0.411217	0.00201682	0.000265404
		AL20-26_BSE-image1_px_8	Grain 2; relict core		53.23	0.099	1.292	5.5	0.157	16.012	23.06	0.125	0.025	0.099		53.44	0.047	1.274	18.619	0.366	25.477	0.341	0.006	0.013	0.016		775.969	12.8148		775.969		891.214	849.248	12.8148	-1.48668	934.143	0.470012		0.153305		0.885922	0.00123938	0.0126715	0.0765522	0.00221322	0.397277	0.411217	0.00201682	0.000265404
		AL20-26_BSE-image1_px_9	Grain 3; relict core		53.23	0.099	1.292	5.5	0.157	16.012	23.06	0.125	0.025	0.099		53.241	0.036	1.467	18.97	0.343	24.989	0.707	-0.003	0.012	0.055		768.309	9.31294		768.309		884.108	842.565	9.31294	1.89301	903.088	0.452479		0.31804		0.885922	0.00123938	0.0126715	0.0765522	0.00221322	0.397277	0.411217	0.00201682	0.000265404
		AL20-26_BSE-image1_px_10	Grain 3; relict core		53.23	0.099	1.292	5.5	0.157	16.012	23.06	0.125	0.025	0.099		53.096	0.007	1.666	19.068	0.368	25.219	0.296	0	0.031	0.019		776.55	15.2172		776.55		897.858	854.277	15.2172	-2.05013	955.446	0.454297		0.133157		0.885922	0.00123938	0.0126715	0.0765522	0.00221322	0.397277	0.411217	0.00201682	0.000265404
AL20-26_BSE-image1_cpx_7	Grain 2; relict core	AL20-26_BSE-image1_px_1	Grain 1; Relict core		52.503	0.309	2.092	6.191	0.173	15.957	22.126	0.108	0.013	0.073		53.507	0.093	1.464	19.276	0.39	25.042	0.314	0.001	0.008	0.041		868.459	17.529		868.459		957.316	941.842	17.529	-3.4966	1074.65	0.504036		0.100137		0.873822	0.00386836	0.0205176	0.0861699	0.00243877	0.395912	0.394562	0.00174253	0.00013801
		AL20-26_BSE-image1_px_2	Grain 1; Relict core		52.503	0.309	2.092	6.191	0.173	15.957	22.126	0.108	0.013	0.073		53.256	0.069	1.515	19.249	0.387	25.221	0.357	-0.005	0.011	0.106		867.535	16.4365		867.535		952.506	939.483	16.4365	-1.68759	1064.19	0.508351		0.113911		0.873822	0.00386836	0.0205176	0.0861699	0.00243877	0.395912	0.394562	0.00174253	0.00013801
		AL20-26_BSE-image1_px_3	Grain 1; Relict core		52.503	0.309	2.092	6.191	0.173	15.957	22.126	0.108	0.013	0.073		53.201	0.124	1.399	19.049	0.436	25.213	0.469	0.01	0.025	0.119		863.486	13.5587		863.486		939.968	928.945	13.5587	0.429293	1036.66	0.513525		0.149841		0.873822	0.00386836	0.0205176	0.0861699	0.00243877	0.395912	0.394562	0.00174253	0.00013801
		AL20-26_BSE-image1_px_4	Grain 1; Relict core		52.503	0.309	2.092	6.191	0.173	15.957	22.126	0.108	0.013	0.073		53.472	0.04	1.297	18.879	0.382	24.664	1.359	0.016	0.02	0.038		858.223	8.28258		858.223		942.013	920.726	8.28258	2.45472	986.173	0.506867		0.43395		0.873822	0.00386836	0.0205176	0.0861699	0.00243877	0.395912	0.394562	0.00174253	0.00013801
		AL20-26_BSE-image1_px_5	Grain 1; Relict core		52.503	0.309	2.092	6.191	0.173	15.957	22.126	0.108	0.013	0.073		53.226	0.102	1.435	19.38	0.425	24.692	0.726	0.009	0.014	0.061		855.619	11.1753		855.619		934.75	921.613	11.1753	2.88379	1013.85	0.494324		0.232276		0.873822	0.00386836	0.0205176	0.0861699	0.00243877	0.395912	0.394562	0.00174253	0.00013801
		AL20-26_BSE-image1_px_6	Grain 2; relict core		52.503	0.309	2.092	6.191	0.173	15.957	22.126	0.108	0.013	0.073		53.477	0.075	1.547	18.959	0.42	25.473	0.49	0.009	0.01	0.047		864.904	13.2547		864.904		941.325	926.212	13.2547	1.21478	1033.75	0.521284		0.155632		0.873822	0.00386836	0.0205176	0.0861699	0.00243877	0.395912	0.394562	0.00174253	0.00013801
		AL20-26_BSE-image1_px_7	Grain 2; relict core		52.503	0.309	2.092	6.191	0.173	15.957	22.126	0.108	0.013	0.073		53.482	0.062	1.413	18.946	0.434	25.705	0.376	0.004	0.018	0.053		870.297	15.5817		870.297		947.158	933.655	15.5817	-1.09682	1056.01	0.526392		0.119434		0.873822	0.00386836	0.0205176	0.0861699	0.00243877	0.395912	0.394562	0.00174253	0.00013801
		AL20-26_BSE-image1_px_8	Grain 2; relict core		52.503	0.309	2.092	6.191	0.173	15.957	22.126	0.108	0.013	0.073		53.44	0.047	1.274	18.619	0.366	25.477	0.341	0.006	0.013	0.016		871.945	15.965		871.945		955.481	937.913	15.965	-2.31777	1059.68	0.530886		0.109049		0.873822	0.00386836	0.0205176	0.0861699	0.00243877	0.395912	0.394562	0.00174253	0.00013801
		AL20-26_BSE-image1_px_9	Grain 3; relict core		52.503	0.309	2.092	6.191	0.173	15.957	22.126	0.108	0.013	0.073		53.241	0.036	1.467	18.97	0.343	24.989	0.707	-0.003	0.012	0.055		858.984	10.8314		858.984		940.052	923.602	10.8314	3.09957	1010.56	0.511083		0.226229		0.873822	0.00386836	0.0205176	0.0861699	0.00243877	0.395912	0.394562	0.00174253	0.00013801
		AL20-26_BSE-image1_px_10	Grain 3; relict core		52.503	0.309	2.092	6.191	0.173	15.957	22.126	0.108	0.013	0.073		53.096	0.007	1.666	19.068	0.368	25.219	0.296	0	0.031	0.019		873.54	18.844		873.54		965.338	945.923	18.844	-3.50049	1087.23	0.513136		0.0947175		0.873822	0.00386836	0.0205176	0.0861699	0.00243877	0.395912	0.394562	0.00174253	0.00013801
AL20-26_BSE-image1_cpx_8	Grain 2; relict core	AL20-26_BSE-image1_px_1	Grain 1; Relict core		52.63	0.277	2.013	5.887	0.149	15.669	22.986	0.1	0.02	0.055		53.507	0.093	1.464	19.276	0.39	25.042	0.314	0.001	0.008	0.041		786.775	14.3755		786.775		901.801	866.26	14.3755	-2.72261	959.124	0.488096		0.136309		0.875936	0.00346775	0.0197428	0.0819387	0.00210044	0.388766	0.409898	0.00161345	0.000212323
		AL20-26_BSE-image1_px_2	Grain 1; Relict core		52.63	0.277	2.013	5.887	0.149	15.669	22.986	0.1	0.02	0.055		53.256	0.069	1.515	19.249	0.387	25.221	0.357	-0.005	0.011	0.106		786.671	13.6643		786.671		899.07	865.519	13.6643	-1.40862	952.76	0.492274		0.155058		0.875936	0.00346775	0.0197428	0.0819387	0.00210044	0.388766	0.409898	0.00161345	0.000212323
		AL20-26_BSE-image1_px_3	Grain 1; Relict core		52.63	0.277	2.013	5.887	0.149	15.669	22.986	0.1	0.02	0.055		53.201	0.124	1.399	19.049	0.436	25.213	0.469	0.01	0.025	0.119		784.305	11.4512		784.305		890.518	858.719	11.4512	-0.143293	932.956	0.497285		0.203966		0.875936	0.00346775	0.0197428	0.0819387	0.00210044	0.388766	0.409898	0.00161345	0.000212323
		AL20-26_BSE-image1_px_4	Grain 1; Relict core		52.63	0.277	2.013	5.887	0.149	15.669	22.986	0.1	0.02	0.055		53.472	0.04	1.297	18.879	0.382	24.664	1.359	0.016	0.02	0.038		783.043	7.55488		783.043		897.882	856.118	7.55488	0.137453	898.089	0.490837		0.590702		0.875936	0.00346775	0.0197428	0.0819387	0.00210044	0.388766	0.409898	0.00161345	0.000212323
		AL20-26_BSE-image1_px_5	Grain 1; Relict core		52.63	0.277	2.013	5.887	0.149	15.669	22.986	0.1	0.02	0.055		53.226	0.102	1.435	19.38	0.425	24.692	0.726	0.009	0.014	0.061		779.023	9.81582		779.023		888.779	854.848	9.81582	1.38415	918.321	0.478691		0.316179		0.875936	0.00346775	0.0197428	0.0819387	0.00210044	0.388766	0.409898	0.00161345	0.000212323
		AL20-26_BSE-image1_px_6	Grain 2; relict core		52.63	0.277	2.013	5.887	0.149	15.669	22.986	0.1	0.02	0.055		53.477	0.075	1.547	18.959	0.42	25.473	0.49	0.009	0.01	0.047		785.684	11.2256		785.684		892.049	856.636	11.2256	0.53106	930.937	0.504798		0.211849		0.875936	0.00346775	0.0197428	0.0819387	0.00210044	0.388766	0.409898	0.00161345	0.000212323
		AL20-26_BSE-image1_px_7	Grain 2; relict core		52.63	0.277	2.013	5.887	0.149	15.669	22.986	0.1	0.02	0.055		53.482	0.062	1.413	18.946	0.434	25.705	0.376	0.004	0.018	0.053		789.248	12.9376		789.248		894.816	860.989	12.9376	-1.00496	946.258	0.509745		0.162576		0.875936	0.00346775	0.0197428	0.0819387	0.00210044	0.388766	0.409898	0.00161345	0.000212323
		AL20-26_BSE-image1_px_8	Grain 2; relict core		52.63	0.277	2.013	5.887	0.149	15.669	22.986	0.1	0.02	0.055		53.44	0.047	1.274	18.619	0.366	25.477	0.341	0.006	0.013	0.016		790.169	13.0692		790.169		901.218	863.781	13.0692	-1.90741	947.435	0.514097		0.14844		0.875936	0.00346775	0.0197428	0.0819387	0.00210044	0.388766	0.409898	0.00161345	0.000212323
		AL20-26_BSE-image1_px_9	Grain 3; relict core		52.63	0.277	2.013	5.887	0.149	15.669	22.986	0.1	0.02	0.055		53.241	0.036	1.467	18.97	0.343	24.989	0.707	-0.003	0.012	0.055		781.816	9.43557		781.816		893.426	856.442	9.43557	1.62492	914.918	0.494919		0.307947		0.875936	0.00346775	0.0197428	0.0819387	0.00210044	0.388766	0.409898	0.00161345	0.000212323
		AL20-26_BSE-image1_px_10	Grain 3; relict core		52.63	0.277	2.013	5.887	0.149	15.669	22.986	0.1	0.02	0.055		53.096	0.007	1.666	19.068	0.368	25.219	0.296	0	0.031	0.019		790.955	15.5101		790.955		908.171	869.111	15.5101	-2.51536	969.278	0.496907		0.128931		0.875936	0.00346775	0.0197428	0.0819387	0.00210044	0.388766	0.409898	0.00161345	0.000212323
AL20-26_BSE-image1_cpx_9	Grain 2; relict core	AL20-26_BSE-image1_px_1	Grain 1; Relict core		52.864	0.245	2.264	5.473	0.14	15.559	23.409	0.123	0.021	0.084		53.507	0.093	1.464	19.276	0.39	25.042	0.314	0.001	0.008	0.041		744.093	13.2273		744.093		871.08	828.076	13.2273	-2.86278	901.525	0.456979		0.156951		0.879831	0.00306715	0.0222046	0.0761764	0.00197357	0.386037	0.417441	0.00198455	0.000222939
		AL20-26_BSE-image1_px_2	Grain 1; Relict core		52.864	0.245	2.264	5.473	0.14	15.559	23.409	0.123	0.021	0.084		53.256	0.069	1.515	19.249	0.387	25.221	0.357	-0.005	0.011	0.106		744.268	12.6549		744.268		869.055	827.818	12.6549	-1.72993	896.602	0.460891		0.178539		0.879831	0.00306715	0.0222046	0.0761764	0.00197357	0.386037	0.417441	0.00198455	0.000222939
		AL20-26_BSE-image1_px_3	Grain 1; Relict core		52.864	0.245	2.264	5.473	0.14	15.559	23.409	0.123	0.021	0.084		53.201	0.124	1.399	19.049	0.436	25.213	0.469	0.01	0.025	0.119		742.549	10.6839		742.549		861.961	822.314	10.6839	-0.773089	879.647	0.465582		0.234854		0.879831	0.00306715	0.0222046	0.0761764	0.00197357	0.386037	0.417441	0.00198455	0.000222939
		AL20-26_BSE-image1_px_4	Grain 1; Relict core		52.864	0.245	2.264	5.473	0.14	15.559	23.409	0.123	0.021	0.084		53.472	0.04	1.297	18.879	0.382	24.664	1.359	0.016	0.02	0.038		742.789	7.28993		742.789		870.759	821.418	7.28993	-1.12554	850.451	0.459545		0.680155		0.879831	0.00306715	0.0222046	0.0761764	0.00197357	0.386037	0.417441	0.00198455	0.000222939
		AL20-26_BSE-image1_px_5	Grain 1; Relict core		52.864	0.245	2.264	5.473	0.14	15.559	23.409	0.123	0.021	0.084		53.226	0.102	1.435	19.38	0.425	24.692	0.726	0.009	0.014	0.061		738.296	9.32083		738.296		861.34	819.568	9.32083	0.420795	867.921	0.448174		0.36406		0.879831	0.00306715	0.0222046	0.0761764	0.00197357	0.386037	0.417441	0.00198455	0.000222939
		AL20-26_BSE-image1_px_6	Grain 2; relict core		52.864	0.245	2.264	5.473	0.14	15.559	23.409	0.123	0.021	0.084		53.477	0.075	1.547	18.959	0.42	25.473	0.49	0.009	0.01	0.047		743.883	10.4868		743.883		863.501	820.489	10.4868	-0.140584	877.952	0.472616		0.243931		0.879831	0.00306715	0.0222046	0.0761764	0.00197357	0.386037	0.417441	0.00198455	0.000222939
		AL20-26_BSE-image1_px_7	Grain 2; relict core		52.864	0.245	2.264	5.473	0.14	15.559	23.409	0.123	0.021	0.084		53.482	0.062	1.413	18.946	0.434	25.705	0.376	0.004	0.018	0.053		746.727	11.975		746.727		865.255	823.812	11.975	-1.39667	890.753	0.477248		0.187196		0.879831	0.00306715	0.0222046	0.0761764	0.00197357	0.386037	0.417441	0.00198455	0.000222939
		AL20-26_BSE-image1_px_8	Grain 2; relict core		52.864	0.245	2.264	5.473	0.14	15.559	23.409	0.123	0.021	0.084		53.44	0.047	1.274	18.619	0.366	25.477	0.341	0.006	0.013	0.016		747.386	12.0149		747.386		870.891	826.092	12.0149	-2.18304	891.096	0.481322		0.170919		0.879831	0.00306715	0.0222046	0.0761764	0.00197357	0.386037	0.417441	0.00198455	0.000222939
		AL20-26_BSE-image1_px_9	Grain 3; relict core		52.864	0.245	2.264	5.473	0.14	15.559	23.409	0.123	0.021	0.084		53.241	0.036	1.467	18.97	0.343	24.989	0.707	-0.003	0.012	0.055		740.833	8.92734		740.833		865.654	820.994	8.92734	0.668488	864.537	0.463367		0.354581		0.879831	0.00306715	0.0222046	0.0761764	0.00197357	0.386037	0.417441	0.00198455	0.000222939
		AL20-26_BSE-image1_px_10	Grain 3; relict core		52.864	0.245	2.264	5.473	0.14	15.559	23.409	0.123	0.021	0.084		53.096	0.007	1.666	19.068	0.368	25.219	0.296	0	0.031	0.019		747.851	14.2962		747.851		876.769	830.482	14.2962	-2.58283	910.72	0.465229		0.148456		0.879831	0.00306715	0.0222046	0.0761764	0.00197357	0.386037	0.417441	0.00198455	0.000222939
AL20-26_BSE-image2_cpx_1	Grain 1; Relict core	AL20-26_BSE-image2_pyroxene_1	Grain 1; Relict core		52.856	0.197	2.201	6.14	0.223	15.453	23.242	0.139	0.012	0.039		53.34	0.016	1.679	18.589	0.397	25.393	0.3	-0.001	0.021	0.054		770.238	14.0068		770.238		890.094	845.876	14.0068	-2.9114	930.131	0.542767		0.138016		0.879697	0.00246624	0.0215867	0.0854601	0.00314361	0.383407	0.414463	0.0022427	0.000127394
		AL20-26_BSE-image2_pyroxene_2	Grain 1; Relict core		52.856	0.197	2.201	6.14	0.223	15.453	23.242	0.139	0.012	0.039		53.77	0.02	1.469	18.443	0.402	25.862	0.291	0.008	0.006	0.13		773.302	14.186		773.302		892.117	848.879	14.186	-3.63604	931.702	0.557168		0.132937		0.879697	0.00246624	0.0215867	0.0854601	0.00314361	0.383407	0.414463	0.0022427	0.000127394
		AL20-26_BSE-image2_pyroxene_3	Grain 1; Relict core		52.856	0.197	2.201	6.14	0.223	15.453	23.242	0.139	0.012	0.039		53.798	0.06	1.384	18.005	0.392	26.093	0.34	0.002	0.017	0.107		772.043	11.6725		772.043		884.296	842.313	11.6725	-2.61857	909.68	0.57582		0.155358		0.879697	0.00246624	0.0215867	0.0854601	0.00314361	0.383407	0.414463	0.0022427	0.000127394
		AL20-26_BSE-image2_pyroxene_4	Grain 1; Relict core		52.856	0.197	2.201	6.14	0.223	15.453	23.242	0.139	0.012	0.039		53.934	0.011	1.393	17.979	0.385	26.214	0.268	0.002	0.018	0.139		777.053	14.1069		777.053		893.313	849.527	14.1069	-4.70296	931.009	0.579326		0.122215		0.879697	0.00246624	0.0215867	0.0854601	0.00314361	0.383407	0.414463	0.0022427	0.000127394
		AL20-26_BSE-image2_pyroxene_5	Grain 1; Relict core		52.856	0.197	2.201	6.14	0.223	15.453	23.242	0.139	0.012	0.039		53.814	0.073	1.388	18.438	0.45	25.434	0.608	0	0	0.088		763.19	8.72501		763.19		871.763	832.189	8.72501	0.293765	883.855	0.548096		0.278256		0.879697	0.00246624	0.0215867	0.0854601	0.00314361	0.383407	0.414463	0.0022427	0.000127394
		AL20-26_BSE-image2_pyroxene_7	Grain 2; relict core		52.856	0.197	2.201	6.14	0.223	15.453	23.242	0.139	0.012	0.039		53.528	0.069	1.504	18.165	0.447	25.515	0.541	-0.001	0.015	0.159		765.438	9.17399		765.438		872.819	833.712	9.17399	-0.0851899	887.789	0.558105		0.24829		0.879697	0.00246624	0.0215867	0.0854601	0.00314361	0.383407	0.414463	0.0022427	0.000127394
		AL20-26_BSE-image2_pyroxene_8	Grain 2; relict core		52.856	0.197	2.201	6.14	0.223	15.453	23.242	0.139	0.012	0.039		53.607	0.089	1.531	18.288	0.388	25.633	0.432	-0.011	-0.002	0.098		765.861	9.97484		765.861		877.272	837.01	9.97484	-0.996838	894.805	0.556915		0.197957		0.879697	0.00246624	0.0215867	0.0854601	0.00314361	0.383407	0.414463	0.0022427	0.000127394
		AL20-26_BSE-image2_pyroxene_9	Grain 2; relict core		52.856	0.197	2.201	6.14	0.223	15.453	23.242	0.139	0.012	0.039		53.989	0.12	1.407	18.056	0.447	25.733	0.619	-0.007	0.011	0.085		764.131	7.47342		764.131		867.861	828.933	7.47342	-0.0760416	872.889	0.566271		0.282285		0.879697	0.00246624	0.0215867	0.0854601	0.00314361	0.383407	0.414463	0.0022427	0.000127394
		AL20-26_BSE-image2_pyroxene_10	Grain 2; relict core 2		52.856	0.197	2.201	6.14	0.223	15.453	23.242	0.139	0.012	0.039		53.747	0.045	1.501	17.412	0.42	26.125	0.657	-0.007	0.006	0.062		769.176	7.13805		769.176		870.931	828.246	7.13805	0.542334	869.95	0.596161		0.300337		0.879697	0.00246624	0.0215867	0.0854601	0.00314361	0.383407	0.414463	0.0022427	0.000127394
		AL20-26_BSE-image2_pyroxene_11	Grain 2; relict core 2		52.856	0.197	2.201	6.14	0.223	15.453	23.242	0.139	0.012	0.039		53.807	0.062	1.424	18.035	0.365	25.801	0.373	0.005	0.016	0.065		769.44	10.9215		769.44		884.502	840.479	10.9215	-1.90314	903.1	0.568429		0.170803		0.879697	0.00246624	0.0215867	0.0854601	0.00314361	0.383407	0.414463	0.0022427	0.000127394
AL20-26_BSE-image2_cpx_2	Grain 1; Relict core	AL20-26_BSE-image2_pyroxene_1	Grain 1; Relict core		52.977	0.173	2.102	6.226	0.168	15.351	22.954	0.149	0.02	0.096		53.34	0.016	1.679	18.589	0.397	25.393	0.3	-0.001	0.021	0.054		798.111	14.972		798.111		899.79	857.936	14.972	-2.64902	966.633	0.554026		0.124121		0.881711	0.00216578	0.0206157	0.0866571	0.00236828	0.380877	0.409327	0.00240404	0.000212323
		AL20-26_BSE-image2_pyroxene_2	Grain 1; Relict core		52.977	0.173	2.102	6.226	0.168	15.351	22.954	0.149	0.02	0.096		53.77	0.02	1.469	18.443	0.402	25.862	0.291	0.008	0.006	0.13		801.41	15.1881		801.41		902.007	861.146	15.1881	-3.41452	968.571	0.568726		0.119554		0.881711	0.00216578	0.0206157	0.0866571	0.00236828	0.380877	0.409327	0.00240404	0.000212323
		AL20-26_BSE-image2_pyroxene_3	Grain 1; Relict core		52.977	0.173	2.102	6.226	0.168	15.351	22.954	0.149	0.02	0.096		53.798	0.06	1.384	18.005	0.392	26.093	0.34	0.002	0.017	0.107		799.856	12.53		799.856		893.435	853.925	12.53	-2.2086	944.742	0.587764		0.139717		0.881711	0.00216578	0.0206157	0.0866571	0.00236828	0.380877	0.409327	0.00240404	0.000212323
		AL20-26_BSE-image2_pyroxene_4	Grain 1; Relict core		52.977	0.173	2.102	6.226	0.168	15.351	22.954	0.149	0.02	0.096		53.934	0.011	1.393	17.979	0.385	26.214	0.268	0.002	0.018	0.139		805.558	15.1969		805.558		903.588	862.099	15.1969	-4.58624	968.65	0.591344		0.109911		0.881711	0.00216578	0.0206157	0.0866571	0.00236828	0.380877	0.409327	0.00240404	0.000212323
		AL20-26_BSE-image2_pyroxene_5	Grain 1; Relict core		52.977	0.173	2.102	6.226	0.168	15.351	22.954	0.149	0.02	0.096		53.814	0.073	1.388	18.438	0.45	25.434	0.608	0	0	0.088		789.741	9.20377		789.741		879.177	842.337	9.20377	1.17525	914.924	0.559465		0.250242		0.881711	0.00216578	0.0206157	0.0866571	0.00236828	0.380877	0.409327	0.00240404	0.000212323
		AL20-26_BSE-image2_pyroxene_7	Grain 2; relict core		52.977	0.173	2.102	6.226	0.168	15.351	22.954	0.149	0.02	0.096		53.528	0.069	1.504	18.165	0.447	25.515	0.541	-0.001	0.015	0.159		792.237	9.71053		792.237		880.475	844.079	9.71053	0.726858	919.467	0.569682		0.223293		0.881711	0.00216578	0.0206157	0.0866571	0.00236828	0.380877	0.409327	0.00240404	0.000212323
		AL20-26_BSE-image2_pyroxene_8	Grain 2; relict core		52.977	0.173	2.102	6.226	0.168	15.351	22.954	0.149	0.02	0.096		53.607	0.089	1.531	18.288	0.388	25.633	0.432	-0.011	-0.002	0.098		792.988	10.6478		792.988		885.541	847.891	10.6478	-0.360324	927.869	0.568468		0.178028		0.881711	0.00216578	0.0206157	0.0866571	0.00236828	0.380877	0.409327	0.00240404	0.000212323
		AL20-26_BSE-image2_pyroxene_9	Grain 2; relict core		52.977	0.173	2.102	6.226	0.168	15.351	22.954	0.149	0.02	0.096		53.989	0.12	1.407	18.056	0.447	25.733	0.619	-0.007	0.011	0.085		790.758	7.94535		790.758		875.182	838.981	7.94535	0.818399	903.643	0.578018		0.253866		0.881711	0.00216578	0.0206157	0.0866571	0.00236828	0.380877	0.409327	0.00240404	0.000212323
		AL20-26_BSE-image2_pyroxene_10	Grain 2; relict core 2		52.977	0.173	2.102	6.226	0.168	15.351	22.954	0.149	0.02	0.096		53.747	0.045	1.501	17.412	0.42	26.125	0.657	-0.007	0.006	0.062		795.995	7.58161		795.995		878.195	838.19	7.58161	1.48499	900.383	0.608527		0.2701		0.881711	0.00216578	0.0206157	0.0866571	0.00236828	0.380877	0.409327	0.00240404	0.000212323
		AL20-26_BSE-image2_pyroxene_11	Grain 2; relict core 2		52.977	0.173	2.102	6.226	0.168	15.351	22.954	0.149	0.02	0.096		53.807	0.062	1.424	18.035	0.365	25.801	0.373	0.005	0.016	0.065		796.968	11.7015		796.968		893.335	851.792	11.7015	-1.39784	937.315	0.58022		0.153607		0.881711	0.00216578	0.0206157	0.0866571	0.00236828	0.380877	0.409327	0.00240404	0.000212323
AL20-26_BSE-image2_cpx_3	Grain 1; Relict core	AL20-26_BSE-image2_pyroxene_1	Grain 1; Relict core		53.043	0.176	2.028	6.067	0.188	15.395	23.217	0.161	0.003	0.066		53.34	0.016	1.679	18.589	0.397	25.393	0.3	-0.001	0.021	0.054		766.707	14.0384		766.707		882.746	835.966	14.0384	-2.70561	928.365	0.538335		0.137511		0.88281	0.00220334	0.01989	0.084444	0.00265022	0.381968	0.414017	0.00259766	3.18485e-05
		AL20-26_BSE-image2_pyroxene_2	Grain 1; Relict core		53.043	0.176	2.028	6.067	0.188	15.395	23.217	0.161	0.003	0.066		53.77	0.02	1.469	18.443	0.402	25.862	0.291	0.008	0.006	0.13		769.753	14.2189		769.753		884.739	838.903	14.2189	-3.43279	929.943	0.552618		0.132451		0.88281	0.00220334	0.01989	0.084444	0.00265022	0.381968	0.414017	0.00259766	3.18485e-05
		AL20-26_BSE-image2_pyroxene_3	Grain 1; Relict core		53.043	0.176	2.028	6.067	0.188	15.395	23.217	0.161	0.003	0.066		53.798	0.06	1.384	18.005	0.392	26.093	0.34	0.002	0.017	0.107		768.495	11.7006		768.495		877.029	832.475	11.7006	-2.40868	907.917	0.571117		0.154789		0.88281	0.00220334	0.01989	0.084444	0.00265022	0.381968	0.414017	0.00259766	3.18485e-05
		AL20-26_BSE-image2_pyroxene_4	Grain 1; Relict core		53.043	0.176	2.028	6.067	0.188	15.395	23.217	0.161	0.003	0.066		53.934	0.011	1.393	17.979	0.385	26.214	0.268	0.002	0.018	0.139		773.483	14.1427		773.483		885.927	839.544	14.1427	-4.50467	929.277	0.574595		0.121768		0.88281	0.00220334	0.01989	0.084444	0.00265022	0.381968	0.414017	0.00259766	3.18485e-05
		AL20-26_BSE-image2_pyroxene_5	Grain 1; Relict core		53.043	0.176	2.028	6.067	0.188	15.395	23.217	0.161	0.003	0.066		53.814	0.073	1.388	18.438	0.45	25.434	0.608	0	0	0.088		759.689	8.74073		759.689		864.653	822.547	8.74073	0.523146	882.027	0.54362		0.277238		0.88281	0.00220334	0.01989	0.084444	0.00265022	0.381968	0.414017	0.00259766	3.18485e-05
		AL20-26_BSE-image2_pyroxene_7	Grain 2; relict core		53.043	0.176	2.028	6.067	0.188	15.395	23.217	0.161	0.003	0.066		53.528	0.069	1.504	18.165	0.447	25.515	0.541	-0.001	0.015	0.159		761.922	9.1916		761.922		865.699	824.041	9.1916	0.140887	885.971	0.553547		0.247381		0.88281	0.00220334	0.01989	0.084444	0.00265022	0.381968	0.414017	0.00259766	3.18485e-05
		AL20-26_BSE-image2_pyroxene_8	Grain 2; relict core		53.043	0.176	2.028	6.067	0.188	15.395	23.217	0.161	0.003	0.066		53.607	0.089	1.531	18.288	0.388	25.633	0.432	-0.011	-0.002	0.098		762.346	9.99693		762.346		870.096	827.276	9.99693	-0.776978	893.015	0.552367		0.197233		0.88281	0.00220334	0.01989	0.084444	0.00265022	0.381968	0.414017	0.00259766	3.18485e-05
		AL20-26_BSE-image2_pyroxene_9	Grain 2; relict core		53.043	0.176	2.028	6.067	0.188	15.395	23.217	0.161	0.003	0.066		53.989	0.12	1.407	18.056	0.447	25.733	0.619	-0.007	0.011	0.085		760.623	7.48891		760.623		860.813	819.366	7.48891	0.153348	871.078	0.561647		0.281252		0.88281	0.00220334	0.01989	0.084444	0.00265022	0.381968	0.414017	0.00259766	3.18485e-05
		AL20-26_BSE-image2_pyroxene_10	Grain 2; relict core 2		53.043	0.176	2.028	6.067	0.188	15.395	23.217	0.161	0.003	0.066		53.747	0.045	1.501	17.412	0.42	26.125	0.657	-0.007	0.006	0.062		765.634	7.15261		765.634		863.83	818.692	7.15261	0.771494	868.136	0.591292		0.299237		0.88281	0.00220334	0.01989	0.084444	0.00265022	0.381968	0.414017	0.00259766	3.18485e-05
		AL20-26_BSE-image2_pyroxene_11	Grain 2; relict core 2		53.043	0.176	2.028	6.067	0.188	15.395	23.217	0.161	0.003	0.066		53.807	0.062	1.424	18.035	0.365	25.801	0.373	0.005	0.016	0.065		765.906	10.9471		765.906		877.221	830.675	10.9471	-1.68907	901.326	0.563787		0.170178		0.88281	0.00220334	0.01989	0.084444	0.00265022	0.381968	0.414017	0.00259766	3.18485e-05
AL20-26_BSE-image2_cpx_4	Grain 1; Relict core	AL20-26_BSE-image2_pyroxene_1	Grain 1; Relict core		53.223	0.198	1.876	7.222	0.209	16.544	20.947	0.114	0.011	0.093		53.34	0.016	1.679	18.589	0.397	25.393	0.3	-0.001	0.021	0.054		977.453	23.2684		977.453		1040.29	1041	23.2684	-6.51232	1233.78	0.596314		0.0665407		0.885805	0.00247876	0.0183992	0.10052	0.00294626	0.410476	0.373537	0.00183934	0.000116778
		AL20-26_BSE-image2_pyroxene_2	Grain 1; Relict core		53.223	0.198	1.876	7.222	0.209	16.544	20.947	0.114	0.011	0.093		53.77	0.02	1.469	18.443	0.402	25.862	0.291	0.008	0.006	0.13		982.635	23.8014		982.635		1044.98	1047.26	23.8014	-7.63523	1239.26	0.612135		0.0640923		0.885805	0.00247876	0.0183992	0.10052	0.00294626	0.410476	0.373537	0.00183934	0.000116778
		AL20-26_BSE-image2_pyroxene_3	Grain 1; Relict core		53.223	0.198	1.876	7.222	0.209	16.544	20.947	0.114	0.011	0.093		53.798	0.06	1.384	18.005	0.392	26.093	0.34	0.002	0.017	0.107		978.147	19.9002		978.147		1026.9	1030.75	19.9002	-4.82737	1199.16	0.632627		0.0749017		0.885805	0.00247876	0.0183992	0.10052	0.00294626	0.410476	0.373537	0.00183934	0.000116778
		AL20-26_BSE-image2_pyroxene_4	Grain 1; Relict core		53.223	0.198	1.876	7.222	0.209	16.544	20.947	0.114	0.011	0.093		53.934	0.011	1.393	17.979	0.385	26.214	0.268	0.002	0.018	0.139		990.188	24.5659		990.188		1051.27	1052.34	24.5659	-9.70781	1247.12	0.63648		0.0589229		0.885805	0.00247876	0.0183992	0.10052	0.00294626	0.410476	0.373537	0.00183934	0.000116778
		AL20-26_BSE-image2_pyroxene_5	Grain 1; Relict core		53.223	0.198	1.876	7.222	0.209	16.544	20.947	0.114	0.011	0.093		53.814	0.073	1.388	18.438	0.45	25.434	0.608	0	0	0.088		956.607	13.3188		956.607		991.835	999.404	13.3188	2.58333	1131.5	0.602168		0.134154		0.885805	0.00247876	0.0183992	0.10052	0.00294626	0.410476	0.373537	0.00183934	0.000116778
		AL20-26_BSE-image2_pyroxene_7	Grain 2; relict core		53.223	0.198	1.876	7.222	0.209	16.544	20.947	0.114	0.011	0.093		53.528	0.069	1.504	18.165	0.447	25.515	0.541	-0.001	0.015	0.159		961.239	14.3222		961.239		995.944	1004.05	14.3222	1.53824	1141.82	0.613165		0.119706		0.885805	0.00247876	0.0183992	0.10052	0.00294626	0.410476	0.373537	0.00183934	0.000116778
		AL20-26_BSE-image2_pyroxene_8	Grain 2; relict core		53.223	0.198	1.876	7.222	0.209	16.544	20.947	0.114	0.011	0.093		53.607	0.089	1.531	18.288	0.388	25.633	0.432	-0.011	-0.002	0.098		965.273	16.432		965.273		1008.36	1014.74	16.432	-1.03689	1163.5	0.611857		0.0954399		0.885805	0.00247876	0.0183992	0.10052	0.00294626	0.410476	0.373537	0.00183934	0.000116778
		AL20-26_BSE-image2_pyroxene_9	Grain 2; relict core		53.223	0.198	1.876	7.222	0.209	16.544	20.947	0.114	0.011	0.093		53.989	0.12	1.407	18.056	0.447	25.733	0.619	-0.007	0.011	0.085		958.172	12.0016		958.172		986.468	994.427	12.0016	2.33306	1117.96	0.622137		0.136096		0.885805	0.00247876	0.0183992	0.10052	0.00294626	0.410476	0.373537	0.00183934	0.000116778
		AL20-26_BSE-image2_pyroxene_10	Grain 2; relict core 2		53.223	0.198	1.876	7.222	0.209	16.544	20.947	0.114	0.011	0.093		53.747	0.045	1.501	17.412	0.42	26.125	0.657	-0.007	0.006	0.062		964.488	11.3941		964.488		989.103	992.258	11.3941	3.3883	1111.72	0.654975		0.144799		0.885805	0.00247876	0.0183992	0.10052	0.00294626	0.410476	0.373537	0.00183934	0.000116778
		AL20-26_BSE-image2_pyroxene_11	Grain 2; relict core 2		53.223	0.198	1.876	7.222	0.209	16.544	20.947	0.114	0.011	0.093		53.807	0.062	1.424	18.035	0.365	25.801	0.373	0.005	0.016	0.065		972.76	18.4053		972.76		1023.27	1024.56	18.4053	-3.19937	1183.79	0.624507		0.0823481		0.885805	0.00247876	0.0183992	0.10052	0.00294626	0.410476	0.373537	0.00183934	0.000116778
AL20-26_BSE-image2_cpx_5	Grain 1; Relict core	AL20-26_BSE-image2_pyroxene_1	Grain 1; Relict core		53.04	0.189	2.16	7.268	0.207	16.567	21.149	0.13	0.012	0.088		53.34	0.016	1.679	18.589	0.397	25.393	0.3	-0.001	0.021	0.054		967.037	22.6813		967.037		1038.58	1037.42	22.6813	-6.68778	1214.88	0.599279		0.068799		0.88276	0.00236608	0.0211846	0.10116	0.00291806	0.411047	0.377139	0.00209749	0.000127394
		AL20-26_BSE-image2_pyroxene_2	Grain 1; Relict core		53.04	0.189	2.16	7.268	0.207	16.567	21.149	0.13	0.012	0.088		53.77	0.02	1.469	18.443	0.402	25.862	0.291	0.008	0.006	0.13		972.093	23.192		972.093		1043.13	1043.53	23.192	-7.78503	1220.09	0.615179		0.0662675		0.88276	0.00236608	0.0211846	0.10116	0.00291806	0.411047	0.377139	0.00209749	0.000127394
		AL20-26_BSE-image2_pyroxene_3	Grain 1; Relict core		53.04	0.189	2.16	7.268	0.207	16.567	21.149	0.13	0.012	0.088		53.798	0.06	1.384	18.005	0.392	26.093	0.34	0.002	0.017	0.107		967.805	19.3787		967.805		1025.57	1027.55	19.3787	-5.09089	1181.22	0.635773		0.0774438		0.88276	0.00236608	0.0211846	0.10116	0.00291806	0.411047	0.377139	0.00209749	0.000127394
		AL20-26_BSE-image2_pyroxene_4	Grain 1; Relict core		53.04	0.189	2.16	7.268	0.207	16.567	21.149	0.13	0.012	0.088		53.934	0.011	1.393	17.979	0.385	26.214	0.268	0.002	0.018	0.139		979.409	23.903		979.409		1049.1	1048.31	23.903	-9.79371	1227.33	0.639645		0.0609227		0.88276	0.00236608	0.0211846	0.10116	0.00291806	0.411047	0.377139	0.00209749	0.000127394
		AL20-26_BSE-image2_pyroxene_5	Grain 1; Relict core		53.04	0.189	2.16	7.268	0.207	16.567	21.149	0.13	0.012	0.088		53.814	0.073	1.388	18.438	0.45	25.434	0.608	0	0	0.088		947.059	13.0276		947.059		991.73	997.395	13.0276	2.03423	1116.5	0.605162		0.138707		0.88276	0.00236608	0.0211846	0.10116	0.00291806	0.411047	0.377139	0.00209749	0.000127394
		AL20-26_BSE-image2_pyroxene_7	Grain 2; relict core		53.04	0.189	2.16	7.268	0.207	16.567	21.149	0.13	0.012	0.088		53.528	0.069	1.504	18.165	0.447	25.515	0.541	-0.001	0.015	0.159		951.545	13.9959		951.545		995.664	1001.87	13.9959	1.0316	1126.36	0.616214		0.123769		0.88276	0.00236608	0.0211846	0.10116	0.00291806	0.411047	0.377139	0.00209749	0.000127394
		AL20-26_BSE-image2_pyroxene_8	Grain 2; relict core		53.04	0.189	2.16	7.268	0.207	16.567	21.149	0.13	0.012	0.088		53.607	0.089	1.531	18.288	0.388	25.633	0.432	-0.011	-0.002	0.098		955.341	16.0227		955.341		1007.65	1012.13	16.0227	-1.43853	1147.02	0.6149		0.0986791		0.88276	0.00236608	0.0211846	0.10116	0.00291806	0.411047	0.377139	0.00209749	0.000127394
		AL20-26_BSE-image2_pyroxene_9	Grain 2; relict core		53.04	0.189	2.16	7.268	0.207	16.567	21.149	0.13	0.012	0.088		53.989	0.12	1.407	18.056	0.447	25.733	0.619	-0.007	0.011	0.085		948.581	11.7146		948.581		986.384	992.456	11.7146	1.77621	1103.11	0.62523		0.140715		0.88276	0.00236608	0.0211846	0.10116	0.00291806	0.411047	0.377139	0.00209749	0.000127394
		AL20-26_BSE-image2_pyroxene_10	Grain 2; relict core 2		53.04	0.189	2.16	7.268	0.207	16.567	21.149	0.13	0.012	0.088		53.747	0.045	1.501	17.412	0.42	26.125	0.657	-0.007	0.006	0.062		954.838	11.1243		954.838		989.103	990.37	11.1243	2.80476	1097.1	0.658232		0.149714		0.88276	0.00236608	0.0211846	0.10116	0.00291806	0.411047	0.377139	0.00209749	0.000127394
		AL20-26_BSE-image2_pyroxene_11	Grain 2; relict core 2		53.04	0.189	2.16	7.268	0.207	16.567	21.149	0.13	0.012	0.088		53.807	0.062	1.424	18.035	0.365	25.801	0.373	0.005	0.016	0.065		962.588	17.9309		962.588		1022.2	1021.61	17.9309	-3.52102	1166.47	0.627612		0.0851429		0.88276	0.00236608	0.0211846	0.10116	0.00291806	0.411047	0.377139	0.00209749	0.000127394
AL20-26_BSE-image2_cpx_6	Grain 1; Relict core	AL20-26_BSE-image2_pyroxene_1	Grain 1; Relict core		53.154	0.197	2.236	5.706	0.16	15.723	23.187	0.138	0.017	0.086		53.34	0.016	1.679	18.589	0.397	25.393	0.3	-0.001	0.021	0.054		787.541	14.5872		787.541		896.481	858.482	14.5872	-2.83131	954.27	0.49574		0.12931		0.884657	0.00246624	0.02193	0.0794194	0.00225551	0.390106	0.413482	0.00222656	0.000180475
		AL20-26_BSE-image2_pyroxene_2	Grain 1; Relict core		53.154	0.197	2.236	5.706	0.16	15.723	23.187	0.138	0.017	0.086		53.77	0.02	1.469	18.443	0.402	25.862	0.291	0.008	0.006	0.13		790.735	14.7887		790.735		898.622	861.648	14.7887	-3.58101	956.063	0.508893		0.124552		0.884657	0.00246624	0.02193	0.0794194	0.00225551	0.390106	0.413482	0.00222656	0.000180475
		AL20-26_BSE-image2_pyroxene_3	Grain 1; Relict core		53.154	0.197	2.236	5.706	0.16	15.723	23.187	0.138	0.017	0.086		53.798	0.06	1.384	18.005	0.392	26.093	0.34	0.002	0.017	0.107		789.516	12.1882		789.516		890.342	854.604	12.1882	-2.44048	932.919	0.525929		0.145559		0.884657	0.00246624	0.02193	0.0794194	0.00225551	0.390106	0.413482	0.00222656	0.000180475
		AL20-26_BSE-image2_pyroxene_4	Grain 1; Relict core		53.154	0.197	2.236	5.706	0.16	15.723	23.187	0.138	0.017	0.086		53.934	0.011	1.393	17.979	0.385	26.214	0.268	0.002	0.018	0.139		794.735	14.7624		794.735		900.049	862.488	14.7624	-4.71053	955.829	0.529132		0.114507		0.884657	0.00246624	0.02193	0.0794194	0.00225551	0.390106	0.413482	0.00222656	0.000180475
		AL20-26_BSE-image2_pyroxene_5	Grain 1; Relict core		53.154	0.197	2.236	5.706	0.16	15.723	23.187	0.138	0.017	0.086		53.814	0.073	1.388	18.438	0.45	25.434	0.608	0	0	0.088		780.148	9.01292		780.148		876.763	843.47	9.01292	0.766444	904.66	0.500607		0.260705		0.884657	0.00246624	0.02193	0.0794194	0.00225551	0.390106	0.413482	0.00222656	0.000180475
		AL20-26_BSE-image2_pyroxene_7	Grain 2; relict core		53.154	0.197	2.236	5.706	0.16	15.723	23.187	0.138	0.017	0.086		53.528	0.069	1.504	18.165	0.447	25.515	0.541	-0.001	0.015	0.159		782.511	9.49664		782.511		877.964	845.144	9.49664	0.344183	908.965	0.509749		0.232629		0.884657	0.00246624	0.02193	0.0794194	0.00225551	0.390106	0.413482	0.00222656	0.000180475
		AL20-26_BSE-image2_pyroxene_8	Grain 2; relict core		53.154	0.197	2.236	5.706	0.16	15.723	23.187	0.138	0.017	0.086		53.607	0.089	1.531	18.288	0.388	25.633	0.432	-0.011	-0.002	0.098		783.059	10.3795		783.059		882.79	848.794	10.3795	-0.676295	916.822	0.508662		0.185471		0.884657	0.00246624	0.02193	0.0794194	0.00225551	0.390106	0.413482	0.00222656	0.000180475
		AL20-26_BSE-image2_pyroxene_9	Grain 2; relict core		53.154	0.197	2.236	5.706	0.16	15.723	23.187	0.138	0.017	0.086		53.989	0.12	1.407	18.056	0.447	25.733	0.619	-0.007	0.011	0.085		781.244	7.75722		781.244		872.8	840.113	7.75722	0.409326	893.484	0.517208		0.26448		0.884657	0.00246624	0.02193	0.0794194	0.00225551	0.390106	0.413482	0.00222656	0.000180475
		AL20-26_BSE-image2_pyroxene_10	Grain 2; relict core 2		53.154	0.197	2.236	5.706	0.16	15.723	23.187	0.138	0.017	0.086		53.747	0.045	1.501	17.412	0.42	26.125	0.657	-0.007	0.006	0.062		786.447	7.40479		786.447		875.839	839.355	7.40479	1.05863	890.348	0.544508		0.281393		0.884657	0.00246624	0.02193	0.0794194	0.00225551	0.390106	0.413482	0.00222656	0.000180475
		AL20-26_BSE-image2_pyroxene_11	Grain 2; relict core 2		53.154	0.197	2.236	5.706	0.16	15.723	23.187	0.138	0.017	0.086		53.807	0.062	1.424	18.035	0.365	25.801	0.373	0.005	0.016	0.065		786.802	11.3905		786.802		890.366	852.567	11.3905	-1.66496	925.82	0.519179		0.16003		0.884657	0.00246624	0.02193	0.0794194	0.00225551	0.390106	0.413482	0.00222656	0.000180475
AL20-26_BSE-image2_cpx_7	Grain 2; relict core	AL20-26_BSE-image2_pyroxene_1	Grain 1; Relict core		53.02	0.187	2.089	6.326	0.232	16.362	22.179	0.128	0.008	0.106		53.34	0.016	1.679	18.589	0.397	25.393	0.3	-0.001	0.021	0.054		888.65	18.5368		888.65		977.541	961.526	18.5368	-4.27651	1098.32	0.528142		0.090479		0.882427	0.00234105	0.0204882	0.0880489	0.00327048	0.405961	0.395507	0.00206522	8.49293e-05
		AL20-26_BSE-image2_pyroxene_2	Grain 1; Relict core		53.02	0.187	2.089	6.326	0.232	16.362	22.179	0.128	0.008	0.106		53.77	0.02	1.469	18.443	0.402	25.862	0.291	0.008	0.006	0.13		892.779	18.8891		892.779		980.812	966.119	18.8891	-5.19462	1101.72	0.542155		0.0871498		0.882427	0.00234105	0.0204882	0.0880489	0.00327048	0.405961	0.395507	0.00206522	8.49293e-05
		AL20-26_BSE-image2_pyroxene_3	Grain 1; Relict core		53.02	0.187	2.089	6.326	0.232	16.362	22.179	0.128	0.008	0.106		53.798	0.06	1.384	18.005	0.392	26.093	0.34	0.002	0.017	0.107		890.312	15.6968		890.312		968.176	954.892	15.6968	-3.28477	1070.86	0.560304		0.101848		0.882427	0.00234105	0.0204882	0.0880489	0.00327048	0.405961	0.395507	0.00206522	8.49293e-05
		AL20-26_BSE-image2_pyroxene_4	Grain 1; Relict core		53.02	0.187	2.089	6.326	0.232	16.362	22.179	0.128	0.008	0.106		53.934	0.011	1.393	17.979	0.385	26.214	0.268	0.002	0.018	0.139		898.401	19.2226		898.401		984.253	968.658	19.2226	-6.75294	1104.95	0.563716		0.0801207		0.882427	0.00234105	0.0204882	0.0880489	0.00327048	0.405961	0.395507	0.00206522	8.49293e-05
		AL20-26_BSE-image2_pyroxene_5	Grain 1; Relict core		53.02	0.187	2.089	6.326	0.232	16.362	22.179	0.128	0.008	0.106		53.814	0.073	1.388	18.438	0.45	25.434	0.608	0	0	0.088		875.702	10.9719		875.702		945.166	935.014	10.9719	1.84801	1025.18	0.533327		0.182417		0.882427	0.00234105	0.0204882	0.0880489	0.00327048	0.405961	0.395507	0.00206522	8.49293e-05
		AL20-26_BSE-image2_pyroxene_7	Grain 2; relict core		53.02	0.187	2.089	6.326	0.232	16.362	22.179	0.128	0.008	0.106		53.528	0.069	1.504	18.165	0.447	25.515	0.541	-0.001	0.015	0.159		879.079	11.6921		879.079		947.623	937.985	11.6921	1.14155	1032.15	0.543066		0.162771		0.882427	0.00234105	0.0204882	0.0880489	0.00327048	0.405961	0.395507	0.00206522	8.49293e-05
		AL20-26_BSE-image2_pyroxene_8	Grain 2; relict core		53.02	0.187	2.089	6.326	0.232	16.362	22.179	0.128	0.008	0.106		53.607	0.089	1.531	18.288	0.388	25.633	0.432	-0.011	-0.002	0.098		881.048	13.1332		881.048		955.79	944.67	13.1332	-0.593647	1046.08	0.541909		0.129775		0.882427	0.00234105	0.0204882	0.0880489	0.00327048	0.405961	0.395507	0.00206522	8.49293e-05
		AL20-26_BSE-image2_pyroxene_9	Grain 2; relict core		53.02	0.187	2.089	6.326	0.232	16.362	22.179	0.128	0.008	0.106		53.989	0.12	1.407	18.056	0.447	25.733	0.619	-0.007	0.011	0.085		877.105	9.68825		877.105		940.439	930.784	9.68825	1.54372	1012.77	0.551013		0.185058		0.882427	0.00234105	0.0204882	0.0880489	0.00327048	0.405961	0.395507	0.00206522	8.49293e-05
		AL20-26_BSE-image2_pyroxene_10	Grain 2; relict core 2		53.02	0.187	2.089	6.326	0.232	16.362	22.179	0.128	0.008	0.106		53.747	0.045	1.501	17.412	0.42	26.125	0.657	-0.007	0.006	0.062		882.993	9.21976		882.993		943.452	929.412	9.21976	2.38573	1008.25	0.580097		0.196892		0.882427	0.00234105	0.0204882	0.0880489	0.00327048	0.405961	0.395507	0.00206522	8.49293e-05
		AL20-26_BSE-image2_pyroxene_11	Grain 2; relict core 2		53.02	0.187	2.089	6.326	0.232	16.362	22.179	0.128	0.008	0.106		53.807	0.062	1.424	18.035	0.365	25.801	0.373	0.005	0.016	0.065		886.431	14.582		886.431		966.719	951.085	14.582	-2.11917	1060.08	0.553112		0.111973		0.882427	0.00234105	0.0204882	0.0880489	0.00327048	0.405961	0.395507	0.00206522	8.49293e-05
AL20-26_BSE-image2_cpx_8	Grain 2; relict core	AL20-26_BSE-image2_pyroxene_1	Grain 1; Relict core		53.141	0.192	2.202	6.511	0.184	16.161	21.88	0.114	0.015	0.097		53.34	0.016	1.679	18.589	0.397	25.393	0.3	-0.001	0.021	0.054		913.956	19.6816		913.956		985.84	975.278	19.6816	-4.44377	1133.87	0.550348		0.0832341		0.884441	0.00240364	0.0215965	0.0906239	0.00259383	0.400974	0.390175	0.00183934	0.000159242
		AL20-26_BSE-image2_pyroxene_2	Grain 1; Relict core		53.141	0.192	2.202	6.511	0.184	16.161	21.88	0.114	0.015	0.097		53.77	0.02	1.469	18.443	0.402	25.862	0.291	0.008	0.006	0.13		918.357	20.0776		918.357		989.381	980.188	20.0776	-5.41064	1137.77	0.56495		0.0801714		0.884441	0.00240364	0.0215965	0.0906239	0.00259383	0.400974	0.390175	0.00183934	0.000159242
		AL20-26_BSE-image2_pyroxene_3	Grain 1; Relict core		53.141	0.192	2.202	6.511	0.184	16.161	21.88	0.114	0.015	0.097		53.798	0.06	1.384	18.005	0.392	26.093	0.34	0.002	0.017	0.107		915.406	16.7139		915.406		975.707	967.926	16.7139	-3.28328	1104.68	0.583862		0.0936927		0.884441	0.00240364	0.0215965	0.0906239	0.00259383	0.400974	0.390175	0.00183934	0.000159242
		AL20-26_BSE-image2_pyroxene_4	Grain 1; Relict core		53.141	0.192	2.202	6.511	0.184	16.161	21.88	0.114	0.015	0.097		53.934	0.011	1.393	17.979	0.385	26.214	0.268	0.002	0.018	0.139		924.462	20.5154		924.462		993.396	983.245	20.5154	-7.09269	1142.08	0.587418		0.0737052		0.884441	0.00240364	0.0215965	0.0906239	0.00259383	0.400974	0.390175	0.00183934	0.000159242
		AL20-26_BSE-image2_pyroxene_5	Grain 1; Relict core		53.141	0.192	2.202	6.511	0.184	16.161	21.88	0.114	0.015	0.097		53.814	0.073	1.388	18.438	0.45	25.434	0.608	0	0	0.088		899.092	11.5397		899.092		950.31	945.736	11.5397	2.39941	1053.77	0.555751		0.16781		0.884441	0.00240364	0.0215965	0.0906239	0.00259383	0.400974	0.390175	0.00183934	0.000159242
		AL20-26_BSE-image2_pyroxene_7	Grain 2; relict core		53.141	0.192	2.202	6.511	0.184	16.161	21.88	0.114	0.015	0.097		53.528	0.069	1.504	18.165	0.447	25.515	0.541	-0.001	0.015	0.159		902.785	12.3284		902.785		953.105	949.048	12.3284	1.61155	1061.53	0.5659		0.149738		0.884441	0.00240364	0.0215965	0.0906239	0.00259383	0.400974	0.390175	0.00183934	0.000159242
		AL20-26_BSE-image2_pyroxene_8	Grain 2; relict core		53.141	0.192	2.202	6.511	0.184	16.161	21.88	0.114	0.015	0.097		53.607	0.089	1.531	18.288	0.388	25.633	0.432	-0.011	-0.002	0.098		905.244	13.9313		905.244		962.115	956.542	13.9313	-0.327307	1077.3	0.564693		0.119383		0.884441	0.00240364	0.0215965	0.0906239	0.00259383	0.400974	0.390175	0.00183934	0.000159242
		AL20-26_BSE-image2_pyroxene_9	Grain 2; relict core		53.141	0.192	2.202	6.511	0.184	16.161	21.88	0.114	0.015	0.097		53.989	0.12	1.407	18.056	0.447	25.733	0.619	-0.007	0.011	0.085		900.54	10.248		900.54		945.495	941.377	10.248	2.10844	1041.06	0.57418		0.17024		0.884441	0.00240364	0.0215965	0.0906239	0.00259383	0.400974	0.390175	0.00183934	0.000159242
		AL20-26_BSE-image2_pyroxene_10	Grain 2; relict core 2		53.141	0.192	2.202	6.511	0.184	16.161	21.88	0.114	0.015	0.097		53.747	0.045	1.501	17.412	0.42	26.125	0.657	-0.007	0.006	0.062		906.57	9.74585		906.57		948.389	939.843	9.74585	3.00377	1036.12	0.604487		0.181126		0.884441	0.00240364	0.0215965	0.0906239	0.00259383	0.400974	0.390175	0.00183934	0.000159242
		AL20-26_BSE-image2_pyroxene_11	Grain 2; relict core 2		53.141	0.192	2.202	6.511	0.184	16.161	21.88	0.114	0.015	0.097		53.807	0.062	1.424	18.035	0.365	25.801	0.373	0.005	0.016	0.065		911.151	15.507		911.151		973.792	963.638	15.507	-2.00627	1092.8	0.576368		0.103007		0.884441	0.00240364	0.0215965	0.0906239	0.00259383	0.400974	0.390175	0.00183934	0.000159242
AL20-26_BSE-image2_cpx_9	Grain 2; relict core	AL20-26_BSE-image2_pyroxene_1	Grain 1; Relict core		52.074	0.41	2.661	7.707	0.21	15.92	21.611	0.121	0.008	0.123		53.34	0.016	1.679	18.589	0.397	25.393	0.3	-0.001	0.021	0.054		931.15	20.4404		931.15		1018.82	1002.61	20.4404	-6.06632	1149.8	0.661303		0.0790391		0.866682	0.00513278	0.0260982	0.107271	0.00296035	0.394994	0.385378	0.00195228	8.49293e-05
		AL20-26_BSE-image2_pyroxene_2	Grain 1; Relict core		52.074	0.41	2.661	7.707	0.21	15.92	21.611	0.121	0.008	0.123		53.77	0.02	1.469	18.443	0.402	25.862	0.291	0.008	0.006	0.13		935.793	20.8654		935.793		1022.75	1007.93	20.8654	-7.06274	1154.01	0.678848		0.0761308		0.866682	0.00513278	0.0260982	0.107271	0.00296035	0.394994	0.385378	0.00195228	8.49293e-05
		AL20-26_BSE-image2_pyroxene_3	Grain 1; Relict core		52.074	0.41	2.661	7.707	0.21	15.92	21.611	0.121	0.008	0.123		53.798	0.06	1.384	18.005	0.392	26.093	0.34	0.002	0.017	0.107		931.975	17.388		931.975		1007.57	994.471	17.388	-4.81579	1119.59	0.701574		0.0889706		0.866682	0.00513278	0.0260982	0.107271	0.00296035	0.394994	0.385378	0.00195228	8.49293e-05
		AL20-26_BSE-image2_pyroxene_4	Grain 1; Relict core		52.074	0.41	2.661	7.707	0.21	15.92	21.611	0.121	0.008	0.123		53.934	0.011	1.393	17.979	0.385	26.214	0.268	0.002	0.018	0.139		942.294	21.3723		942.294		1027.41	1011.47	21.3723	-8.82335	1159.02	0.705846		0.0699904		0.866682	0.00513278	0.0260982	0.107271	0.00296035	0.394994	0.385378	0.00195228	8.49293e-05
		AL20-26_BSE-image2_pyroxene_5	Grain 1; Relict core		52.074	0.41	2.661	7.707	0.21	15.92	21.611	0.121	0.008	0.123		53.814	0.073	1.388	18.438	0.45	25.434	0.608	0	0	0.088		913.687	11.9161		913.687		979.082	969.828	11.9161	1.19339	1065.43	0.667795		0.159352		0.866682	0.00513278	0.0260982	0.107271	0.00296035	0.394994	0.385378	0.00195228	8.49293e-05
		AL20-26_BSE-image2_pyroxene_7	Grain 2; relict core		52.074	0.41	2.661	7.707	0.21	15.92	21.611	0.121	0.008	0.123		53.528	0.069	1.504	18.165	0.447	25.515	0.541	-0.001	0.015	0.159		917.713	12.7502		917.713		982.268	973.501	12.7502	0.357172	1073.69	0.67999		0.142191		0.866682	0.00513278	0.0260982	0.107271	0.00296035	0.394994	0.385378	0.00195228	8.49293e-05
		AL20-26_BSE-image2_pyroxene_8	Grain 2; relict core		52.074	0.41	2.661	7.707	0.21	15.92	21.611	0.121	0.008	0.123		53.607	0.089	1.531	18.288	0.388	25.633	0.432	-0.011	-0.002	0.098		920.767	14.4604		920.767		992.369	981.843	14.4604	-1.70449	1090.61	0.67854		0.113367		0.866682	0.00513278	0.0260982	0.107271	0.00296035	0.394994	0.385378	0.00195228	8.49293e-05
		AL20-26_BSE-image2_pyroxene_9	Grain 2; relict core		52.074	0.41	2.661	7.707	0.21	15.92	21.611	0.121	0.008	0.123		53.989	0.12	1.407	18.056	0.447	25.733	0.619	-0.007	0.011	0.085		914.956	10.619		914.956		973.946	965.223	10.619	0.901859	1052.59	0.68994		0.161659		0.866682	0.00513278	0.0260982	0.107271	0.00296035	0.394994	0.385378	0.00195228	8.49293e-05
		AL20-26_BSE-image2_pyroxene_10	Grain 2; relict core 2		52.074	0.41	2.661	7.707	0.21	15.92	21.611	0.121	0.008	0.123		53.747	0.045	1.501	17.412	0.42	26.125	0.657	-0.007	0.006	0.062		920.977	10.0945		920.977		976.911	963.519	10.0945	1.8279	1047.4	0.726357		0.171997		0.866682	0.00513278	0.0260982	0.107271	0.00296035	0.394994	0.385378	0.00195228	8.49293e-05
		AL20-26_BSE-image2_pyroxene_11	Grain 2; relict core 2		52.074	0.41	2.661	7.707	0.21	15.92	21.611	0.121	0.008	0.123		53.807	0.062	1.424	18.035	0.365	25.801	0.373	0.005	0.016	0.065		927.276	16.1202		927.276		1005.22	989.683	16.1202	-3.47373	1107.04	0.692568		0.0978157		0.866682	0.00513278	0.0260982	0.107271	0.00296035	0.394994	0.385378	0.00195228	8.49293e-05
AL20-26_BSE-image3_cpx_1	Grain 1	AL20-26_BSE-image3_pyroxene_1	Grain 1		53.053	0.215	1.993	5.259	0.132	15.847	23.482	0.112	0.008	0.067		54.288	0.076	1.363	17.557	0.417	26.176	0.811	0.007	0.021	0.052		743.843	5.99186		743.843		857.249	811.854	5.99186	-0.235016	838.842	0.494777		0.411032		0.882976	0.00269158	0.0195467	0.0731978	0.00186079	0.393183	0.418743	0.00180707	8.49293e-05
		AL20-26_BSE-image3_pyroxene_2	Grain 1		53.053	0.215	1.993	5.259	0.132	15.847	23.482	0.112	0.008	0.067		54.263	0.083	1.344	17.079	0.41	26.576	0.604	0.001	0.02	0.069		746.623	6.22523		746.623		855.381	811.218	6.22523	-0.529557	840.849	0.516396		0.306287		0.882976	0.00269158	0.0195467	0.0731978	0.00186079	0.393183	0.418743	0.00180707	8.49293e-05
		AL20-26_BSE-image3_pyroxene_3	Grain 1		53.053	0.215	1.993	5.259	0.132	15.847	23.482	0.112	0.008	0.067		54.287	0.114	1.258	17.412	0.393	26.27	1.092	0.011	0.016	-0.026		745.239	4.74938		745.239		860.421	812.011	4.74938	-0.943026	828.159	0.500688		0.553191		0.882976	0.00269158	0.0195467	0.0731978	0.00186079	0.393183	0.418743	0.00180707	8.49293e-05
		AL20-26_BSE-image3_pyroxene_4	Grain 1		53.053	0.215	1.993	5.259	0.132	15.847	23.482	0.112	0.008	0.067		53.893	0.156	1.494	18.231	0.38	25.856	0.349	-0.01	0.018	0.002		741.663	9.67919		741.663		861.523	819.177	9.67919	-2.72062	870.549	0.47066		0.177904		0.882976	0.00269158	0.0195467	0.0731978	0.00186079	0.393183	0.418743	0.00180707	8.49293e-05
		AL20-26_BSE-image3_pyroxene_5	Grain 1		53.053	0.215	1.993	5.259	0.132	15.847	23.482	0.112	0.008	0.067		53.883	0.082	1.554	17.835	0.417	25.886	0.792	-0.003	0.008	0.047		741.722	6.36455		741.722		856.154	811.757	6.36455	0.0212388	842.047	0.481668		0.403119		0.882976	0.00269158	0.0195467	0.0731978	0.00186079	0.393183	0.418743	0.00180707	8.49293e-05
		AL20-26_BSE-image3_pyroxene_6	Grain 2		53.053	0.215	1.993	5.259	0.132	15.847	23.482	0.112	0.008	0.067		53.856	0.089	1.328	17.54	0.37	25.567	1.083	-0.006	0.015	0.037		742.032	4.86919		742.032		859.594	812.74	4.86919	-0.94903	829.189	0.483734		0.554262		0.882976	0.00269158	0.0195467	0.0731978	0.00186079	0.393183	0.418743	0.00180707	8.49293e-05
		AL20-26_BSE-image3_pyroxene_7	Grain 2		53.053	0.215	1.993	5.259	0.132	15.847	23.482	0.112	0.008	0.067		54.095	0.027	1.416	18.158	0.349	25.91	0.601	-0.008	0.007	0.038		741.02	7.81615		741.02		862.012	817.092	7.81615	0.129041	854.529	0.473539		0.305671		0.882976	0.00269158	0.0195467	0.0731978	0.00186079	0.393183	0.418743	0.00180707	8.49293e-05
		AL20-26_BSE-image3_pyroxene_8	Grain 2		53.053	0.215	1.993	5.259	0.132	15.847	23.482	0.112	0.008	0.067		53.955	0.024	1.372	18.123	0.348	25.909	0.571	0.001	0.017	0.071		741.886	8.30948		741.886		864.373	819.289	8.30948	-0.0372651	858.771	0.474435		0.291067		0.882976	0.00269158	0.0195467	0.0731978	0.00186079	0.393183	0.418743	0.00180707	8.49293e-05
		AL20-26_BSE-image3_pyroxene_9	Grain 3		53.053	0.215	1.993	5.259	0.132	15.847	23.482	0.112	0.008	0.067		53.755	0.056	1.347	17.34	0.378	25.988	0.779	0.003	0.018	0.041		744.235	6.04122		744.235		859.354	813.003	6.04122	-0.0936652	839.267	0.49737		0.398828		0.882976	0.00269158	0.0195467	0.0731978	0.00186079	0.393183	0.418743	0.00180707	8.49293e-05
		AL20-26_BSE-image3_pyroxene_10	Grain 3		53.053	0.215	1.993	5.259	0.132	15.847	23.482	0.112	0.008	0.067		53.712	0.114	1.396	17.339	0.431	26.001	0.853	-0.001	0.024	0.047		743.62	5.33629		743.62		853.567	809.701	5.33629	-0.445792	833.205	0.497648		0.436084		0.882976	0.00269158	0.0195467	0.0731978	0.00186079	0.393183	0.418743	0.00180707	8.49293e-05
AL20-26_BSE-image3_cpx_2	Grain 1	AL20-26_BSE-image3_pyroxene_1	Grain 1		53.259	0.153	1.412	5.375	0.175	15.921	23.024	0.112	0.015	0.091		54.288	0.076	1.363	17.557	0.417	26.176	0.811	0.007	0.021	0.052		784.367	6.47999		784.367		870.327	828.99	6.47999	1.61672	887.339	0.50334		0.35173		0.886405	0.0019154	0.0138484	0.0748124	0.00246696	0.395019	0.410575	0.00180707	0.000159242
		AL20-26_BSE-image3_pyroxene_2	Grain 1		53.259	0.153	1.412	5.375	0.175	15.921	23.024	0.112	0.015	0.091		54.263	0.083	1.344	17.079	0.41	26.576	0.604	0.001	0.02	0.069		787.82	6.88028		787.82		869.033	828.832	6.88028	1.11962	890.917	0.525334		0.262097		0.886405	0.0019154	0.0138484	0.0748124	0.00246696	0.395019	0.410575	0.00180707	0.000159242
		AL20-26_BSE-image3_pyroxene_3	Grain 1		53.259	0.153	1.412	5.375	0.175	15.921	23.024	0.112	0.015	0.091		54.287	0.114	1.258	17.412	0.393	26.27	1.092	0.011	0.016	-0.026		785.525	5.11206		785.525		873.12	828.775	5.11206	1.07298	875.109	0.509354		0.473379		0.886405	0.0019154	0.0138484	0.0748124	0.00246696	0.395019	0.410575	0.00180707	0.000159242
		AL20-26_BSE-image3_pyroxene_4	Grain 1		53.259	0.153	1.412	5.375	0.175	15.921	23.024	0.112	0.015	0.091		53.893	0.156	1.494	18.231	0.38	25.856	0.349	-0.01	0.018	0.002		783.321	10.807		783.321		877.188	838.602	10.807	-1.71012	926.022	0.478805		0.152237		0.886405	0.0019154	0.0138484	0.0748124	0.00246696	0.395019	0.410575	0.00180707	0.000159242
		AL20-26_BSE-image3_pyroxene_5	Grain 1		53.259	0.153	1.412	5.375	0.175	15.921	23.024	0.112	0.015	0.091		53.883	0.082	1.554	17.835	0.417	25.886	0.792	-0.003	0.008	0.047		782.081	6.86225		782.081		869.236	828.918	6.86225	1.85218	890.756	0.490004		0.344959		0.886405	0.0019154	0.0138484	0.0748124	0.00246696	0.395019	0.410575	0.00180707	0.000159242
		AL20-26_BSE-image3_pyroxene_6	Grain 2		53.259	0.153	1.412	5.375	0.175	15.921	23.024	0.112	0.015	0.091		53.856	0.089	1.328	17.54	0.37	25.567	1.083	-0.006	0.015	0.037		782.053	5.23117		782.053		872.265	829.532	5.23117	1.05601	876.174	0.492106		0.474296		0.886405	0.0019154	0.0138484	0.0748124	0.00246696	0.395019	0.410575	0.00180707	0.000159242
		AL20-26_BSE-image3_pyroxene_7	Grain 2		53.259	0.153	1.412	5.375	0.175	15.921	23.024	0.112	0.015	0.091		54.095	0.027	1.416	18.158	0.349	25.91	0.601	-0.008	0.007	0.038		781.663	8.47252		781.663		875.883	834.968	8.47252	1.75144	905.152	0.481734		0.261571		0.886405	0.0019154	0.0138484	0.0748124	0.00246696	0.395019	0.410575	0.00180707	0.000159242
		AL20-26_BSE-image3_pyroxene_8	Grain 2		53.259	0.153	1.412	5.375	0.175	15.921	23.024	0.112	0.015	0.091		53.955	0.024	1.372	18.123	0.348	25.909	0.571	0.001	0.017	0.071		782.649	8.99879		782.649		878.447	837.364	8.99879	1.54459	909.857	0.482646		0.249073		0.886405	0.0019154	0.0138484	0.0748124	0.00246696	0.395019	0.410575	0.00180707	0.000159242
		AL20-26_BSE-image3_pyroxene_9	Grain 3		53.259	0.153	1.412	5.375	0.175	15.921	23.024	0.112	0.015	0.091		53.755	0.056	1.347	17.34	0.378	25.988	0.779	0.003	0.018	0.041		784.833	6.54428		784.833		872.555	830.234	6.54428	1.74054	887.914	0.505978		0.341288		0.886405	0.0019154	0.0138484	0.0748124	0.00246696	0.395019	0.410575	0.00180707	0.000159242
		AL20-26_BSE-image3_pyroxene_10	Grain 3		53.259	0.153	1.412	5.375	0.175	15.921	23.024	0.112	0.015	0.091		53.712	0.114	1.396	17.339	0.431	26.001	0.853	-0.001	0.024	0.047		784.082	5.79637		784.082		866.428	826.661	5.79637	1.44227	881.227	0.506261		0.373168		0.886405	0.0019154	0.0138484	0.0748124	0.00246696	0.395019	0.410575	0.00180707	0.000159242
AL20-26_BSE-image3_cpx_3	Grain 1	AL20-26_BSE-image3_pyroxene_1	Grain 1		52.621	0.204	2.194	5.607	0.185	15.715	23.276	0.13	0.006	0.074		54.288	0.076	1.363	17.557	0.417	26.176	0.811	0.007	0.021	0.052		756.296	6.17496		756.296		872.217	829.502	6.17496	-0.244994	851.313	0.531948		0.386584		0.875786	0.00255387	0.021518	0.0780415	0.00260793	0.389908	0.415069	0.00209749	6.3697e-05
		AL20-26_BSE-image3_pyroxene_2	Grain 1		52.621	0.204	2.194	5.607	0.185	15.715	23.276	0.13	0.006	0.074		54.263	0.083	1.344	17.079	0.41	26.576	0.604	0.001	0.02	0.069		759.31	6.47094		759.31		870.522	829.028	6.47094	-0.616289	853.883	0.555192		0.288069		0.875786	0.00255387	0.021518	0.0780415	0.00260793	0.389908	0.415069	0.00209749	6.3697e-05
		AL20-26_BSE-image3_pyroxene_3	Grain 1		52.621	0.204	2.194	5.607	0.185	15.715	23.276	0.13	0.006	0.074		54.287	0.114	1.258	17.412	0.393	26.27	1.092	0.011	0.016	-0.026		757.542	4.88542		757.542		875.322	829.524	4.88542	-0.894059	840.116	0.538304		0.520287		0.875786	0.00255387	0.021518	0.0780415	0.00260793	0.389908	0.415069	0.00209749	6.3697e-05
		AL20-26_BSE-image3_pyroxene_4	Grain 1		52.621	0.204	2.194	5.607	0.185	15.715	23.276	0.13	0.006	0.074		53.893	0.156	1.494	18.231	0.38	25.856	0.349	-0.01	0.018	0.002		754.724	10.1022		754.724		877.566	837.889	10.1022	-3.03789	885.412	0.506019		0.167322		0.875786	0.00255387	0.021518	0.0780415	0.00260793	0.389908	0.415069	0.00209749	6.3697e-05
		AL20-26_BSE-image3_pyroxene_5	Grain 1		52.621	0.204	2.194	5.607	0.185	15.715	23.276	0.13	0.006	0.074		53.883	0.082	1.554	17.835	0.417	25.886	0.792	-0.003	0.008	0.047		754.145	6.55123		754.145		871.098	829.411	6.55123	0.00491231	854.58	0.517855		0.379142		0.875786	0.00255387	0.021518	0.0780415	0.00260793	0.389908	0.415069	0.00209749	6.3697e-05
		AL20-26_BSE-image3_pyroxene_6	Grain 2		52.621	0.204	2.194	5.607	0.185	15.715	23.276	0.13	0.006	0.074		53.856	0.089	1.328	17.54	0.37	25.567	1.083	-0.006	0.015	0.037		754.263	5.00497		754.263		874.465	830.284	5.00497	-0.90299	841.154	0.520075		0.521295		0.875786	0.00255387	0.021518	0.0780415	0.00260793	0.389908	0.415069	0.00209749	6.3697e-05
		AL20-26_BSE-image3_pyroxene_7	Grain 2		52.621	0.204	2.194	5.607	0.185	15.715	23.276	0.13	0.006	0.074		54.095	0.027	1.416	18.158	0.349	25.91	0.601	-0.008	0.007	0.038		753.62	8.06235		753.62		877.392	835.165	8.06235	0.0376872	867.701	0.509115		0.28749		0.875786	0.00255387	0.021518	0.0780415	0.00260793	0.389908	0.415069	0.00209749	6.3697e-05
		AL20-26_BSE-image3_pyroxene_8	Grain 2		52.621	0.204	2.194	5.607	0.185	15.715	23.276	0.13	0.006	0.074		53.955	0.024	1.372	18.123	0.348	25.909	0.571	0.001	0.017	0.071		754.551	8.56804		754.551		879.886	837.498	8.56804	-0.142941	872.091	0.510078		0.273755		0.875786	0.00255387	0.021518	0.0780415	0.00260793	0.389908	0.415069	0.00209749	6.3697e-05
		AL20-26_BSE-image3_pyroxene_9	Grain 3		52.621	0.204	2.194	5.607	0.185	15.715	23.276	0.13	0.006	0.074		53.755	0.056	1.347	17.34	0.378	25.988	0.779	0.003	0.018	0.041		756.714	6.22991		756.714		874.419	830.719	6.22991	-0.110272	851.79	0.534737		0.375106		0.875786	0.00255387	0.021518	0.0780415	0.00260793	0.389908	0.415069	0.00209749	6.3697e-05
		AL20-26_BSE-image3_pyroxene_10	Grain 3		52.621	0.204	2.194	5.607	0.185	15.715	23.276	0.13	0.006	0.074		53.712	0.114	1.396	17.339	0.431	26.001	0.853	-0.001	0.024	0.047		756.017	5.50887		756.017		868.367	827.223	5.50887	-0.443557	845.529	0.535035		0.410146		0.875786	0.00255387	0.021518	0.0780415	0.00260793	0.389908	0.415069	0.00209749	6.3697e-05
AL20-26_BSE-image3_cpx_4	Grain 1	AL20-26_BSE-image3_pyroxene_1	Grain 1		53.227	0.192	1.878	5.551	0.141	16.224	22.933	0.092	0.011	0.075		54.288	0.076	1.363	17.557	0.417	26.176	0.811	0.007	0.021	0.052		816.758	6.87902		816.758		898.979	869.925	6.87902	1.64837	923.269	0.510113		0.314623		0.885872	0.00240364	0.0184188	0.077262	0.00198767	0.402537	0.408953	0.00148438	0.000116778
		AL20-26_BSE-image3_pyroxene_2	Grain 1		53.227	0.192	1.878	5.551	0.141	16.224	22.933	0.092	0.011	0.075		54.263	0.083	1.344	17.079	0.41	26.576	0.604	0.001	0.02	0.069		820.795	7.41578		820.795		898.148	870.205	7.41578	0.987209	928.201	0.532403		0.234446		0.885872	0.00240364	0.0184188	0.077262	0.00198767	0.402537	0.408953	0.00148438	0.000116778
		AL20-26_BSE-image3_pyroxene_3	Grain 1		53.227	0.192	1.878	5.551	0.141	16.224	22.933	0.092	0.011	0.075		54.287	0.114	1.258	17.412	0.393	26.27	1.092	0.011	0.016	-0.026		817.694	5.40855		817.694		901.542	869.347	5.40855	1.23769	909.757	0.516208		0.423438		0.885872	0.00240364	0.0184188	0.077262	0.00198767	0.402537	0.408953	0.00148438	0.000116778
		AL20-26_BSE-image3_pyroxene_4	Grain 1		53.227	0.192	1.878	5.551	0.141	16.224	22.933	0.092	0.011	0.075		53.893	0.156	1.494	18.231	0.38	25.856	0.349	-0.01	0.018	0.002		816.732	11.7289		816.732		908.454	882.303	11.7289	-2.36194	967.832	0.485248		0.136176		0.885872	0.00240364	0.0184188	0.077262	0.00198767	0.402537	0.408953	0.00148438	0.000116778
		AL20-26_BSE-image3_pyroxene_5	Grain 1		53.227	0.192	1.878	5.551	0.141	16.224	22.933	0.092	0.011	0.075		53.883	0.082	1.554	17.835	0.417	25.886	0.792	-0.003	0.008	0.047		814.336	7.26911		814.336		897.846	869.871	7.26911	1.86682	926.853	0.496598		0.308566		0.885872	0.00240364	0.0184188	0.077262	0.00198767	0.402537	0.408953	0.00148438	0.000116778
		AL20-26_BSE-image3_pyroxene_6	Grain 2		53.227	0.192	1.878	5.551	0.141	16.224	22.933	0.092	0.011	0.075		53.856	0.089	1.328	17.54	0.37	25.567	1.083	-0.006	0.015	0.037		814.002	5.52709		814.002		900.629	870.178	5.52709	1.21165	910.846	0.498728		0.424258		0.885872	0.00240364	0.0184188	0.077262	0.00198767	0.402537	0.408953	0.00148438	0.000116778
		AL20-26_BSE-image3_pyroxene_7	Grain 2		53.227	0.192	1.878	5.551	0.141	16.224	22.933	0.092	0.011	0.075		54.095	0.027	1.416	18.158	0.349	25.91	0.601	-0.008	0.007	0.038		814.177	9.00909		814.177		905.471	876.975	9.00909	1.59677	942.841	0.488217		0.233975		0.885872	0.00240364	0.0184188	0.077262	0.00198767	0.402537	0.408953	0.00148438	0.000116778
		AL20-26_BSE-image3_pyroxene_8	Grain 2		53.227	0.192	1.878	5.551	0.141	16.224	22.933	0.092	0.011	0.075		53.955	0.024	1.372	18.123	0.348	25.909	0.571	0.001	0.017	0.071		815.266	9.56228		815.266		908.323	879.71	9.56228	1.35701	947.924	0.489141		0.222796		0.885872	0.00240364	0.0184188	0.077262	0.00198767	0.402537	0.408953	0.00148438	0.000116778
		AL20-26_BSE-image3_pyroxene_9	Grain 3		53.227	0.192	1.878	5.551	0.141	16.224	22.933	0.092	0.011	0.075		53.755	0.056	1.347	17.34	0.378	25.988	0.779	0.003	0.018	0.041		817.287	6.95552		817.287		901.405	871.335	6.95552	1.75802	923.972	0.512787		0.305282		0.885872	0.00240364	0.0184188	0.077262	0.00198767	0.402537	0.408953	0.00148438	0.000116778
		AL20-26_BSE-image3_pyroxene_10	Grain 3		53.227	0.192	1.878	5.551	0.141	16.224	22.933	0.092	0.011	0.075		53.712	0.114	1.396	17.339	0.431	26.001	0.853	-0.001	0.024	0.047		816.417	6.17248		816.417		894.727	867.284	6.17248	1.50341	916.776	0.513073		0.333799		0.885872	0.00240364	0.0184188	0.077262	0.00198767	0.402537	0.408953	0.00148438	0.000116778
AL20-26_BSE-image3_cpx_5	Grain 2	AL20-26_BSE-image3_pyroxene_1	Grain 1		53.25	0.148	1.973	5.266	0.175	16.005	23.417	0.108	0.005	0.079		54.288	0.076	1.363	17.557	0.417	26.176	0.811	0.007	0.021	0.052		761.922	6.18988		761.922		867.536	826.253	6.18988	0.30392	860.447	0.490544		0.384718		0.886255	0.00185281	0.0193505	0.0732953	0.00246696	0.397103	0.417584	0.00174253	5.30808e-05
		AL20-26_BSE-image3_pyroxene_2	Grain 1		53.25	0.148	1.973	5.266	0.175	16.005	23.417	0.108	0.005	0.079		54.263	0.083	1.344	17.079	0.41	26.576	0.604	0.001	0.02	0.069		764.979	6.49097		764.979		865.878	825.798	6.49097	-0.0725929	863.082	0.511979		0.286679		0.886255	0.00185281	0.0193505	0.0732953	0.00246696	0.397103	0.417584	0.00174253	5.30808e-05
		AL20-26_BSE-image3_pyroxene_3	Grain 1		53.25	0.148	1.973	5.266	0.175	16.005	23.417	0.108	0.005	0.079		54.287	0.114	1.258	17.412	0.393	26.27	1.092	0.011	0.016	-0.026		763.241	4.89651		763.241		870.593	826.264	4.89651	-0.336564	849.127	0.496406		0.517777		0.886255	0.00185281	0.0193505	0.0732953	0.00246696	0.397103	0.417584	0.00174253	5.30808e-05
		AL20-26_BSE-image3_pyroxene_4	Grain 1		53.25	0.148	1.973	5.266	0.175	16.005	23.417	0.108	0.005	0.079		53.893	0.156	1.494	18.231	0.38	25.856	0.349	-0.01	0.018	0.002		760.137	10.1367		760.137		872.902	834.635	10.1367	-2.52586	894.991	0.466634		0.166515		0.886255	0.00185281	0.0193505	0.0732953	0.00246696	0.397103	0.417584	0.00174253	5.30808e-05
		AL20-26_BSE-image3_pyroxene_5	Grain 1		53.25	0.148	1.973	5.266	0.175	16.005	23.417	0.108	0.005	0.079		53.883	0.082	1.554	17.835	0.417	25.886	0.792	-0.003	0.008	0.047		759.722	6.56645		759.722		866.43	826.164	6.56645	0.551225	863.743	0.477548		0.377312		0.886255	0.00185281	0.0193505	0.0732953	0.00246696	0.397103	0.417584	0.00174253	5.30808e-05
		AL20-26_BSE-image3_pyroxene_6	Grain 2		53.25	0.148	1.973	5.266	0.175	16.005	23.417	0.108	0.005	0.079		53.856	0.089	1.328	17.54	0.37	25.567	1.083	-0.006	0.015	0.037		759.915	5.01604		759.915		869.745	827.017	5.01604	-0.347525	850.173	0.479596		0.51878		0.886255	0.00185281	0.0193505	0.0732953	0.00246696	0.397103	0.417584	0.00174253	5.30808e-05
		AL20-26_BSE-image3_pyroxene_7	Grain 2		53.25	0.148	1.973	5.266	0.175	16.005	23.417	0.108	0.005	0.079		54.095	0.027	1.416	18.158	0.349	25.91	0.601	-0.008	0.007	0.038		759.113	8.08242		759.113		872.675	831.887	8.08242	0.573408	877.011	0.469488		0.286103		0.886255	0.00185281	0.0193505	0.0732953	0.00246696	0.397103	0.417584	0.00174253	5.30808e-05
		AL20-26_BSE-image3_pyroxene_8	Grain 2		53.25	0.148	1.973	5.266	0.175	16.005	23.417	0.108	0.005	0.079		53.955	0.024	1.372	18.123	0.348	25.909	0.571	0.001	0.017	0.071		760.023	8.58911		760.023		875.146	834.206	8.58911	0.390453	881.446	0.470377		0.272434		0.886255	0.00185281	0.0193505	0.0732953	0.00246696	0.397103	0.417584	0.00174253	5.30808e-05
		AL20-26_BSE-image3_pyroxene_9	Grain 3		53.25	0.148	1.973	5.266	0.175	16.005	23.417	0.108	0.005	0.079		53.755	0.056	1.347	17.34	0.378	25.988	0.779	0.003	0.018	0.041		762.344	6.2453		762.344		869.716	827.462	6.2453	0.438184	860.932	0.493116		0.373297		0.886255	0.00185281	0.0193505	0.0732953	0.00246696	0.397103	0.417584	0.00174253	5.30808e-05
		AL20-26_BSE-image3_pyroxene_10	Grain 3		53.25	0.148	1.973	5.266	0.175	16.005	23.417	0.108	0.005	0.079		53.712	0.114	1.396	17.339	0.431	26.001	0.853	-0.001	0.024	0.047		761.681	5.52293		761.681		863.723	823.99	5.52293	0.108253	854.609	0.493391		0.408167		0.886255	0.00185281	0.0193505	0.0732953	0.00246696	0.397103	0.417584	0.00174253	5.30808e-05
AL20-26_BSE-image3_cpx_6	Grain 2	AL20-26_BSE-image3_pyroxene_1	Grain 1		52.912	0.285	2.079	4.838	0.112	15.793	23.566	0.116	0.014	0.1		54.288	0.076	1.363	17.557	0.417	26.176	0.811	0.007	0.021	0.052		724.058	5.79391		724.058		841.374	792.669	5.79391	-0.688211	815.122	0.456724		0.441198		0.880629	0.00356791	0.0203901	0.0673381	0.00157885	0.391843	0.420241	0.0018716	0.000148626
		AL20-26_BSE-image3_pyroxene_2	Grain 1		52.912	0.285	2.079	4.838	0.112	15.793	23.566	0.116	0.014	0.1		54.263	0.083	1.344	17.079	0.41	26.576	0.604	0.001	0.02	0.069		726.547	5.95958		726.547		839.337	791.877	5.95958	-0.901376	816.518	0.476682		0.328766		0.880629	0.00356791	0.0203901	0.0673381	0.00157885	0.391843	0.420241	0.0018716	0.000148626
		AL20-26_BSE-image3_pyroxene_3	Grain 1		52.912	0.285	2.079	4.838	0.112	15.793	23.566	0.116	0.014	0.1		54.287	0.114	1.258	17.412	0.393	26.27	1.092	0.011	0.016	-0.026		725.594	4.60229		725.594		844.612	792.96	4.60229	-1.46084	805.079	0.462182		0.59379		0.880629	0.00356791	0.0203901	0.0673381	0.00157885	0.391843	0.420241	0.0018716	0.000148626
		AL20-26_BSE-image3_pyroxene_4	Grain 1		52.912	0.285	2.079	4.838	0.112	15.793	23.566	0.116	0.014	0.1		53.893	0.156	1.494	18.231	0.38	25.856	0.349	-0.01	0.018	0.002		721.302	9.22184		721.302		844.566	798.92	9.22184	-2.83782	844.013	0.434462		0.19096		0.880629	0.00356791	0.0203901	0.0673381	0.00157885	0.391843	0.420241	0.0018716	0.000148626
		AL20-26_BSE-image3_pyroxene_5	Grain 1		52.912	0.285	2.079	4.838	0.112	15.793	23.566	0.116	0.014	0.1		53.883	0.082	1.554	17.835	0.417	25.886	0.792	-0.003	0.008	0.047		721.998	6.16271		721.998		840.306	792.566	6.16271	-0.423744	818.23	0.444624		0.432705		0.880629	0.00356791	0.0203901	0.0673381	0.00157885	0.391843	0.420241	0.0018716	0.000148626
		AL20-26_BSE-image3_pyroxene_6	Grain 2		52.912	0.285	2.079	4.838	0.112	15.793	23.566	0.116	0.014	0.1		53.856	0.089	1.328	17.54	0.37	25.567	1.083	-0.006	0.015	0.037		722.507	4.72239		722.507		843.816	793.656	4.72239	-1.46187	806.091	0.446531		0.594941		0.880629	0.00356791	0.0203901	0.0673381	0.00157885	0.391843	0.420241	0.0018716	0.000148626
		AL20-26_BSE-image3_pyroxene_7	Grain 2		52.912	0.285	2.079	4.838	0.112	15.793	23.566	0.116	0.014	0.1		54.095	0.027	1.416	18.158	0.349	25.91	0.601	-0.008	0.007	0.038		721.128	7.54996		721.128		845.718	797.471	7.54996	-0.233752	829.922	0.43712		0.328105		0.880629	0.00356791	0.0203901	0.0673381	0.00157885	0.391843	0.420241	0.0018716	0.000148626
		AL20-26_BSE-image3_pyroxene_8	Grain 2		52.912	0.285	2.079	4.838	0.112	15.793	23.566	0.116	0.014	0.1		53.955	0.024	1.372	18.123	0.348	25.909	0.571	0.001	0.017	0.071		721.921	8.02994		721.921		847.943	799.526	8.02994	-0.384728	833.968	0.437947		0.312429		0.880629	0.00356791	0.0203901	0.0673381	0.00157885	0.391843	0.420241	0.0018716	0.000148626
		AL20-26_BSE-image3_pyroxene_9	Grain 3		52.912	0.285	2.079	4.838	0.112	15.793	23.566	0.116	0.014	0.1		53.755	0.056	1.347	17.34	0.378	25.988	0.779	0.003	0.018	0.041		724.416	5.83721		724.416		843.381	793.748	5.83721	-0.539918	815.487	0.459119		0.428099		0.880629	0.00356791	0.0203901	0.0673381	0.00157885	0.391843	0.420241	0.0018716	0.000148626
		AL20-26_BSE-image3_pyroxene_10	Grain 3		52.912	0.285	2.079	4.838	0.112	15.793	23.566	0.116	0.014	0.1		53.712	0.114	1.396	17.339	0.431	26.001	0.853	-0.001	0.024	0.047		723.888	5.14971		723.888		837.867	790.648	5.14971	-0.912396	809.693	0.459375		0.468089		0.880629	0.00356791	0.0203901	0.0673381	0.00157885	0.391843	0.420241	0.0018716	0.000148626
AL20-29_BSE-image1_cpx_1	Grain 1; alteration	AL20-29_BSE-image1_pyroxene_1	Grain 1; Relict core		52.789	0.139	1.596	6.943	0.173	14.637	22.809	0.204	0.014	0.02		51.865	0.06	1.462	22.202	0.478	22.139	0.336	0.002	0.022	0.168		752.596	21.1257		752.596		881.913	836.86	21.1257	0.536065	991.842	0.473		0.151787		0.878582	0.00174014	0.015653	0.0966367	0.00243877	0.363161	0.406741	0.00329144	0.000148626
		AL20-29_BSE-image1_pyroxene_2	Grain 1; Relict core		52.789	0.139	1.596	6.943	0.173	14.637	22.809	0.204	0.014	0.02		52.208	0.038	1.441	21.098	0.434	22.688	0.335	0.006	0.028	0.187		755.927	18.7071		755.927		880.059	831.635	18.7071	-0.322675	970.662	0.510094		0.150858		0.878582	0.00174014	0.015653	0.0966367	0.00243877	0.363161	0.406741	0.00329144	0.000148626
		AL20-29_BSE-image1_pyroxene_3	Grain 1; Relict core		52.789	0.139	1.596	6.943	0.173	14.637	22.809	0.204	0.014	0.02		52.513	-0.013	1.205	21.56	0.434	22.817	0.403	0.001	0.026	0.168		753.856	18.3029		753.856		878.034	831.52	18.3029	1.44649	967.123	0.502001		0.180643		0.878582	0.00174014	0.015653	0.0966367	0.00243877	0.363161	0.406741	0.00329144	0.000148626
		AL20-29_BSE-image1_pyroxene_4	Grain 1; Relict core		52.789	0.139	1.596	6.943	0.173	14.637	22.809	0.204	0.014	0.02		52.274	0.051	0.987	21.863	0.45	22.517	0.321	0.006	0.019	0.103		754.305	20.2753		754.305		882.101	836.537	20.2753	-0.349757	984.395	0.488535		0.144892		0.878582	0.00174014	0.015653	0.0966367	0.00243877	0.363161	0.406741	0.00329144	0.000148626
		AL20-29_BSE-image1_pyroxene_5	Grain 1; Relict core		52.789	0.139	1.596	6.943	0.173	14.637	22.809	0.204	0.014	0.02		52.376	0.055	1.003	22.767	0.468	21.488	0.566	-0.004	0.008	0.03		741.318	17.7935		741.318		871.657	828.228	17.7935	3.33219	962.662	0.447698		0.256068		0.878582	0.00174014	0.015653	0.0966367	0.00243877	0.363161	0.406741	0.00329144	0.000148626
		AL20-29_BSE-image1_pyroxene_6	Grain 1; Relict core		52.789	0.139	1.596	6.943	0.173	14.637	22.809	0.204	0.014	0.02		52.194	0.015	1.293	22.378	0.471	21.198	1.16	0.011	0.007	0.106		741.127	15.0068		741.127		874.069	825.655	15.0068	2.97565	938.259	0.449333		0.524559		0.878582	0.00174014	0.015653	0.0966367	0.00243877	0.363161	0.406741	0.00329144	0.000148626
		AL20-29_BSE-image1_pyroxene_7	Grain 1; Relict core		52.789	0.139	1.596	6.943	0.173	14.637	22.809	0.204	0.014	0.02		52.038	0.024	1.422	22.208	0.473	21.547	0.875	0.006	0.01	0.21		743.458	16.0323		743.458		872.668	827.053	16.0323	3.5668	947.239	0.460227		0.39537		0.878582	0.00174014	0.015653	0.0966367	0.00243877	0.363161	0.406741	0.00329144	0.000148626
		AL20-29_BSE-image1_pyroxene_8	Grain 1; Relict core		52.789	0.139	1.596	6.943	0.173	14.637	22.809	0.204	0.014	0.02		52.168	0.029	1.301	22.352	0.446	21.608	0.372	0.01	0.021	0.161		748.513	20.7072		748.513		884.292	837.091	20.7072	1.23616	988.177	0.458557		0.168454		0.878582	0.00174014	0.015653	0.0966367	0.00243877	0.363161	0.406741	0.00329144	0.000148626
		AL20-29_BSE-image1_pyroxene_9	Grain 1; Relict core		52.789	0.139	1.596	6.943	0.173	14.637	22.809	0.204	0.014	0.02		52.211	0.06	1.048	22.812	0.507	21.825	0.331	0	0.011	0.008		749.285	21.8012		749.285		880.054	836.159	21.8012	0.724103	997.757	0.453822		0.149695		0.878582	0.00174014	0.015653	0.0966367	0.00243877	0.363161	0.406741	0.00329144	0.000148626
AL20-29_BSE-image1_cpx_2	Grain 1; alteration	AL20-29_BSE-image1_pyroxene_1	Grain 1; Relict core		52.764	0.12	1.632	7.102	0.218	14.617	22.625	0.245	0.014	0.02		51.865	0.06	1.462	22.202	0.478	22.139	0.336	0.002	0.022	0.168		767.01	21.7536		767.01		893.22	851.962	21.7536	0.461274	1011.63	0.484494		0.140531		0.878166	0.00150228	0.0160061	0.0988498	0.00307313	0.362665	0.40346	0.00395296	0.000148626
		AL20-29_BSE-image1_pyroxene_2	Grain 1; Relict core		52.764	0.12	1.632	7.102	0.218	14.617	22.625	0.245	0.014	0.02		52.208	0.038	1.441	21.098	0.434	22.688	0.335	0.006	0.028	0.187		770.46	19.3389		770.46		891.335	846.56	19.3389	-0.397477	990.247	0.522489		0.139671		0.878166	0.00150228	0.0160061	0.0988498	0.00307313	0.362665	0.40346	0.00395296	0.000148626
		AL20-29_BSE-image1_pyroxene_3	Grain 1; Relict core		52.764	0.12	1.632	7.102	0.218	14.617	22.625	0.245	0.014	0.02		52.513	-0.013	1.205	21.56	0.434	22.817	0.403	0.001	0.026	0.168		768.095	18.8305		768.095		888.845	846.113	18.8305	1.50378	985.746	0.5142		0.167247		0.878166	0.00150228	0.0160061	0.0988498	0.00307313	0.362665	0.40346	0.00395296	0.000148626
		AL20-29_BSE-image1_pyroxene_4	Grain 1; Relict core		52.764	0.12	1.632	7.102	0.218	14.617	22.625	0.245	0.014	0.02		52.274	0.051	0.987	21.863	0.45	22.517	0.321	0.006	0.019	0.103		768.841	20.9331		768.841		893.533	851.723	20.9331	-0.460757	1004.37	0.500407		0.134148		0.878166	0.00150228	0.0160061	0.0988498	0.00307313	0.362665	0.40346	0.00395296	0.000148626
		AL20-29_BSE-image1_pyroxene_5	Grain 1; Relict core		52.764	0.12	1.632	7.102	0.218	14.617	22.625	0.245	0.014	0.02		52.376	0.055	1.003	22.767	0.468	21.488	0.566	-0.004	0.008	0.03		754.862	18.1657		754.862		881.707	842.219	18.1657	3.57495	979.858	0.458577		0.237079		0.878166	0.00150228	0.0160061	0.0988498	0.00307313	0.362665	0.40346	0.00395296	0.000148626
		AL20-29_BSE-image1_pyroxene_6	Grain 1; Relict core		52.764	0.12	1.632	7.102	0.218	14.617	22.625	0.245	0.014	0.02		52.194	0.015	1.293	22.378	0.471	21.198	1.16	0.011	0.007	0.106		754.147	15.1885		754.147		883.43	838.968	15.1885	3.46058	953.493	0.460252		0.485661		0.878166	0.00150228	0.0160061	0.0988498	0.00307313	0.362665	0.40346	0.00395296	0.000148626
		AL20-29_BSE-image1_pyroxene_7	Grain 1; Relict core		52.764	0.12	1.632	7.102	0.218	14.617	22.625	0.245	0.014	0.02		52.038	0.024	1.422	22.208	0.473	21.547	0.875	0.006	0.01	0.21		756.72	16.2733		756.72		882.231	840.596	16.2733	3.9798	963.1	0.471411		0.366052		0.878166	0.00150228	0.0160061	0.0988498	0.00307313	0.362665	0.40346	0.00395296	0.000148626
		AL20-29_BSE-image1_pyroxene_8	Grain 1; Relict core		52.764	0.12	1.632	7.102	0.218	14.617	22.625	0.245	0.014	0.02		52.168	0.029	1.301	22.352	0.446	21.608	0.372	0.01	0.021	0.161		762.68	21.273		762.68		895.412	852.004	21.273	1.23692	1007.38	0.4697		0.155962		0.878166	0.00150228	0.0160061	0.0988498	0.00307313	0.362665	0.40346	0.00395296	0.000148626
		AL20-29_BSE-image1_pyroxene_9	Grain 1; Relict core		52.764	0.12	1.632	7.102	0.218	14.617	22.625	0.245	0.014	0.02		52.211	0.06	1.048	22.812	0.507	21.825	0.331	0	0.011	0.008		763.625	22.4379		763.625		891.349	851.264	22.4379	0.633756	1017.69	0.464851		0.138595		0.878166	0.00150228	0.0160061	0.0988498	0.00307313	0.362665	0.40346	0.00395296	0.000148626
AL20-29_BSE-image1_cpx_3	Grain 1; alteration	AL20-29_BSE-image1_pyroxene_1	Grain 1; Relict core		53.061	0.148	1.624	7.004	0.217	14.714	22.47	0.263	0.019	0.022		51.865	0.06	1.462	22.202	0.478	22.139	0.336	0.002	0.022	0.168		789.66	22.5585		789.66		901.115	866.035	22.5585	0.654074	1044.56	0.474659		0.128333		0.883109	0.00185281	0.0159277	0.0974857	0.00305903	0.365072	0.400696	0.00424338	0.000201707
		AL20-29_BSE-image1_pyroxene_2	Grain 1; Relict core		53.061	0.148	1.624	7.004	0.217	14.714	22.47	0.263	0.019	0.022		52.208	0.038	1.441	21.098	0.434	22.688	0.335	0.006	0.028	0.187		793.433	20.1487		793.433		899.216	860.47	20.1487	-0.197067	1022.79	0.511883		0.127548		0.883109	0.00185281	0.0159277	0.0974857	0.00305903	0.365072	0.400696	0.00424338	0.000201707
		AL20-29_BSE-image1_pyroxene_3	Grain 1; Relict core		53.061	0.148	1.624	7.004	0.217	14.714	22.47	0.263	0.019	0.022		52.513	-0.013	1.205	21.56	0.434	22.817	0.403	0.001	0.026	0.168		790.68	19.5068		790.68		896.146	859.573	19.5068	1.87299	1016.99	0.503762		0.15273		0.883109	0.00185281	0.0159277	0.0974857	0.00305903	0.365072	0.400696	0.00424338	0.000201707
		AL20-29_BSE-image1_pyroxene_4	Grain 1; Relict core		53.061	0.148	1.624	7.004	0.217	14.714	22.47	0.263	0.019	0.022		52.274	0.051	0.987	21.863	0.45	22.517	0.321	0.006	0.019	0.103		791.714	21.7763		791.714		901.588	865.915	21.7763	-0.311314	1037.49	0.490248		0.122504		0.883109	0.00185281	0.0159277	0.0974857	0.00305903	0.365072	0.400696	0.00424338	0.000201707
		AL20-29_BSE-image1_pyroxene_5	Grain 1; Relict core		53.061	0.148	1.624	7.004	0.217	14.714	22.47	0.263	0.019	0.022		52.376	0.055	1.003	22.767	0.468	21.488	0.566	-0.004	0.008	0.03		776.431	18.6428		776.431		888.104	854.914	18.6428	4.17635	1009.19	0.449268		0.216501		0.883109	0.00185281	0.0159277	0.0974857	0.00305903	0.365072	0.400696	0.00424338	0.000201707
		AL20-29_BSE-image1_pyroxene_6	Grain 1; Relict core		53.061	0.148	1.624	7.004	0.217	14.714	22.47	0.263	0.019	0.022		52.194	0.015	1.293	22.378	0.471	21.198	1.16	0.011	0.007	0.106		775.123	15.4214		775.123		888.886	850.786	15.4214	4.37595	980.092	0.450909		0.443506		0.883109	0.00185281	0.0159277	0.0974857	0.00305903	0.365072	0.400696	0.00424338	0.000201707
		AL20-29_BSE-image1_pyroxene_7	Grain 1; Relict core		53.061	0.148	1.624	7.004	0.217	14.714	22.47	0.263	0.019	0.022		52.038	0.024	1.422	22.208	0.473	21.547	0.875	0.006	0.01	0.21		778.006	16.5823		778.006		887.972	852.704	16.5823	4.80297	990.578	0.461841		0.334279		0.883109	0.00185281	0.0159277	0.0974857	0.00305903	0.365072	0.400696	0.00424338	0.000201707
		AL20-29_BSE-image1_pyroxene_8	Grain 1; Relict core		53.061	0.148	1.624	7.004	0.217	14.714	22.47	0.263	0.019	0.022		52.168	0.029	1.301	22.352	0.446	21.608	0.372	0.01	0.021	0.161		784.99	21.9982		784.99		903.021	865.815	21.9982	1.52547	1039.5	0.460165		0.142425		0.883109	0.00185281	0.0159277	0.0974857	0.00305903	0.365072	0.400696	0.00424338	0.000201707
		AL20-29_BSE-image1_pyroxene_9	Grain 1; Relict core		53.061	0.148	1.624	7.004	0.217	14.714	22.47	0.263	0.019	0.022		52.211	0.06	1.048	22.812	0.507	21.825	0.331	0	0.011	0.008		786.112	23.254		786.112		899.256	865.351	23.254	0.803516	1050.84	0.455414		0.126565		0.883109	0.00185281	0.0159277	0.0974857	0.00305903	0.365072	0.400696	0.00424338	0.000201707
AL20-29_BSE-image1_cpx_4	Grain 1; alteration	AL20-29_BSE-image1_pyroxene_1	Grain 1; Relict core		53.038	0.101	1.36	9.452	0.219	15.607	19.865	0.174	0.015	0.037		51.865	0.06	1.462	22.202	0.478	22.139	0.336	0.002	0.022	0.168		992.915	31.6078		992.915		1077.51	1090.01	31.6078	-3.68411	1359.54	0.603907		0.0649492		0.882726	0.00126442	0.0133384	0.131558	0.00308722	0.387228	0.354243	0.00280741	0.000159242
		AL20-29_BSE-image1_pyroxene_2	Grain 1; Relict core		53.038	0.101	1.36	9.452	0.219	15.607	19.865	0.174	0.015	0.037		52.208	0.038	1.441	21.098	0.434	22.688	0.335	0.006	0.028	0.187		998.848	29.2537		998.848		1075.12	1081.49	29.2537	-4.51581	1334.73	0.651267		0.0645517		0.882726	0.00126442	0.0133384	0.131558	0.00308722	0.387228	0.354243	0.00280741	0.000159242
		AL20-29_BSE-image1_pyroxene_3	Grain 1; Relict core		53.038	0.101	1.36	9.452	0.219	15.607	19.865	0.174	0.015	0.037		52.513	-0.013	1.205	21.56	0.434	22.817	0.403	0.001	0.026	0.168		990.613	27.1106		990.613		1062.2	1072.43	27.1106	-0.598274	1312.15	0.640935		0.0772966		0.882726	0.00126442	0.0133384	0.131558	0.00308722	0.387228	0.354243	0.00280741	0.000159242
		AL20-29_BSE-image1_pyroxene_4	Grain 1; Relict core		53.038	0.101	1.36	9.452	0.219	15.607	19.865	0.174	0.015	0.037		52.274	0.051	0.987	21.863	0.45	22.517	0.321	0.006	0.019	0.103		997.22	31.2562		997.22		1080.7	1092.07	31.2562	-5.14888	1355.83	0.623742		0.0619991		0.882726	0.00126442	0.0133384	0.131558	0.00308722	0.387228	0.354243	0.00280741	0.000159242
		AL20-29_BSE-image1_pyroxene_5	Grain 1; Relict core		53.038	0.101	1.36	9.452	0.219	15.607	19.865	0.174	0.015	0.037		52.376	0.055	1.003	22.767	0.468	21.488	0.566	-0.004	0.008	0.03		964.166	24.0068		964.166		1038.69	1054.12	24.0068	4.28046	1279.44	0.571603		0.109571		0.882726	0.00126442	0.0133384	0.131558	0.00308722	0.387228	0.354243	0.00280741	0.000159242
		AL20-29_BSE-image1_pyroxene_6	Grain 1; Relict core		53.038	0.101	1.36	9.452	0.219	15.607	19.865	0.174	0.015	0.037		52.194	0.015	1.293	22.378	0.471	21.198	1.16	0.011	0.007	0.106		952.745	18.0399		952.745		1025.13	1034.75	18.0399	7.85491	1216.56	0.573691		0.224458		0.882726	0.00126442	0.0133384	0.131558	0.00308722	0.387228	0.354243	0.00280741	0.000159242
		AL20-29_BSE-image1_pyroxene_7	Grain 1; Relict core		53.038	0.101	1.36	9.452	0.219	15.607	19.865	0.174	0.015	0.037		52.038	0.024	1.422	22.208	0.473	21.547	0.875	0.006	0.01	0.21		960.078	20.0564		960.078		1028.42	1041.66	20.0564	7.28862	1237.81	0.5876		0.169178		0.882726	0.00126442	0.0133384	0.131558	0.00308722	0.387228	0.354243	0.00280741	0.000159242
		AL20-29_BSE-image1_pyroxene_8	Grain 1; Relict core		53.038	0.101	1.36	9.452	0.219	15.607	19.865	0.174	0.015	0.037		52.168	0.029	1.301	22.352	0.446	21.608	0.372	0.01	0.021	0.161		983.902	30.1522		983.902		1075.04	1085	30.1522	-1.7592	1344.2	0.585467		0.0720809		0.882726	0.00126442	0.0133384	0.131558	0.00308722	0.387228	0.354243	0.00280741	0.000159242
		AL20-29_BSE-image1_pyroxene_9	Grain 1; Relict core		53.038	0.101	1.36	9.452	0.219	15.607	19.865	0.174	0.015	0.037		52.211	0.06	1.048	22.812	0.507	21.825	0.331	0	0.011	0.008		988.232	32.4297		988.232		1075.59	1089.59	32.4297	-3.76212	1368.2	0.579422		0.0640542		0.882726	0.00126442	0.0133384	0.131558	0.00308722	0.387228	0.354243	0.00280741	0.000159242
AL20-29_BSE-image1_cpx_5	Grain 1; alteration	AL20-29_BSE-image1_pyroxene_1	Grain 1; Relict core		53.042	0.153	1.609	7.052	0.206	14.793	22.719	0.237	0.012	0.026		51.865	0.06	1.462	22.202	0.478	22.139	0.336	0.002	0.022	0.168		771.681	21.8539		771.681		896.92	857.483	21.8539	0.4818	1019.4	0.475359		0.138887		0.882793	0.0019154	0.0157805	0.0981538	0.00290396	0.367032	0.405136	0.00382388	0.000127394
		AL20-29_BSE-image1_pyroxene_2	Grain 1; Relict core		53.042	0.153	1.609	7.052	0.206	14.793	22.719	0.237	0.012	0.026		52.208	0.038	1.441	21.098	0.434	22.688	0.335	0.006	0.028	0.187		775.23	19.4397		775.23		895.022	852.012	19.4397	-0.373381	997.906	0.512638		0.138037		0.882793	0.0019154	0.0157805	0.0981538	0.00290396	0.367032	0.405136	0.00382388	0.000127394
		AL20-29_BSE-image1_pyroxene_3	Grain 1; Relict core		53.042	0.153	1.609	7.052	0.206	14.793	22.719	0.237	0.012	0.026		52.513	-0.013	1.205	21.56	0.434	22.817	0.403	0.001	0.026	0.168		772.815	18.9148		772.815		892.445	851.507	18.9148	1.54884	993.233	0.504505		0.16529		0.882793	0.0019154	0.0157805	0.0981538	0.00290396	0.367032	0.405136	0.00382388	0.000127394
		AL20-29_BSE-image1_pyroxene_4	Grain 1; Relict core		53.042	0.153	1.609	7.052	0.206	14.793	22.719	0.237	0.012	0.026		52.274	0.051	0.987	21.863	0.45	22.517	0.321	0.006	0.019	0.103		773.562	21.0382		773.562		897.254	857.256	21.0382	-0.444615	1012.14	0.490972		0.132578		0.882793	0.0019154	0.0157805	0.0981538	0.00290396	0.367032	0.405136	0.00382388	0.000127394
		AL20-29_BSE-image1_pyroxene_5	Grain 1; Relict core		53.042	0.153	1.609	7.052	0.206	14.793	22.719	0.237	0.012	0.026		52.376	0.055	1.003	22.767	0.468	21.488	0.566	-0.004	0.008	0.03		759.411	18.2251		759.411		885.152	847.485	18.2251	3.64695	987.093	0.449931		0.234305		0.882793	0.0019154	0.0157805	0.0981538	0.00290396	0.367032	0.405136	0.00382388	0.000127394
		AL20-29_BSE-image1_pyroxene_6	Grain 1; Relict core		53.042	0.153	1.609	7.052	0.206	14.793	22.719	0.237	0.012	0.026		52.194	0.015	1.293	22.378	0.471	21.198	1.16	0.011	0.007	0.106		758.655	15.2175		758.655		886.769	844.098	15.2175	3.57317	960.316	0.451575		0.479978		0.882793	0.0019154	0.0157805	0.0981538	0.00290396	0.367032	0.405136	0.00382388	0.000127394
		AL20-29_BSE-image1_pyroxene_7	Grain 1; Relict core		53.042	0.153	1.609	7.052	0.206	14.793	22.719	0.237	0.012	0.026		52.038	0.024	1.422	22.208	0.473	21.547	0.875	0.006	0.01	0.21		761.266	16.3118		761.266		885.598	845.775	16.3118	4.08089	970.059	0.462523		0.361769		0.882793	0.0019154	0.0157805	0.0981538	0.00290396	0.367032	0.405136	0.00382388	0.000127394
		AL20-29_BSE-image1_pyroxene_8	Grain 1; Relict core		53.042	0.153	1.609	7.052	0.206	14.793	22.719	0.237	0.012	0.026		52.168	0.029	1.301	22.352	0.446	21.608	0.372	0.01	0.021	0.161		767.301	21.3634		767.301		899.09	857.493	21.3634	1.26899	1015.03	0.460844		0.154137		0.882793	0.0019154	0.0157805	0.0981538	0.00290396	0.367032	0.405136	0.00382388	0.000127394
		AL20-29_BSE-image1_pyroxene_9	Grain 1; Relict core		53.042	0.153	1.609	7.052	0.206	14.793	22.719	0.237	0.012	0.026		52.211	0.06	1.048	22.812	0.507	21.825	0.331	0	0.011	0.008		768.251	22.5396		768.251		895.039	856.78	22.5396	0.65027	1025.5	0.456086		0.136973		0.882793	0.0019154	0.0157805	0.0981538	0.00290396	0.367032	0.405136	0.00382388	0.000127394
AL20-29_BSE-image1_cpx_6	Grain 2; alteration	AL20-29_BSE-image1_pyroxene_1	Grain 1; Relict core		52.81	0.113	1.514	7.118	0.208	14.6	22.662	0.253	0.026	0.036		51.865	0.06	1.462	22.202	0.478	22.139	0.336	0.002	0.022	0.168		759.881	21.5881		759.881		889.025	844.811	21.5881	0.466188	999.816	0.486151		0.143334		0.878932	0.00141464	0.0148488	0.0990725	0.00293216	0.362243	0.40412	0.00408203	0.00027602
		AL20-29_BSE-image1_pyroxene_2	Grain 1; Relict core		52.81	0.113	1.514	7.118	0.208	14.6	22.662	0.253	0.026	0.036		52.208	0.038	1.441	21.098	0.434	22.688	0.335	0.006	0.028	0.187		763.238	19.1723		763.238		887.153	839.496	19.1723	-0.395294	978.595	0.524276		0.142456		0.878932	0.00141464	0.0148488	0.0990725	0.00293216	0.362243	0.40412	0.00408203	0.00027602
		AL20-29_BSE-image1_pyroxene_3	Grain 1; Relict core		52.81	0.113	1.514	7.118	0.208	14.6	22.662	0.253	0.026	0.036		52.513	-0.013	1.205	21.56	0.434	22.817	0.403	0.001	0.026	0.168		760.964	18.6914		760.964		884.795	839.141	18.6914	1.4717	974.371	0.515959		0.170583		0.878932	0.00141464	0.0148488	0.0990725	0.00293216	0.362243	0.40412	0.00408203	0.00027602
		AL20-29_BSE-image1_pyroxene_4	Grain 1; Relict core		52.81	0.113	1.514	7.118	0.208	14.6	22.662	0.253	0.026	0.036		52.274	0.051	0.987	21.863	0.45	22.517	0.321	0.006	0.019	0.103		761.653	20.7597		761.653		889.304	844.552	20.7597	-0.447466	992.539	0.502118		0.136823		0.878932	0.00141464	0.0148488	0.0990725	0.00293216	0.362243	0.40412	0.00408203	0.00027602
		AL20-29_BSE-image1_pyroxene_5	Grain 1; Relict core		52.81	0.113	1.514	7.118	0.208	14.6	22.662	0.253	0.026	0.036		52.376	0.055	1.003	22.767	0.468	21.488	0.566	-0.004	0.008	0.03		748.001	18.0676		748.001		877.879	835.437	18.0676	3.49792	968.891	0.460146		0.241807		0.878932	0.00141464	0.0148488	0.0990725	0.00293216	0.362243	0.40412	0.00408203	0.00027602
		AL20-29_BSE-image1_pyroxene_6	Grain 1; Relict core		52.81	0.113	1.514	7.118	0.208	14.6	22.662	0.253	0.026	0.036		52.194	0.015	1.293	22.378	0.471	21.198	1.16	0.011	0.007	0.106		747.419	15.1406		747.419		879.782	832.391	15.1406	3.31946	943.18	0.461826		0.495346		0.878932	0.00141464	0.0148488	0.0990725	0.00293216	0.362243	0.40412	0.00408203	0.00027602
		AL20-29_BSE-image1_pyroxene_7	Grain 1; Relict core		52.81	0.113	1.514	7.118	0.208	14.6	22.662	0.253	0.026	0.036		52.038	0.024	1.422	22.208	0.473	21.547	0.875	0.006	0.01	0.21		749.911	16.2098		749.911		878.531	833.946	16.2098	3.85687	952.572	0.473023		0.373352		0.878932	0.00141464	0.0148488	0.0990725	0.00293216	0.362243	0.40412	0.00408203	0.00027602
		AL20-29_BSE-image1_pyroxene_8	Grain 1; Relict core		52.81	0.113	1.514	7.118	0.208	14.6	22.662	0.253	0.026	0.036		52.168	0.029	1.301	22.352	0.446	21.608	0.372	0.01	0.021	0.161		755.64	21.1238		755.64		891.262	844.903	21.1238	1.22298	995.738	0.471306		0.159072		0.878932	0.00141464	0.0148488	0.0990725	0.00293216	0.362243	0.40412	0.00408203	0.00027602
		AL20-29_BSE-image1_pyroxene_9	Grain 1; Relict core		52.81	0.113	1.514	7.118	0.208	14.6	22.662	0.253	0.026	0.036		52.211	0.06	1.048	22.812	0.507	21.825	0.331	0	0.011	0.008		756.547	22.27		756.547		887.162	844.117	22.27	0.644232	1005.81	0.46644		0.141358		0.878932	0.00141464	0.0148488	0.0990725	0.00293216	0.362243	0.40412	0.00408203	0.00027602
AL20-29_BSE-image1_cpx_7	Grain 2; alteration	AL20-29_BSE-image1_pyroxene_1	Grain 1; Relict core		52.864	0.081	1.54	7.964	0.224	14.946	21.562	0.213	0.012	0.017		51.865	0.06	1.462	22.202	0.478	22.139	0.336	0.002	0.022	0.168		875.747	25.4797		875.747		971.767	956.55	25.4797	-0.0619675	1171.74	0.53134		0.0975897		0.879831	0.00101404	0.0151038	0.110848	0.00315771	0.370828	0.384504	0.00343665	0.000127394
		AL20-29_BSE-image1_pyroxene_2	Grain 1; Relict core		52.864	0.081	1.54	7.964	0.224	14.946	21.562	0.213	0.012	0.017		52.208	0.038	1.441	21.098	0.434	22.688	0.335	0.006	0.028	0.187		880.361	23.0878		880.361		969.643	949.837	23.0878	-0.900324	1148.52	0.573009		0.0969924		0.879831	0.00101404	0.0151038	0.110848	0.00315771	0.370828	0.384504	0.00343665	0.000127394
		AL20-29_BSE-image1_pyroxene_3	Grain 1; Relict core		52.864	0.081	1.54	7.964	0.224	14.946	21.562	0.213	0.012	0.017		52.513	-0.013	1.205	21.56	0.434	22.817	0.403	0.001	0.026	0.168		875.91	21.9614		875.91		963.818	946.829	21.9614	1.76935	1137.58	0.563918		0.116142		0.879831	0.00101404	0.0151038	0.110848	0.00315771	0.370828	0.384504	0.00343665	0.000127394
		AL20-29_BSE-image1_pyroxene_4	Grain 1; Relict core		52.864	0.081	1.54	7.964	0.224	14.946	21.562	0.213	0.012	0.017		52.274	0.051	0.987	21.863	0.45	22.517	0.321	0.006	0.019	0.103		878.558	24.8365		878.558		972.975	956.963	24.8365	-1.18718	1165.5	0.548791		0.0931569		0.879831	0.00101404	0.0151038	0.110848	0.00315771	0.370828	0.384504	0.00343665	0.000127394
		AL20-29_BSE-image1_pyroxene_5	Grain 1; Relict core		52.864	0.081	1.54	7.964	0.224	14.946	21.562	0.213	0.012	0.017		52.376	0.055	1.003	22.767	0.468	21.488	0.566	-0.004	0.008	0.03		857.457	20.3744		857.457		951.24	938.37	20.3744	4.89206	1122.17	0.502917		0.164636		0.879831	0.00101404	0.0151038	0.110848	0.00315771	0.370828	0.384504	0.00343665	0.000127394
		AL20-29_BSE-image1_pyroxene_6	Grain 1; Relict core		52.864	0.081	1.54	7.964	0.224	14.946	21.562	0.213	0.012	0.017		52.194	0.015	1.293	22.378	0.471	21.198	1.16	0.011	0.007	0.106		853.073	16.2667		853.073		948.137	930.013	16.2667	6.18957	1082.28	0.504754		0.337259		0.879831	0.00101404	0.0151038	0.110848	0.00315771	0.370828	0.384504	0.00343665	0.000127394
		AL20-29_BSE-image1_pyroxene_7	Grain 1; Relict core		52.864	0.081	1.54	7.964	0.224	14.946	21.562	0.213	0.012	0.017		52.038	0.024	1.422	22.208	0.473	21.547	0.875	0.006	0.01	0.21		857.44	17.7038		857.44		948.337	933.363	17.7038	6.29805	1096.24	0.516992		0.254199		0.879831	0.00101404	0.0151038	0.110848	0.00315771	0.370828	0.384504	0.00343665	0.000127394
		AL20-29_BSE-image1_pyroxene_8	Grain 1; Relict core		52.864	0.081	1.54	7.964	0.224	14.946	21.562	0.213	0.012	0.017		52.168	0.029	1.301	22.352	0.446	21.608	0.372	0.01	0.021	0.161		869.612	24.6304		869.612		972.614	955.121	24.6304	1.14671	1163.49	0.515115		0.108305		0.879831	0.00101404	0.0151038	0.110848	0.00315771	0.370828	0.384504	0.00343665	0.000127394
		AL20-29_BSE-image1_pyroxene_9	Grain 1; Relict core		52.864	0.081	1.54	7.964	0.224	14.946	21.562	0.213	0.012	0.017		52.211	0.06	1.048	22.812	0.507	21.825	0.331	0	0.011	0.008		871.689	26.216		871.689		969.797	955.88	26.216	0.00764417	1178.89	0.509797		0.0962448		0.879831	0.00101404	0.0151038	0.110848	0.00315771	0.370828	0.384504	0.00343665	0.000127394
AL20-29_BSE-image1_cpx_8	Grain 2; alteration	AL20-29_BSE-image1_pyroxene_1	Grain 1; Relict core		52.555	0.326	1.538	7.87	0.195	14.653	22.43	0.228	0.011	0.03		51.865	0.06	1.462	22.202	0.478	22.139	0.336	0.002	0.022	0.168		796.848	22.5262		796.848		924.464	886.641	22.5262	0.193051	1051.12	0.535567		0.128781		0.874688	0.00408118	0.0150842	0.109539	0.0027489	0.363558	0.399983	0.00367867	0.000116778
		AL20-29_BSE-image1_pyroxene_2	Grain 1; Relict core		52.555	0.326	1.538	7.87	0.195	14.653	22.43	0.228	0.011	0.03		52.208	0.038	1.441	21.098	0.434	22.688	0.335	0.006	0.028	0.187		800.425	20.1162		800.425		922.464	880.808	20.1162	-0.666619	1029.24	0.577568		0.127993		0.874688	0.00408118	0.0150842	0.109539	0.0027489	0.363558	0.399983	0.00367867	0.000116778
		AL20-29_BSE-image1_pyroxene_3	Grain 1; Relict core		52.555	0.326	1.538	7.87	0.195	14.653	22.43	0.228	0.011	0.03		52.513	-0.013	1.205	21.56	0.434	22.817	0.403	0.001	0.026	0.168		797.586	19.4797		797.586		919.256	879.887	19.4797	1.39206	1023.46	0.568405		0.153264		0.874688	0.00408118	0.0150842	0.109539	0.0027489	0.363558	0.399983	0.00367867	0.000116778
		AL20-29_BSE-image1_pyroxene_4	Grain 1; Relict core		52.555	0.326	1.538	7.87	0.195	14.653	22.43	0.228	0.011	0.03		52.274	0.051	0.987	21.863	0.45	22.517	0.321	0.006	0.019	0.103		798.846	21.7425		798.846		924.955	886.509	21.7425	-0.772719	1044.01	0.553158		0.122932		0.874688	0.00408118	0.0150842	0.109539	0.0027489	0.363558	0.399983	0.00367867	0.000116778
		AL20-29_BSE-image1_pyroxene_5	Grain 1; Relict core		52.555	0.326	1.538	7.87	0.195	14.653	22.43	0.228	0.011	0.03		52.376	0.055	1.003	22.767	0.468	21.488	0.566	-0.004	0.008	0.03		783.101	18.6237		783.101		910.829	875.032	18.6237	3.67369	1015.69	0.506919		0.217257		0.874688	0.00408118	0.0150842	0.109539	0.0027489	0.363558	0.399983	0.00367867	0.000116778
		AL20-29_BSE-image1_pyroxene_6	Grain 1; Relict core		52.555	0.326	1.538	7.87	0.195	14.653	22.43	0.228	0.011	0.03		52.194	0.015	1.293	22.378	0.471	21.198	1.16	0.011	0.007	0.106		781.435	15.4121		781.435		911.693	870.741	15.4121	3.8435	986.531	0.50877		0.445054		0.874688	0.00408118	0.0150842	0.109539	0.0027489	0.363558	0.399983	0.00367867	0.000116778
		AL20-29_BSE-image1_pyroxene_7	Grain 1; Relict core		52.555	0.326	1.538	7.87	0.195	14.653	22.43	0.228	0.011	0.03		52.038	0.024	1.422	22.208	0.473	21.547	0.875	0.006	0.01	0.21		784.48	16.5699		784.48		910.718	872.739	16.5699	4.28208	997.044	0.521105		0.335446		0.874688	0.00408118	0.0150842	0.109539	0.0027489	0.363558	0.399983	0.00367867	0.000116778
		AL20-29_BSE-image1_pyroxene_8	Grain 1; Relict core		52.555	0.326	1.538	7.87	0.195	14.653	22.43	0.228	0.011	0.03		52.168	0.029	1.301	22.352	0.446	21.608	0.372	0.01	0.021	0.161		792.075	21.9692		792.075		926.483	886.421	21.9692	1.05538	1046.07	0.519214		0.142922		0.874688	0.00408118	0.0150842	0.109539	0.0027489	0.363558	0.399983	0.00367867	0.000116778
		AL20-29_BSE-image1_pyroxene_9	Grain 1; Relict core		52.555	0.326	1.538	7.87	0.195	14.653	22.43	0.228	0.011	0.03		52.211	0.06	1.048	22.812	0.507	21.825	0.331	0	0.011	0.008		793.327	23.2213		793.327		922.505	885.922	23.2213	0.344351	1057.43	0.513853		0.127007		0.874688	0.00408118	0.0150842	0.109539	0.0027489	0.363558	0.399983	0.00367867	0.000116778
AL20-29_BSE-image2_cpx_1	Grain 1; alteration	AL20-29_BSE-image2_pyroxene_1	Grain 1; relict core 1		53.045	0.079	1.54	7.174	0.228	14.915	22.631	0.253	0.016	0.026		52.18	0.018	1.015	23.479	0.435	21.308	0.375	0.002	0.023	0.006		771.188	23.5628		771.188		915.254	877.545	23.5628	2.17523	1042.31	0.436517		0.150219		0.882843	0.000988998	0.0151038	0.0998519	0.0032141	0.370059	0.403567	0.00408203	0.000169859
		AL20-29_BSE-image2_pyroxene_2	Grain 1; relict core 1		53.045	0.079	1.54	7.174	0.228	14.915	22.631	0.253	0.016	0.026		52.441	0.046	0.742	23.623	0.466	21.181	0.352	0.009	0.007	0.052		771.298	24.3759		771.298		915.876	880.63	24.3759	1.25821	1049.59	0.43127		0.140947		0.882843	0.000988998	0.0151038	0.0998519	0.0032141	0.370059	0.403567	0.00408203	0.000169859
		AL20-29_BSE-image2_pyroxene_3	Grain 1; relict core 1		53.045	0.079	1.54	7.174	0.228	14.915	22.631	0.253	0.016	0.026		51.058	1.423	0.897	24.374	0.439	20.688	1.021	0.005	0.006	0.002		741.154	10.7702		741.154		873.674	853.041	10.7702	-0.491306	927.744	0.408253		0.408563		0.882843	0.000988998	0.0151038	0.0998519	0.0032141	0.370059	0.403567	0.00408203	0.000169859
		AL20-29_BSE-image2_pyroxene_4	Grain 1; relict core 1		53.045	0.079	1.54	7.174	0.228	14.915	22.631	0.253	0.016	0.026		52.031	0.053	1.022	24.07	0.407	20.646	0.837	0.017	0.023	0.069		761.513	20.3272		761.513		912.942	875.583	20.3272	5.2396	1013.33	0.41257		0.335639		0.882843	0.000988998	0.0151038	0.0998519	0.0032141	0.370059	0.403567	0.00408203	0.000169859
		AL20-29_BSE-image2_pyroxene_5	Grain 1; relict core 2		53.045	0.079	1.54	7.174	0.228	14.915	22.631	0.253	0.016	0.026		51.957	0.075	0.891	23.978	0.415	21.07	0.51	-0.003	0.008	0.005		765.19	22.025		765.19		910.564	876.572	22.025	4.17053	1028.53	0.422659		0.204822		0.882843	0.000988998	0.0151038	0.0998519	0.0032141	0.370059	0.403567	0.00408203	0.000169859
		AL20-29_BSE-image2_pyroxene_6	Grain 1; relict core 2		53.045	0.079	1.54	7.174	0.228	14.915	22.631	0.253	0.016	0.026		52.192	0.055	0.94	22.88	0.408	21.27	0.807	-0.001	0.01	0.016		763.269	16.8381		763.269		899.164	862.186	16.8381	4.26371	982.084	0.447146		0.323619		0.882843	0.000988998	0.0151038	0.0998519	0.0032141	0.370059	0.403567	0.00408203	0.000169859
		AL20-29_BSE-image2_pyroxene_7	Grain 1; relict core 2		53.045	0.079	1.54	7.174	0.228	14.915	22.631	0.253	0.016	0.026		52.172	0.095	0.887	23.59	0.397	20.834	1.038	0.014	0.021	-0.024		760.059	17.2227		760.059		905.845	867.414	17.2227	4.24475	985.529	0.424798		0.416036		0.882843	0.000988998	0.0151038	0.0998519	0.0032141	0.370059	0.403567	0.00408203	0.000169859
		AL20-29_BSE-image2_pyroxene_8	Grain 1; relict core 2		53.045	0.079	1.54	7.174	0.228	14.915	22.631	0.253	0.016	0.026		52.084	0.004	0.789	23.99	0.436	20.482	1.125	0	0.011	0.005		759.598	18.5096		759.598		905.503	869.672	18.5096	4.8581	997.053	0.410658		0.452437		0.882843	0.000988998	0.0151038	0.0998519	0.0032141	0.370059	0.403567	0.00408203	0.000169859
AL20-29_BSE-image2_cpx_2	Grain 1; alteration	AL20-29_BSE-image2_pyroxene_1	Grain 1; relict core 1		51.939	0.167	2.061	7.139	0.169	14.27	22.006	0.305	0.024	0.148		52.18	0.018	1.015	23.479	0.435	21.308	0.375	0.002	0.023	0.006		789.861	24.358		789.861		921.915	887.137	24.358	2.0777	1062.84	0.454022		0.136516		0.864435	0.00209067	0.0202136	0.0993648	0.00238238	0.354056	0.392422	0.00492103	0.000254788
		AL20-29_BSE-image2_pyroxene_2	Grain 1; relict core 1		51.939	0.167	2.061	7.139	0.169	14.27	22.006	0.305	0.024	0.148		52.441	0.046	0.742	23.623	0.466	21.181	0.352	0.009	0.007	0.052		790.095	25.2234		790.095		922.769	890.472	25.2234	1.09329	1070.67	0.448564		0.12809		0.864435	0.00209067	0.0202136	0.0993648	0.00238238	0.354056	0.392422	0.00492103	0.000254788
		AL20-29_BSE-image2_pyroxene_3	Grain 1; relict core 1		51.939	0.167	2.061	7.139	0.169	14.27	22.006	0.305	0.024	0.148		51.058	1.423	0.897	24.374	0.439	20.688	1.021	0.005	0.006	0.002		757.567	11.0626		757.567		877.8	860.461	11.0626	0.0108708	942.567	0.424625		0.371292		0.864435	0.00209067	0.0202136	0.0993648	0.00238238	0.354056	0.392422	0.00492103	0.000254788
		AL20-29_BSE-image2_pyroxene_4	Grain 1; relict core 1		51.939	0.167	2.061	7.139	0.169	14.27	22.006	0.305	0.024	0.148		52.031	0.053	1.022	24.07	0.407	20.646	0.837	0.017	0.023	0.069		778.763	20.6831		778.763		917.716	883.62	20.6831	5.69084	1029.6	0.429115		0.305021		0.864435	0.00209067	0.0202136	0.0993648	0.00238238	0.354056	0.392422	0.00492103	0.000254788
		AL20-29_BSE-image2_pyroxene_5	Grain 1; relict core 2		51.939	0.167	2.061	7.139	0.169	14.27	22.006	0.305	0.024	0.148		51.957	0.075	0.891	23.978	0.415	21.07	0.51	-0.003	0.008	0.005		783.156	22.6082		783.156		916.266	885.411	22.6082	4.33691	1047.01	0.439607		0.186137		0.864435	0.00209067	0.0202136	0.0993648	0.00238238	0.354056	0.392422	0.00492103	0.000254788
		AL20-29_BSE-image2_pyroxene_6	Grain 1; relict core 2		51.939	0.167	2.061	7.139	0.169	14.27	22.006	0.305	0.024	0.148		52.192	0.055	0.94	22.88	0.408	21.27	0.807	-0.001	0.01	0.016		780.617	17.2072		780.617		903.849	870.023	17.2072	4.70095	998.152	0.465077		0.294097		0.864435	0.00209067	0.0202136	0.0993648	0.00238238	0.354056	0.392422	0.00492103	0.000254788
		AL20-29_BSE-image2_pyroxene_7	Grain 1; relict core 2		51.939	0.167	2.061	7.139	0.169	14.27	22.006	0.305	0.024	0.148		52.172	0.095	0.887	23.59	0.397	20.834	1.038	0.014	0.021	-0.024		777.054	17.5099		777.054		910.26	875.07	17.5099	4.78044	1000.89	0.441833		0.378083		0.864435	0.00209067	0.0202136	0.0993648	0.00238238	0.354056	0.392422	0.00492103	0.000254788
		AL20-29_BSE-image2_pyroxene_8	Grain 1; relict core 2		51.939	0.167	2.061	7.139	0.169	14.27	22.006	0.305	0.024	0.148		52.084	0.004	0.789	23.99	0.436	20.482	1.125	0	0.011	0.005		776.501	18.7737		776.501		909.819	877.289	18.7737	5.42186	1012.32	0.427126		0.411164		0.864435	0.00209067	0.0202136	0.0993648	0.00238238	0.354056	0.392422	0.00492103	0.000254788
AL20-29_BSE-image2_cpx_3	Grain 1; alteration	AL20-29_BSE-image2_pyroxene_1	Grain 1; relict core 1		52.763	0.139	1.543	7.011	0.18	14.639	22.72	0.233	0.01	0.131		52.18	0.018	1.015	23.479	0.435	21.308	0.375	0.002	0.023	0.006		750.496	22.9097		750.496		897.55	850.13	22.9097	2.22989	1012.64	0.434642		0.163715		0.87815	0.00174014	0.0151332	0.0975832	0.00253744	0.363211	0.405154	0.00375934	0.000106162
		AL20-29_BSE-image2_pyroxene_2	Grain 1; relict core 1		52.763	0.139	1.543	7.011	0.18	14.639	22.72	0.233	0.01	0.131		52.441	0.046	0.742	23.623	0.466	21.181	0.352	0.009	0.007	0.052		750.534	23.6799		750.534		897.975	852.888	23.6799	1.36959	1019.41	0.429418		0.153611		0.87815	0.00174014	0.0151332	0.0975832	0.00253744	0.363211	0.405154	0.00375934	0.000106162
		AL20-29_BSE-image2_pyroxene_3	Grain 1; relict core 1		52.763	0.139	1.543	7.011	0.18	14.639	22.72	0.233	0.01	0.131		51.058	1.423	0.897	24.374	0.439	20.688	1.021	0.005	0.006	0.002		722.18	10.5301		722.18		859.049	828.359	10.5301	-0.93536	903.79	0.4065		0.44527		0.87815	0.00174014	0.0151332	0.0975832	0.00253744	0.363211	0.405154	0.00375934	0.000106162
		AL20-29_BSE-image2_pyroxene_4	Grain 1; relict core 1		52.763	0.139	1.543	7.011	0.18	14.639	22.72	0.233	0.01	0.131		52.031	0.053	1.022	24.07	0.407	20.646	0.837	0.017	0.023	0.069		741.972	20.0349		741.972		896.775	849.433	20.0349	4.84281	987.361	0.410798		0.365794		0.87815	0.00174014	0.0151332	0.0975832	0.00253744	0.363211	0.405154	0.00375934	0.000106162
		AL20-29_BSE-image2_pyroxene_5	Grain 1; relict core 2		52.763	0.139	1.543	7.011	0.18	14.639	22.72	0.233	0.01	0.131		51.957	0.075	0.891	23.978	0.415	21.07	0.51	-0.003	0.008	0.005		745.077	21.546		745.077		893.734	849.77	21.546	4.00841	1000.65	0.420843		0.223224		0.87815	0.00174014	0.0151332	0.0975832	0.00253744	0.363211	0.405154	0.00375934	0.000106162
		AL20-29_BSE-image2_pyroxene_6	Grain 1; relict core 2		52.763	0.139	1.543	7.011	0.18	14.639	22.72	0.233	0.01	0.131		52.192	0.055	0.94	22.88	0.408	21.27	0.807	-0.001	0.01	0.016		743.501	16.535		743.501		883.435	836.785	16.535	3.87189	956.588	0.445225		0.352694		0.87815	0.00174014	0.0151332	0.0975832	0.00253744	0.363211	0.405154	0.00375934	0.000106162
		AL20-29_BSE-image2_pyroxene_7	Grain 1; relict core 2		52.763	0.139	1.543	7.011	0.18	14.639	22.72	0.233	0.01	0.131		52.172	0.095	0.887	23.59	0.397	20.834	1.038	0.014	0.021	-0.024		740.642	16.9869		740.642		890.15	841.918	16.9869	3.77474	960.562	0.422974		0.453414		0.87815	0.00174014	0.0151332	0.0975832	0.00253744	0.363211	0.405154	0.00375934	0.000106162
		AL20-29_BSE-image2_pyroxene_8	Grain 1; relict core 2		52.763	0.139	1.543	7.011	0.18	14.639	22.72	0.233	0.01	0.131		52.084	0.004	0.789	23.99	0.436	20.482	1.125	0	0.011	0.005		740.313	18.2928		740.313		889.895	844.105	18.2928	4.36758	972.044	0.408894		0.493086		0.87815	0.00174014	0.0151332	0.0975832	0.00253744	0.363211	0.405154	0.00375934	0.000106162
AL20-29_BSE-image2_cpx_4	Grain 2; alteration	AL20-29_BSE-image2_pyroxene_1	Grain 1; relict core 1		52.633	0.137	1.784	7.557	0.174	14.362	22.744	0.254	0.019	0.067		52.18	0.018	1.015	23.479	0.435	21.308	0.375	0.002	0.023	0.006		748.609	22.913		748.609		899.787	851.688	22.913	1.88539	1003.58	0.477527		0.163642		0.875986	0.0017151	0.0174969	0.105183	0.00245286	0.356338	0.405582	0.00409817	0.000201707
		AL20-29_BSE-image2_pyroxene_2	Grain 1; relict core 1		52.633	0.137	1.784	7.557	0.174	14.362	22.744	0.254	0.019	0.067		52.441	0.046	0.742	23.623	0.466	21.181	0.352	0.009	0.007	0.052		748.714	23.6834		748.714		900.216	854.456	23.6834	1.02776	1010.3	0.471787		0.153542		0.875986	0.0017151	0.0174969	0.105183	0.00245286	0.356338	0.405582	0.00409817	0.000201707
		AL20-29_BSE-image2_pyroxene_3	Grain 1; relict core 1		52.633	0.137	1.784	7.557	0.174	14.362	22.744	0.254	0.019	0.067		51.058	1.423	0.897	24.374	0.439	20.688	1.021	0.005	0.006	0.002		719.403	10.5313		719.403		861.09	829.831	10.5313	-1.31702	895.48	0.446608		0.445069		0.875986	0.0017151	0.0174969	0.105183	0.00245286	0.356338	0.405582	0.00409817	0.000201707
		AL20-29_BSE-image2_pyroxene_4	Grain 1; relict core 1		52.633	0.137	1.784	7.557	0.174	14.362	22.744	0.254	0.019	0.067		52.031	0.053	1.022	24.07	0.407	20.646	0.837	0.017	0.023	0.069		739.906	20.0364		739.906		899.001	850.982	20.0364	4.49276	978.462	0.45133		0.365629		0.875986	0.0017151	0.0174969	0.105183	0.00245286	0.356338	0.405582	0.00409817	0.000201707
		AL20-29_BSE-image2_pyroxene_5	Grain 1; relict core 2		52.633	0.137	1.784	7.557	0.174	14.362	22.744	0.254	0.019	0.067		51.957	0.075	0.891	23.978	0.415	21.07	0.51	-0.003	0.008	0.005		743.107	21.5484		743.107		895.949	851.323	21.5484	3.6614	991.662	0.462366		0.223123		0.875986	0.0017151	0.0174969	0.105183	0.00245286	0.356338	0.405582	0.00409817	0.000201707
		AL20-29_BSE-image2_pyroxene_6	Grain 1; relict core 2		52.633	0.137	1.784	7.557	0.174	14.362	22.744	0.254	0.019	0.067		52.192	0.055	0.94	22.88	0.408	21.27	0.807	-0.001	0.01	0.016		741.115	16.5365		741.115		885.595	838.289	16.5365	3.50735	947.907	0.489154		0.352535		0.875986	0.0017151	0.0174969	0.105183	0.00245286	0.356338	0.405582	0.00409817	0.000201707
		AL20-29_BSE-image2_pyroxene_7	Grain 1; relict core 2		52.633	0.137	1.784	7.557	0.174	14.362	22.744	0.254	0.019	0.067		52.172	0.095	0.887	23.59	0.397	20.834	1.038	0.014	0.021	-0.024		738.326	16.9881		738.326		892.342	843.439	16.9881	3.41387	951.85	0.464707		0.45321		0.875986	0.0017151	0.0174969	0.105183	0.00245286	0.356338	0.405582	0.00409817	0.000201707
		AL20-29_BSE-image2_pyroxene_8	Grain 1; relict core 2		52.633	0.137	1.784	7.557	0.174	14.362	22.744	0.254	0.019	0.067		52.084	0.004	0.789	23.99	0.436	20.482	1.125	0	0.011	0.005		738.121	18.2939		738.121		892.086	845.633	18.2939	4.01238	963.249	0.449238		0.492864		0.875986	0.0017151	0.0174969	0.105183	0.00245286	0.356338	0.405582	0.00409817	0.000201707
AL20-29_BSE-image2_cpx_5	Grain 2; alteration	AL20-29_BSE-image2_pyroxene_1	Grain 1; relict core 1		52.73	0.132	1.573	7.388	0.164	14.432	22.647	0.244	0.019	0.073		52.18	0.018	1.015	23.479	0.435	21.308	0.375	0.002	0.023	0.006		755.721	23.0668		755.721		898.684	851.301	23.0668	2.27495	1016.2	0.464583		0.160251		0.8776	0.0016525	0.0154275	0.10283	0.00231189	0.358075	0.403853	0.00393682	0.000201707
		AL20-29_BSE-image2_pyroxene_2	Grain 1; relict core 1		52.73	0.132	1.573	7.388	0.164	14.432	22.647	0.244	0.019	0.073		52.441	0.046	0.742	23.623	0.466	21.181	0.352	0.009	0.007	0.052		755.821	23.8474		755.821		899.152	854.099	23.8474	1.40299	1023.08	0.458999		0.150361		0.8776	0.0016525	0.0154275	0.10283	0.00231189	0.358075	0.403853	0.00393682	0.000201707
		AL20-29_BSE-image2_pyroxene_3	Grain 1; relict core 1		52.73	0.132	1.573	7.388	0.164	14.432	22.647	0.244	0.019	0.073		51.058	1.423	0.897	24.374	0.439	20.688	1.021	0.005	0.006	0.002		726.312	10.5879		726.312		859.72	829.169	10.5879	-0.800898	906.296	0.434502		0.435849		0.8776	0.0016525	0.0154275	0.10283	0.00231189	0.358075	0.403853	0.00393682	0.000201707
		AL20-29_BSE-image2_pyroxene_4	Grain 1; relict core 1		52.73	0.132	1.573	7.388	0.164	14.432	22.647	0.244	0.019	0.073		52.031	0.053	1.022	24.07	0.407	20.646	0.837	0.017	0.023	0.069		746.769	20.1053		746.769		897.557	850.325	20.1053	4.98968	990.119	0.439097		0.358054		0.8776	0.0016525	0.0154275	0.10283	0.00231189	0.358075	0.403853	0.00393682	0.000201707
		AL20-29_BSE-image2_pyroxene_5	Grain 1; relict core 2		52.73	0.132	1.573	7.388	0.164	14.432	22.647	0.244	0.019	0.073		51.957	0.075	0.891	23.978	0.415	21.07	0.51	-0.003	0.008	0.005		750.09	21.6613		750.09		894.69	850.806	21.6613	4.10237	1003.82	0.449834		0.218501		0.8776	0.0016525	0.0154275	0.10283	0.00231189	0.358075	0.403853	0.00393682	0.000201707
		AL20-29_BSE-image2_pyroxene_6	Grain 1; relict core 2		52.73	0.132	1.573	7.388	0.164	14.432	22.647	0.244	0.019	0.073		52.192	0.055	0.94	22.88	0.408	21.27	0.807	-0.001	0.01	0.016		748.145	16.6079		748.145		884.204	837.659	16.6079	4.00824	959.316	0.475896		0.345231		0.8776	0.0016525	0.0154275	0.10283	0.00231189	0.358075	0.403853	0.00393682	0.000201707
		AL20-29_BSE-image2_pyroxene_7	Grain 1; relict core 2		52.73	0.132	1.573	7.388	0.164	14.432	22.647	0.244	0.019	0.073		52.172	0.095	0.887	23.59	0.397	20.834	1.038	0.014	0.021	-0.024		745.236	17.0437		745.236		890.866	842.752	17.0437	3.93145	963.154	0.452111		0.443821		0.8776	0.0016525	0.0154275	0.10283	0.00231189	0.358075	0.403853	0.00393682	0.000201707
		AL20-29_BSE-image2_pyroxene_8	Grain 1; relict core 2		52.73	0.132	1.573	7.388	0.164	14.432	22.647	0.244	0.019	0.073		52.084	0.004	0.789	23.99	0.436	20.482	1.125	0	0.011	0.005		744.954	18.345		744.954		890.593	844.929	18.345	4.53276	974.615	0.437061		0.482653		0.8776	0.0016525	0.0154275	0.10283	0.00231189	0.358075	0.403853	0.00393682	0.000201707
AL20-29_BSE-image2_cpx_6	Grain 2; alteration	AL20-29_BSE-image2_pyroxene_1	Grain 1; relict core 1		52.683	0.141	1.632	7.42	0.121	14.376	22.409	0.272	-0.005	-0.007		52.18	0.018	1.015	23.479	0.435	21.308	0.375	0.002	0.023	0.006		771.508	23.6327		771.508		903.525	862.746	23.6327	2.42025	1042.84	0.468413		0.148905		0.876818	0.00176517	0.0160061	0.103276	0.00170573	0.356686	0.399608	0.00438859	-5.30808e-05
		AL20-29_BSE-image2_pyroxene_2	Grain 1; relict core 1		52.683	0.141	1.632	7.42	0.121	14.376	22.409	0.272	-0.005	-0.007		52.441	0.046	0.742	23.623	0.466	21.181	0.352	0.009	0.007	0.052		771.678	24.4504		771.678		904.15	865.743	24.4504	1.49955	1050.16	0.462783		0.139715		0.876818	0.00176517	0.0160061	0.103276	0.00170573	0.356686	0.399608	0.00438859	-5.30808e-05
		AL20-29_BSE-image2_pyroxene_3	Grain 1; relict core 1		52.683	0.141	1.632	7.42	0.121	14.376	22.409	0.272	-0.005	-0.007		51.058	1.423	0.897	24.374	0.439	20.688	1.021	0.005	0.006	0.002		740.613	10.7959		740.613		862.815	838.914	10.7959	-0.223352	927.892	0.438084		0.40499		0.876818	0.00176517	0.0160061	0.103276	0.00170573	0.356686	0.399608	0.00438859	-5.30808e-05
		AL20-29_BSE-image2_pyroxene_4	Grain 1; relict core 1		52.683	0.141	1.632	7.42	0.121	14.376	22.409	0.272	-0.005	-0.007		52.031	0.053	1.022	24.07	0.407	20.646	0.837	0.017	0.023	0.069		761.563	20.3585		761.563		901.115	860.724	20.3585	5.52634	1013.52	0.442716		0.332704		0.876818	0.00176517	0.0160061	0.103276	0.00170573	0.356686	0.399608	0.00438859	-5.30808e-05
		AL20-29_BSE-image2_pyroxene_5	Grain 1; relict core 2		52.683	0.141	1.632	7.42	0.121	14.376	22.409	0.272	-0.005	-0.007		51.957	0.075	0.891	23.978	0.415	21.07	0.51	-0.003	0.008	0.005		765.38	22.0762		765.38		898.879	861.745	22.0762	4.43571	1028.9	0.453542		0.20303		0.876818	0.00176517	0.0160061	0.103276	0.00170573	0.356686	0.399608	0.00438859	-5.30808e-05
		AL20-29_BSE-image2_pyroxene_6	Grain 1; relict core 2		52.683	0.141	1.632	7.42	0.121	14.376	22.409	0.272	-0.005	-0.007		52.192	0.055	0.94	22.88	0.408	21.27	0.807	-0.001	0.01	0.016		763.095	16.8706		763.095		887.694	847.779	16.8706	4.53876	982.288	0.479819		0.320789		0.876818	0.00176517	0.0160061	0.103276	0.00170573	0.356686	0.399608	0.00438859	-5.30808e-05
		AL20-29_BSE-image2_pyroxene_7	Grain 1; relict core 2		52.683	0.141	1.632	7.42	0.121	14.376	22.409	0.272	-0.005	-0.007		52.172	0.095	0.887	23.59	0.397	20.834	1.038	0.014	0.021	-0.024		759.904	17.248		759.904		894.176	852.809	17.248	4.53068	985.668	0.455838		0.412398		0.876818	0.00176517	0.0160061	0.103276	0.00170573	0.356686	0.399608	0.00438859	-5.30808e-05
		AL20-29_BSE-image2_pyroxene_8	Grain 1; relict core 2		52.683	0.141	1.632	7.42	0.121	14.376	22.409	0.272	-0.005	-0.007		52.084	0.004	0.789	23.99	0.436	20.482	1.125	0	0.011	0.005		759.524	18.5328		759.524		893.835	854.985	18.5328	5.15049	997.174	0.440664		0.44848		0.876818	0.00176517	0.0160061	0.103276	0.00170573	0.356686	0.399608	0.00438859	-5.30808e-05
AL20-29_BSE-image2_cpx_7	Grain 2; alteration	AL20-29_BSE-image2_pyroxene_1	Grain 1; relict core 1		53.047	0.044	1.114	7.276	0.173	14.65	22.819	0.215	0.015	-0.026		52.18	0.018	1.015	23.479	0.435	21.308	0.375	0.002	0.023	0.006		739.187	22.5141		739.187		886.289	835.809	22.5141	2.47169	997.622	0.450732		0.173138		0.882876	0.000550835	0.0109257	0.101272	0.00243877	0.363484	0.40692	0.00346892	0.000159242
		AL20-29_BSE-image2_pyroxene_2	Grain 1; relict core 1		53.047	0.044	1.114	7.276	0.173	14.65	22.819	0.215	0.015	-0.026		52.441	0.046	0.742	23.623	0.466	21.181	0.352	0.009	0.007	0.052		739.207	23.2583		739.207		886.602	838.394	23.2583	1.64687	1004.11	0.445314		0.162452		0.882876	0.000550835	0.0109257	0.101272	0.00243877	0.363484	0.40692	0.00346892	0.000159242
		AL20-29_BSE-image2_pyroxene_3	Grain 1; relict core 1		53.047	0.044	1.114	7.276	0.173	14.65	22.819	0.215	0.015	-0.026		51.058	1.423	0.897	24.374	0.439	20.688	1.021	0.005	0.006	0.002		711.458	10.3847		711.458		849.63	815.487	10.3847	-1.01608	891.934	0.421548		0.470898		0.882876	0.000550835	0.0109257	0.101272	0.00243877	0.363484	0.40692	0.00346892	0.000159242
		AL20-29_BSE-image2_pyroxene_4	Grain 1; relict core 1		53.047	0.044	1.114	7.276	0.173	14.65	22.819	0.215	0.015	-0.026		52.031	0.053	1.022	24.07	0.407	20.646	0.837	0.017	0.023	0.069		731.24	19.8579		731.24		886.391	835.806	19.8579	4.80572	974.477	0.426005		0.386848		0.882876	0.000550835	0.0109257	0.101272	0.00243877	0.363484	0.40692	0.00346892	0.000159242
		AL20-29_BSE-image2_pyroxene_5	Grain 1; relict core 2		53.047	0.044	1.114	7.276	0.173	14.65	22.819	0.215	0.015	-0.026		51.957	0.075	0.891	23.978	0.415	21.07	0.51	-0.003	0.008	0.005		734.06	21.2559		734.06		882.979	835.785	21.2559	4.11626	986.659	0.436422		0.236072		0.882876	0.000550835	0.0109257	0.101272	0.00243877	0.363484	0.40692	0.00346892	0.000159242
		AL20-29_BSE-image2_pyroxene_6	Grain 1; relict core 2		53.047	0.044	1.114	7.276	0.173	14.65	22.819	0.215	0.015	-0.026		52.192	0.055	0.94	22.88	0.408	21.27	0.807	-0.001	0.01	0.016		732.527	16.3514		732.527		873.331	823.539	16.3514	3.83308	943.924	0.461707		0.372994		0.882876	0.000550835	0.0109257	0.101272	0.00243877	0.363484	0.40692	0.00346892	0.000159242
		AL20-29_BSE-image2_pyroxene_7	Grain 1; relict core 2		53.047	0.044	1.114	7.276	0.173	14.65	22.819	0.215	0.015	-0.026		52.172	0.095	0.887	23.59	0.397	20.834	1.038	0.014	0.021	-0.024		729.883	16.8441		729.883		880.051	828.634	16.8441	3.68872	948.217	0.438631		0.479511		0.882876	0.000550835	0.0109257	0.101272	0.00243877	0.363484	0.40692	0.00346892	0.000159242
		AL20-29_BSE-image2_pyroxene_8	Grain 1; relict core 2		53.047	0.044	1.114	7.276	0.173	14.65	22.819	0.215	0.015	-0.026		52.084	0.004	0.789	23.99	0.436	20.482	1.125	0	0.011	0.005		729.673	18.1615		729.673		879.846	830.786	18.1615	4.27086	959.696	0.424031		0.521466		0.882876	0.000550835	0.0109257	0.101272	0.00243877	0.363484	0.40692	0.00346892	0.000159242
AL20-29_BSE-image2_cpx_8	Grain 2; alteration	AL20-29_BSE-image2_pyroxene_1	Grain 1; relict core 1		53.001	0.062	1.48	7.19	0.15	14.621	22.71	0.277	0.009	0.005		52.18	0.018	1.015	23.479	0.435	21.308	0.375	0.002	0.023	0.006		747.818	23.0412		747.818		893.722	848.552	23.0412	2.14988	1009.12	0.446288		0.160807		0.882111	0.000776176	0.0145154	0.100075	0.00211454	0.362764	0.404976	0.00446926	9.55455e-05
		AL20-29_BSE-image2_pyroxene_2	Grain 1; relict core 1		53.001	0.062	1.48	7.19	0.15	14.621	22.71	0.277	0.009	0.005		52.441	0.046	0.742	23.623	0.466	21.181	0.352	0.009	0.007	0.052		747.896	23.82		747.896		894.179	851.326	23.82	1.27926	1015.94	0.440923		0.150882		0.882111	0.000776176	0.0145154	0.100075	0.00211454	0.362764	0.404976	0.00446926	9.55455e-05
		AL20-29_BSE-image2_pyroxene_3	Grain 1; relict core 1		53.001	0.062	1.48	7.19	0.15	14.621	22.71	0.277	0.009	0.005		51.058	1.423	0.897	24.374	0.439	20.688	1.021	0.005	0.006	0.002		719.177	10.5784		719.177		855.238	826.61	10.5784	-0.914056	899.94	0.417391		0.437359		0.882111	0.000776176	0.0145154	0.100075	0.00211454	0.362764	0.404976	0.00446926	9.55455e-05
		AL20-29_BSE-image2_pyroxene_4	Grain 1; relict core 1		53.001	0.062	1.48	7.19	0.15	14.621	22.71	0.277	0.009	0.005		52.031	0.053	1.022	24.07	0.407	20.646	0.837	0.017	0.023	0.069		739.134	20.0938		739.134		892.664	847.627	20.0938	4.85691	983.299	0.421805		0.359295		0.882111	0.000776176	0.0145154	0.100075	0.00211454	0.362764	0.404976	0.00446926	9.55455e-05
		AL20-29_BSE-image2_pyroxene_5	Grain 1; relict core 2		53.001	0.062	1.48	7.19	0.15	14.621	22.71	0.277	0.009	0.005		51.957	0.075	0.891	23.978	0.415	21.07	0.51	-0.003	0.008	0.005		742.325	21.6425		742.325		889.8	848.082	21.6425	3.97397	996.866	0.432119		0.219258		0.882111	0.000776176	0.0145154	0.100075	0.00211454	0.362764	0.404976	0.00446926	9.55455e-05
		AL20-29_BSE-image2_pyroxene_6	Grain 1; relict core 2		53.001	0.062	1.48	7.19	0.15	14.621	22.71	0.277	0.009	0.005		52.192	0.055	0.94	22.88	0.408	21.27	0.807	-0.001	0.01	0.016		740.555	16.596		740.555		879.454	835.04	16.596	3.87805	952.657	0.457155		0.346428		0.882111	0.000776176	0.0145154	0.100075	0.00211454	0.362764	0.404976	0.00446926	9.55455e-05
		AL20-29_BSE-image2_pyroxene_7	Grain 1; relict core 2		53.001	0.062	1.48	7.19	0.15	14.621	22.71	0.277	0.009	0.005		52.172	0.095	0.887	23.59	0.397	20.834	1.038	0.014	0.021	-0.024		737.711	17.0344		737.711		886.055	840.109	17.0344	3.80049	956.497	0.434307		0.445359		0.882111	0.000776176	0.0145154	0.100075	0.00211454	0.362764	0.404976	0.00446926	9.55455e-05
		AL20-29_BSE-image2_pyroxene_8	Grain 1; relict core 2		53.001	0.062	1.48	7.19	0.15	14.621	22.71	0.277	0.009	0.005		52.084	0.004	0.789	23.99	0.436	20.482	1.125	0	0.011	0.005		737.419	18.3365		737.419		885.788	842.274	18.3365	4.40034	967.904	0.41985		0.484325		0.882111	0.000776176	0.0145154	0.100075	0.00211454	0.362764	0.404976	0.00446926	9.55455e-05
AL20-27_BSE-image1_cpx_1	Grain 1; alteration	AL20-27_BSE-image1_pyroxene_1	Grain 1; relict core 1		52.428	0.176	1.949	5.891	0.189	15.332	22.94	0.126	0.009	-0.01		52.772	0.044	1.583	20.173	0.527	23.75	0.58	-0.004	0.022	0.019		754.755	12.3545		754.755		865.612	829.909	12.3545	1.83772	920.254	0.452359		0.2706		0.872574	0.00220334	0.0191152	0.0819944	0.00266432	0.380405	0.409077	0.00203295	9.55455e-05
		AL20-27_BSE-image1_pyroxene_2	Grain 1; relict core 1		52.428	0.176	1.949	5.891	0.189	15.332	22.94	0.126	0.009	-0.01		52.627	0.08	1.334	19.783	0.527	23.843	0.634	-0.003	0.013	0.015		755.155	11.0109		755.155		862.152	827.705	11.0109	1.52111	908.436	0.463083		0.297292		0.872574	0.00220334	0.0191152	0.0819944	0.00266432	0.380405	0.409077	0.00203295	9.55455e-05
		AL20-27_BSE-image1_pyroxene_3	Grain 1; relict core 1		52.428	0.176	1.949	5.891	0.189	15.332	22.94	0.126	0.009	-0.01		53.254	0.062	1.374	19.772	0.517	24.224	0.727	0.008	0.012	0.009		756.696	10.4975		756.696		865.061	827.717	10.4975	1.68314	903.921	0.470745		0.33682		0.872574	0.00220334	0.0191152	0.0819944	0.00266432	0.380405	0.409077	0.00203295	9.55455e-05
		AL20-27_BSE-image1_pyroxene_4	Grain 1; relict core 1		52.428	0.176	1.949	5.891	0.189	15.332	22.94	0.126	0.009	-0.01		52.826	0.062	1.398	19.96	0.564	23.946	0.314	0.014	0.011	-0.018		761.871	16.0582		761.871		874.518	837.356	16.0582	-1.68613	952.83	0.460959		0.146829		0.872574	0.00220334	0.0191152	0.0819944	0.00266432	0.380405	0.409077	0.00203295	9.55455e-05
		AL20-27_BSE-image1_pyroxene_5	Grain 1; relict core 2		52.428	0.176	1.949	5.891	0.189	15.332	22.94	0.126	0.009	-0.01		52.929	0.075	1.497	19.945	0.552	23.721	0.445	-0.007	0.015	0.015		755.713	12.8791		755.713		863.411	828.935	12.8791	0.445531	924.868	0.456972		0.207823		0.872574	0.00220334	0.0191152	0.0819944	0.00266432	0.380405	0.409077	0.00203295	9.55455e-05
		AL20-27_BSE-image1_pyroxene_6	Grain 1; relict core 2		52.428	0.176	1.949	5.891	0.189	15.332	22.94	0.126	0.009	-0.01		53.08	0.084	1.322	19.311	0.543	24.027	0.75	-0.013	0.007	0.011		755.555	8.97588		755.555		855.937	821.389	8.97588	1.29024	890.538	0.478063		0.349753		0.872574	0.00220334	0.0191152	0.0819944	0.00266432	0.380405	0.409077	0.00203295	9.55455e-05
		AL20-27_BSE-image1_pyroxene_7	Grain 1; relict core 2		52.428	0.176	1.949	5.891	0.189	15.332	22.94	0.126	0.009	-0.01		52.947	0.053	1.34	19.852	0.592	24.038	0.334	0.004	0.007	0.043		761.551	15.3031		761.551		868.784	834.631	15.3031	-1.3313	946.189	0.465248		0.155912		0.872574	0.00220334	0.0191152	0.0819944	0.00266432	0.380405	0.409077	0.00203295	9.55455e-05
		AL20-27_BSE-image1_pyroxene_8	Grain 1; relict core 2		52.428	0.176	1.949	5.891	0.189	15.332	22.94	0.126	0.009	-0.01		52.849	0.097	1.423	19.85	0.579	23.916	0.526	0.001	0.014	0.026		756.025	11.9603		756.025		860.387	826.942	11.9603	0.998767	916.787	0.462933		0.245524		0.872574	0.00220334	0.0191152	0.0819944	0.00266432	0.380405	0.409077	0.00203295	9.55455e-05
AL20-27_BSE-image1_cpx_2	Grain 1; alteration	AL20-27_BSE-image1_pyroxene_1	Grain 1; relict core 1		52.829	0.141	1.793	5.672	0.201	15.444	23.048	0.121	0.022	0.009		52.772	0.044	1.583	20.173	0.527	23.75	0.58	-0.004	0.022	0.019		752.83	12.3108		752.83		858.169	820.971	12.3108	2.14357	917.478	0.432384		0.273316		0.879248	0.00176517	0.0175852	0.0789462	0.00283348	0.383184	0.411003	0.00195228	0.000233556
		AL20-27_BSE-image1_pyroxene_2	Grain 1; relict core 1		52.829	0.141	1.793	5.672	0.201	15.444	23.048	0.121	0.022	0.009		52.627	0.08	1.334	19.783	0.527	23.843	0.634	-0.003	0.013	0.015		753.278	10.9711		753.278		854.782	818.826	10.9711	1.82371	905.719	0.442634		0.300276		0.879248	0.00176517	0.0175852	0.0789462	0.00283348	0.383184	0.411003	0.00195228	0.000233556
		AL20-27_BSE-image1_pyroxene_3	Grain 1; relict core 1		52.829	0.141	1.793	5.672	0.201	15.444	23.048	0.121	0.022	0.009		53.254	0.062	1.374	19.772	0.517	24.224	0.727	0.008	0.012	0.009		754.842	10.4624		754.842		857.659	818.852	10.4624	1.98024	901.253	0.449958		0.340201		0.879248	0.00176517	0.0175852	0.0789462	0.00283348	0.383184	0.411003	0.00195228	0.000233556
		AL20-27_BSE-image1_pyroxene_4	Grain 1; relict core 1		52.829	0.141	1.793	5.672	0.201	15.444	23.048	0.121	0.022	0.009		52.826	0.062	1.398	19.96	0.564	23.946	0.314	0.014	0.011	-0.018		759.729	15.9776		759.729		866.783	828.147	15.9776	-1.33862	949.666	0.440604		0.148302		0.879248	0.00176517	0.0175852	0.0789462	0.00283348	0.383184	0.411003	0.00195228	0.000233556
		AL20-27_BSE-image1_pyroxene_5	Grain 1; relict core 2		52.829	0.141	1.793	5.672	0.201	15.444	23.048	0.121	0.022	0.009		52.929	0.075	1.497	19.945	0.552	23.721	0.445	-0.007	0.015	0.015		753.739	12.8222		753.739		855.957	819.98	12.8222	0.767619	921.967	0.436793		0.209908		0.879248	0.00176517	0.0175852	0.0789462	0.00283348	0.383184	0.411003	0.00195228	0.000233556
		AL20-27_BSE-image1_pyroxene_6	Grain 1; relict core 2		52.829	0.141	1.793	5.672	0.201	15.444	23.048	0.121	0.022	0.009		53.08	0.084	1.322	19.311	0.543	24.027	0.75	-0.013	0.007	0.011		753.756	8.94207		753.756		848.694	812.662	8.94207	1.58797	887.908	0.456953		0.353263		0.879248	0.00176517	0.0175852	0.0789462	0.00283348	0.383184	0.411003	0.00195228	0.000233556
		AL20-27_BSE-image1_pyroxene_7	Grain 1; relict core 2		52.829	0.141	1.793	5.672	0.201	15.444	23.048	0.121	0.022	0.009		52.947	0.053	1.34	19.852	0.592	24.038	0.334	0.004	0.007	0.043		759.443	15.2272		759.443		861.167	825.496	15.2272	-0.98881	943.078	0.444703		0.157477		0.879248	0.00176517	0.0175852	0.0789462	0.00283348	0.383184	0.411003	0.00195228	0.000233556
		AL20-27_BSE-image1_pyroxene_8	Grain 1; relict core 2		52.829	0.141	1.793	5.672	0.201	15.444	23.048	0.121	0.022	0.009		52.849	0.097	1.423	19.85	0.579	23.916	0.526	0.001	0.014	0.026		754.098	11.9121		754.098		853.017	818.055	11.9121	1.31076	913.978	0.442491		0.247989		0.879248	0.00176517	0.0175852	0.0789462	0.00283348	0.383184	0.411003	0.00195228	0.000233556
AL20-27_BSE-image1_cpx_3	Grain 1; alteration	AL20-27_BSE-image1_pyroxene_1	Grain 1; relict core 1		52.544	0.137	1.857	9.724	0.302	17.271	17.545	0.129	0.02	0.057		52.772	0.044	1.583	20.173	0.527	23.75	0.58	-0.004	0.022	0.019		1073	23.5777		1073		1102.37	1143.45	23.5777	0.297133	1366.26	0.662858		0.0761805		0.874505	0.0017151	0.0182128	0.135344	0.00425727	0.428514	0.312871	0.00208135	0.000212323
		AL20-27_BSE-image1_pyroxene_2	Grain 1; relict core 1		52.544	0.137	1.857	9.724	0.302	17.271	17.545	0.129	0.02	0.057		52.627	0.08	1.334	19.783	0.527	23.843	0.634	-0.003	0.013	0.015		1070.68	21.2264		1070.68		1090.74	1133.54	21.2264	1.26403	1340.02	0.678572		0.0836949		0.874505	0.0017151	0.0182128	0.135344	0.00425727	0.428514	0.312871	0.00208135	0.000212323
		AL20-27_BSE-image1_pyroxene_3	Grain 1; relict core 1		52.544	0.137	1.857	9.724	0.302	17.271	17.545	0.129	0.02	0.057		53.254	0.062	1.374	19.772	0.517	24.224	0.727	0.008	0.012	0.009		1069.15	19.5142		1069.15		1088.25	1126.82	19.5142	2.96025	1320.91	0.689799		0.0948229		0.874505	0.0017151	0.0182128	0.135344	0.00425727	0.428514	0.312871	0.00208135	0.000212323
		AL20-27_BSE-image1_pyroxene_4	Grain 1; relict core 1		52.544	0.137	1.857	9.724	0.302	17.271	17.545	0.129	0.02	0.057		52.826	0.062	1.398	19.96	0.564	23.946	0.314	0.014	0.011	-0.018		1113.82	36.7421		1113.82		1179.15	1216.24	36.7421	-14.907	1513.18	0.67546		0.0413358		0.874505	0.0017151	0.0182128	0.135344	0.00425727	0.428514	0.312871	0.00208135	0.000212323
		AL20-27_BSE-image1_pyroxene_5	Grain 1; relict core 2		52.544	0.137	1.857	9.724	0.302	17.271	17.545	0.129	0.02	0.057		52.929	0.075	1.497	19.945	0.552	23.721	0.445	-0.007	0.015	0.015		1085.57	27.4925		1085.57		1119.66	1161.38	27.4925	-5.30142	1409.95	0.669617		0.058507		0.874505	0.0017151	0.0182128	0.135344	0.00425727	0.428514	0.312871	0.00208135	0.000212323
		AL20-27_BSE-image1_pyroxene_6	Grain 1; relict core 2		52.544	0.137	1.857	9.724	0.302	17.271	17.545	0.129	0.02	0.057		53.08	0.084	1.322	19.311	0.543	24.027	0.75	-0.013	0.007	0.011		1066.58	17.6591		1066.58		1071.93	1113.31	17.6591	2.9678	1300.21	0.700523		0.0984638		0.874505	0.0017151	0.0182128	0.135344	0.00425727	0.428514	0.312871	0.00208135	0.000212323
		AL20-27_BSE-image1_pyroxene_7	Grain 1; relict core 2		52.544	0.137	1.857	9.724	0.302	17.271	17.545	0.129	0.02	0.057		52.947	0.053	1.34	19.852	0.592	24.038	0.334	0.004	0.007	0.043		1109.86	34.7819		1109.86		1160.58	1202.78	34.7819	-13.0353	1491.3	0.681744		0.0438931		0.874505	0.0017151	0.0182128	0.135344	0.00425727	0.428514	0.312871	0.00208135	0.000212323
		AL20-27_BSE-image1_pyroxene_8	Grain 1; relict core 2		52.544	0.137	1.857	9.724	0.302	17.271	17.545	0.129	0.02	0.057		52.849	0.097	1.423	19.85	0.579	23.916	0.526	0.001	0.014	0.026		1079.11	24.3297		1079.11		1100.81	1144.39	24.3297	-1.92298	1374.65	0.678353		0.069121		0.874505	0.0017151	0.0182128	0.135344	0.00425727	0.428514	0.312871	0.00208135	0.000212323
AL20-27_BSE-image1_cpx_4	Grain 1; alteration	AL20-27_BSE-image1_pyroxene_1	Grain 1; relict core 1		52.551	0.201	2.146	6	0.218	15.226	23.111	0.154	0.013	0.006		52.772	0.044	1.583	20.173	0.527	23.75	0.58	-0.004	0.022	0.019		742.916	12.2437		742.916		859.991	821.315	12.2437	1.47485	902.747	0.463937		0.277597		0.874621	0.00251631	0.0210473	0.0835115	0.00307313	0.377775	0.412127	0.00248472	0.00013801
		AL20-27_BSE-image1_pyroxene_2	Grain 1; relict core 1		52.551	0.201	2.146	6	0.218	15.226	23.111	0.154	0.013	0.006		52.627	0.08	1.334	19.783	0.527	23.843	0.634	-0.003	0.013	0.015		743.28	10.91		743.28		856.612	819.185	10.91	1.14274	891.179	0.474935		0.304979		0.874621	0.00251631	0.0210473	0.0835115	0.00307313	0.377775	0.412127	0.00248472	0.00013801
		AL20-27_BSE-image1_pyroxene_3	Grain 1; relict core 1		52.551	0.201	2.146	6	0.218	15.226	23.111	0.154	0.013	0.006		53.254	0.062	1.374	19.772	0.517	24.224	0.727	0.008	0.012	0.009		744.804	10.4085		744.804		859.528	819.232	10.4085	1.28747	886.829	0.482793		0.345529		0.874621	0.00251631	0.0210473	0.0835115	0.00307313	0.377775	0.412127	0.00248472	0.00013801
		AL20-27_BSE-image1_pyroxene_4	Grain 1; relict core 1		52.551	0.201	2.146	6	0.218	15.226	23.111	0.154	0.013	0.006		52.826	0.062	1.398	19.96	0.564	23.946	0.314	0.014	0.011	-0.018		749.79	15.8539		749.79		868.429	828.325	15.8539	-1.92955	934.061	0.472757		0.150625		0.874621	0.00251631	0.0210473	0.0835115	0.00307313	0.377775	0.412127	0.00248472	0.00013801
		AL20-27_BSE-image1_pyroxene_5	Grain 1; relict core 2		52.551	0.201	2.146	6	0.218	15.226	23.111	0.154	0.013	0.006		52.929	0.075	1.497	19.945	0.552	23.721	0.445	-0.007	0.015	0.015		743.782	12.7347		743.782		857.696	820.262	12.7347	0.125244	907.006	0.468667		0.213196		0.874621	0.00251631	0.0210473	0.0835115	0.00307313	0.377775	0.412127	0.00248472	0.00013801
		AL20-27_BSE-image1_pyroxene_6	Grain 1; relict core 2		52.551	0.201	2.146	6	0.218	15.226	23.111	0.154	0.013	0.006		53.08	0.084	1.322	19.311	0.543	24.027	0.75	-0.013	0.007	0.011		743.635	8.89012		743.635		850.531	813.043	8.89012	0.888746	873.66	0.490298		0.358796		0.874621	0.00251631	0.0210473	0.0835115	0.00307313	0.377775	0.412127	0.00248472	0.00013801
		AL20-27_BSE-image1_pyroxene_7	Grain 1; relict core 2		52.551	0.201	2.146	6	0.218	15.226	23.111	0.154	0.013	0.006		52.947	0.053	1.34	19.852	0.592	24.038	0.334	0.004	0.007	0.043		749.472	15.1107		749.472		862.819	825.695	15.1107	-1.59121	927.614	0.477155		0.159944		0.874621	0.00251631	0.0210473	0.0835115	0.00307313	0.377775	0.412127	0.00248472	0.00013801
		AL20-27_BSE-image1_pyroxene_8	Grain 1; relict core 2		52.551	0.201	2.146	6	0.218	15.226	23.111	0.154	0.013	0.006		52.849	0.097	1.423	19.85	0.579	23.916	0.526	0.001	0.014	0.026		744.107	11.8381		744.107		854.793	818.376	11.8381	0.648152	899.229	0.474781		0.251873		0.874621	0.00251631	0.0210473	0.0835115	0.00307313	0.377775	0.412127	0.00248472	0.00013801
AL20-27_BSE-image1_cpx_5	Grain 1; alteration	AL20-27_BSE-image1_pyroxene_1	Grain 1; relict core 1		52.379	0.17	1.954	7.66	0.267	15.989	20.447	0.125	0.019	0.015		52.772	0.044	1.583	20.173	0.527	23.75	0.58	-0.004	0.022	0.019		951.627	17.4331		951.627		994.968	1008.21	17.4331	3.4587	1180.25	0.564028		0.125577		0.871759	0.00212822	0.0191642	0.106616	0.00376388	0.396706	0.364621	0.00201682	0.000201707
		AL20-27_BSE-image1_pyroxene_2	Grain 1; relict core 1		52.379	0.17	1.954	7.66	0.267	15.989	20.447	0.125	0.019	0.015		52.627	0.08	1.334	19.783	0.527	23.843	0.634	-0.003	0.013	0.015		951.088	15.6335		951.088		988.168	1002.94	15.6335	3.7359	1161.67	0.577399		0.137964		0.871759	0.00212822	0.0191642	0.106616	0.00376388	0.396706	0.364621	0.00201682	0.000201707
		AL20-27_BSE-image1_pyroxene_3	Grain 1; relict core 1		52.379	0.17	1.954	7.66	0.267	15.989	20.447	0.125	0.019	0.015		53.254	0.062	1.374	19.772	0.517	24.224	0.727	0.008	0.012	0.009		951.607	14.5777		951.607		989.33	1000.56	14.5777	4.60868	1150.76	0.586952		0.156308		0.871759	0.00212822	0.0191642	0.106616	0.00376388	0.396706	0.364621	0.00201682	0.000201707
[truncated: 222 more rows]
[truncated: 114 more columns]
